# Supplementary material
Source: PubMed Central journal article supplement (PMC7094660)
Supplement: mmc1.pdf [file mmc1.pdf]

**Supplement 1.** List of genes affected by pregnancy in the intercaruncular endometrium on d 17 of the cycle or pregnancy. Genes were selected based on an absolute expression value > 40 and P-value <0.01. Fold effect and regulation columns consider the effects of pregnancy using the cyclic endometrium as the reference. (i.e. Down regulation means the pregnant endometrium has a lower gene expression than cyclic endometrium)

| Gene Title                                    | Gene Symbol          | Entrez Gene            | Putative Function                                                                                                                                                                                                                                                     | P-value  | Fold Effect | Regulation |
|-----------------------------------------------|----------------------|------------------------|-----------------------------------------------------------------------------------------------------------------------------------------------------------------------------------------------------------------------------------------------------------------------|----------|-------------|------------|
| similar to C1qR(p)                            | <i>LOC53969</i><br>0 | <a href="#">539690</a> | ---                                                                                                                                                                                                                                                                   | 5.44E-09 | 0.19        | Down       |
| oxytocin receptor                             | <i>OXTR</i>          | <a href="#">281371</a> | 0007165 // signal transduction // inferred from electronic annotation ///<br>0007186 // G-protein coupled receptor protein signaling pathway // inferred from electronic annotation ///<br>0045777 // positive regulation of blood pressure // inferred from electron | 0.00027  | 0.20        | Down       |
| polymeric immunoglobulin receptor             | <i>PIGR</i>          | <a href="#">281401</a> | ---                                                                                                                                                                                                                                                                   | 4.75E-07 | 0.20        | Down       |
| Similar to collagen, type XIV, alpha 1        | <i>LOC78149</i><br>3 | <a href="#">781493</a> | ---                                                                                                                                                                                                                                                                   | 3.59E-08 | 0.21        | Down       |
| immunoglobulin superfamily, member 10         | <i>IGSF10</i>        | <a href="#">537487</a> | ---                                                                                                                                                                                                                                                                   | 3.26E-08 | 0.23        | Down       |
| glutamate receptor, ionotropic, kainate 1     | <i>GRIK1</i>         | <a href="#">533760</a> | 0006810 // transport // inferred from electronic annotation /// 0006811 // ion transport // inferred from electronic annotation                                                                                                                                       | 4.16E-05 | 0.23        | Down       |
| SH3 domain binding glutamic acid-rich protein | <i>SH3BGR</i>        | <a href="#">617797</a> | ---                                                                                                                                                                                                                                                                   | 1.92E-08 | 0.24        | Down       |

| Gene Title                                                       | Gene Symbol   | Entrez Gene            | Putative Function                                                                                                                                                                                          | P-value  | Fold Effect | Regulation |
|------------------------------------------------------------------|---------------|------------------------|------------------------------------------------------------------------------------------------------------------------------------------------------------------------------------------------------------|----------|-------------|------------|
| plasmalemma vesicle associated protein                           | <i>PLVAP</i>  | <a href="#">524990</a> | ---                                                                                                                                                                                                        | 3.84E-07 | 0.25        | Down       |
| sodium channel, nonvoltage-gated 1 alpha                         | <i>SCNN1A</i> | <a href="#">282348</a> | 0006810 // transport // inferred from electronic annotation /// 0006811 // ion transport // inferred from electronic annotation /// 0006814 // sodium ion transport // inferred from electronic annotation | 1.17E-06 | 0.25        | Down       |
| immunoglobulin superfamily containing leucine-rich repeat        | <i>ISLR</i>   | <a href="#">515018</a> | ---                                                                                                                                                                                                        | 1.16E-06 | 0.26        | Down       |
| leucine rich repeat and fibronectin type III domain containing 5 | <i>LRFN5</i>  | <a href="#">539366</a> | ---                                                                                                                                                                                                        | 0.000357 | 0.27        | Down       |
| glycosyltransferase 8 domain containing 2                        | <i>GLT8D2</i> | <a href="#">523294</a> | 0016051 // carbohydrate biosynthetic process // inferred from electronic annotation                                                                                                                        | 4.07E-08 | 0.27        | Down       |
| endothelin 3                                                     | <i>EDN3</i>   | <a href="#">513753</a> | 0019229 // regulation of vasoconstriction // inferred from electronic annotation                                                                                                                           | 7.11E-05 | 0.28        | Down       |
| Carbonic anhydrase VIII                                          | <i>CA8</i>    | <a href="#">515918</a> | 0006730 // one-carbon compound metabolic process // inferred from electronic annotation                                                                                                                    | 2.33E-07 | 0.30        | Down       |
| carbonic anhydrase VIII                                          | <i>CA8</i>    | <a href="#">515918</a> | 0006730 // one-carbon compound metabolic process // inferred from electronic annotation                                                                                                                    | 7.66E-08 | 0.31        | Down       |
| proline/arginine-rich end leucine-rich                           | <i>PRELP</i>  | <a href="#">282000</a> | ---                                                                                                                                                                                                        | 2.12E-08 | 0.31        | Down       |

| Gene Title                                                                       | Gene Symbol     | Entrez Gene               | Putative Function                                                                                                                                                                                                                                               | P-value  | Fold Effect | Regulation |
|----------------------------------------------------------------------------------|-----------------|---------------------------|-----------------------------------------------------------------------------------------------------------------------------------------------------------------------------------------------------------------------------------------------------------------|----------|-------------|------------|
| repeat protein                                                                   |                 |                           |                                                                                                                                                                                                                                                                 |          |             |            |
| H19, imprinted maternally expressed untranslated mRNA                            | <i>H19</i>      | <a href="#">100126192</a> | ---                                                                                                                                                                                                                                                             | 0.00275  | 0.31        | Down       |
| solute carrier family 16, member 2 (monocarboxylic acid transporter 8)           | <i>SLC16A2</i>  | <a href="#">535872</a>    | 0006810 // transport // inferred from electronic annotation                                                                                                                                                                                                     | 5.02E-09 | 0.32        | Down       |
| sphingosine kinase 2                                                             | <i>SPHK2</i>    | <a href="#">533103</a>    | 0007205 // activation of protein kinase C activity // inferred from electronic annotation                                                                                                                                                                       | 2.38E-13 | 0.32        | Down       |
| protein phosphatase 1, regulatory (inhibitor) subunit 16B                        | <i>PPP1R16B</i> | <a href="#">282091</a>    | ---                                                                                                                                                                                                                                                             | 1.50E-09 | 0.32        | Down       |
| matrix-remodelling associated 8                                                  | <i>MXRA8</i>    | <a href="#">522392</a>    | ---                                                                                                                                                                                                                                                             | 3.21E-10 | 0.32        | Down       |
| fibroblast activation protein, alpha                                             | <i>FAP</i>      | <a href="#">508882</a>    | 0006508 // proteolysis // inferred from electronic annotation                                                                                                                                                                                                   | 2.21E-09 | 0.33        | Down       |
| glycosylphosphatidylinositol anchored high density lipoprotein binding protein 1 | <i>GPIHBP1</i>  | <a href="#">512826</a>    | ---                                                                                                                                                                                                                                                             | 3.00E-07 | 0.33        | Down       |
| myostatin                                                                        | <i>MSTN</i>     | <a href="#">281187</a>    | 0007179 // transforming growth factor beta receptor signaling pathway // inferred from electronic annotation /// 0040007 // growth // inferred from electronic annotation /// 0045941 // positive regulation of transcription // inferred from electronic annot | 7.89E-06 | 0.33        | Down       |
| SRY (sex determining region Y)-box 18                                            | <i>SOX18</i>    | <a href="#">519439</a>    | 0006355 // regulation of transcription, DNA-dependent // inferred from                                                                                                                                                                                          | 5.32E-07 | 0.33        | Down       |

| Gene Title                                   | Gene Symbol         | Entrez Gene               | Putative Function                                                                                                                                                                                                                                               | P-value  | Fold Effect | Regulation |
|----------------------------------------------|---------------------|---------------------------|-----------------------------------------------------------------------------------------------------------------------------------------------------------------------------------------------------------------------------------------------------------------|----------|-------------|------------|
|                                              |                     |                           | electronic annotation                                                                                                                                                                                                                                           |          |             |            |
| Similar to MPIF-1                            | <i>LOC508666</i>    | <a href="#">508666</a>    | ---                                                                                                                                                                                                                                                             | 5.87E-07 | 0.34        | Down       |
| Tetraspanin 2                                | <i>TSPAN2</i>       | <a href="#">539001</a>    | ---                                                                                                                                                                                                                                                             | 2.76E-05 | 0.34        | Down       |
| hypothetical protein LOC100125878            | <i>LOC100125878</i> | <a href="#">100125878</a> | ---                                                                                                                                                                                                                                                             | 8.19E-08 | 0.34        | Down       |
| RAC/CDC42 exchange factor                    | <i>GEFT</i>         | <a href="#">506075</a>    | 0035023 // regulation of Rho protein signal transduction // inferred from electronic annotation                                                                                                                                                                 | 9.61E-07 | 0.35        | Down       |
| transforming growth factor, beta 2           | <i>TGFB2</i>        | <a href="#">534069</a>    | 0000902 // cell morphogenesis // inferred from electronic annotation /// 0001501 // skeletal development // inferred from electronic annotation /// 0001568 // blood vessel development // inferred from electronic annotation /// 0001654 // eye development / | 8.76E-05 | 0.36        | Down       |
| LIM and cysteine-rich domains 1              | <i>LMCD1</i>        | <a href="#">540474</a>    | 0000122 // negative regulation of transcription from RNA polymerase II promoter // inferred from electronic annotation                                                                                                                                          | 1.09E-07 | 0.36        | Down       |
| Chromosome 14 open reading frame 37 ortholog | <i>C10H14orf37</i>  | <a href="#">508562</a>    | ---                                                                                                                                                                                                                                                             | 0.000116 | 0.36        | Down       |
| metallophosphoesterase domain containing 2   | <i>MPPED2</i>       | <a href="#">540914</a>    | ---                                                                                                                                                                                                                                                             | 7.99E-07 | 0.36        | Down       |

| Gene Title                                                                         | Gene Symbol    | Entrez Gene            | Putative Function                                                                                                                                                                                                                                               | P-value  | Fold Effect | Regulation |
|------------------------------------------------------------------------------------|----------------|------------------------|-----------------------------------------------------------------------------------------------------------------------------------------------------------------------------------------------------------------------------------------------------------------|----------|-------------|------------|
| CD300 molecule-like family member g                                                | <i>CD300LG</i> | <a href="#">615388</a> | 0006955 // immune response // inferred from electronic annotation                                                                                                                                                                                               | 3.68E-05 | 0.36        | Down       |
| fatty acid binding protein 7, brain                                                | <i>FABP7</i>   | <a href="#">777787</a> | 0006810 // transport // inferred from electronic annotation                                                                                                                                                                                                     | 7.99E-06 | 0.36        | Down       |
| platelet/endothelial cell adhesion molecule (CD31 antigen)                         | <i>PECAM1</i>  | <a href="#">282303</a> | 0007155 // cell adhesion // inferred from electronic annotation                                                                                                                                                                                                 | 9.44E-08 | 0.37        | Down       |
| potassium large conductance calcium-activated channel, subfamily M, alpha member 1 | <i>KCNMA1</i>  | <a href="#">282573</a> | 0006810 // transport // inferred from electronic annotation /// 0006811 // ion transport // inferred from electronic annotation /// 0006813 // potassium ion transport // inferred from electronic annotation /// 0008152 // metabolic process // inferred from | 0.00036  | 0.37        | Down       |
| urocanase domain containing 1                                                      | <i>UROCI</i>   | <a href="#">528246</a> | 0006548 // histidine catabolic process // inferred from electronic annotation                                                                                                                                                                                   | 3.19E-11 | 0.37        | Down       |
| cAMP responsive element binding protein 3-like 4                                   | <i>CREB3L4</i> | <a href="#">529566</a> | 0006355 // regulation of transcription, DNA-dependent // inferred from electronic annotation                                                                                                                                                                    | 3.60E-06 | 0.37        | Down       |
| calponin 1, basic, smooth muscle                                                   | <i>CNN1</i>    | <a href="#">534583</a> | 0031032 // actomyosin structure organization and biogenesis // inferred from electronic annotation                                                                                                                                                              | 1.16E-06 | 0.37        | Down       |
| corticotropin releasing hormone binding protein                                    | <i>CRHBP</i>   | <a href="#">540087</a> | ---                                                                                                                                                                                                                                                             | 0.000229 | 0.37        | Down       |

| Gene Title                                                    | Gene Symbol    | Entrez Gene            | Putative Function                                                                                                                                                                                                                                               | P-value  | Fold Effect | Regulation |
|---------------------------------------------------------------|----------------|------------------------|-----------------------------------------------------------------------------------------------------------------------------------------------------------------------------------------------------------------------------------------------------------------|----------|-------------|------------|
| cadherin 13, H-cadherin (heart)                               | <i>CDH13</i>   | <a href="#">512302</a> | 0001938 // positive regulation of endothelial cell proliferation // inferred from electronic annotation /// 0001954 // positive regulation of cell-matrix adhesion // inferred from electronic annotation /// 0002040 // sprouting angiogenesis // inferred fro | 7.91E-06 | 0.37        | Down       |
| integrin, alpha 7                                             | <i>ITGA7</i>   | <a href="#">506953</a> | ---                                                                                                                                                                                                                                                             | 0.001001 | 0.37        | Down       |
| leucine rich repeat containing 17                             | <i>LRRC17</i>  | <a href="#">777690</a> | ---                                                                                                                                                                                                                                                             | 1.34E-08 | 0.38        | Down       |
| hemicentin 1                                                  | <i>HMCN1</i>   | <a href="#">521326</a> | ---                                                                                                                                                                                                                                                             | 1.05E-07 | 0.38        | Down       |
| cartilage associated protein                                  | <i>CRTAP</i>   | <a href="#">540924</a> | ---                                                                                                                                                                                                                                                             | 1.29E-08 | 0.38        | Down       |
| V-kit Hardy-Zuckerman 4 feline sarcoma viral oncogene homolog | <i>KIT</i>     | <a href="#">280832</a> | 0006468 // protein amino acid phosphorylation // inferred from electronic annotation /// 0007169 // transmembrane receptor protein tyrosine kinase signaling pathway // inferred from electronic annotation /// 0007243 // protein kinase cascade // inferred f | 0.001176 | 0.39        | Down       |
| reticulocalbin 3, EF-hand calcium binding domain              | <i>RCN3</i>    | <a href="#">522073</a> | ---                                                                                                                                                                                                                                                             | 1.02E-05 | 0.39        | Down       |
| collagen, type XII, alpha 1                                   | <i>COL12A1</i> | <a href="#">359712</a> | 0006817 // phosphate transport // inferred from electronic annotation /// 0007155 // cell adhesion // inferred from electronic annotation                                                                                                                       | 9.29E-06 | 0.39        | Down       |

| Gene Title                                                                         | Gene Symbol      | Entrez Gene            | Putative Function                                                                                                                                                                                                                                                  | P-value  | Fold Effect | Regulation |
|------------------------------------------------------------------------------------|------------------|------------------------|--------------------------------------------------------------------------------------------------------------------------------------------------------------------------------------------------------------------------------------------------------------------|----------|-------------|------------|
| Transmembrane protease, serine 2                                                   | <i>TMPRSS2</i>   | <a href="#">511037</a> | 0006508 // proteolysis // inferred from electronic annotation                                                                                                                                                                                                      | 0.003658 | 0.39        | Down       |
| similar to nonclathrin coat protein zeta-COP                                       | <i>LOC616222</i> | <a href="#">616222</a> | ---                                                                                                                                                                                                                                                                | 5.01E-09 | 0.40        | Down       |
| sideroflexin 3                                                                     | <i>SFXN3</i>     | <a href="#">511755</a> | 0006812 // cation transport // inferred from electronic annotation                                                                                                                                                                                                 | 8.22E-09 | 0.40        | Down       |
| butyrylcholinesterase                                                              | <i>BCHE</i>      | <a href="#">534616</a> | ---                                                                                                                                                                                                                                                                | 3.38E-07 | 0.41        | Down       |
| versican                                                                           | <i>VCAN</i>      | <a href="#">282662</a> | 0007155 // cell adhesion // inferred from electronic annotation ///<br>0007507 // heart development // inferred from electronic annotation                                                                                                                         | 0.003346 | 0.41        | Down       |
| coiled-coil domain containing 80                                                   | <i>CCDC80</i>    | <a href="#">515235</a> | ---                                                                                                                                                                                                                                                                | 5.28E-08 | 0.41        | Down       |
| junctophilin 4                                                                     | <i>JPH4</i>      | <a href="#">781073</a> | ---                                                                                                                                                                                                                                                                | 5.27E-05 | 0.41        | Down       |
| potassium large conductance calcium-activated channel, subfamily M, alpha member 1 | <i>KCNMA1</i>    | <a href="#">282573</a> | 0006810 // transport // inferred from electronic annotation /// 0006811 // ion transport // inferred from electronic annotation /// 0006813 // potassium ion transport // inferred from electronic annotation ///<br>0008152 // metabolic process // inferred from | 1.08E-06 | 0.41        | Down       |
| similar to CMP-N-acetylneuraminic acid hydroxylase                                 | <i>LOC537017</i> | <a href="#">537017</a> | ---                                                                                                                                                                                                                                                                | 0.000737 | 0.41        | Down       |

| Gene Title                                                                                                                                  | Gene Symbol      | Entrez Gene            | Putative Function                                                                                                                          | P-value  | Fold Effect | Regulation |
|---------------------------------------------------------------------------------------------------------------------------------------------|------------------|------------------------|--------------------------------------------------------------------------------------------------------------------------------------------|----------|-------------|------------|
| Nephronectin                                                                                                                                | <i>NPNT</i>      | <a href="#">513362</a> | ---                                                                                                                                        | 5.10E-09 | 0.41        | Down       |
| zinc finger protein 521                                                                                                                     | <i>ZNF521</i>    | <a href="#">538792</a> | 0045449 // regulation of transcription<br>// inferred from electronic annotation                                                           | 6.47E-08 | 0.41        | Down       |
| reticulocalbin 3, EF-hand calcium binding domain                                                                                            | <i>RCN3</i>      | <a href="#">522073</a> | ---                                                                                                                                        | 8.85E-09 | 0.41        | Down       |
| LAMA-like protein 1                                                                                                                         | <i>LOC317710</i> | <a href="#">317710</a> | 0016042 // lipid catabolic process // inferred from electronic annotation                                                                  | 1.65E-06 | 0.41        | Down       |
| hypothetical LOC515128                                                                                                                      | <i>LOC515128</i> | <a href="#">515128</a> | ---                                                                                                                                        | 5.07E-07 | 0.42        | Down       |
| C20orf142-like                                                                                                                              | <i>LOC518159</i> | <a href="#">518159</a> | ---                                                                                                                                        | 4.18E-08 | 0.42        | Down       |
| nephroblastoma overexpressed                                                                                                                | <i>NOV</i>       | <a href="#">505727</a> | 0001558 // regulation of cell growth // inferred from electronic annotation                                                                | 0.009023 | 0.42        | Down       |
| sema domain, seven thrombospondin repeats (type 1 and type 1-like), transmembrane domain (TM) and short cytoplasmic domain, (semaphorin) 5A | <i>SEMA5A</i>    | <a href="#">506636</a> | ---                                                                                                                                        | 0.001504 | 0.42        | Down       |
| fibulin 5                                                                                                                                   | <i>FBLN5</i>     | <a href="#">535185</a> | 0007155 // cell adhesion // inferred from electronic annotation ///<br>0007596 // blood coagulation // inferred from electronic annotation | 8.60E-07 | 0.42        | Down       |
| Similar to KIAA1568 protein                                                                                                                 | <i>LOC781194</i> | <a href="#">781194</a> | ---                                                                                                                                        | 3.65E-06 | 0.42        | Down       |



| Gene Title                                                         | Gene Symbol      | Entrez Gene            | Putative Function                                                 | P-value  | Fold Effect | Regulation |
|--------------------------------------------------------------------|------------------|------------------------|-------------------------------------------------------------------|----------|-------------|------------|
| microtubule-associated protein 1B                                  | <i>MAP1B</i>     | <a href="#">514739</a> | 0006457 // protein folding // inferred from electronic annotation | 0.00506  | 0.43        | Down       |
| similar to nonclathrin coat protein zeta-COP                       | <i>LOC616222</i> | <a href="#">616222</a> | ---                                                               | 1.40E-09 | 0.43        | Down       |
| guanidinoacetate N-methyltransferase                               | <i>GAMT</i>      | <a href="#">515270</a> | ---                                                               | 1.95E-12 | 0.43        | Down       |
| nitric oxide synthase 1 (neuronal) adaptor protein                 | <i>NOS1AP</i>    | <a href="#">783439</a> | ---                                                               | 5.49E-07 | 0.43        | Down       |
| aquaporin 1 (Colton blood group)                                   | <i>AQP1</i>      | <a href="#">282653</a> | 0006810 // transport // inferred from electronic annotation       | 0.00163  | 0.43        | Down       |
| GTF2I repeat domain containing 1                                   | <i>GTF2IRD1</i>  | <a href="#">507792</a> | ---                                                               | 9.41E-06 | 0.43        | Down       |
| hypothetical LOC535165                                             | <i>LOC535165</i> | <a href="#">535165</a> | ---                                                               | 5.63E-07 | 0.43        | Down       |
| membrane metallo-endopeptidase                                     | <i>MME</i>       | <a href="#">536741</a> | ---                                                               | 0.000832 | 0.44        | Down       |
| myocilin, trabecular meshwork inducible glucocorticoid response    | <i>MYOC</i>      | <a href="#">281342</a> | ---                                                               | 8.12E-07 | 0.44        | Down       |
| FK506 binding protein 10, 65 kDa                                   | <i>FKBP10</i>    | <a href="#">535310</a> | 0006457 // protein folding // inferred from electronic annotation | 7.88E-06 | 0.44        | Down       |
| speckle-type POZ protein                                           | <i>SPOP</i>      | <a href="#">530618</a> | 0006512 // ubiquitin cycle // inferred from electronic annotation | 5.79E-07 | 0.44        | Down       |
| similar to transmembrane and tetratricopeptide repeat containing 2 | <i>LOC781126</i> | <a href="#">781126</a> | ---                                                               | 2.13E-06 | 0.44        | Down       |

| Gene Title                                                              | Gene Symbol     | Entrez Gene            | Putative Function                                                                                                                            | P-value  | Fold Effect | Regulation |
|-------------------------------------------------------------------------|-----------------|------------------------|----------------------------------------------------------------------------------------------------------------------------------------------|----------|-------------|------------|
| sarcoglycan, epsilon                                                    | <i>Sgce</i>     | <a href="#">407209</a> | ---                                                                                                                                          | 7.59E-07 | 0.44        | Down       |
| protein tyrosine phosphatase, receptor type, D                          | <i>PTPRD</i>    | <a href="#">532751</a> | ---                                                                                                                                          | 2.19E-07 | 0.44        | Down       |
| G protein-coupled receptor 153                                          | <i>GPR153</i>   | <a href="#">518906</a> | ---                                                                                                                                          | 4.57E-07 | 0.44        | Down       |
| transmembrane protein 88                                                | <i>TMEM88</i>   | <a href="#">507172</a> | ---                                                                                                                                          | 1.34E-08 | 0.45        | Down       |
| Hypothetical protein LOC784675                                          | <i>KIAA1462</i> | <a href="#">784675</a> | ---                                                                                                                                          | 1.18E-05 | 0.45        | Down       |
| hydrogen voltage-gated channel 1                                        | <i>HVCNI</i>    | <a href="#">616570</a> | ---                                                                                                                                          | 1.99E-08 | 0.45        | Down       |
| protein phosphatase 2 (formerly 2A), regulatory subunit B, beta isoform | <i>PPP2R2B</i>  | <a href="#">509290</a> | 0007165 // signal transduction // inferred from electronic annotation                                                                        | 1.37E-07 | 0.45        | Down       |
| WAP four-disulfide core domain 1                                        | <i>WFDC1</i>    | <a href="#">505366</a> | ---                                                                                                                                          | 4.28E-06 | 0.45        | Down       |
| TIMP metalloproteinase inhibitor 4                                      | <i>TIMP4</i>    | <a href="#">317694</a> | ---                                                                                                                                          | 0.00045  | 0.46        | Down       |
| Collagen, type XI, alpha 1                                              | <i>COL11A1</i>  | <a href="#">287013</a> | 0006817 // phosphate transport // inferred from electronic annotation ///<br>0007155 // cell adhesion // inferred from electronic annotation | 0.00684  | 0.46        | Down       |
| myotubularin related protein 9                                          | <i>MTMR9</i>    | <a href="#">521746</a> | 0046839 // phospholipid dephosphorylation // inferred from electronic annotation                                                             | 3.04E-07 | 0.46        | Down       |
| lysozyme (renal amyloidosis)                                            | <i>LYZ</i>      | <a href="#">777776</a> | 0008152 // metabolic process // inferred from electronic annotation ///<br>0016998 // cell wall catabolic process                            | 0.004467 | 0.46        | Down       |

| Gene Title                                        | Gene Symbol           | Entrez Gene            | Putative Function                                                                                                                                         | P-value  | Fold Effect | Regulation |
|---------------------------------------------------|-----------------------|------------------------|-----------------------------------------------------------------------------------------------------------------------------------------------------------|----------|-------------|------------|
|                                                   |                       |                        | // inferred from electronic annotation<br>/// 0019835 // cytolysis // inferred<br>from electronic annotation ///<br>0042742 // defense response to bacter |          |             |            |
| carboxypeptidase E                                | <i>CPE</i>            | <a href="#">280753</a> | 0006508 // proteolysis // inferred from<br>electronic annotation /// 0030070 //<br>insulin processing // inferred from<br>electronic annotation           | 1.39E-05 | 0.46        | Down       |
| similar to polydom                                | <i>LOC78128<br/>2</i> | <a href="#">781282</a> | 0007155 // cell adhesion // inferred<br>from electronic annotation                                                                                        | 0.002868 | 0.46        | Down       |
| plexin domain containing 2                        | <i>PLXDC2</i>         | <a href="#">515731</a> | 0007275 // multicellular organismal<br>development // inferred from<br>electronic annotation                                                              | 0.001097 | 0.47        | Down       |
| Usher syndrome 1C binding protein 1               | <i>USHBP1</i>         | <a href="#">768083</a> | ---                                                                                                                                                       | 1.93E-07 | 0.47        | Down       |
| protein tyrosine phosphatase, receptor<br>type, D | <i>PTPRD</i>          | <a href="#">532751</a> | ---                                                                                                                                                       | 1.57E-08 | 0.47        | Down       |
| membrane metallo-endopeptidase                    | <i>MME</i>            | <a href="#">536741</a> | ---                                                                                                                                                       | 0.002086 | 0.47        | Down       |
| spleen trypsin inhibitor                          | <i>LOC40410<br/>3</i> | <a href="#">404103</a> | ---                                                                                                                                                       | 0.00752  | 0.47        | Down       |
| polo-like kinase 2 (Drosophila)                   | <i>PLK2</i>           | <a href="#">539449</a> | 0006468 // protein amino acid<br>phosphorylation // inferred from<br>electronic annotation                                                                | 1.72E-09 | 0.47        | Down       |
| Kruppel-like factor 11                            | <i>KLF11</i>          | <a href="#">616730</a> | ---                                                                                                                                                       | 0.000104 | 0.47        | Down       |

| Gene Title                                                                              | Gene Symbol    | Entrez Gene            | Putative Function                                                                                                                                               | P-value  | Fold Effect | Regulation |
|-----------------------------------------------------------------------------------------|----------------|------------------------|-----------------------------------------------------------------------------------------------------------------------------------------------------------------|----------|-------------|------------|
| Calcium channel, voltage-dependent, T type, alpha 1G subunit                            | <i>CACNA1G</i> | <a href="#">282411</a> | 0006811 // ion transport // inferred from electronic annotation ///<br>0006816 // calcium ion transport // inferred from electronic annotation                  | 4.11E-05 | 0.47        | Down       |
| tripartite motif-containing 2                                                           | <i>TRIM2</i>   | <a href="#">538617</a> | ---                                                                                                                                                             | 0.001435 | 0.48        | Down       |
| insulin-like growth factor 1 (somatomedin C)                                            | <i>IGF1</i>    | <a href="#">281239</a> | ---                                                                                                                                                             | 0.002449 | 0.48        | Down       |
| Cyclin-dependent kinase inhibitor 1C (p57, Kip2)                                        | <i>CDKN1C</i>  | <a href="#">510972</a> | 0007050 // cell cycle arrest // inferred from electronic annotation                                                                                             | 8.06E-08 | 0.48        | Down       |
| phosphoglucomutase 5                                                                    | <i>PGM5</i>    | <a href="#">785045</a> | 0005975 // carbohydrate metabolic process // inferred from electronic annotation /// 0006508 // proteolysis // inferred from electronic annotation              | 1.10E-07 | 0.48        | Down       |
| CD59 molecule, complement regulatory protein                                            | <i>CD59</i>    | <a href="#">505574</a> | ---                                                                                                                                                             | 7.46E-05 | 0.48        | Down       |
| UDP-N-acetyl-alpha-D-galactosamine:polypeptide N-acetylgalactosaminyltransferase-like 1 | <i>GALNTL1</i> | <a href="#">526331</a> | ---                                                                                                                                                             | 3.06E-06 | 0.48        | Down       |
| S-adenosylhomocysteine hydrolase-like 2                                                 | <i>AHCYL2</i>  | <a href="#">532836</a> | 0006730 // one-carbon compound metabolic process // inferred from electronic annotation /// 0008152 // metabolic process // inferred from electronic annotation | 1.38E-05 | 0.48        | Down       |
| Collagen, type V, alpha 3                                                               | <i>COL5A3</i>  | <a href="#">507881</a> | 0007155 // cell adhesion // inferred                                                                                                                            | 1.25E-05 | 0.49        | Down       |

| Gene Title                                     | Gene Symbol   | Entrez Gene            | Putative Function                                                                                                                                                              | P-value  | Fold Effect | Regulation |
|------------------------------------------------|---------------|------------------------|--------------------------------------------------------------------------------------------------------------------------------------------------------------------------------|----------|-------------|------------|
|                                                |               |                        | from electronic annotation                                                                                                                                                     |          |             |            |
| Neurotrophic tyrosine kinase, receptor, type 2 | <i>NTRK2</i>  | <a href="#">505824</a> | ---                                                                                                                                                                            | 0.003821 | 0.49        | Down       |
| Chromobox homolog 6                            | <i>CBX6</i>   | <a href="#">513830</a> | 0006333 // chromatin assembly or disassembly // inferred from electronic annotation                                                                                            | 2.41E-09 | 0.49        | Down       |
| collagen, type IV, alpha 5 (Alport syndrome)   | <i>COL4A5</i> | <a href="#">511602</a> | 0006817 // phosphate transport // inferred from electronic annotation                                                                                                          | 2.20E-06 | 0.49        | Down       |
| interleukin 33                                 | <i>IL33</i>   | <a href="#">507054</a> | ---                                                                                                                                                                            | 0.001472 | 0.49        | Down       |
| neuroligin 3                                   | <i>NLGN3</i>  | <a href="#">511251</a> | 0007155 // cell adhesion // inferred from electronic annotation                                                                                                                | 3.91E-07 | 0.49        | Down       |
| collagen, type IV, alpha 4                     | <i>COL4A4</i> | <a href="#">407107</a> | 0006817 // phosphate transport // inferred from electronic annotation /// 0007155 // cell adhesion // inferred from electronic annotation                                      | 0.001911 | 0.49        | Down       |
| nestin                                         | <i>NES</i>    | <a href="#">522383</a> | 0006886 // intracellular protein transport // inferred from electronic annotation /// 0006888 // ER to Golgi vesicle-mediated transport // inferred from electronic annotation | 5.02E-06 | 0.49        | Down       |
| phosphofructokinase, muscle                    | <i>PFKM</i>   | <a href="#">506544</a> | 0006096 // glycolysis // inferred from electronic annotation                                                                                                                   | 7.35E-08 | 0.49        | Down       |
| secretion regulating guanine nucleotide        | <i>SERGEF</i> | <a href="#">534377</a> | 0050709 // negative regulation of protein secretion // inferred from                                                                                                           | 6.44E-09 | 0.49        | Down       |

| Gene Title                                            | Gene Symbol                 | Entrez Gene            | Putative Function                                                                                                                                                                                                                                               | P-value  | Fold Effect | Regulation |
|-------------------------------------------------------|-----------------------------|------------------------|-----------------------------------------------------------------------------------------------------------------------------------------------------------------------------------------------------------------------------------------------------------------|----------|-------------|------------|
| exchange factor                                       |                             |                        | electronic annotation                                                                                                                                                                                                                                           |          |             |            |
| similar to SMAP-2b                                    | <i>MGC14887</i><br><i>1</i> | <a href="#">615490</a> | ---                                                                                                                                                                                                                                                             | 0.000412 | 0.49        | Down       |
| wingless-type MMTV integration site family, member 2B | <i>WNT2B</i>                | <a href="#">445420</a> | 0007223 // Wnt receptor signaling pathway, calcium modulating pathway // inferred from electronic annotation /// 0007275 // multicellular organismal development // inferred from electronic annotation /// 0016055 // Wnt receptor signaling pathway // inferr | 0.002584 | 0.49        | Down       |
| surfactant associated protein G                       | <i>SFTPG</i>                | <a href="#">616978</a> | ---                                                                                                                                                                                                                                                             | 0.000106 | 0.49        | Down       |
| S-adenosylhomocysteine hydrolase-like 2               | <i>AHCYL2</i>               | <a href="#">532836</a> | 0006730 // one-carbon compound metabolic process // inferred from electronic annotation /// 0008152 // metabolic process // inferred from electronic annotation                                                                                                 | 0.000111 | 0.49        | Down       |
| hydroxysteroid (11-beta) dehydrogenase 1-like         | <i>HSD11B1L</i>             | <a href="#">404546</a> | 0008152 // metabolic process // inferred from electronic annotation                                                                                                                                                                                             | 2.30E-05 | 0.49        | Down       |
| phospholipase C-like 2                                | <i>PLCL2</i>                | <a href="#">510408</a> | 0006629 // lipid metabolic process // inferred from electronic annotation /// 0007242 // intracellular signaling cascade // inferred from electronic annotation                                                                                                 | 2.60E-06 | 0.49        | Down       |
| sal-like 2 (Drosophila)                               | <i>SALL2</i>                | <a href="#">527574</a> | ---                                                                                                                                                                                                                                                             | 1.71E-06 | 0.49        | Down       |

| Gene Title                                            | Gene Symbol      | Entrez Gene            | Putative Function                                                                                                                                                                                                                                               | P-value  | Fold Effect | Regulation |
|-------------------------------------------------------|------------------|------------------------|-----------------------------------------------------------------------------------------------------------------------------------------------------------------------------------------------------------------------------------------------------------------|----------|-------------|------------|
| hairy and enhancer of split 1, (Drosophila)           | <i>HES1</i>      | <a href="#">539547</a> | 0000122 // negative regulation of transcription from RNA polymerase II promoter // inferred from electronic annotation /// 0001889 // liver development // inferred from electronic annotation /// 0006350 // transcription // inferred from electronic annotat | 1.10E-06 | 0.49        | Down       |
| histone H4-like                                       | <i>LOC617875</i> | <a href="#">617875</a> | 0006334 // nucleosome assembly // inferred from electronic annotation                                                                                                                                                                                           | 5.00E-10 | 0.50        | Down       |
| D component of complement (adipsin)                   | <i>DF</i>        | <a href="#">505647</a> | 0006508 // proteolysis // inferred from electronic annotation /// 0006955 // immune response // inferred from electronic annotation /// 0006957 // complement activation, alternative pathway // inferred from electronic annotation /// 0045087 // innate immu | 0.000305 | 0.50        | Down       |
| ADAM-like, decysin 1                                  | <i>ADAMDEC1</i>  | <a href="#">505890</a> | 0006508 // proteolysis // inferred from electronic annotation                                                                                                                                                                                                   | 0.002581 | 0.50        | Down       |
| similar to type VII collagen                          | <i>LOC507133</i> | <a href="#">507133</a> | 0006817 // phosphate transport // inferred from electronic annotation                                                                                                                                                                                           | 1.89E-05 | 0.50        | Down       |
| Cysteinyl-tRNA synthetase 2, mitochondrial (putative) | <i>CARS2</i>     | <a href="#">506598</a> | 0006412 // translation // inferred from electronic annotation /// 0006418 // tRNA aminoacylation for protein translation // inferred from electronic annotation /// 0006423 // cysteinyl-tRNA aminoacylation // inferred from                                   | 0.001262 | 0.50        | Down       |

| Gene Title                                                                       | Gene Symbol      | Entrez Gene            | Putative Function                                                                                                                                                                               | P-value  | Fold Effect | Regulation |
|----------------------------------------------------------------------------------|------------------|------------------------|-------------------------------------------------------------------------------------------------------------------------------------------------------------------------------------------------|----------|-------------|------------|
|                                                                                  |                  |                        | electronic annotation                                                                                                                                                                           |          |             |            |
| WNT1 inducible signaling pathway protein 2                                       | <i>WISP2</i>     | <a href="#">534658</a> | 0001558 // regulation of cell growth // inferred from electronic annotation                                                                                                                     | 1.99E-05 | 0.50        | Down       |
| actin, alpha 2, smooth muscle, aorta                                             | <i>ACTA2</i>     | <a href="#">515610</a> | 0030240 // muscle thin filament assembly // inferred from sequence or structural similarity /// 0048741 // skeletal muscle fiber development // inferred from sequence or structural similarity | 0.003231 | 0.50        | Down       |
| hypothetical LOC615685                                                           | <i>LOC615685</i> | <a href="#">615685</a> | ---                                                                                                                                                                                             | 3.37E-09 | 0.50        | Down       |
| MFNG O-fucosylpeptide 3-beta-N-acetylglucosaminyltransferase                     | <i>MFNG</i>      | <a href="#">505267</a> | ---                                                                                                                                                                                             | 5.18E-09 | 0.50        | Down       |
| hypothetical LOC615685                                                           | <i>LOC615685</i> | <a href="#">615685</a> | ---                                                                                                                                                                                             | 2.62E-07 | 0.50        | Down       |
| keratin 10 (epidermolytic hyperkeratosis; keratosis palmaris et plantaris)       | <i>KRT10</i>     | <a href="#">281888</a> | ---                                                                                                                                                                                             | 1.89E-07 | 0.50        | Down       |
| hypothetical protein LOC783163                                                   | <i>LOC783163</i> | <a href="#">783163</a> | ---                                                                                                                                                                                             | 3.36E-08 | 0.50        | Down       |
| pleckstrin homology-like domain, family B, member 2                              | <i>PHLDB2</i>    | <a href="#">509784</a> | ---                                                                                                                                                                                             | 0.000279 | 0.50        | Down       |
| Ctr9, Paf1/RNA polymerase II complex component, homolog ( <i>S. cerevisiae</i> ) | <i>CTR9</i>      | <a href="#">534265</a> | ---                                                                                                                                                                                             | 4.36E-07 | 0.51        | Down       |



| Gene Title                                                  | Gene Symbol      | Entrez Gene            | Putative Function                                                                                                                                                                                                                                               | P-value  | Fold Effect | Regulation |
|-------------------------------------------------------------|------------------|------------------------|-----------------------------------------------------------------------------------------------------------------------------------------------------------------------------------------------------------------------------------------------------------------|----------|-------------|------------|
| chromobox homolog 6                                         | <i>CBX6</i>      | <a href="#">513830</a> | 0006333 // chromatin assembly or disassembly // inferred from electronic annotation                                                                                                                                                                             | 2.46E-09 | 0.51        | Down       |
| hypothetical LOC538778                                      | <i>LOC538778</i> | <a href="#">538778</a> | ---                                                                                                                                                                                                                                                             | 0.005279 | 0.51        | Down       |
| Carbohydrate (N-acetylgalactosamine 4-0) sulfotransferase 9 | <i>CHST9</i>     | <a href="#">525909</a> | ---                                                                                                                                                                                                                                                             | 1.83E-06 | 0.51        | Down       |
| tenascin XB                                                 | <i>TNXB</i>      | <a href="#">282654</a> | 0007155 // cell adhesion // inferred from direct assay /// 0007165 // signal transduction // inferred from electronic annotation /// 0030036 // actin cytoskeleton organization and biogenesis // inferred from mutant phenotype /// 0030198 // extracellular m | 2.15E-05 | 0.51        | Down       |
| bone morphogenetic protein 2                                | <i>BMP2</i>      | <a href="#">615037</a> | 0040007 // growth // inferred from electronic annotation                                                                                                                                                                                                        | 2.31E-07 | 0.51        | Down       |
| microfibrillar-associated protein 4                         | <i>MFAP4</i>     | <a href="#">286766</a> | 0007155 // cell adhesion // inferred from electronic annotation /// 0007165 // signal transduction // inferred from electronic annotation                                                                                                                       | 8.07E-05 | 0.51        | Down       |
| dispatched homolog 1 (Drosophila)                           | <i>DISP1</i>     | <a href="#">534637</a> | ---                                                                                                                                                                                                                                                             | 3.30E-05 | 0.51        | Down       |
| CXXC finger 5                                               | <i>CXXC5</i>     | <a href="#">538485</a> | ---                                                                                                                                                                                                                                                             | 1.94E-08 | 0.51        | Down       |
| breast carcinoma amplified sequence 4                       | <i>BCAS4</i>     | <a href="#">617710</a> | ---                                                                                                                                                                                                                                                             | 2.48E-08 | 0.51        | Down       |

| Gene Title                                                       | Gene Symbol         | Entrez Gene               | Putative Function                                                                            | P-value  | Fold Effect | Regulation |
|------------------------------------------------------------------|---------------------|---------------------------|----------------------------------------------------------------------------------------------|----------|-------------|------------|
| chromosome 12 open reading frame 57 ortholog                     | <i>C5H12ORF57</i>   | <a href="#">511545</a>    | ---                                                                                          | 5.84E-09 | 0.51        | Down       |
| hypothetical LOC511765                                           | <i>MGC137169</i>    | <a href="#">511765</a>    | ---                                                                                          | 5.23E-06 | 0.52        | Down       |
| CAP-GLY domain containing linker protein 3                       | <i>CLIP3</i>        | <a href="#">522965</a>    | ---                                                                                          | 1.76E-06 | 0.52        | Down       |
| muscle RAS oncogene homolog                                      | <i>MRAS</i>         | <a href="#">540803</a>    | 0007264 // small GTPase mediated signal transduction // inferred from electronic annotation  | 2.05E-10 | 0.52        | Down       |
| pyridoxal (pyridoxine, vitamin B6) phosphatase                   | <i>PDXP</i>         | <a href="#">506308</a>    | 0008152 // metabolic process // inferred from electronic annotation                          | 2.03E-06 | 0.52        | Down       |
| fasciculation and elongation protein zeta 1 (zygin I)            | <i>FEZ1</i>         | <a href="#">511751</a>    | ---                                                                                          | 7.57E-06 | 0.52        | Down       |
| secretogranin V (7B2 protein)                                    | <i>SCG5</i>         | <a href="#">508224</a>    | 0007218 // neuropeptide signaling pathway // inferred from electronic annotation             | 1.64E-05 | 0.52        | Down       |
| thymocyte selection-associated high mobility group box           | <i>TOX</i>          | <a href="#">525888</a>    | 0006355 // regulation of transcription, DNA-dependent // inferred from electronic annotation | 7.99E-05 | 0.52        | Down       |
| melanoma antigen family D, 4-like                                | <i>LOC100125231</i> | <a href="#">100125231</a> | ---                                                                                          | 3.98E-07 | 0.52        | Down       |
| UDP-GlcNAc:betaGal beta-1,3-N-acetylglucosaminyltransferase-like | <i>LOC614717</i>    | <a href="#">614717</a>    | 0006486 // protein amino acid glycosylation // inferred from                                 | 1.48E-07 | 0.52        | Down       |

| Gene Title                                          | Gene Symbol      | Entrez Gene            | Putative Function                                                                                                                                                                                                                                               | P-value  | Fold Effect | Regulation |
|-----------------------------------------------------|------------------|------------------------|-----------------------------------------------------------------------------------------------------------------------------------------------------------------------------------------------------------------------------------------------------------------|----------|-------------|------------|
|                                                     |                  |                        | electronic annotation                                                                                                                                                                                                                                           |          |             |            |
| claudin 10                                          | <i>CLDN10</i>    | <a href="#">506545</a> | ---                                                                                                                                                                                                                                                             | 0.002208 | 0.52        | Down       |
| Dihydropyrimidinase-like 3                          | <i>DPYSL3</i>    | <a href="#">509796</a> | ---                                                                                                                                                                                                                                                             | 4.26E-10 | 0.52        | Down       |
| ionized calcium binding adapter molecule 2          | <i>C9orf58</i>   | <a href="#">617493</a> | ---                                                                                                                                                                                                                                                             | 5.45E-06 | 0.52        | Down       |
| odd-skipped related 2 (Drosophila)                  | <i>OSR2</i>      | <a href="#">508692</a> | 0008284 // positive regulation of cell proliferation // inferred from electronic annotation /// 0048704 // embryonic skeletal morphogenesis // inferred from electronic annotation                                                                              | 0.00552  | 0.52        | Down       |
| cadherin 2, type 1, N-cadherin (neuronal)           | <i>CDH2</i>      | <a href="#">281062</a> | 0007155 // cell adhesion // inferred from electronic annotation /// 0007156 // homophilic cell adhesion // inferred from electronic annotation /// 0016339 // calcium-dependent cell-cell adhesion // inferred from electronic annotation /// 0016477 // cell m | 8.38E-05 | 0.52        | Down       |
| roundabout homolog 4, magic roundabout (Drosophila) | <i>ROBO4</i>     | <a href="#">783785</a> | ---                                                                                                                                                                                                                                                             | 0.000124 | 0.53        | Down       |
| hypothetical protein LOC788205                      | <i>LOC788205</i> | <a href="#">788205</a> | ---                                                                                                                                                                                                                                                             | 0.000712 | 0.53        | Down       |
| Hypothetical protein LOC781544                      | <i>LOC781544</i> | <a href="#">781544</a> | ---                                                                                                                                                                                                                                                             | 4.27E-08 | 0.53        | Down       |

| Gene Title                                                       | Gene Symbol    | Entrez Gene            | Putative Function                                                                                                                                                                  | P-value  | Fold Effect | Regulation |
|------------------------------------------------------------------|----------------|------------------------|------------------------------------------------------------------------------------------------------------------------------------------------------------------------------------|----------|-------------|------------|
| FXYP domain containing ion transport regulator 1 (phospholemman) | <i>FXYP1</i>   | <a href="#">616139</a> | 0006810 // transport // inferred from electronic annotation /// 0006811 // ion transport // inferred from electronic annotation                                                    | 1.15E-09 | 0.53        | Down       |
| Intestinal cell (MAK-like) kinase                                | <i>ICK</i>     | <a href="#">506286</a> | 0006468 // protein amino acid phosphorylation // inferred from electronic annotation                                                                                               | 0.000562 | 0.53        | Down       |
| leprecan-like 1                                                  | <i>LEPREL1</i> | <a href="#">511799</a> | 0019538 // protein metabolic process // inferred from electronic annotation                                                                                                        | 0.005077 | 0.53        | Down       |
| odd-skipped related 2 (Drosophila)                               | <i>OSR2</i>    | <a href="#">508692</a> | 0008284 // positive regulation of cell proliferation // inferred from electronic annotation /// 0048704 // embryonic skeletal morphogenesis // inferred from electronic annotation | 3.51E-06 | 0.53        | Down       |
| importin 11                                                      | <i>IPO11</i>   | <a href="#">538236</a> | 0000059 // protein import into nucleus, docking // inferred from electronic annotation /// 0006886 // intracellular protein transport // inferred from electronic annotation       | 3.58E-06 | 0.53        | Down       |
| NFKB inhibitor interacting Ras-like 1                            | <i>NKIRAS1</i> | <a href="#">522875</a> | 0007264 // small GTPase mediated signal transduction // inferred from electronic annotation /// 0015031 // protein transport // inferred from electronic annotation                | 2.33E-06 | 0.53        | Down       |
| phosphoinositide-3-kinase, regulatory subunit 2 (beta)           | <i>PIK3R2</i>  | <a href="#">282308</a> | 0007165 // signal transduction // inferred from electronic annotation ///                                                                                                          | 1.49E-07 | 0.53        | Down       |

| Gene Title                                                                       | Gene Symbol   | Entrez Gene            | Putative Function                                                                                                                                                                                                                                               | P-value  | Fold Effect | Regulation |
|----------------------------------------------------------------------------------|---------------|------------------------|-----------------------------------------------------------------------------------------------------------------------------------------------------------------------------------------------------------------------------------------------------------------|----------|-------------|------------|
|                                                                                  |               |                        | 0019987 // negative regulation of anti-apoptosis // inferred from sequence or structural similarity                                                                                                                                                             |          |             |            |
| Paternally expressed 10                                                          | <i>PEG10</i>  | <a href="#">618138</a> | ---                                                                                                                                                                                                                                                             | 0.00223  | 0.53        | Down       |
| olfactomedin-like 3                                                              | <i>OLFML3</i> | <a href="#">505318</a> | ---                                                                                                                                                                                                                                                             | 1.70E-07 | 0.53        | Down       |
| von Willebrand factor A domain containing 1                                      | <i>VWAI</i>   | <a href="#">505917</a> | ---                                                                                                                                                                                                                                                             | 2.78E-06 | 0.53        | Down       |
| heat shock transcription factor 2 binding protein                                | <i>HSF2BP</i> | <a href="#">617142</a> | 0006950 // response to stress // inferred from electronic annotation                                                                                                                                                                                            | 6.14E-05 | 0.53        | Down       |
| lymphocyte-specific protein tyrosine kinase                                      | <i>LCK</i>    | <a href="#">508890</a> | 0006468 // protein amino acid phosphorylation // inferred from electronic annotation /// 0006882 // cellular zinc ion homeostasis // inferred from sequence or structural similarity /// 0006917 // induction of apoptosis // inferred from sequence or structu | 0.000289 | 0.53        | Down       |
| murine retrovirus integration site 1 homolog                                     | <i>MRVII</i>  | <a href="#">281918</a> | ---                                                                                                                                                                                                                                                             | 4.49E-05 | 0.53        | Down       |
| methionine sulfoxide reductase B3                                                | <i>MSRB3</i>  | <a href="#">617849</a> | ---                                                                                                                                                                                                                                                             | 3.54E-07 | 0.53        | Down       |
| 1-aminocyclopropane-1-carboxylate synthase homolog (Arabidopsis)(non-functional) | <i>ACCS</i>   | <a href="#">505649</a> | 0009058 // biosynthetic process // inferred from electronic annotation                                                                                                                                                                                          | 1.91E-05 | 0.53        | Down       |

| Gene Title                                               | Gene Symbol      | Entrez Gene            | Putative Function                                                                                                                                                                                                                    | P-value  | Fold Effect | Regulation |
|----------------------------------------------------------|------------------|------------------------|--------------------------------------------------------------------------------------------------------------------------------------------------------------------------------------------------------------------------------------|----------|-------------|------------|
| LIM domain binding 2                                     | <i>LDB2</i>      | <a href="#">617976</a> | 0007275 // multicellular organismal development // inferred from electronic annotation                                                                                                                                               | 4.79E-07 | 0.53        | Down       |
| solute carrier family 41, member 3                       | <i>SLC41A3</i>   | <a href="#">524085</a> | 0006812 // cation transport // inferred from electronic annotation                                                                                                                                                                   | 2.05E-06 | 0.53        | Down       |
| family with sequence similarity 92, member A1            | <i>FAM92A1</i>   | <a href="#">614070</a> | ---                                                                                                                                                                                                                                  | 1.59E-08 | 0.53        | Down       |
| nidogen 1                                                | <i>NID1</i>      | <a href="#">534319</a> | 0007160 // cell-matrix adhesion // inferred from electronic annotation ///<br>0008218 // bioluminescence // inferred from electronic annotation ///<br>0018298 // protein-chromophore linkage // inferred from electronic annotation | 5.99E-05 | 0.53        | Down       |
| solute carrier family 22, member 17                      | <i>SLC22A17</i>  | <a href="#">539848</a> | 0006810 // transport // inferred from electronic annotation                                                                                                                                                                          | 3.87E-05 | 0.53        | Down       |
| Polymerase (RNA) II (DNA directed) polypeptide A, 220kDa | <i>POLR2A</i>    | <a href="#">282312</a> | 0006350 // transcription // inferred from electronic annotation                                                                                                                                                                      | 5.96E-05 | 0.54        | Down       |
| jagged 2                                                 | <i>JAG2</i>      | <a href="#">517405</a> | ---                                                                                                                                                                                                                                  | 1.61E-05 | 0.54        | Down       |
| filamin A, alpha (actin binding protein 280)             | <i>FLNA</i>      | <a href="#">281165</a> | ---                                                                                                                                                                                                                                  | 2.29E-07 | 0.54        | Down       |
| hypothetical protein LOC781852                           | <i>LOC781852</i> | <a href="#">781852</a> | ---                                                                                                                                                                                                                                  | 8.37E-07 | 0.54        | Down       |

| Gene Title                                                                                                                                  | Gene Symbol      | Entrez Gene            | Putative Function                                                                               | P-value  | Fold Effect | Regulation |
|---------------------------------------------------------------------------------------------------------------------------------------------|------------------|------------------------|-------------------------------------------------------------------------------------------------|----------|-------------|------------|
| potassium channel tetramerisation domain containing 15                                                                                      | <i>KCTD15</i>    | <a href="#">512578</a> | 0006813 // potassium ion transport // inferred from electronic annotation                       | 4.33E-08 | 0.54        | Down       |
| ankylosis, progressive homolog (mouse)                                                                                                      | <i>ANKH</i>      | <a href="#">511800</a> | 0006817 // phosphate transport // inferred from electronic annotation                           | 1.94E-05 | 0.54        | Down       |
| zinc finger protein 358                                                                                                                     | <i>ZNF358</i>    | <a href="#">505837</a> | ---                                                                                             | 1.32E-06 | 0.54        | Down       |
| CXXC finger 5                                                                                                                               | <i>CXXC5</i>     | <a href="#">538485</a> | ---                                                                                             | 1.52E-09 | 0.54        | Down       |
| hypothetical LOC614402                                                                                                                      | <i>LOC614402</i> | <a href="#">614402</a> | ---                                                                                             | 0.009461 | 0.54        | Down       |
| Polymorphic microsatellite locus (AFZ1)                                                                                                     | ---              | ---                    | ---                                                                                             | 9.70E-08 | 0.54        | Down       |
| similar to FLJ00128 protein                                                                                                                 | <i>LOC527362</i> | <a href="#">527362</a> | 0035023 // regulation of Rho protein signal transduction // inferred from electronic annotation | 8.74E-06 | 0.54        | Down       |
| histamine N-methyltransferase                                                                                                               | <i>HNMT</i>      | <a href="#">613413</a> | ---                                                                                             | 1.94E-06 | 0.54        | Down       |
| GTP binding protein overexpressed in skeletal muscle                                                                                        | <i>GEM</i>       | <a href="#">538437</a> | 0007264 // small GTPase mediated signal transduction // inferred from electronic annotation     | 1.21E-05 | 0.54        | Down       |
| sema domain, seven thrombospondin repeats (type 1 and type 1-like), transmembrane domain (TM) and short cytoplasmic domain, (semaphorin) 5A | <i>SEMA5A</i>    | <a href="#">506636</a> | ---                                                                                             | 3.62E-06 | 0.54        | Down       |
| similar to high-risk human papilloma viruses E6 oncoproteins targeted protein                                                               | <i>LOC534839</i> | <a href="#">534839</a> | ---                                                                                             | 3.63E-06 | 0.54        | Down       |

| Gene Title                                                 | Gene Symbol      | Entrez Gene            | Putative Function                                                                                                                                                                                                                       | P-value  | Fold Effect | Regulation |
|------------------------------------------------------------|------------------|------------------------|-----------------------------------------------------------------------------------------------------------------------------------------------------------------------------------------------------------------------------------------|----------|-------------|------------|
| E6TP1 alpha; putative GAP protein alpha                    |                  |                        |                                                                                                                                                                                                                                         |          |             |            |
| similar to CMP-N-acetylneuraminic acid hydroxylase         | <i>LOC537017</i> | <a href="#">537017</a> | ---                                                                                                                                                                                                                                     | 0.000105 | 0.54        | Down       |
| D site of albumin promoter (albumin D-box) binding protein | <i>DBP</i>       | <a href="#">503577</a> | 0006350 // transcription // inferred from electronic annotation /// 0006355 // regulation of transcription, DNA-dependent // inferred from electronic annotation /// 0048511 // rhythmic process // inferred from electronic annotation | 3.47E-08 | 0.54        | Down       |
| retinol binding protein 1, cellular                        | <i>RBP1</i>      | <a href="#">537379</a> | 0006810 // transport // inferred from electronic annotation /// 0042572 // retinol metabolic process // inferred from sequence or structural similarity                                                                                 | 1.08E-06 | 0.55        | Down       |
| carbonic anhydrase XI                                      | <i>CA11</i>      | <a href="#">326334</a> | 0006730 // one-carbon compound metabolic process // inferred from electronic annotation                                                                                                                                                 | 0.000983 | 0.55        | Down       |
| glutathione S-transferase M1                               | <i>GSTM1</i>     | <a href="#">327709</a> | 0008152 // metabolic process // inferred from electronic annotation                                                                                                                                                                     | 7.11E-05 | 0.55        | Down       |
| Kruppel-like factor 11                                     | <i>KLF11</i>     | <a href="#">616730</a> | ---                                                                                                                                                                                                                                     | 7.74E-08 | 0.55        | Down       |
| MAS-related GPR, member F                                  | <i>MRGPRF</i>    | <a href="#">615886</a> | 0007186 // G-protein coupled receptor protein signaling pathway // inferred from electronic annotation                                                                                                                                  | 0.001106 | 0.55        | Down       |
| hypothetical LOC616610                                     | <i>LOC61661</i>  | <a href="#">616610</a> | 0006508 // proteolysis // inferred from electronic annotation /// 0006629 //                                                                                                                                                            | 1.63E-08 | 0.55        | Down       |



| Gene Title                                   | Gene Symbol      | Entrez Gene            | Putative Function                                                                                                                                                                                                                                          | P-value  | Fold Effect | Regulation |
|----------------------------------------------|------------------|------------------------|------------------------------------------------------------------------------------------------------------------------------------------------------------------------------------------------------------------------------------------------------------|----------|-------------|------------|
|                                              | <i>0</i>         |                        | lipid metabolic process // inferred from electronic annotation /// 0008152 // metabolic process // inferred from electronic annotation                                                                                                                     |          |             |            |
| septin 4                                     | <i>SEPT4</i>     | <a href="#">538801</a> | 0007049 // cell cycle // inferred from electronic annotation                                                                                                                                                                                               | 1.12E-06 | 0.55        | Down       |
| Laminin, alpha 4                             | <i>LAMA4</i>     | <a href="#">529670</a> | 0030155 // regulation of cell adhesion // inferred from electronic annotation /// 0030334 // regulation of cell migration // inferred from electronic annotation /// 0045995 // regulation of embryonic development // inferred from electronic annotation | 2.94E-05 | 0.55        | Down       |
| similar to KIAA1623 protein                  | <i>LOC528201</i> | <a href="#">528201</a> | ---                                                                                                                                                                                                                                                        | 1.91E-07 | 0.55        | Down       |
| Aldehyde dehydrogenase 1 family, member A2   | <i>ALDH1A2</i>   | <a href="#">535075</a> | ---                                                                                                                                                                                                                                                        | 0.009624 | 0.55        | Down       |
| similar to SMAP-2b                           | <i>MGC148871</i> | <a href="#">615490</a> | ---                                                                                                                                                                                                                                                        | 4.00E-07 | 0.55        | Down       |
| filamin C, gamma (actin binding protein 280) | <i>FLNC</i>      | <a href="#">528415</a> | ---                                                                                                                                                                                                                                                        | 1.69E-05 | 0.55        | Down       |
| dimethylarginine dimethylaminohydrolase 1    | <i>DDAH1</i>     | <a href="#">537391</a> | 0006809 // nitric oxide biosynthetic process // inferred from direct assay /// 0017014 // protein amino acid nitrosylation // inferred from direct                                                                                                         | 5.36E-07 | 0.55        | Down       |

| Gene Title                                                                                        | Gene Symbol          | Entrez Gene            | Putative Function                                                                                                                                                                                                        | P-value  | Fold Effect | Regulation |
|---------------------------------------------------------------------------------------------------|----------------------|------------------------|--------------------------------------------------------------------------------------------------------------------------------------------------------------------------------------------------------------------------|----------|-------------|------------|
|                                                                                                   |                      |                        | assay                                                                                                                                                                                                                    |          |             |            |
| Tripartite motif-containing 45                                                                    | <i>TRIM45</i>        | <a href="#">539091</a> | ---                                                                                                                                                                                                                      | 0.001513 | 0.55        | Down       |
| membrane-bound transcription factor peptidase, site 1                                             | <i>MBTPS1</i>        | <a href="#">511682</a> | 0006508 // proteolysis // inferred from electronic annotation                                                                                                                                                            | 4.62E-15 | 0.55        | Down       |
| Down syndrome critical region protein 3                                                           | <i>DSCR3</i>         | <a href="#">507647</a> | 0007034 // vacuolar transport // inferred from electronic annotation                                                                                                                                                     | 1.45E-07 | 0.55        | Down       |
| SWI/SNF related, matrix associated, actin dependent regulator of chromatin, subfamily d, member 3 | <i>SMARCD3</i>       | <a href="#">777769</a> | ---                                                                                                                                                                                                                      | 2.37E-05 | 0.55        | Down       |
| adhesion molecule with Ig-like domain 1                                                           | <i>AMIGO1</i>        | <a href="#">524284</a> | ---                                                                                                                                                                                                                      | 8.27E-05 | 0.55        | Down       |
| Similar to Hlcs                                                                                   | <i>LOC53424</i><br>7 | <a href="#">534247</a> | 0006464 // protein modification process // inferred from electronic annotation                                                                                                                                           | 4.23E-08 | 0.55        | Down       |
| similar to KIAA0793 protein                                                                       | <i>LOC51463</i><br>7 | <a href="#">514637</a> | ---                                                                                                                                                                                                                      | 0.0001   | 0.55        | Down       |
| ectonucleotide pyrophosphatase/phosphodiesterase 2 (autotaxin)                                    | <i>ENPP2</i>         | <a href="#">532663</a> | 0006935 // chemotaxis // inferred from electronic annotation ///<br>0008152 // metabolic process // inferred from electronic annotation ///<br>0016042 // lipid catabolic process // inferred from electronic annotation | 2.31E-10 | 0.55        | Down       |
| PHD finger protein 10                                                                             | <i>PHF10</i>         | <a href="#">507648</a> | ---                                                                                                                                                                                                                      | 2.71E-11 | 0.55        | Down       |

| Gene Title                                                  | Gene Symbol   | Entrez Gene            | Putative Function                                                                                                                                                                                                                                               | P-value  | Fold Effect | Regulation |
|-------------------------------------------------------------|---------------|------------------------|-----------------------------------------------------------------------------------------------------------------------------------------------------------------------------------------------------------------------------------------------------------------|----------|-------------|------------|
| ephrin-A5                                                   | <i>EFNA5</i>  | <a href="#">616742</a> | ---                                                                                                                                                                                                                                                             | 0.000187 | 0.55        | Down       |
| alcohol dehydrogenase, iron containing, 1                   | <i>ADHFE1</i> | <a href="#">507711</a> | 0008152 // metabolic process // inferred from electronic annotation /// 0015993 // molecular hydrogen transport // inferred from sequence or structural similarity                                                                                              | 6.59E-07 | 0.56        | Down       |
| mutS homolog 2, colon cancer, nonpolyposis type 1 (E. coli) | <i>MSH2</i>   | <a href="#">533115</a> | 0001701 // in utero embryonic development // inferred from electronic annotation /// 0002204 // somatic recombination of immunoglobulin genes during immune response // inferred from electronic annotation /// 0006119 // oxidative phosphorylation // inferre | 1.13E-08 | 0.56        | Down       |
| leukotriene B4 12-hydroxydehydrogenase                      | <i>LTB4DH</i> | <a href="#">513177</a> | 0008152 // metabolic process // inferred from electronic annotation                                                                                                                                                                                             | 0.00404  | 0.56        | Down       |
| lymphocyte-specific protein tyrosine kinase                 | <i>LCK</i>    | <a href="#">508890</a> | 0006468 // protein amino acid phosphorylation // inferred from electronic annotation /// 0006882 // cellular zinc ion homeostasis // inferred from sequence or structural similarity /// 0006917 // induction of apoptosis // inferred from sequence or structu | 0.000648 | 0.56        | Down       |
| myosin light chain kinase                                   | <i>MYLK</i>   | <a href="#">338037</a> | 0006468 // protein amino acid phosphorylation // inferred from electronic annotation                                                                                                                                                                            | 2.75E-05 | 0.56        | Down       |

| Gene Title                                                                                      | Gene Symbol                      | Entrez Gene             | Putative Function                                                                                                                                                                                                                                               | P-value  | Fold Effect | Regulation |
|-------------------------------------------------------------------------------------------------|----------------------------------|-------------------------|-----------------------------------------------------------------------------------------------------------------------------------------------------------------------------------------------------------------------------------------------------------------|----------|-------------|------------|
| similar to SLC2A4 regulator                                                                     | <i>LOC511523</i>                 | <a href="#">511523</a>  | ---                                                                                                                                                                                                                                                             | 2.78E-08 | 0.56        | Down       |
| ephrin-A5                                                                                       | <i>EFNA5</i>                     | <a href="#">616742</a>  | ---                                                                                                                                                                                                                                                             | 0.001107 | 0.56        | Down       |
| collagen, type IV, alpha 5 (Alport syndrome)                                                    | <i>COL4A5</i>                    | <a href="#">511602</a>  | 0006817 // phosphate transport // inferred from electronic annotation                                                                                                                                                                                           | 2.06E-05 | 0.56        | Down       |
| chromodomain helicase DNA binding protein 3 // centrobin, centrosomal BRCA2 interacting protein | <i>CHD3</i> ///<br><i>CNTROB</i> | 532673<br>///<br>539106 | 0006333 // chromatin assembly or disassembly // inferred from electronic annotation /// 0042309 // homoiothermy // inferred from electronic annotation /// 0045449 // regulation of transcription // inferred from electronic annotation /// 0050826 // respons | 5.83E-09 | 0.56        | Down       |
| Estrogen receptor 1 alpha (ESR1) mRNA, partial sequence                                         | <i>ESR1</i>                      | ---                     | ---                                                                                                                                                                                                                                                             | 5.34E-11 | 0.56        | Down       |
| regulator of calcineurin 2                                                                      | <i>RCAN2</i>                     | <a href="#">525636</a>  | 0019722 // calcium-mediated signaling // inferred from electronic annotation                                                                                                                                                                                    | 0.000703 | 0.56        | Down       |
| acyl-Coenzyme A oxidase 2, branched chain                                                       | <i>ACOX2</i>                     | <a href="#">514969</a>  | 0006631 // fatty acid metabolic process // inferred from electronic annotation /// 0006635 // fatty acid beta-oxidation // inferred from electronic annotation /// 0008152 // metabolic process // inferred from electronic annotation /// 0055114 // oxidation | 2.24E-06 | 0.56        | Down       |

| Gene Title                                 | Gene Symbol      | Entrez Gene            | Putative Function                                                                                                                                                                                                                                               | P-value  | Fold Effect | Regulation |
|--------------------------------------------|------------------|------------------------|-----------------------------------------------------------------------------------------------------------------------------------------------------------------------------------------------------------------------------------------------------------------|----------|-------------|------------|
| similar to DBC2                            | <i>LOC782546</i> | <a href="#">782546</a> | 0007264 // small GTPase mediated signal transduction // inferred from electronic annotation /// 0007275 // multicellular organismal development // inferred from electronic annotation /// 0015031 // protein transport // inferred from electronic annotation  | 6.35E-06 | 0.56        | Down       |
| EH-domain containing 2                     | <i>EHD2</i>      | <a href="#">538348</a> | ---                                                                                                                                                                                                                                                             | 8.53E-08 | 0.56        | Down       |
| cell adhesion molecule 3                   | <i>CADM3</i>     | <a href="#">531178</a> | ---                                                                                                                                                                                                                                                             | 0.005869 | 0.56        | Down       |
| arylsulfatase family, member K             | <i>ARSK</i>      | <a href="#">533618</a> | 0008152 // metabolic process // inferred from electronic annotation                                                                                                                                                                                             | 1.61E-07 | 0.56        | Down       |
| SIX homeobox 5                             | <i>SIX5</i>      | <a href="#">513676</a> | ---                                                                                                                                                                                                                                                             | 0.000164 | 0.56        | Down       |
| Kinetochore associated 1                   | <i>KNTC1</i>     | <a href="#">506353</a> | 0006355 // regulation of transcription, DNA-dependent // inferred from electronic annotation                                                                                                                                                                    | 0.000171 | 0.56        | Down       |
| transcription elongation factor A (SII), 3 | <i>TCEA3</i>     | <a href="#">533803</a> | 0006350 // transcription // inferred from electronic annotation /// 0006354 // RNA elongation // inferred from electronic annotation /// 0006355 // regulation of transcription, DNA-dependent // inferred from electronic annotation /// 0006357 // regulation | 0.000151 | 0.57        | Down       |
| thymidylate synthetase                     | <i>TYMS</i>      | <a href="#">507631</a> | 0006231 // dTMP biosynthetic process // inferred from electronic                                                                                                                                                                                                | 1.37E-07 | 0.57        | Down       |

| Gene Title                                              | Gene Symbol      | Entrez Gene            | Putative Function                                                                                                                                                                                      | P-value  | Fold Effect | Regulation |
|---------------------------------------------------------|------------------|------------------------|--------------------------------------------------------------------------------------------------------------------------------------------------------------------------------------------------------|----------|-------------|------------|
|                                                         |                  |                        | annotation /// 0009165 // nucleotide biosynthetic process // inferred from electronic annotation                                                                                                       |          |             |            |
| hypothetical protein LOC533126                          | <i>LOC533126</i> | <a href="#">533126</a> | ---                                                                                                                                                                                                    | 7.62E-05 | 0.57        | Down       |
| pleckstrin homology-like domain, family B, member 2     | <i>PHLDB2</i>    | <a href="#">509784</a> | ---                                                                                                                                                                                                    | 8.81E-05 | 0.57        | Down       |
| transcription factor-like 5 (basic helix-loop-helix)    | <i>TCFL5</i>     | <a href="#">513750</a> | 0045449 // regulation of transcription // inferred from electronic annotation                                                                                                                          | 5.12E-06 | 0.57        | Down       |
| Coiled-coil-helix-coiled-coil-helix domain containing 6 | <i>CHCHD6</i>    | <a href="#">615934</a> | ---                                                                                                                                                                                                    | 4.93E-05 | 0.57        | Down       |
| ADP-ribosylation factor-like 3                          | <i>ARL3</i>      | <a href="#">540040</a> | 0007186 // G-protein coupled receptor protein signaling pathway // inferred from electronic annotation /// 0007264 // small GTPase mediated signal transduction // inferred from electronic annotation | 2.00E-09 | 0.57        | Down       |
| dynamamin 1                                             | <i>DNM1</i>      | <a href="#">508794</a> | 0006897 // endocytosis // inferred from electronic annotation                                                                                                                                          | 1.22E-06 | 0.57        | Down       |
| Similar to copine III-like related protein              | <i>LOC782388</i> | <a href="#">782388</a> | ---                                                                                                                                                                                                    | 8.94E-08 | 0.57        | Down       |
| CDNA clone IMAGE:8067330                                | ---              | ---                    | ---                                                                                                                                                                                                    | 1.79E-07 | 0.57        | Down       |
| Wilms tumor 1 interacting protein                       | <i>WTIP</i>      | <a href="#">505059</a> | ---                                                                                                                                                                                                    | 2.27E-06 | 0.57        | Down       |

| Gene Title                                     | Gene Symbol      | Entrez Gene            | Putative Function                                                     | P-value  | Fold Effect | Regulation |
|------------------------------------------------|------------------|------------------------|-----------------------------------------------------------------------|----------|-------------|------------|
| Musculoskeletal, embryonic nuclear protein 1   | <i>MUSTN1</i>    | <a href="#">616088</a> | ---                                                                   | 1.09E-06 | 0.57        | Down       |
| similar to LOC113230 protein                   | <i>LOC539805</i> | <a href="#">539805</a> | ---                                                                   | 0.000277 | 0.57        | Down       |
| POZ (BTB) and AT hook containing zinc finger 1 | <i>PATZ1</i>     | <a href="#">532416</a> | ---                                                                   | 3.35E-08 | 0.57        | Down       |
| zinc finger protein 532                        | <i>ZNF532</i>    | <a href="#">533847</a> | ---                                                                   | 1.40E-06 | 0.57        | Down       |
| ankyrin repeat domain 50                       | <i>ANKRD50</i>   | <a href="#">527956</a> | ---                                                                   | 1.05E-09 | 0.57        | Down       |
| two pore segment channel 1                     | <i>TPCN1</i>     | <a href="#">510830</a> | ---                                                                   | 1.94E-05 | 0.57        | Down       |
| heat shock 22kDa protein 8                     | <i>HSPB8</i>     | <a href="#">539524</a> | 0006950 // response to stress // inferred from electronic annotation  | 0.003792 | 0.57        | Down       |
| similar to B0432.9                             | <i>LOC505636</i> | <a href="#">505636</a> | ---                                                                   | 1.22E-06 | 0.57        | Down       |
| nucleosome assembly protein 1-like 5           | <i>NAPIL5</i>    | <a href="#">508508</a> | 0006334 // nucleosome assembly // inferred from electronic annotation | 1.46E-09 | 0.57        | Down       |
| osteoglycin                                    | <i>OGN</i>       | <a href="#">280884</a> | ---                                                                   | 0.000721 | 0.57        | Down       |
| sialic acid binding Ig-like lectin 10          | <i>SIGLEC10</i>  | <a href="#">504258</a> | ---                                                                   | 2.62E-05 | 0.57        | Down       |
| CD44 molecule (Indian blood group)             | <i>CD44</i>      | <a href="#">281057</a> | 0007155 // cell adhesion // inferred from electronic annotation       | 0.000112 | 0.57        | Down       |
| transmembrane protein 132A                     | <i>TMEM132</i>   | <a href="#">540137</a> | ---                                                                   | 2.77E-09 | 0.58        | Down       |

| Gene Title                                                          | Gene Symbol    | Entrez Gene            | Putative Function                                                                                                                                                                                                                                               | P-value  | Fold Effect | Regulation |
|---------------------------------------------------------------------|----------------|------------------------|-----------------------------------------------------------------------------------------------------------------------------------------------------------------------------------------------------------------------------------------------------------------|----------|-------------|------------|
|                                                                     | A              |                        |                                                                                                                                                                                                                                                                 |          |             |            |
| family with sequence similarity 62 (C2 domain containing), member A | <i>FAM62A</i>  | <a href="#">520669</a> | ---                                                                                                                                                                                                                                                             | 1.31E-09 | 0.58        | Down       |
| heat shock 70kD protein 12B                                         | <i>HSPA12B</i> | <a href="#">515590</a> | ---                                                                                                                                                                                                                                                             | 6.26E-09 | 0.58        | Down       |
| cyclin-dependent kinase 5                                           | <i>CDK5</i>    | <a href="#">281066</a> | 0006468 // protein amino acid phosphorylation // inferred from electronic annotation /// 0007049 // cell cycle // inferred from electronic annotation /// 0007160 // cell-matrix adhesion // inferred from electronic annotation /// 0007160 // cell-matrix adh | 4.86E-07 | 0.58        | Down       |
| proline-rich cyclin A1-interacting protein                          | <i>PROCA1</i>  | <a href="#">510175</a> | ---                                                                                                                                                                                                                                                             | 4.54E-07 | 0.58        | Down       |
| heat shock protein, alpha-crystallin-related, B6                    | <i>HSPB6</i>   | <a href="#">534551</a> | 0006950 // response to stress // inferred from electronic annotation                                                                                                                                                                                            | 0.000752 | 0.58        | Down       |
| cyclin-dependent kinase 2-interacting protein                       | <i>CINP</i>    | <a href="#">613767</a> | 0006260 // DNA replication // inferred from electronic annotation /// 0007049 // cell cycle // inferred from electronic annotation /// 0051301 // cell division // inferred from electronic annotation                                                          | 0.002413 | 0.58        | Down       |
| acidic (leucine-rich) nuclear phosphoprotein 32 family, member A    | <i>ANP32A</i>  | <a href="#">538427</a> | 0006350 // transcription // inferred from electronic annotation /// 0006355 // regulation of transcription, DNA-dependent // inferred from electronic annotation /// 0006913 //                                                                                 | 4.76E-10 | 0.58        | Down       |



| Gene Title                                                      | Gene Symbol      | Entrez Gene            | Putative Function                                                                                                                                                                                                                                               | P-value  | Fold Effect | Regulation |
|-----------------------------------------------------------------|------------------|------------------------|-----------------------------------------------------------------------------------------------------------------------------------------------------------------------------------------------------------------------------------------------------------------|----------|-------------|------------|
|                                                                 |                  |                        | nucleocytoplasmic transport // inferred from sequence or structural similarity                                                                                                                                                                                  |          |             |            |
| musculoskeletal, embryonic nuclear protein 1                    | <i>MUSTN1</i>    | <a href="#">616088</a> | ---                                                                                                                                                                                                                                                             | 2.11E-07 | 0.58        | Down       |
| ephrin-A5                                                       | <i>EFNA5</i>     | <a href="#">616742</a> | ---                                                                                                                                                                                                                                                             | 3.77E-06 | 0.58        | Down       |
| Matrix-remodelling associated 7                                 | <i>MXRA7</i>     | <a href="#">617087</a> | ---                                                                                                                                                                                                                                                             | 6.87E-11 | 0.58        | Down       |
| Chromosome 9 open reading frame 6 ortholog                      | <i>C8H9orf6</i>  | <a href="#">507081</a> | ---                                                                                                                                                                                                                                                             | 1.54E-06 | 0.58        | Down       |
| vascular endothelial growth factor A                            | <i>VEGFA</i>     | <a href="#">281572</a> | 0001525 // angiogenesis // inferred from electronic annotation /// 0007275 // multicellular organismal development // inferred from electronic annotation /// 0008283 // cell proliferation // inferred from electronic annotation /// 0030154 // cell differen | 3.44E-06 | 0.58        | Down       |
| Coiled-coil and C2 domain containing 2A                         | <i>CC2D2A</i>    | <a href="#">517240</a> | ---                                                                                                                                                                                                                                                             | 0.000784 | 0.58        | Down       |
| Similar to myotonic dystrophy kinase 5                          | <i>LOC513675</i> | <a href="#">513675</a> | ---                                                                                                                                                                                                                                                             | 0.00139  | 0.58        | Down       |
| serum deprivation response (phosphatidylserine binding protein) | <i>SDPR</i>      | <a href="#">532333</a> | ---                                                                                                                                                                                                                                                             | 0.000173 | 0.58        | Down       |
| EP300 interacting inhibitor of                                  | <i>EID1</i>      | <a href="#">506056</a> | ---                                                                                                                                                                                                                                                             | 9.38E-07 | 0.58        | Down       |

| Gene Title                                         | Gene Symbol      | Entrez Gene            | Putative Function                                                                                                                                                                                                                                                     | P-value  | Fold Effect | Regulation |
|----------------------------------------------------|------------------|------------------------|-----------------------------------------------------------------------------------------------------------------------------------------------------------------------------------------------------------------------------------------------------------------------|----------|-------------|------------|
| differentiation 1                                  |                  |                        |                                                                                                                                                                                                                                                                       |          |             |            |
| CDC42 effector protein (Rho GTPase binding) 1      | <i>CDC42EP1</i>  | <a href="#">511099</a> | 0008360 // regulation of cell shape // inferred from electronic annotation                                                                                                                                                                                            | 1.00E-06 | 0.58        | Down       |
| Similar to CMP-N-acetylneuraminic acid hydroxylase | <i>LOC537017</i> | <a href="#">537017</a> | ---                                                                                                                                                                                                                                                                   | 2.71E-05 | 0.58        | Down       |
| cathepsin F                                        | <i>CTSF</i>      | <a href="#">509715</a> | 0006508 // proteolysis // inferred from electronic annotation                                                                                                                                                                                                         | 1.59E-09 | 0.58        | Down       |
| Similar to LOC496253 protein                       | <i>LOC784007</i> | <a href="#">784007</a> | ---                                                                                                                                                                                                                                                                   | 0.001077 | 0.58        | Down       |
| Notch homolog 4 (Drosophila)                       | <i>NOTCH4</i>    | <a href="#">537814</a> | ---                                                                                                                                                                                                                                                                   | 4.79E-08 | 0.58        | Down       |
| collagen, type I, alpha 1                          | <i>COL1A1</i>    | <a href="#">282187</a> | 0006817 // phosphate transport // inferred from electronic annotation                                                                                                                                                                                                 | 0.000125 | 0.58        | Down       |
| annexin A11                                        | <i>ANXA11</i>    | <a href="#">282142</a> | ---                                                                                                                                                                                                                                                                   | 4.99E-07 | 0.58        | Down       |
| parathyroid hormone receptor 1                     | <i>PTHR1</i>     | <a href="#">507783</a> | 0001501 // skeletal development // inferred from electronic annotation ///<br>0001503 // ossification // inferred from electronic annotation ///<br>0002062 // chondrocyte differentiation // inferred from electronic annotation /// 0002076 // osteoblast developme | 3.27E-06 | 0.58        | Down       |
| similar to neuregulin 2                            | <i>LOC783452</i> | <a href="#">783452</a> | ---                                                                                                                                                                                                                                                                   | 0.00205  | 0.58        | Down       |

| Gene Title                                                | Gene Symbol      | Entrez Gene            | Putative Function                                                                                                                                                                | P-value  | Fold Effect | Regulation |
|-----------------------------------------------------------|------------------|------------------------|----------------------------------------------------------------------------------------------------------------------------------------------------------------------------------|----------|-------------|------------|
| Coiled-coil domain containing 8                           | <i>CCDC8</i>     | <a href="#">616838</a> | ---                                                                                                                                                                              | 5.72E-09 | 0.58        | Down       |
| sterile alpha motif domain containing 1                   | <i>SAMD1</i>     | <a href="#">785246</a> | ---                                                                                                                                                                              | 5.12E-07 | 0.58        | Down       |
| hypothetical LOC509875                                    | <i>LOC509875</i> | <a href="#">509875</a> | ---                                                                                                                                                                              | 0.003552 | 0.58        | Down       |
| zinc finger protein 362                                   | <i>ZNF362</i>    | <a href="#">508065</a> | ---                                                                                                                                                                              | 7.95E-09 | 0.59        | Down       |
| Carbohydrate (N-acetylglucosamine 6-O) sulfotransferase 7 | <i>CHST7</i>     | <a href="#">540357</a> | ---                                                                                                                                                                              | 2.73E-06 | 0.59        | Down       |
| ankyrin repeat domain 23                                  | <i>ANKRD23</i>   | <a href="#">525365</a> | ---                                                                                                                                                                              | 8.65E-06 | 0.59        | Down       |
| collagen, type I, alpha 1                                 | <i>COL1A1</i>    | <a href="#">282187</a> | 0006817 // phosphate transport // inferred from electronic annotation                                                                                                            | 1.65E-05 | 0.59        | Down       |
| Ribosomal protein S8                                      | <i>RPS8</i>      | <a href="#">404140</a> | ---                                                                                                                                                                              | 0.000136 | 0.59        | Down       |
| melanoma inhibitory activity                              | <i>MIA</i>       | <a href="#">280857</a> | 0007160 // cell-matrix adhesion // inferred from electronic annotation ///<br>0030198 // extracellular matrix organization and biogenesis // inferred from electronic annotation | 1.21E-05 | 0.59        | Down       |
| angiopoietin-like 2                                       | <i>ANGPTL2</i>   | <a href="#">512019</a> | ---                                                                                                                                                                              | 3.93E-06 | 0.59        | Down       |
| jagged 1 (Alagille syndrome)                              | <i>JAG1</i>      | <a href="#">783681</a> | ---                                                                                                                                                                              | 6.84E-08 | 0.59        | Down       |
| Collagen, type XXVII, alpha 1                             | <i>COL27A1</i>   | <a href="#">513668</a> | 0006817 // phosphate transport // inferred from electronic annotation ///<br>0007155 // cell adhesion // inferred                                                                | 0.000169 | 0.59        | Down       |

| Gene Title                                                                        | Gene Symbol          | Entrez Gene            | Putative Function                                                                                                                                      | P-value  | Fold Effect | Regulation |
|-----------------------------------------------------------------------------------|----------------------|------------------------|--------------------------------------------------------------------------------------------------------------------------------------------------------|----------|-------------|------------|
|                                                                                   |                      |                        | from electronic annotation                                                                                                                             |          |             |            |
| ST3 beta-galactoside alpha-2,3-sialyltransferase 6                                | <i>ST3GAL6</i>       | <a href="#">444860</a> | 0006486 // protein amino acid glycosylation // inferred from electronic annotation                                                                     | 0.000266 | 0.59        | Down       |
| sarcoglycan, epsilon                                                              | <i>Sgce</i>          | <a href="#">407209</a> | ---                                                                                                                                                    | 1.50E-06 | 0.59        | Down       |
| Cbp/p300-interacting transactivator, with Glu/Asp-rich carboxy-terminal domain, 1 | <i>CITED1</i>        | <a href="#">282182</a> | 0045449 // regulation of transcription // inferred from electronic annotation                                                                          | 1.97E-05 | 0.59        | Down       |
| phosphomannomutase 1                                                              | <i>PMM1</i>          | <a href="#">537070</a> | 0008152 // metabolic process // inferred from electronic annotation /// 0019307 // mannose biosynthetic process // inferred from electronic annotation | 1.96E-09 | 0.59        | Down       |
| ATP-binding cassette, sub-family A (ABC1), member 5                               | <i>ABCA5</i>         | <a href="#">510497</a> | ---                                                                                                                                                    | 1.04E-06 | 0.59        | Down       |
| Hypoxia-inducible factor prolyl 4-hydroxylase                                     | <i>PH-4</i>          | <a href="#">538626</a> | 0019538 // protein metabolic process // inferred from electronic annotation                                                                            | 4.19E-06 | 0.59        | Down       |
| carnitine palmitoyltransferase 1C                                                 | <i>CPT1C</i>         | <a href="#">513710</a> | ---                                                                                                                                                    | 1.52E-06 | 0.59        | Down       |
| dystonin                                                                          | <i>DST</i>           | <a href="#">535297</a> | 0007050 // cell cycle arrest // inferred from electronic annotation                                                                                    | 5.04E-08 | 0.59        | Down       |
| AHNAK nucleoprotein 2                                                             | <i>AHNAK2</i>        | <a href="#">527701</a> | ---                                                                                                                                                    | 6.67E-08 | 0.59        | Down       |
| Similar to POTE8A                                                                 | <i>LOC78697</i><br>7 | <a href="#">786977</a> | ---                                                                                                                                                    | 7.82E-06 | 0.59        | Down       |

| Gene Title                                              | Gene Symbol    | Entrez Gene               | Putative Function                                                                                                                                                              | P-value  | Fold Effect | Regulation |
|---------------------------------------------------------|----------------|---------------------------|--------------------------------------------------------------------------------------------------------------------------------------------------------------------------------|----------|-------------|------------|
| Phosphatidylinositol-4-phosphate 5-kinase, type I, beta | <i>PIP5K1B</i> | <a href="#">537654</a>    | 0046488 // phosphatidylinositol metabolic process // inferred from electronic annotation                                                                                       | 0.006005 | 0.59        | Down       |
| carbonic anhydrase VB, mitochondrial                    | <i>CA5B</i>    | <a href="#">514494</a>    | 0006730 // one-carbon compound metabolic process // inferred from electronic annotation                                                                                        | 0.000146 | 0.59        | Down       |
| iroquois homeobox 3                                     | <i>IRX3</i>    | <a href="#">540417</a>    | 0006355 // regulation of transcription, DNA-dependent // inferred from electronic annotation /// 0045449 // regulation of transcription // inferred from electronic annotation | 0.000367 | 0.59        | Down       |
| casein kinase 1, epsilon                                | <i>CSNK1E</i>  | <a href="#">768234</a>    | 0006468 // protein amino acid phosphorylation // inferred from electronic annotation /// 0016055 // Wnt receptor signaling pathway // inferred from electronic annotation      | 2.93E-05 | 0.59        | Down       |
| CD302 molecule                                          | <i>CD302</i>   | <a href="#">100126272</a> | ---                                                                                                                                                                            | 2.67E-07 | 0.59        | Down       |
| neurotrophic tyrosine kinase, receptor, type 2          | <i>NTRK2</i>   | <a href="#">505824</a>    | ---                                                                                                                                                                            | 0.000133 | 0.59        | Down       |
| DNL-type zinc finger                                    | <i>DNLZ</i>    | <a href="#">514124</a>    | 0045449 // regulation of transcription // inferred from electronic annotation                                                                                                  | 1.74E-09 | 0.59        | Down       |
| LIM domain binding 1                                    | <i>LDB1</i>    | <a href="#">526472</a>    | 0007275 // multicellular organismal development // inferred from electronic annotation                                                                                         | 5.62E-07 | 0.60        | Down       |

| Gene Title                                                                                                      | Gene Symbol      | Entrez Gene            | Putative Function                                                                                                                                                                                                                                | P-value  | Fold Effect | Regulation |
|-----------------------------------------------------------------------------------------------------------------|------------------|------------------------|--------------------------------------------------------------------------------------------------------------------------------------------------------------------------------------------------------------------------------------------------|----------|-------------|------------|
| Hypothetical protein LOC784675                                                                                  | <i>KIAA1462</i>  | <a href="#">784675</a> | ---                                                                                                                                                                                                                                              | 3.57E-07 | 0.60        | Down       |
| hypothetical LOC515954                                                                                          | <i>LOC515954</i> | <a href="#">515954</a> | ---                                                                                                                                                                                                                                              | 3.27E-09 | 0.60        | Down       |
| hypothetical LOC538778                                                                                          | <i>LOC538778</i> | <a href="#">538778</a> | ---                                                                                                                                                                                                                                              | 6.10E-05 | 0.60        | Down       |
| adenylate cyclase 4                                                                                             | <i>ADCY4</i>     | <a href="#">788151</a> | 0006412 // translation // inferred from electronic annotation /// 0007242 // intracellular signaling cascade // inferred from electronic annotation /// 0009190 // cyclic nucleotide biosynthetic process // inferred from electronic annotation | 5.08E-05 | 0.60        | Down       |
| protein phosphatase 1, regulatory (inhibitor) subunit 1B (dopamine and cAMP regulated phosphoprotein, DARPP-32) | <i>PPP1R1B</i>   | <a href="#">282459</a> | 0006350 // transcription // inferred from electronic annotation /// 0007165 // signal transduction // inferred from electronic annotation /// 0007621 // negative regulation of female receptivity // inferred from electronic annotation        | 2.79E-05 | 0.60        | Down       |
| KN motif and ankyrin repeat domains 1                                                                           | <i>KANK1</i>     | <a href="#">534869</a> | ---                                                                                                                                                                                                                                              | 0.001115 | 0.60        | Down       |
| collagen, type XIII, alpha 1                                                                                    | <i>COL13A1</i>   | <a href="#">613849</a> | 0006817 // phosphate transport // inferred from electronic annotation                                                                                                                                                                            | 0.00418  | 0.60        | Down       |
| hypothetical LOC514296                                                                                          | <i>LOC514296</i> | <a href="#">514296</a> | ---                                                                                                                                                                                                                                              | 3.93E-05 | 0.60        | Down       |

| Gene Title                                                                    | Gene Symbol                             | Entrez Gene             | Putative Function                                                                                                                                                                                                                                               | P-value  | Fold Effect | Regulation |
|-------------------------------------------------------------------------------|-----------------------------------------|-------------------------|-----------------------------------------------------------------------------------------------------------------------------------------------------------------------------------------------------------------------------------------------------------------|----------|-------------|------------|
| aminoacylase 1 /// similar to aminoacylase-1                                  | <i>ACY1</i> ///<br><i>LOC79060</i><br>9 | 768058<br>///<br>790609 | 0006508 // proteolysis // inferred from electronic annotation /// 0006520 // amino acid metabolic process // inferred from electronic annotation                                                                                                                | 2.20E-07 | 0.60        | Down       |
| similar to sulfatase 1                                                        | <i>LOC53516</i><br>6                    | <a href="#">535166</a>  | ---                                                                                                                                                                                                                                                             | 0.000536 | 0.60        | Down       |
| Hypothetical protein LOC787439                                                | <i>LOC78743</i><br>9                    | <a href="#">787439</a>  | ---                                                                                                                                                                                                                                                             | 0.000783 | 0.60        | Down       |
| cyclin D1                                                                     | <i>CCND1</i>                            | <a href="#">524530</a>  | 0000320 // re-entry into mitotic cell cycle // inferred from electronic annotation /// 0001934 // positive regulation of protein amino acid phosphorylation // inferred from electronic annotation /// 0006468 // protein amino acid phosphorylation // inferre | 0.001024 | 0.60        | Down       |
| transforming growth factor beta 1 induced transcript 1                        | <i>TGFB1I1</i>                          | <a href="#">515834</a>  | 0016055 // Wnt receptor signaling pathway // inferred from electronic annotation /// 0030154 // cell differentiation // inferred from electronic annotation                                                                                                     | 6.56E-05 | 0.60        | Down       |
| pleckstrin homology domain containing, family G (with RhoGef domain) member 2 | <i>PLEKHG2</i>                          | <a href="#">504530</a>  | 0035023 // regulation of Rho protein signal transduction // inferred from electronic annotation                                                                                                                                                                 | 1.71E-05 | 0.60        | Down       |
| snail homolog 2 (Drosophila)                                                  | <i>SNAI2</i>                            | <a href="#">520631</a>  | 0006350 // transcription // inferred from electronic annotation ///                                                                                                                                                                                             | 2.45E-05 | 0.60        | Down       |

| Gene Title                                                             | Gene Symbol   | Entrez Gene            | Putative Function                                                                                                                                                                                                                                               | P-value  | Fold Effect | Regulation |
|------------------------------------------------------------------------|---------------|------------------------|-----------------------------------------------------------------------------------------------------------------------------------------------------------------------------------------------------------------------------------------------------------------|----------|-------------|------------|
|                                                                        |               |                        | 0006355 // regulation of transcription, DNA-dependent // inferred from electronic annotation /// 0007275 // multicellular organismal development // inferred from electronic annotation ///                                                                     |          |             |            |
| Makorin, ring finger protein, 1                                        | <i>MKRNI</i>  | <a href="#">514986</a> | ---                                                                                                                                                                                                                                                             | 1.26E-09 | 0.60        | Down       |
| prostaglandin D2 synthase 21kDa (brain)                                | <i>PTGDS</i>  | <a href="#">286858</a> | 0001516 // prostaglandin biosynthetic process // inferred from sequence or structural similarity /// 0001516 // prostaglandin biosynthetic process // inferred from electronic annotation /// 0006629 // lipid metabolic process // inferred from electronic an | 2.22E-07 | 0.60        | Down       |
| Ras-related GTP binding D                                              | <i>RRAGD</i>  | <a href="#">541106</a> | ---                                                                                                                                                                                                                                                             | 6.13E-05 | 0.60        | Down       |
| dihydropyrimidinase-like 2                                             | <i>DPYSL2</i> | <a href="#">533746</a> | 0007275 // multicellular organismal development // inferred from electronic annotation /// 0007399 // nervous system development // inferred from electronic annotation /// 0030154 // cell differentiation // inferred from electronic annotation              | 2.49E-05 | 0.60        | Down       |
| trafficking protein, kinesin binding 1                                 | <i>TRAK1</i>  | <a href="#">531649</a> | ---                                                                                                                                                                                                                                                             | 1.67E-06 | 0.60        | Down       |
| claudin 5 (transmembrane protein deleted in velocardiofacial syndrome) | <i>CLDN5</i>  | <a href="#">617453</a> | ---                                                                                                                                                                                                                                                             | 0.007199 | 0.60        | Down       |



| Gene Title                                 | Gene Symbol      | Entrez Gene            | Putative Function                                                                                                                                                                                                                                                     | P-value  | Fold Effect | Regulation |
|--------------------------------------------|------------------|------------------------|-----------------------------------------------------------------------------------------------------------------------------------------------------------------------------------------------------------------------------------------------------------------------|----------|-------------|------------|
| membrane-associated ring finger (C3HC4) 9  | <i>MAR9</i>      | <a href="#">540871</a> | ---                                                                                                                                                                                                                                                                   | 4.32E-05 | 0.60        | Down       |
| similar to SNHG8 protein                   | <i>LOC782900</i> | <a href="#">782900</a> | ---                                                                                                                                                                                                                                                                   | 2.19E-07 | 0.60        | Down       |
| nuclear factor I/A                         | <i>NFIA</i>      | <a href="#">615371</a> | 0006260 // DNA replication // inferred from electronic annotation ///<br>0006350 // transcription // inferred from electronic annotation ///<br>0006355 // regulation of transcription, DNA-dependent // inferred from electronic annotation                          | 6.25E-09 | 0.61        | Down       |
| Hypothetical protein LOC510660             | <i>LOC510660</i> | <a href="#">510660</a> | ---                                                                                                                                                                                                                                                                   | 0.004804 | 0.61        | Down       |
| homeobox B7                                | <i>HOXB7</i>     | <a href="#">281820</a> | 0006350 // transcription // inferred from electronic annotation ///<br>0006355 // regulation of transcription, DNA-dependent // inferred from electronic annotation ///<br>0007275 // multicellular organismal development // inferred from electronic annotation /// | 0.002263 | 0.61        | Down       |
| hypothetical LOC523257                     | <i>LOC523257</i> | <a href="#">523257</a> | ---                                                                                                                                                                                                                                                                   | 3.63E-06 | 0.61        | Down       |
| synaptogyrin 3                             | <i>SYNGR3</i>    | <a href="#">618415</a> | ---                                                                                                                                                                                                                                                                   | 0.000865 | 0.61        | Down       |
| transcription elongation factor A (SII), 2 | <i>TCEA2</i>     | <a href="#">507729</a> | 0006350 // transcription // inferred                                                                                                                                                                                                                                  | 1.40E-06 | 0.61        | Down       |

| Gene Title                                        | Gene Symbol          | Entrez Gene            | Putative Function                                                                                                                                                                                                                            | P-value  | Fold Effect | Regulation |
|---------------------------------------------------|----------------------|------------------------|----------------------------------------------------------------------------------------------------------------------------------------------------------------------------------------------------------------------------------------------|----------|-------------|------------|
|                                                   |                      |                        | from electronic annotation ///<br>0006354 // RNA elongation // inferred<br>from electronic annotation ///<br>0006355 // regulation of transcription,<br>DNA-dependent // inferred from<br>electronic annotation /// 0006357 //<br>regulation |          |             |            |
| Neurotrophic tyrosine kinase, receptor,<br>type 2 | <i>NTRK2</i>         | <a href="#">505824</a> | ---                                                                                                                                                                                                                                          | 1.02E-06 | 0.61        | Down       |
| similar to High-mobility group box 3              | <i>LOC53240</i><br>9 | <a href="#">532409</a> | ---                                                                                                                                                                                                                                          | 4.21E-05 | 0.61        | Down       |
| similar to Chromosome 17 open reading<br>frame 75 | <i>LOC50603</i><br>2 | <a href="#">506032</a> | ---                                                                                                                                                                                                                                          | 2.18E-05 | 0.61        | Down       |
| CWF19-like 1, cell cycle control (S.<br>pombe)    | <i>CWF19L1</i>       | <a href="#">506212</a> | ---                                                                                                                                                                                                                                          | 4.88E-07 | 0.61        | Down       |
| coiled-coil domain containing 23                  | <i>CCDC23</i>        | <a href="#">614073</a> | ---                                                                                                                                                                                                                                          | 1.35E-09 | 0.61        | Down       |
| similar to mineralocorticoid receptor             | <i>LOC61383</i><br>3 | <a href="#">613833</a> | 0006355 // regulation of transcription,<br>DNA-dependent // inferred from<br>electronic annotation                                                                                                                                           | 6.19E-05 | 0.61        | Down       |
| Neurotrophic tyrosine kinase, receptor,<br>type 2 | <i>NTRK2</i>         | <a href="#">505824</a> | ---                                                                                                                                                                                                                                          | 2.64E-05 | 0.61        | Down       |
| melanoma cell adhesion molecule                   | <i>MCAM</i>          | <a href="#">281301</a> | ---                                                                                                                                                                                                                                          | 0.003342 | 0.61        | Down       |
| Solute carrier family 7, member 6                 | <i>SLC7A6OS</i>      | <a href="#">512543</a> | ---                                                                                                                                                                                                                                          | 0.000453 | 0.61        | Down       |

| Gene Title                                  | Gene Symbol      | Entrez Gene            | Putative Function                                                                                                                                                                                   | P-value  | Fold Effect | Regulation |
|---------------------------------------------|------------------|------------------------|-----------------------------------------------------------------------------------------------------------------------------------------------------------------------------------------------------|----------|-------------|------------|
| opposite strand                             |                  |                        |                                                                                                                                                                                                     |          |             |            |
| myosin light chain kinase                   | <i>MYLK</i>      | <a href="#">338037</a> | 0006468 // protein amino acid phosphorylation // inferred from electronic annotation                                                                                                                | 9.32E-05 | 0.61        | Down       |
| adenylate kinase 1                          | <i>AK1</i>       | <a href="#">280715</a> | 0006139 // nucleobase, nucleoside, nucleotide and nucleic acid metabolic process // inferred from electronic annotation /// 0046034 // ATP metabolic process // inferred from electronic annotation | 4.88E-07 | 0.61        | Down       |
| LIM domain binding 1                        | <i>LDB1</i>      | <a href="#">526472</a> | 0007275 // multicellular organismal development // inferred from electronic annotation                                                                                                              | 4.18E-08 | 0.61        | Down       |
| similar to dynein cytoplasmic heavy chain 2 | <i>LOC512287</i> | <a href="#">512287</a> | 0007018 // microtubule-based movement // inferred from electronic annotation                                                                                                                        | 0.000145 | 0.61        | Down       |
| anthrax toxin receptor 2                    | <i>ANTXR2</i>    | <a href="#">510080</a> | ---                                                                                                                                                                                                 | 0.000839 | 0.61        | Down       |
| sal-like 2 (Drosophila)                     | <i>SALL2</i>     | <a href="#">527574</a> | ---                                                                                                                                                                                                 | 0.000289 | 0.61        | Down       |
| dimethylglycine dehydrogenase               | <i>DMGDH</i>     | <a href="#">504453</a> | ---                                                                                                                                                                                                 | 0.000184 | 0.61        | Down       |
| importin 11                                 | <i>IPO11</i>     | <a href="#">538236</a> | ---                                                                                                                                                                                                 | 1.67E-06 | 0.61        | Down       |
| Kruppel-like factor 11                      | <i>KLF11</i>     | <a href="#">616730</a> | ---                                                                                                                                                                                                 | 0.000294 | 0.61        | Down       |
| serpin peptidase inhibitor, clade A (alpha- | <i>SERPINA5</i>  | <a href="#">338050</a> | 0007283 // spermatogenesis //                                                                                                                                                                       | 0.007589 | 0.62        | Down       |

| <b>Gene Title</b>                                                                 | <b>Gene Symbol</b> | <b>Entrez Gene</b>     | <b>Putative Function</b>                                                                                                                                                                                                                                        | <b>P-value</b> | <b>Fold Effect</b> | <b>Regulation</b> |
|-----------------------------------------------------------------------------------|--------------------|------------------------|-----------------------------------------------------------------------------------------------------------------------------------------------------------------------------------------------------------------------------------------------------------------|----------------|--------------------|-------------------|
| 1 antiproteinase, antitrypsin), member 5                                          |                    |                        | inferred from electronic annotation                                                                                                                                                                                                                             |                |                    |                   |
| solute carrier family 6 (neurotransmitter transporter, creatine), member 8        | <i>SLC6A8</i>      | <a href="#">282367</a> | 0006810 // transport // inferred from electronic annotation /// 0006811 // ion transport // inferred from electronic annotation /// 0006814 // sodium ion transport // inferred from electronic annotation /// 0006836 // neurotransmitter transport // inferre | 2.92E-06       | 0.62               | Down              |
| potassium large conductance calcium-activated channel, subfamily M, beta member 4 | <i>KCNMB4</i>      | <a href="#">520448</a> | 0006813 // potassium ion transport // inferred from electronic annotation                                                                                                                                                                                       | 0.002327       | 0.62               | Down              |
| similar to SLIT3                                                                  | <i>LOC615883</i>   | <a href="#">615883</a> | 0007186 // G-protein coupled receptor protein signaling pathway // inferred from electronic annotation                                                                                                                                                          | 0.000389       | 0.62               | Down              |
| cytochrome P450, family 2, subfamily U, polypeptide 1                             | <i>CYP2U1</i>      | <a href="#">535227</a> | 0055114 // oxidation reduction // inferred from electronic annotation                                                                                                                                                                                           | 2.65E-07       | 0.62               | Down              |
| hypothetical protein LOC790454                                                    | <i>LOC790454</i>   | <a href="#">790454</a> | ---                                                                                                                                                                                                                                                             | 0.000419       | 0.62               | Down              |
| G protein-coupled receptor 116                                                    | <i>GPR116</i>      | <a href="#">532674</a> | 0007218 // neuropeptide signaling pathway // inferred from electronic annotation /// 0007601 // visual perception // inferred from electronic annotation                                                                                                        | 3.05E-05       | 0.62               | Down              |
| CXXC finger 5                                                                     | <i>CXXC5</i>       | <a href="#">538485</a> | ---                                                                                                                                                                                                                                                             | 1.23E-05       | 0.62               | Down              |

| Gene Title                                                                                                                                                      | Gene Symbol                                                                                         | Entrez Gene                                                   | Putative Function                                                                                                                                                                                                                                                                    | P-value  | Fold Effect | Regulation |
|-----------------------------------------------------------------------------------------------------------------------------------------------------------------|-----------------------------------------------------------------------------------------------------|---------------------------------------------------------------|--------------------------------------------------------------------------------------------------------------------------------------------------------------------------------------------------------------------------------------------------------------------------------------|----------|-------------|------------|
| phosphoinositide-3-kinase interacting protein 1                                                                                                                 | <i>PIK3IP1</i>                                                                                      | <a href="#">512082</a>                                        | ---                                                                                                                                                                                                                                                                                  | 1.32E-05 | 0.62        | Down       |
| similar to protocadherin gamma B6 ///<br>protocadherin gamma subfamily A, 8 ///<br>protocadherin gamma subfamily B, 4 ///<br>protocadherin gamma subfamily C, 3 | <i>LOC51084</i><br><i>9</i> ///<br><i>PCDHGA8</i><br>///<br><i>PCDHGB4</i><br>///<br><i>PCDHGC3</i> | 1001253<br>01 ///<br>510849<br>///<br>521340<br>///<br>532241 | 0007155 // cell adhesion // inferred<br>from electronic annotation ///<br>0007156 // homophilic cell adhesion<br>// inferred from electronic annotation                                                                                                                              | 5.69E-08 | 0.62        | Down       |
| PRA1 domain family, member 2                                                                                                                                    | <i>PRAF2</i>                                                                                        | <a href="#">508703</a>                                        | 0006810 // transport // inferred from<br>electronic annotation /// 0015031 //<br>protein transport // inferred from<br>electronic annotation                                                                                                                                         | 1.00E-08 | 0.62        | Down       |
| Zinc finger protein 608                                                                                                                                         | <i>ZNF608</i>                                                                                       | <a href="#">509992</a>                                        | ---                                                                                                                                                                                                                                                                                  | 5.58E-06 | 0.62        | Down       |
| similar to MEGF8                                                                                                                                                | <i>LOC61568</i><br>8                                                                                | <a href="#">615688</a>                                        | ---                                                                                                                                                                                                                                                                                  | 6.44E-08 | 0.62        | Down       |
| endothelin receptor type A                                                                                                                                      | <i>EDNRA</i>                                                                                        | <a href="#">281749</a>                                        | 0001569 // patterning of blood vessels<br>// inferred from electronic annotation<br>/// 0001666 // response to hypoxia //<br>inferred from electronic annotation ///<br>0001701 // in utero embryonic<br>development // inferred from<br>electronic annotation /// 0007165 //<br>sig | 0.000912 | 0.62        | Down       |
| tribbles homolog 2 (Drosophila)                                                                                                                                 | <i>TRIB2</i>                                                                                        | <a href="#">352960</a>                                        | 0006468 // protein amino acid<br>phosphorylation // inferred from                                                                                                                                                                                                                    | 0.000535 | 0.62        | Down       |

| Gene Title                                             | Gene Symbol      | Entrez Gene            | Putative Function                                                                                                                                                                                               | P-value  | Fold Effect | Regulation |
|--------------------------------------------------------|------------------|------------------------|-----------------------------------------------------------------------------------------------------------------------------------------------------------------------------------------------------------------|----------|-------------|------------|
|                                                        |                  |                        | sequence or structural similarity ///<br>0006468 // protein amino acid<br>phosphorylation // inferred from<br>electronic annotation /// 0043405 //<br>regulation of MAP kinase activity //<br>inferred from seq |          |             |            |
| procollagen-lysine, 2-oxoglutarate 5-<br>dioxygenase 2 | <i>PLOD2</i>     | <a href="#">533642</a> | 0019538 // protein metabolic process<br>// inferred from electronic annotation                                                                                                                                  | 5.99E-05 | 0.62        | Down       |
| tropomyosin 2 (beta)                                   | <i>TPM2</i>      | <a href="#">497015</a> | ---                                                                                                                                                                                                             | 0.000128 | 0.62        | Down       |
| RAB34, member RAS oncogene family                      | <i>RAB34</i>     | <a href="#">282028</a> | 0007264 // small GTPase mediated<br>signal transduction // inferred from<br>electronic annotation                                                                                                               | 1.10E-08 | 0.62        | Down       |
| syntaxin 10                                            | <i>STX10</i>     | <a href="#">525379</a> | 0006886 // intracellular protein<br>transport // inferred from electronic<br>annotation /// 0048193 // Golgi<br>vesicle transport // inferred from<br>electronic annotation                                     | 0.000158 | 0.62        | Down       |
| FYN oncogene related to SRC, FGR, YES                  | <i>FYN</i>       | <a href="#">527263</a> | 0006468 // protein amino acid<br>phosphorylation // inferred from<br>electronic annotation /// 0007275 //<br>multicellular organismal development<br>// inferred from electronic annotation                     | 3.02E-06 | 0.62        | Down       |
| hypothetical LOC504970                                 | <i>LOC504970</i> | <a href="#">504970</a> | ---                                                                                                                                                                                                             | 0.009259 | 0.62        | Down       |
| TGF beta-inducible nuclear protein 1 (L-               | <i>TINP1</i>     | <a href="#">522309</a> | 0006364 // rRNA processing //<br>inferred from electronic annotation ///                                                                                                                                        | 3.73E-07 | 0.63        | Down       |

| Gene Title                                                         | Gene Symbol      | Entrez Gene            | Putative Function                                                                                                                                                  | P-value  | Fold Effect | Regulation |
|--------------------------------------------------------------------|------------------|------------------------|--------------------------------------------------------------------------------------------------------------------------------------------------------------------|----------|-------------|------------|
| name related LNR42)                                                |                  |                        | 0042254 // ribosome biogenesis and assembly // inferred from electronic annotation                                                                                 |          |             |            |
| myozenin 1                                                         | <i>MYOZ1</i>     | <a href="#">281939</a> | ---                                                                                                                                                                | 0.000712 | 0.63        | Down       |
| similar to RAD21-like 1 (S. pombe)                                 | <i>LOC512408</i> | <a href="#">512408</a> | ---                                                                                                                                                                | 1.81E-07 | 0.63        | Down       |
| hypothetical protein FLJ14213                                      | <i>FLJ14213</i>  | <a href="#">505048</a> | ---                                                                                                                                                                | 0.005893 | 0.63        | Down       |
| Inositol polyphosphate-5-phosphatase, 40kDa                        | <i>INPP5A</i>    | <a href="#">615232</a> | ---                                                                                                                                                                | 3.98E-08 | 0.63        | Down       |
| damage-specific DNA binding protein 2, 48kDa                       | <i>DDB2</i>      | <a href="#">519357</a> | ---                                                                                                                                                                | 3.84E-07 | 0.63        | Down       |
| tubulin tyrosine ligase-like family, member 3                      | <i>TTL3</i>      | <a href="#">531866</a> | 0006464 // protein modification process // inferred from electronic annotation /// 0030041 // actin filament polymerization // inferred from electronic annotation | 2.36E-07 | 0.63        | Down       |
| transient receptor potential cation channel, subfamily V, member 2 | <i>TRPV2</i>     | <a href="#">507664</a> | 0006810 // transport // inferred from electronic annotation /// 0006811 // ion transport // inferred from electronic annotation                                    | 0.001838 | 0.63        | Down       |
| ligand dependent nuclear receptor corepressor                      | <i>LCOR</i>      | <a href="#">507668</a> | ---                                                                                                                                                                | 2.49E-07 | 0.63        | Down       |
| odd-skipped related 2 (Drosophila)                                 | <i>OSR2</i>      | <a href="#">508692</a> | 0008284 // positive regulation of cell proliferation // inferred from                                                                                              | 9.21E-08 | 0.63        | Down       |

| Gene Title                                                       | Gene Symbol     | Entrez Gene            | Putative Function                                                                                                                                                                                                                                              | P-value  | Fold Effect | Regulation |
|------------------------------------------------------------------|-----------------|------------------------|----------------------------------------------------------------------------------------------------------------------------------------------------------------------------------------------------------------------------------------------------------------|----------|-------------|------------|
|                                                                  |                 |                        | electronic annotation /// 0048704 // embryonic skeletal morphogenesis // inferred from electronic annotation                                                                                                                                                   |          |             |            |
| Rho GTPase activating protein 24                                 | <i>ARHGAP24</i> | <a href="#">539902</a> | 0007165 // signal transduction // inferred from electronic annotation                                                                                                                                                                                          | 0.00511  | 0.63        | Down       |
| tetraspanin 6                                                    | <i>TSPAN6</i>   | <a href="#">514741</a> | ---                                                                                                                                                                                                                                                            | 7.24E-08 | 0.63        | Down       |
| acidic (leucine-rich) nuclear phosphoprotein 32 family, member A | <i>ANP32A</i>   | <a href="#">538427</a> | 0006350 // transcription // inferred from electronic annotation /// 0006355 // regulation of transcription, DNA-dependent // inferred from electronic annotation /// 0006913 // nucleocytoplasmic transport // inferred from sequence or structural similarity | 3.71E-09 | 0.63        | Down       |
| StAR-related lipid transfer (START) domain containing 10         | <i>STARD10</i>  | <a href="#">514624</a> | ---                                                                                                                                                                                                                                                            | 0.007221 | 0.63        | Down       |
| dual specificity phosphatase 7                                   | <i>DUSP7</i>    | <a href="#">785016</a> | 0006470 // protein amino acid dephosphorylation // inferred from electronic annotation /// 0016311 // dephosphorylation // inferred from electronic annotation                                                                                                 | 1.21E-05 | 0.63        | Down       |
| kelch-like 8 (Drosophila)                                        | <i>KLHL8</i>    | <a href="#">532960</a> | ---                                                                                                                                                                                                                                                            | 0.000186 | 0.63        | Down       |
| uveal autoantigen with coiled-coil domains and ankyrin repeats   | <i>UACA</i>     | <a href="#">281559</a> | 0006355 // regulation of transcription, DNA-dependent // inferred from electronic annotation /// 0008630 // DNA damage response, signal                                                                                                                        | 4.15E-08 | 0.63        | Down       |



| Gene Title                                                                   | Gene Symbol    | Entrez Gene               | Putative Function                                                                                                                                                                                                                        | P-value  | Fold Effect | Regulation |
|------------------------------------------------------------------------------|----------------|---------------------------|------------------------------------------------------------------------------------------------------------------------------------------------------------------------------------------------------------------------------------------|----------|-------------|------------|
|                                                                              |                |                           | transduction resulting in induction of apoptosis // inferred from electronic annotation /// 0008631 // induction of apo                                                                                                                  |          |             |            |
| GDP-mannose 4,6-dehydratase                                                  | <i>GMDS</i>    | <a href="#">617688</a>    | 0008152 // metabolic process // inferred from electronic annotation /// 0019673 // GDP-mannose metabolic process // inferred from electronic annotation /// 0044237 // cellular metabolic process // inferred from electronic annotation | 0.000953 | 0.63        | Down       |
| prenylcysteine oxidase 1                                                     | <i>PCYOX1</i>  | <a href="#">100125835</a> | 0008152 // metabolic process // inferred from electronic annotation                                                                                                                                                                      | 5.95E-08 | 0.63        | Down       |
| TYRO3 protein tyrosine kinase                                                | <i>TYRO3</i>   | <a href="#">788224</a>    | 0006468 // protein amino acid phosphorylation // inferred from electronic annotation                                                                                                                                                     | 0.000108 | 0.63        | Down       |
| pleckstrin homology domain containing, family H (with MyTH4 domain) member 3 | <i>PLEKHH3</i> | <a href="#">541100</a>    | 0005975 // carbohydrate metabolic process // inferred from electronic annotation                                                                                                                                                         | 1.86E-06 | 0.63        | Down       |
| transmembrane protein 98                                                     | <i>TMEM98</i>  | <a href="#">513445</a>    | ---                                                                                                                                                                                                                                      | 6.16E-05 | 0.63        | Down       |
| myeloid leukemia factor 1                                                    | <i>MLF1</i>    | <a href="#">533379</a>    | 0002318 // myeloid progenitor cell differentiation // inferred from sequence or structural similarity /// 0002318 // myeloid progenitor cell differentiation // inferred from electronic annotation /// 0006350 //                       | 0.008448 | 0.63        | Down       |

| Gene Title                                                                                    | Gene Symbol                              | Entrez Gene             | Putative Function                                                                                                                                                                                                                                           | P-value  | Fold Effect | Regulation |
|-----------------------------------------------------------------------------------------------|------------------------------------------|-------------------------|-------------------------------------------------------------------------------------------------------------------------------------------------------------------------------------------------------------------------------------------------------------|----------|-------------|------------|
|                                                                                               |                                          |                         | transcription // inferred from sequence or s                                                                                                                                                                                                                |          |             |            |
| sulfite oxidase                                                                               | <i>SUOX</i>                              | <a href="#">509837</a>  | 0055114 // oxidation reduction // inferred from electronic annotation                                                                                                                                                                                       | 1.22E-09 | 0.63        | Down       |
| limb bud and heart development homolog (mouse)                                                | <i>LBH</i>                               | <a href="#">616148</a>  | 0006350 // transcription // inferred from electronic annotation /// 0006355 // regulation of transcription, DNA-dependent // inferred from electronic annotation /// 0007275 // multicellular organismal development // inferred from electronic annotation | 0.000835 | 0.63        | Down       |
| lysyl oxidase-like 1                                                                          | <i>LOXL1</i>                             | <a href="#">281903</a>  | ---                                                                                                                                                                                                                                                         | 1.52E-05 | 0.63        | Down       |
| coiled-coil domain containing 138                                                             | <i>CCDC138</i>                           | <a href="#">507644</a>  | ---                                                                                                                                                                                                                                                         | 1.30E-07 | 0.63        | Down       |
| Notch homolog 4 (Drosophila)                                                                  | <i>NOTCH4</i>                            | <a href="#">537814</a>  | ---                                                                                                                                                                                                                                                         | 1.06E-06 | 0.63        | Down       |
| serpin peptidase inhibitor, clade E (nexin, plasminogen activator inhibitor type 1), member 2 | <i>SERPINE2</i>                          | <a href="#">282521</a>  | 0007186 // G-protein coupled receptor protein signaling pathway // inferred from electronic annotation                                                                                                                                                      | 1.48E-06 | 0.63        | Down       |
| collagen, type I, alpha 2                                                                     | <i>COL1A2</i>                            | <a href="#">282188</a>  | 0006817 // phosphate transport // inferred from electronic annotation                                                                                                                                                                                       | 1.51E-06 | 0.63        | Down       |
| hypothetical protein LOC515282                                                                | <i>CXorf45</i>                           | <a href="#">515282</a>  | ---                                                                                                                                                                                                                                                         | 5.49E-05 | 0.63        | Down       |
| similar to OB-cadherin-1 /// cadherin 11, type 2, OB-cadherin (osteoblast)                    | <i>CDH11</i> ///<br><i>LOC53536</i><br>3 | 535363<br>///<br>785475 | 0007155 // cell adhesion // inferred from electronic annotation ///<br>0007156 // homophilic cell adhesion                                                                                                                                                  | 3.69E-05 | 0.63        | Down       |

| <b>Gene Title</b>                                                                              | <b>Gene Symbol</b> | <b>Entrez Gene</b>     | <b>Putative Function</b>                                                                                                                                            | <b>P-value</b> | <b>Fold Effect</b> | <b>Regulation</b> |
|------------------------------------------------------------------------------------------------|--------------------|------------------------|---------------------------------------------------------------------------------------------------------------------------------------------------------------------|----------------|--------------------|-------------------|
| // inferred from electronic annotation                                                         |                    |                        |                                                                                                                                                                     |                |                    |                   |
| phospholipid transfer protein                                                                  | <i>PLTP</i>        | <a href="#">505640</a> | ---                                                                                                                                                                 | 0.000303       | 0.63               | Down              |
| TBC1 domain family, member 24                                                                  | <i>TBC1D24</i>     | <a href="#">529002</a> | 0032313 // regulation of Rab GTPase activity // inferred from electronic annotation                                                                                 | 6.90E-08       | 0.63               | Down              |
| Eukaryotic translation initiation factor 2-alpha kinase 2                                      | <i>EIF2AK2</i>     | <a href="#">347700</a> | 0006468 // protein amino acid phosphorylation // inferred from electronic annotation                                                                                | 4.52E-05       | 0.64               | Down              |
| similar to Pur-gamma B-form                                                                    | <i>LOC512941</i>   | <a href="#">512941</a> | ---                                                                                                                                                                 | 1.70E-06       | 0.64               | Down              |
| MACRO domain containing 1                                                                      | <i>MACROD1</i>     | <a href="#">613568</a> | ---                                                                                                                                                                 | 0.006848       | 0.64               | Down              |
| myeloid/lymphoid or mixed-lineage leukemia (trithorax homolog, Drosophila); translocated to, 3 | <i>MLLT3</i>       | <a href="#">521962</a> | 0006355 // regulation of transcription, DNA-dependent // inferred from electronic annotation                                                                        | 4.47E-06       | 0.64               | Down              |
| RAB30, member RAS oncogene family                                                              | <i>RAB30</i>       | <a href="#">540583</a> | 0007264 // small GTPase mediated signal transduction // inferred from electronic annotation /// 0015031 // protein transport // inferred from electronic annotation | 3.82E-07       | 0.64               | Down              |
| similar to tigger transposable element derived 5                                               | <i>LOC540422</i>   | <a href="#">540422</a> | ---                                                                                                                                                                 | 3.44E-07       | 0.64               | Down              |
| CXXC finger 5                                                                                  | <i>CXXC5</i>       | <a href="#">538485</a> | ---                                                                                                                                                                 | 1.08E-06       | 0.64               | Down              |

| Gene Title                                                                                                                                                                                   | Gene Symbol     | Entrez Gene            | Putative Function                                                                                                                                                                | P-value  | Fold Effect | Regulation |
|----------------------------------------------------------------------------------------------------------------------------------------------------------------------------------------------|-----------------|------------------------|----------------------------------------------------------------------------------------------------------------------------------------------------------------------------------|----------|-------------|------------|
| syntaxin 10                                                                                                                                                                                  | <i>STX10</i>    | <a href="#">525379</a> | 0006886 // intracellular protein transport // inferred from electronic annotation /// 0048193 // Golgi vesicle transport // inferred from electronic annotation                  | 1.72E-08 | 0.64        | Down       |
| WD repeat domain 51B                                                                                                                                                                         | <i>WDR51B</i>   | <a href="#">525136</a> | ---                                                                                                                                                                              | 1.74E-09 | 0.64        | Down       |
| Heparan sulfate proteoglycan 2                                                                                                                                                               | <i>HSPG2</i>    | <a href="#">444872</a> | 0007155 // cell adhesion // inferred from electronic annotation                                                                                                                  | 1.08E-05 | 0.64        | Down       |
| fibroblast growth factor receptor 2 (bacteria-expressed kinase, keratinocyte growth factor receptor, craniofacial dysostosis 1, Crouzon syndrome, Pfeiffer syndrome, Jackson-Weiss syndrome) | <i>FGFR2</i>    | <a href="#">404193</a> | 0006468 // protein amino acid phosphorylation // inferred from electronic annotation                                                                                             | 0.001821 | 0.64        | Down       |
| armadillo repeat containing, X-linked 6                                                                                                                                                      | <i>ARMCX6</i>   | <a href="#">768308</a> | ---                                                                                                                                                                              | 4.99E-05 | 0.64        | Down       |
| trinucleotide repeat containing 6C                                                                                                                                                           | <i>TNRC6C</i>   | <a href="#">504217</a> | ---                                                                                                                                                                              | 6.95E-07 | 0.64        | Down       |
| guanine nucleotide binding protein (G protein), alpha inhibiting activity polypeptide 1                                                                                                      | <i>GNAI1</i>    | <a href="#">281790</a> | 0007165 // signal transduction // inferred from electronic annotation /// 0007186 // G-protein coupled receptor protein signaling pathway // inferred from electronic annotation | 2.65E-07 | 0.64        | Down       |
| roundabout, axon guidance receptor, homolog 1 (Drosophila)                                                                                                                                   | <i>ROBO1</i>    | <a href="#">536815</a> | ---                                                                                                                                                                              | 0.001495 | 0.64        | Down       |
| ribonuclease H2, subunit C                                                                                                                                                                   | <i>RNASEH2C</i> | <a href="#">505618</a> | ---                                                                                                                                                                              | 5.18E-07 | 0.64        | Down       |

| Gene Title                                             | Gene Symbol      | Entrez Gene            | Putative Function                                                                                                                                                              | P-value  | Fold Effect | Regulation |
|--------------------------------------------------------|------------------|------------------------|--------------------------------------------------------------------------------------------------------------------------------------------------------------------------------|----------|-------------|------------|
| cysteine and glycine-rich protein 1                    | <i>CSRP1</i>     | <a href="#">615329</a> | ---                                                                                                                                                                            | 1.21E-05 | 0.64        | Down       |
| ELK3, ETS-domain protein (SRF accessory protein 2)     | <i>ELK3</i>      | <a href="#">541125</a> | 0006355 // regulation of transcription, DNA-dependent // inferred from electronic annotation                                                                                   | 7.52E-05 | 0.64        | Down       |
| Regulator of G-protein signaling 5                     | <i>RGS5</i>      | <a href="#">540509</a> | 0009968 // negative regulation of signal transduction // inferred from electronic annotation                                                                                   | 0.00198  | 0.64        | Down       |
| similar to KIAA2038 protein                            | <i>LOC783429</i> | <a href="#">783429</a> | ---                                                                                                                                                                            | 0.000171 | 0.64        | Down       |
| hypothetical LOC517668                                 | <i>LOC517668</i> | <a href="#">517668</a> | ---                                                                                                                                                                            | 1.71E-05 | 0.64        | Down       |
| LATS, large tumor suppressor, homolog 2 (Drosophila)   | <i>LATS2</i>     | <a href="#">508208</a> | ---                                                                                                                                                                            | 0.0047   | 0.64        | Down       |
| Meis homeobox 1                                        | <i>MEIS1</i>     | <a href="#">613877</a> | 0006355 // regulation of transcription, DNA-dependent // inferred from electronic annotation /// 0045449 // regulation of transcription // inferred from electronic annotation | 2.98E-07 | 0.64        | Down       |
| similar to OTTHUMP00000022229                          | <i>LOC616324</i> | <a href="#">616324</a> | ---                                                                                                                                                                            | 7.06E-11 | 0.64        | Down       |
| cytochrome P450, family 20, subfamily A, polypeptide 1 | <i>CYP20A1</i>   | <a href="#">532945</a> | 0055114 // oxidation reduction // inferred from electronic annotation                                                                                                          | 2.56E-05 | 0.64        | Down       |
| endomucin                                              | <i>EMCN</i>      | <a href="#">616367</a> | ---                                                                                                                                                                            | 5.71E-05 | 0.64        | Down       |

| Gene Title                                                                              | Gene Symbol       | Entrez Gene            | Putative Function                                                                                                                                                                                                                                                | P-value  | Fold Effect | Regulation |
|-----------------------------------------------------------------------------------------|-------------------|------------------------|------------------------------------------------------------------------------------------------------------------------------------------------------------------------------------------------------------------------------------------------------------------|----------|-------------|------------|
| phosphatase, orphan 2                                                                   | <i>PHOSPHO2</i>   | <a href="#">507308</a> | 0008152 // metabolic process // inferred from electronic annotation                                                                                                                                                                                              | 6.98E-08 | 0.64        | Down       |
| Chromosome 1 open reading frame 21 ortholog                                             | <i>H16C1ORF21</i> | <a href="#">781721</a> | ---                                                                                                                                                                                                                                                              | 2.67E-05 | 0.64        | Down       |
| natriuretic peptide receptor B/guanylate cyclase B (atriuretic peptide receptor B)      | <i>NPR2</i>       | <a href="#">281357</a> | 0006182 // cGMP biosynthetic process // inferred from electronic annotation /// 0006182 // cGMP biosynthetic process // inferred from sequence or structural similarity /// 0006468 // protein amino acid phosphorylation // inferred from electronic annotation | 6.28E-05 | 0.64        | Down       |
| TEK tyrosine kinase, endothelial (venous malformations, multiple cutaneous and mucosal) | <i>TEK</i>        | <a href="#">280939</a> | 0006468 // protein amino acid phosphorylation // inferred from electronic annotation /// 0007160 // cell-matrix adhesion // inferred from electronic annotation /// 0016337 // cell-cell adhesion // inferred from electronic annotation /// 0030334 // regulat  | 0.000141 | 0.64        | Down       |
| monocyte to macrophage differentiation-associated                                       | <i>MMD</i>        | <a href="#">513155</a> | 0019835 // cytolysis // inferred from electronic annotation                                                                                                                                                                                                      | 1.24E-05 | 0.64        | Down       |
| armadillo repeat containing, X-linked 1                                                 | <i>ARMCX1</i>     | <a href="#">504577</a> | ---                                                                                                                                                                                                                                                              | 0.000288 | 0.64        | Down       |
| transcription factor 4                                                                  | <i>TCF4</i>       | <a href="#">534935</a> | 0045449 // regulation of transcription // inferred from electronic annotation                                                                                                                                                                                    | 6.46E-06 | 0.64        | Down       |

| Gene Title                                           | Gene Symbol      | Entrez Gene            | Putative Function                                                                                                                                                  | P-value  | Fold Effect | Regulation |
|------------------------------------------------------|------------------|------------------------|--------------------------------------------------------------------------------------------------------------------------------------------------------------------|----------|-------------|------------|
| C-type lectin domain family 14, member A             | <i>CLEC14A</i>   | <a href="#">509367</a> | ---                                                                                                                                                                | 9.21E-07 | 0.64        | Down       |
| Small EDRK-rich factor 2                             | <i>SERF2</i>     | <a href="#">527852</a> | ---                                                                                                                                                                | 1.10E-07 | 0.64        | Down       |
| transmembrane protein 119                            | <i>TMEM119</i>   | <a href="#">510926</a> | ---                                                                                                                                                                | 2.27E-06 | 0.65        | Down       |
| mannose receptor, C type 2                           | <i>MRC2</i>      | <a href="#">529049</a> | ---                                                                                                                                                                | 1.56E-06 | 0.65        | Down       |
| galactose-1-phosphate uridylyltransferase            | <i>GALT</i>      | <a href="#">506997</a> | 0005975 // carbohydrate metabolic process // inferred from electronic annotation /// 0006012 // galactose metabolic process // inferred from electronic annotation | 3.86E-07 | 0.65        | Down       |
| Doublecortin-like kinase 1                           | <i>DCLK1</i>     | <a href="#">613449</a> | 0007242 // intracellular signaling cascade // inferred from electronic annotation                                                                                  | 1.92E-05 | 0.65        | Down       |
| S-adenosylhomocysteine hydrolase-like 2              | <i>AHCYL2</i>    | <a href="#">532836</a> | 0006730 // one-carbon compound metabolic process // inferred from electronic annotation /// 0008152 // metabolic process // inferred from electronic annotation    | 1.62E-05 | 0.65        | Down       |
| EGF-like, fibronectin type III and laminin G domains | <i>EGFLAM</i>    | <a href="#">534427</a> | ---                                                                                                                                                                | 0.000104 | 0.65        | Down       |
| hypothetical protein LOC788023                       | <i>LOC788023</i> | <a href="#">788023</a> | ---                                                                                                                                                                | 5.84E-07 | 0.65        | Down       |
| casein kinase I beta                                 | <i>CSNK1B</i>    | <a href="#">785423</a> | 0006468 // protein amino acid                                                                                                                                      | 0.000153 | 0.65        | Down       |

| Gene Title                                                                      | Gene Symbol     | Entrez Gene            | Putative Function                                                                                                                                                                                                                                  | P-value  | Fold Effect | Regulation |
|---------------------------------------------------------------------------------|-----------------|------------------------|----------------------------------------------------------------------------------------------------------------------------------------------------------------------------------------------------------------------------------------------------|----------|-------------|------------|
|                                                                                 |                 |                        | phosphorylation // inferred from electronic annotation /// 0016055 // Wnt receptor signaling pathway // inferred from electronic annotation                                                                                                        |          |             |            |
| Aspartate beta-hydroxylase                                                      | <i>ASPH</i>     | <a href="#">286771</a> | 0018193 // peptidyl-amino acid modification // inferred from electronic annotation                                                                                                                                                                 | 5.27E-06 | 0.65        | Down       |
| TAF7 RNA polymerase II, TATA box binding protein (TBP)-associated factor, 55kDa | <i>TAF7</i>     | <a href="#">509327</a> | 0006350 // transcription // inferred from electronic annotation /// 0006355 // regulation of transcription, DNA-dependent // inferred from electronic annotation /// 0045449 // regulation of transcription // inferred from electronic annotation | 1.51E-08 | 0.65        | Down       |
| junctional adhesion molecule 2                                                  | <i>JAM2</i>     | <a href="#">538846</a> | ---                                                                                                                                                                                                                                                | 3.60E-06 | 0.65        | Down       |
| Tubulin, beta                                                                   | <i>TUBB</i>     | <a href="#">615087</a> | 0007017 // microtubule-based process // inferred from electronic annotation /// 0007018 // microtubule-based movement // inferred from electronic annotation /// 0051258 // protein polymerization // inferred from electronic annotation          | 2.48E-05 | 0.65        | Down       |
| coenzyme Q10 homolog A ( <i>S. cerevisiae</i> )                                 | <i>COQ10A</i>   | <a href="#">538821</a> | ---                                                                                                                                                                                                                                                | 0.000449 | 0.65        | Down       |
| DAZ interacting protein 3, zinc finger                                          | <i>DZIP3</i>    | <a href="#">537349</a> | ---                                                                                                                                                                                                                                                | 0.00017  | 0.65        | Down       |
| similar to DEAD/H (Asp-Glu-Ala-                                                 | <i>LOC54031</i> | <a href="#">540312</a> | ---                                                                                                                                                                                                                                                | 0.000594 | 0.65        | Down       |



| Gene Title                                                           | Gene Symbol                       | Entrez Gene            | Putative Function                                                           | P-value  | Fold Effect | Regulation |
|----------------------------------------------------------------------|-----------------------------------|------------------------|-----------------------------------------------------------------------------|----------|-------------|------------|
| Asp/His) box polypeptide 26B                                         | 2                                 |                        |                                                                             |          |             |            |
| outer dense fiber of sperm tails 2-like                              | <i>ODF2L</i>                      | <a href="#">533508</a> | ---                                                                         | 0.001921 | 0.65        | Down       |
| transmembrane protein 117                                            | <i>TMEM117</i>                    | <a href="#">614719</a> | ---                                                                         | 3.15E-05 | 0.65        | Down       |
| chondroitin polymerizing factor                                      | <i>CHPF</i>                       | <a href="#">540002</a> | ---                                                                         | 3.66E-06 | 0.65        | Down       |
| Coenzyme Q10 homolog A (S. cerevisiae)                               | <i>COQ10A</i>                     | <a href="#">538821</a> | ---                                                                         | 1.14E-05 | 0.65        | Down       |
| coiled-coil domain containing 85B                                    | <i>CCDC85B</i>                    | <a href="#">540332</a> | ---                                                                         | 0.000268 | 0.65        | Down       |
| Low density lipoprotein receptor-related protein 4                   | <i>LRP4</i>                       | <a href="#">504317</a> | ---                                                                         | 3.65E-05 | 0.65        | Down       |
| RALBP1 associated Eps domain containing 2                            | <i>REPS2</i>                      | <a href="#">526887</a> | ---                                                                         | 0.000478 | 0.65        | Down       |
| hypothetical LOC613826                                               | <i>LOC613826</i>                  | <a href="#">613826</a> | ---                                                                         | 1.52E-06 | 0.65        | Down       |
| MACRO domain containing 1                                            | <i>MACROD1</i>                    | <a href="#">613568</a> | ---                                                                         | 0.000157 | 0.65        | Down       |
| insulin-like growth factor binding protein 7                         | <i>IGFBP7</i>                     | <a href="#">616368</a> | 0001558 // regulation of cell growth // inferred from electronic annotation | 8.38E-08 | 0.65        | Down       |
| hypothetical protein LOC785375                                       | <i>LOC785375</i>                  | <a href="#">785375</a> | ---                                                                         | 5.03E-06 | 0.65        | Down       |
| similar to NAC-beta splice /// NLR family, pyrin domain containing 1 | <i>LOC528166</i> /// <i>NLRP1</i> | 528166 /// 790698      | 0006952 // defense response // inferred from electronic annotation          | 2.91E-07 | 0.65        | Down       |

| Gene Title                                                                                                                  | Gene Symbol                          | Entrez Gene             | Putative Function                                                                                                                                                                                                                                               | P-value  | Fold Effect | Regulation |
|-----------------------------------------------------------------------------------------------------------------------------|--------------------------------------|-------------------------|-----------------------------------------------------------------------------------------------------------------------------------------------------------------------------------------------------------------------------------------------------------------|----------|-------------|------------|
| similar to HOXB8                                                                                                            | <i>LOC785855</i>                     | <a href="#">785855</a>  | ---                                                                                                                                                                                                                                                             | 0.000808 | 0.65        | Down       |
| four and a half LIM domains 1                                                                                               | <i>FHL1</i>                          | <a href="#">509056</a>  | ---                                                                                                                                                                                                                                                             | 6.90E-07 | 0.65        | Down       |
| Calcium/calmodulin-dependent protein kinase II inhibitor 1                                                                  | <i>CAMK2N1</i>                       | <a href="#">616227</a>  | ---                                                                                                                                                                                                                                                             | 0.000312 | 0.65        | Down       |
| cysteine-rich secretory protein LCCL domain containing 2 /// translocase of inner mitochondrial membrane 13 homolog (yeast) | <i>CRISPLD2</i><br>/// <i>TIMM13</i> | 505329<br>///<br>516325 | 0006626 // protein targeting to mitochondrion // inferred from electronic annotation /// 0006810 // transport // inferred from electronic annotation /// 0015031 // protein transport // inferred from electronic annotation /// 0045039 // protein import into | 1.38E-06 | 0.65        | Down       |
| zinc finger protein 532                                                                                                     | <i>ZNF532</i>                        | <a href="#">533847</a>  | ---                                                                                                                                                                                                                                                             | 8.23E-07 | 0.65        | Down       |
| damage-specific DNA binding protein 1, 127kDa                                                                               | <i>DDB1</i>                          | <a href="#">511951</a>  | 0006512 // ubiquitin cycle // inferred from electronic annotation                                                                                                                                                                                               | 1.13E-06 | 0.65        | Down       |
| melanoma antigen family D, 1                                                                                                | <i>MGC128691</i>                     | <a href="#">512562</a>  | ---                                                                                                                                                                                                                                                             | 3.09E-07 | 0.65        | Down       |
| microfibrillar-associated protein 2                                                                                         | <i>MFAP2</i>                         | <a href="#">281912</a>  | ---                                                                                                                                                                                                                                                             | 0.000216 | 0.65        | Down       |
| spondin 2, extracellular matrix protein                                                                                     | <i>SPON2</i>                         | <a href="#">513844</a>  | 0007155 // cell adhesion // inferred from electronic annotation /// 0007275 // multicellular organismal development // inferred from electronic annotation                                                                                                      | 0.000186 | 0.65        | Down       |

| Gene Title                                                  | Gene Symbol                    | Entrez Gene             | Putative Function                                                                                                                                                                                                                                                    | P-value  | Fold Effect | Regulation |
|-------------------------------------------------------------|--------------------------------|-------------------------|----------------------------------------------------------------------------------------------------------------------------------------------------------------------------------------------------------------------------------------------------------------------|----------|-------------|------------|
| protein tyrosine phosphatase, receptor type, S              | <i>PTPRS</i>                   | <a href="#">537480</a>  | ---                                                                                                                                                                                                                                                                  | 2.36E-05 | 0.65        | Down       |
| transmembrane protein 135                                   | <i>TMEM135</i>                 | <a href="#">523885</a>  | ---                                                                                                                                                                                                                                                                  | 1.74E-08 | 0.66        | Down       |
| breast cancer metastasis-suppressor 1-like                  | <i>BRMS1L</i>                  | <a href="#">514432</a>  | 0001558 // regulation of cell growth // inferred from electronic annotation ///<br>0006350 // transcription // inferred from electronic annotation ///<br>0006355 // regulation of transcription, DNA-dependent // inferred from electronic annotation               | 1.14E-05 | 0.66        | Down       |
| eukaryotic translation initiation factor 2C, 1              | <i>EIF2C1</i>                  | <a href="#">522972</a>  | ---                                                                                                                                                                                                                                                                  | 4.65E-10 | 0.66        | Down       |
| uracil-DNA glycosylase                                      | <i>UNG</i>                     | <a href="#">511381</a>  | 0006281 // DNA repair // inferred from electronic annotation ///<br>0006284 // base-excision repair // inferred from electronic annotation ///<br>0006974 // response to DNA damage stimulus // inferred from electronic annotation /// 0008152 // metabolic process | 0.000251 | 0.66        | Down       |
| gamma-glutamyltransferase 1 /// gamma-glutamyltransferase 5 | <i>GGT1</i> ///<br><i>GGT5</i> | 615582<br>///<br>787326 | ---                                                                                                                                                                                                                                                                  | 4.11E-05 | 0.66        | Down       |
| small EDRK-rich factor 2                                    | <i>SERF2</i>                   | <a href="#">527852</a>  | ---                                                                                                                                                                                                                                                                  | 8.63E-08 | 0.66        | Down       |
| tetraspanin 6                                               | <i>TSPAN6</i>                  | <a href="#">514741</a>  | ---                                                                                                                                                                                                                                                                  | 2.62E-08 | 0.66        | Down       |

| Gene Title                                                            | Gene Symbol      | Entrez Gene            | Putative Function                                                                                                                                                                                                                                               | P-value  | Fold Effect | Regulation |
|-----------------------------------------------------------------------|------------------|------------------------|-----------------------------------------------------------------------------------------------------------------------------------------------------------------------------------------------------------------------------------------------------------------|----------|-------------|------------|
| hypothetical LOC617871                                                | <i>LOC617871</i> | <a href="#">617871</a> | ---                                                                                                                                                                                                                                                             | 0.0005   | 0.66        | Down       |
| spondin 1, extracellular matrix protein                               | <i>SPON1</i>     | <a href="#">282866</a> | 0007155 // cell adhesion // inferred from electronic annotation /// 0007275 // multicellular organismal development // inferred from electronic annotation                                                                                                      | 0.000214 | 0.66        | Down       |
| DNA-damage-inducible transcript 4-like                                | <i>DDIT4L</i>    | <a href="#">510906</a> | 0009968 // negative regulation of signal transduction // inferred from electronic annotation                                                                                                                                                                    | 0.00851  | 0.66        | Down       |
| Stabilin 1                                                            | <i>STAB1</i>     | <a href="#">505543</a> | 0007155 // cell adhesion // inferred from electronic annotation                                                                                                                                                                                                 | 0.000641 | 0.66        | Down       |
| similar to versican V0 splice-variant 4                               | <i>LOC786374</i> | <a href="#">786374</a> | ---                                                                                                                                                                                                                                                             | 0.000578 | 0.66        | Down       |
| Tctex1 domain containing 2                                            | <i>TCTEX1D2</i>  | <a href="#">504554</a> | ---                                                                                                                                                                                                                                                             | 0.001556 | 0.66        | Down       |
| protein phosphatase 3 (formerly 2B), catalytic subunit, alpha isoform | <i>PPP3CA</i>    | <a href="#">286852</a> | 0000082 // G1/S transition of mitotic cell cycle // inferred from electronic annotation /// 0006606 // protein import into nucleus // inferred from electronic annotation /// 0006816 // calcium ion transport // inferred from electronic annotation /// 00069 | 1.76E-10 | 0.66        | Down       |
| kelch-like 10 (Drosophila)                                            | <i>KLHL10</i>    | <a href="#">541263</a> | ---                                                                                                                                                                                                                                                             | 1.26E-05 | 0.66        | Down       |
| secreted frizzled-related protein 2                                   | <i>SFRP2</i>     | <a href="#">510821</a> | 0007275 // multicellular organismal                                                                                                                                                                                                                             | 0.000376 | 0.66        | Down       |

| Gene Title                                                          | Gene Symbol      | Entrez Gene            | Putative Function                                                                                                                                                                                                                                                | P-value  | Fold Effect | Regulation |
|---------------------------------------------------------------------|------------------|------------------------|------------------------------------------------------------------------------------------------------------------------------------------------------------------------------------------------------------------------------------------------------------------|----------|-------------|------------|
|                                                                     |                  |                        | development // inferred from electronic annotation /// 0016055 // Wnt receptor signaling pathway // inferred from electronic annotation                                                                                                                          |          |             |            |
| anthrax toxin receptor 2                                            | <i>ANTXR2</i>    | <a href="#">510080</a> | ---                                                                                                                                                                                                                                                              | 0.006699 | 0.66        | Down       |
| hypothetical LOC614402                                              | <i>LOC614402</i> | <a href="#">614402</a> | ---                                                                                                                                                                                                                                                              | 0.000185 | 0.66        | Down       |
| DTW domain containing 1                                             | <i>DTWD1</i>     | <a href="#">540840</a> | ---                                                                                                                                                                                                                                                              | 9.56E-09 | 0.66        | Down       |
| Development and differentiation enhancing factor-like 1             | <i>DDEFL1</i>    | <a href="#">523797</a> | 0005975 // carbohydrate metabolic process // inferred from electronic annotation /// 0019752 // carboxylic acid metabolic process // inferred from electronic annotation /// 0032312 // regulation of ARF GTPase activity // inferred from electronic annotation | 7.15E-07 | 0.66        | Down       |
| matrix metalloproteinase 11 (stromelysin 3)                         | <i>MMP11</i>     | <a href="#">539109</a> | 0006508 // proteolysis // inferred from electronic annotation                                                                                                                                                                                                    | 0.00037  | 0.66        | Down       |
| chaperone, ABC1 activity of bc1 complex homolog (S. pombe)          | <i>CABC1</i>     | <a href="#">536925</a> | ---                                                                                                                                                                                                                                                              | 1.32E-06 | 0.66        | Down       |
| ephrin-A2                                                           | <i>EFNA2</i>     | <a href="#">614453</a> | ---                                                                                                                                                                                                                                                              | 0.000273 | 0.66        | Down       |
| PDZ and LIM domain 4                                                | <i>PDLIM4</i>    | <a href="#">515410</a> | ---                                                                                                                                                                                                                                                              | 9.91E-11 | 0.66        | Down       |
| GRP1 (general receptor for phosphoinositides 1)-associated scaffold | <i>GRASP</i>     | <a href="#">507181</a> | ---                                                                                                                                                                                                                                                              | 0.000192 | 0.66        | Down       |

| Gene Title                                                                         | Gene Symbol      | Entrez Gene            | Putative Function                                                                                                                                                                                                                                               | P-value  | Fold Effect | Regulation |
|------------------------------------------------------------------------------------|------------------|------------------------|-----------------------------------------------------------------------------------------------------------------------------------------------------------------------------------------------------------------------------------------------------------------|----------|-------------|------------|
| protein                                                                            |                  |                        |                                                                                                                                                                                                                                                                 |          |             |            |
| fumarylacetoacetate hydrolase (fumarylacetoacetase)                                | <i>FAH</i>       | <a href="#">508724</a> | 0006559 // L-phenylalanine catabolic process // inferred from electronic annotation /// 0006572 // tyrosine catabolic process // inferred from electronic annotation /// 0008152 // metabolic process // inferred from electronic annotation /// 0009072 // aro | 0.003537 | 0.66        | Down       |
| EGF-like-domain, multiple 7                                                        | <i>EGFL7</i>     | <a href="#">613671</a> | ---                                                                                                                                                                                                                                                             | 0.000111 | 0.66        | Down       |
| Membrane-associated ring finger (C3HC4) 6                                          | <i>MAR6</i>      | <a href="#">540371</a> | ---                                                                                                                                                                                                                                                             | 4.81E-10 | 0.66        | Down       |
| SUMO1/sentrin specific peptidase 6                                                 | <i>SENP6</i>     | <a href="#">533853</a> | ---                                                                                                                                                                                                                                                             | 8.82E-05 | 0.66        | Down       |
| collagen, type III, alpha 1 (Ehlers-Danlos syndrome type IV, autosomal dominant)   | <i>COL3A1</i>    | <a href="#">510833</a> | 0006817 // phosphate transport // inferred from electronic annotation /// 0007186 // G-protein coupled receptor protein signaling pathway // inferred from electronic annotation                                                                                | 6.87E-08 | 0.66        | Down       |
| Melanoma associated antigen (mutated) 1                                            | <i>MUM1</i>      | <a href="#">513471</a> | ---                                                                                                                                                                                                                                                             | 4.57E-06 | 0.66        | Down       |
| Hypothetical protein LOC782307                                                     | <i>LOC782307</i> | <a href="#">782307</a> | ---                                                                                                                                                                                                                                                             | 8.49E-06 | 0.66        | Down       |
| UDP-N-acetyl-alpha-D-galactosamine:polypeptide N-acetylgalactosaminyltransferase 1 | <i>GALNT1</i>    | <a href="#">282241</a> | 0006493 // protein amino acid O-linked glycosylation // inferred from electronic annotation                                                                                                                                                                     | 0.002422 | 0.66        | Down       |

| Gene Title                                                                               | Gene Symbol      | Entrez Gene            | Putative Function                                                                                                                                                                                                                                             | P-value  | Fold Effect | Regulation |
|------------------------------------------------------------------------------------------|------------------|------------------------|---------------------------------------------------------------------------------------------------------------------------------------------------------------------------------------------------------------------------------------------------------------|----------|-------------|------------|
| (GalNAc-T1)                                                                              |                  |                        |                                                                                                                                                                                                                                                               |          |             |            |
| cytoplasmic linker associated protein 2                                                  | <i>CLASP2</i>    | <a href="#">531418</a> | ---                                                                                                                                                                                                                                                           | 0.000453 | 0.66        | Down       |
| beta-site APP-cleaving enzyme 1                                                          | <i>BACE1</i>     | <a href="#">614333</a> | 0006508 // proteolysis // inferred from electronic annotation                                                                                                                                                                                                 | 0.006438 | 0.66        | Down       |
| tubulin tyrosine ligase-like family, member 3                                            | <i>TTL3</i>      | <a href="#">531866</a> | 0006464 // protein modification process // inferred from electronic annotation                                                                                                                                                                                | 2.25E-07 | 0.66        | Down       |
| sirtuin (silent mating type information regulation 2 homolog) 3 ( <i>S. cerevisiae</i> ) | <i>SIRT3</i>     | <a href="#">614027</a> | 0006342 // chromatin silencing // inferred from electronic annotation /// 0006355 // regulation of transcription, DNA-dependent // inferred from electronic annotation /// 0006476 // protein amino acid deacetylation // inferred from electronic annotation | 8.93E-06 | 0.66        | Down       |
| receptor (G protein-coupled) activity modifying protein 2                                | <i>RAMP2</i>     | <a href="#">504230</a> | 0006886 // intracellular protein transport // inferred from electronic annotation /// 0008277 // regulation of G-protein coupled receptor protein signaling pathway // inferred from electronic annotation                                                    | 4.22E-06 | 0.66        | Down       |
| hypothetical LOC533774                                                                   | <i>LOC533774</i> | <a href="#">533774</a> | ---                                                                                                                                                                                                                                                           | 7.58E-08 | 0.66        | Down       |
| prostaglandin E receptor 4 (subtype EP4)                                                 | <i>PTGER4</i>    | <a href="#">282331</a> | 0007165 // signal transduction // inferred from electronic annotation /// 0007186 // G-protein coupled receptor protein signaling pathway //                                                                                                                  | 0.004571 | 0.66        | Down       |

| Gene Title                                                                                                                           | Gene Symbol                                     | Entrez Gene             | Putative Function                                                                                                                                                                | P-value  | Fold Effect | Regulation |
|--------------------------------------------------------------------------------------------------------------------------------------|-------------------------------------------------|-------------------------|----------------------------------------------------------------------------------------------------------------------------------------------------------------------------------|----------|-------------|------------|
| inferred from electronic annotation                                                                                                  |                                                 |                         |                                                                                                                                                                                  |          |             |            |
| metastasis suppressor 1 /// similar to Metastasis suppressor protein 1 (Missing in metastasis protein) (Metastasis suppressor YGL-1) | <i>LOC78849</i><br><i>9</i> /// <i>MTSS1</i>    | 523498<br>///<br>788499 | ---                                                                                                                                                                              | 7.65E-07 | 0.66        | Down       |
| microtubule-associated protein 1A                                                                                                    | <i>MAP1A</i>                                    | <a href="#">515593</a>  | ---                                                                                                                                                                              | 0.00084  | 0.66        | Down       |
| solute carrier family 16, member 3 (monocarboxylic acid transporter 4)                                                               | <i>SLC16A3</i>                                  | <a href="#">510085</a>  | ---                                                                                                                                                                              | 0.008446 | 0.66        | Down       |
| similar to OB-cadherin-1 /// cadherin 11, type 2, OB-cadherin (osteoblast)                                                           | <i>CDH11</i> ///<br><i>LOC53536</i><br><i>3</i> | 535363<br>///<br>785475 | 0007155 // cell adhesion // inferred from electronic annotation ///<br>0007156 // homophilic cell adhesion // inferred from electronic annotation                                | 0.000103 | 0.66        | Down       |
| McKusick-Kaufman syndrome                                                                                                            | <i>MKKS</i>                                     | <a href="#">614288</a>  | 0006457 // protein folding // inferred from electronic annotation                                                                                                                | 5.53E-05 | 0.66        | Down       |
| platelet endothelial aggregation receptor 1                                                                                          | <i>PEAR1</i>                                    | <a href="#">787112</a>  | ---                                                                                                                                                                              | 0.001594 | 0.66        | Down       |
| galactose-1-phosphate uridylyltransferase                                                                                            | <i>GALT</i>                                     | <a href="#">506997</a>  | 0005975 // carbohydrate metabolic process // inferred from electronic annotation /// 0006012 // galactose metabolic process // inferred from electronic annotation               | 2.75E-07 | 0.66        | Down       |
| serpin peptidase inhibitor, clade F (alpha-2 antiplasmin, pigment epithelium derived factor), member 1                               | <i>SERPINF1</i>                                 | <a href="#">281386</a>  | 0016525 // negative regulation of angiogenesis // inferred from electronic annotation /// 0050769 // positive regulation of neurogenesis // inferred from sequence or structural | 2.40E-05 | 0.66        | Down       |



| Gene Title                                                | Gene Symbol                          | Entrez Gene            | Putative Function                                                                                                                                                                          | P-value  | Fold Effect | Regulation |
|-----------------------------------------------------------|--------------------------------------|------------------------|--------------------------------------------------------------------------------------------------------------------------------------------------------------------------------------------|----------|-------------|------------|
|                                                           |                                      |                        | similarity /// 0050769 // positive regulation of neurogenesis // inferred from                                                                                                             |          |             |            |
| family with sequence similarity 109, member B             | <i>FAM109B</i>                       | <a href="#">506148</a> | ---                                                                                                                                                                                        | 0.000241 | 0.66        | Down       |
| hypothetical LOC529053                                    | <i>LOC529053</i>                     | <a href="#">529053</a> | ---                                                                                                                                                                                        | 3.37E-05 | 0.67        | Down       |
| matrix-remodelling associated 7                           | <i>MXRA7</i>                         | <a href="#">617087</a> | ---                                                                                                                                                                                        | 2.92E-05 | 0.67        | Down       |
| junctional adhesion molecule 2                            | <i>JAM2</i>                          | <a href="#">538846</a> | ---                                                                                                                                                                                        | 0.000222 | 0.67        | Down       |
| similar to BCL-6 corepressor                              | <i>LOC541088</i><br><i>LOC784529</i> | 541088<br>784529       | ---                                                                                                                                                                                        | 0.000758 | 0.67        | Down       |
| cyclin-dependent kinase inhibitor 2C (p18, inhibits CDK4) | <i>CDKN2C</i>                        | <a href="#">505691</a> | ---                                                                                                                                                                                        | 0.000214 | 0.67        | Down       |
| Hypothetical protein LOC784805                            | <i>LOC784805</i>                     | <a href="#">784805</a> | ---                                                                                                                                                                                        | 3.08E-06 | 0.67        | Down       |
| abhydrolase domain containing 2                           | <i>ABHD2</i>                         | <a href="#">508717</a> | 0009611 // response to wounding // inferred from sequence or structural similarity /// 0030336 // negative regulation of cell migration // inferred from sequence or structural similarity | 2.24E-05 | 2.00        | Up         |
| DnaJ (Hsp40) homolog, subfamily A,                        | <i>DNAJA1</i>                        | <a href="#">528862</a> | 0006457 // protein folding // inferred                                                                                                                                                     | 1.33E-06 | 2.00        | Up         |

| Gene Title                                                                        | Gene Symbol      | Entrez Gene            | Putative Function                                                                                                                                                | P-value  | Fold Effect | Regulation |
|-----------------------------------------------------------------------------------|------------------|------------------------|------------------------------------------------------------------------------------------------------------------------------------------------------------------|----------|-------------|------------|
| member 1                                                                          |                  |                        | from electronic annotation                                                                                                                                       |          |             |            |
| atlastin 3                                                                        | <i>ATL3</i>      | <a href="#">515124</a> | 0006955 // immune response // inferred from electronic annotation                                                                                                | 1.81E-08 | 2.00        | Up         |
| aldehyde dehydrogenase 5 family, member A1 (succinate-semialdehyde dehydrogenase) | <i>ALDH5A1</i>   | <a href="#">532724</a> | 0008152 // metabolic process // inferred from electronic annotation                                                                                              | 0.007179 | 2.01        | Up         |
| Similar to LFA-3                                                                  | <i>LOC782186</i> | <a href="#">782186</a> | ---                                                                                                                                                              | 3.27E-05 | 2.01        | Up         |
| interferon regulatory factor 8                                                    | <i>IRF8</i>      | <a href="#">614909</a> | 0006350 // transcription // inferred from electronic annotation /// 0006355 // regulation of transcription, DNA-dependent // inferred from electronic annotation | 1.47E-06 | 2.01        | Up         |
| chemokine (C-X-C motif) ligand 2                                                  | <i>CXCL2</i>     | <a href="#">281212</a> | 0006954 // inflammatory response // inferred from electronic annotation /// 0006955 // immune response // inferred from electronic annotation                    | 0.008841 | 2.02        | Up         |
| Solute carrier family 25, member 30                                               | <i>SLC25A30</i>  | <a href="#">507021</a> | 0006810 // transport // inferred from electronic annotation /// 0006839 // mitochondrial transport // inferred from electronic annotation                        | 1.29E-09 | 2.02        | Up         |
| 3'(2'), 5'-bisphosphate nucleotidase 1                                            | <i>BPNT1</i>     | <a href="#">521254</a> | ---                                                                                                                                                              | 6.94E-10 | 2.02        | Up         |
| Transmembrane protein 53                                                          | <i>TMEM53</i>    | <a href="#">540738</a> | ---                                                                                                                                                              | 2.31E-06 | 2.02        | Up         |

| Gene Title                                                         | Gene Symbol      | Entrez Gene            | Putative Function                                                                                                                                                                                                                                               | P-value  | Fold Effect | Regulation |
|--------------------------------------------------------------------|------------------|------------------------|-----------------------------------------------------------------------------------------------------------------------------------------------------------------------------------------------------------------------------------------------------------------|----------|-------------|------------|
| DnaJ (Hsp40) homolog, subfamily C, member 1                        | <i>DNAJC1</i>    | <a href="#">510387</a> | ---                                                                                                                                                                                                                                                             | 2.19E-11 | 2.02        | Up         |
| valosin containing protein (p97)/p47 complex interacting protein 1 | <i>VCPIP1</i>    | <a href="#">539643</a> | ---                                                                                                                                                                                                                                                             | 5.00E-11 | 2.02        | Up         |
| protein kinase C, delta                                            | <i>PRKCD</i>     | <a href="#">505708</a> | 0006468 // protein amino acid phosphorylation // inferred from electronic annotation /// 0007242 // intracellular signaling cascade // inferred from electronic annotation                                                                                      | 2.84E-05 | 2.02        | Up         |
| Similar to RAD21-like 1 (S. pombe)                                 | <i>LOC512408</i> | <a href="#">512408</a> | ---                                                                                                                                                                                                                                                             | 0.000922 | 2.03        | Up         |
| deoxyribonuclease II, lysosomal                                    | <i>DNASE2</i>    | <a href="#">282218</a> | 0006259 // DNA metabolic process // inferred from electronic annotation /// 0006308 // DNA catabolic process // inferred from electronic annotation /// 0006915 // apoptosis // inferred from electronic annotation /// 0007275 // multicellular organismal dev | 1.88E-07 | 2.04        | Up         |
| Vestigial like 1 (Drosophila)                                      | <i>VGLL1</i>     | <a href="#">613549</a> | 0045449 // regulation of transcription // inferred from electronic annotation                                                                                                                                                                                   | 0.006553 | 2.05        | Up         |
| Ras association (RalGDS/AF-6) domain family member 1               | <i>RASSF1</i>    | <a href="#">510276</a> | 0007165 // signal transduction // inferred from electronic annotation /// 0007242 // intracellular signaling cascade // inferred from electronic annotation                                                                                                     | 2.54E-10 | 2.06        | Up         |

| Gene Title                                                                             | Gene Symbol      | Entrez Gene            | Putative Function                                                                                                                                                                                                                                                        | P-value  | Fold Effect | Regulation |
|----------------------------------------------------------------------------------------|------------------|------------------------|--------------------------------------------------------------------------------------------------------------------------------------------------------------------------------------------------------------------------------------------------------------------------|----------|-------------|------------|
| cadherin 1, type 1, E-cadherin (epithelial)                                            | <i>CDH1</i>      | <a href="#">282637</a> | 0007155 // cell adhesion // inferred from electronic annotation ///<br>0007156 // homophilic cell adhesion // inferred from electronic annotation ///<br>0016337 // cell-cell adhesion // inferred from electronic annotation ///<br>0019538 // protein metabolic proces | 0.004911 | 2.06        | Up         |
| serpin peptidase inhibitor, clade G (C1 inhibitor), member 1, (angioedema, hereditary) | <i>SERPING1</i>  | <a href="#">281035</a> | 0007596 // blood coagulation // inferred from electronic annotation                                                                                                                                                                                                      | 8.30E-06 | 2.07        | Up         |
| adenylate kinase 2                                                                     | <i>AK2</i>       | <a href="#">280716</a> | 0006139 // nucleobase, nucleoside, nucleotide and nucleic acid metabolic process // inferred from electronic annotation                                                                                                                                                  | 1.82E-06 | 2.08        | Up         |
| similar to eyes absent 3                                                               | <i>LOC514364</i> | <a href="#">514364</a> | 0007275 // multicellular organismal development // inferred from electronic annotation ///<br>0008152 // metabolic process // inferred from electronic annotation                                                                                                        | 1.07E-05 | 2.08        | Up         |
| interferon regulatory factor 6                                                         | <i>IRF6</i>      | <a href="#">614253</a> | 0006350 // transcription // inferred from electronic annotation ///<br>0006355 // regulation of transcription, DNA-dependent // inferred from electronic annotation                                                                                                      | 7.59E-07 | 2.08        | Up         |
| similar to squamous cell-specific protein                                              | <i>LOC786490</i> | <a href="#">786490</a> | ---                                                                                                                                                                                                                                                                      | 1.23E-06 | 2.09        | Up         |

| Gene Title                                                      | Gene Symbol      | Entrez Gene            | Putative Function                                                                                                                                                                                                         | P-value  | Fold Effect | Regulation |
|-----------------------------------------------------------------|------------------|------------------------|---------------------------------------------------------------------------------------------------------------------------------------------------------------------------------------------------------------------------|----------|-------------|------------|
| complement factor properdin                                     | <i>CFP</i>       | <a href="#">539605</a> | ---                                                                                                                                                                                                                       | 7.74E-06 | 2.09        | Up         |
| Nicotinamide phosphoribosyltransferase                          | <i>NAMPT</i>     | <a href="#">520472</a> | ---                                                                                                                                                                                                                       | 1.58E-07 | 2.09        | Up         |
| eukaryotic translation termination factor 1                     | <i>ETF1</i>      | <a href="#">541077</a> | 0006412 // translation // inferred from electronic annotation /// 0006415 // translational termination // inferred from electronic annotation                                                                             | 4.93E-07 | 2.10        | Up         |
| brain abundant, membrane attached signal protein 1              | <i>BASP1</i>     | <a href="#">286842</a> | ---                                                                                                                                                                                                                       | 8.74E-07 | 2.10        | Up         |
| Tripartite motif-containing 25                                  | <i>TRIM25</i>    | <a href="#">510923</a> | ---                                                                                                                                                                                                                       | 0.000205 | 2.10        | Up         |
| arrestin, beta 1                                                | <i>ARRB1</i>     | <a href="#">281637</a> | 0007165 // signal transduction // inferred from electronic annotation /// 0007600 // sensory perception // inferred from electronic annotation /// 0050896 // response to stimulus // inferred from electronic annotation | 3.09E-07 | 2.10        | Up         |
| MIT, microtubule interacting and transport, domain containing 1 | <i>MITD1</i>     | <a href="#">504291</a> | ---                                                                                                                                                                                                                       | 1.97E-07 | 2.10        | Up         |
| Hypothetical LOC511953                                          | <i>LOC511953</i> | <a href="#">511953</a> | ---                                                                                                                                                                                                                       | 3.54E-06 | 2.10        | Up         |
| ubiquitin D                                                     | <i>UBD</i>       | <a href="#">504548</a> | 0006464 // protein modification process // inferred from electronic annotation                                                                                                                                            | 0.008696 | 2.11        | Up         |
| Hypothetical LOC533333                                          | <i>MGC13910</i>  | <a href="#">533333</a> | ---                                                                                                                                                                                                                       | 3.33E-06 | 2.11        | Up         |

| Gene Title                                                         | Gene Symbol    | Entrez Gene            | Putative Function                                                                                                                                                   | P-value  | Fold Effect | Regulation |
|--------------------------------------------------------------------|----------------|------------------------|---------------------------------------------------------------------------------------------------------------------------------------------------------------------|----------|-------------|------------|
|                                                                    | 9              |                        |                                                                                                                                                                     |          |             |            |
| FYVE, RhoGEF and PH domain containing 2                            | <i>FGD2</i>    | <a href="#">512593</a> | 0035023 // regulation of Rho protein signal transduction // inferred from electronic annotation                                                                     | 1.67E-06 | 2.11        | Up         |
| protein phosphatase 2 (formerly 2A), regulatory subunit B", gamma  | <i>PPP2R3C</i> | <a href="#">533147</a> | ---                                                                                                                                                                 | 1.47E-08 | 2.12        | Up         |
| serine/threonine kinase 17a                                        | <i>STK17A</i>  | <a href="#">513665</a> | 0006468 // protein amino acid phosphorylation // inferred from electronic annotation                                                                                | 3.43E-05 | 2.12        | Up         |
| fibromodulin                                                       | <i>FMOD</i>    | <a href="#">281168</a> | ---                                                                                                                                                                 | 6.43E-07 | 2.12        | Up         |
| asparagine-linked glycosylation 14 homolog                         | <i>ALG14</i>   | <a href="#">506537</a> | ---                                                                                                                                                                 | 3.69E-06 | 2.13        | Up         |
| apoptosis-inducing factor, mitochondrion-associated, 1             | <i>AIFM1</i>   | <a href="#">535714</a> | 0045454 // cell redox homeostasis // inferred from electronic annotation                                                                                            | 5.20E-11 | 2.13        | Up         |
| interferon regulatory factor 6                                     | <i>IRF6</i>    | <a href="#">614253</a> | 0006350 // transcription // inferred from electronic annotation ///<br>0006355 // regulation of transcription, DNA-dependent // inferred from electronic annotation | 3.12E-06 | 2.13        | Up         |
| DIM1 dimethyladenosine transferase 1-like ( <i>S. cerevisiae</i> ) | <i>DIMT1L</i>  | <a href="#">509725</a> | 0000154 // rRNA modification // inferred from electronic annotation ///<br>0006364 // rRNA processing // inferred from electronic annotation                        | 5.85E-07 | 2.13        | Up         |

| Gene Title                                                                        | Gene Symbol                       | Entrez Gene            | Putative Function                                                                                                                                                                                                                                               | P-value  | Fold Effect | Regulation |
|-----------------------------------------------------------------------------------|-----------------------------------|------------------------|-----------------------------------------------------------------------------------------------------------------------------------------------------------------------------------------------------------------------------------------------------------------|----------|-------------|------------|
| growth arrest and DNA-damage-inducible, beta                                      | <i>GADD45B</i>                    | <a href="#">618405</a> | 0000186 // activation of MAPKK activity // inferred from electronic annotation /// 0006469 // negative regulation of protein kinase activity // inferred from electronic annotation /// 0006915 // apoptosis // inferred from electronic annotation /// 0007275 | 3.31E-09 | 2.14        | Up         |
| ATP-binding cassette, sub-family C (CFTR/MRP), member 3                           | <i>ABCC3</i>                      | <a href="#">533151</a> | 0006810 // transport // inferred from electronic annotation                                                                                                                                                                                                     | 4.62E-09 | 2.14        | Up         |
| sestrin 2                                                                         | <i>SESN2</i>                      | <a href="#">509863</a> | 0007050 // cell cycle arrest // inferred from electronic annotation                                                                                                                                                                                             | 4.76E-09 | 2.14        | Up         |
| tripartite motif-containing 38                                                    | <i>TRIM38</i>                     | <a href="#">531022</a> | 0016567 // protein ubiquitination // inferred from electronic annotation                                                                                                                                                                                        | 1.68E-12 | 2.14        | Up         |
| Caspase 1, apoptosis-related cysteine peptidase (interleukin 1, beta, convertase) | <i>CASP1</i>                      | <a href="#">514214</a> | 0006508 // proteolysis // inferred from electronic annotation /// 0006915 // apoptosis // inferred from electronic annotation /// 0042981 // regulation of apoptosis // inferred from electronic annotation                                                     | 8.26E-06 | 2.15        | Up         |
| signal-regulatory protein alpha /// similar to MyD-1 antigen                      | <i>LOC782991</i> /// <i>SIRPA</i> | 327666 /// 782991      | ---                                                                                                                                                                                                                                                             | 5.37E-06 | 2.15        | Up         |
| chromosome 3 open reading frame 38 ortholog                                       | <i>CIH3ORF38</i>                  | <a href="#">511707</a> | 0006508 // proteolysis // inferred from electronic annotation                                                                                                                                                                                                   | 1.22E-12 | 2.15        | Up         |
| DEAD (Asp-Glu-Ala-As) box polypeptide                                             | <i>DDX19B</i>                     | <a href="#">517438</a> | ---                                                                                                                                                                                                                                                             | 6.31E-08 | 2.16        | Up         |

| Gene Title                                                           | Gene Symbol     | Entrez Gene            | Putative Function                                                                                                                                                                                                                                               | P-value  | Fold Effect | Regulation |
|----------------------------------------------------------------------|-----------------|------------------------|-----------------------------------------------------------------------------------------------------------------------------------------------------------------------------------------------------------------------------------------------------------------|----------|-------------|------------|
| 19B                                                                  |                 |                        |                                                                                                                                                                                                                                                                 |          |             |            |
| interferon induced transmembrane protein 3 (1-8U)                    | <i>IFITM3</i>   | <a href="#">282255</a> | 0009607 // response to biotic stimulus // inferred from electronic annotation                                                                                                                                                                                   | 5.62E-11 | 2.16        | Up         |
| major histocompatibility complex, class II, DM beta-chain, expressed | <i>BOLA-DMB</i> | <a href="#">282491</a> | 0002504 // antigen processing and presentation of peptide or polysaccharide antigen via MHC class II // inferred from electronic annotation /// 0006955 // immune response // inferred from electronic annotation /// 0019882 // antigen processing and present | 1.72E-08 | 2.17        | Up         |
| transmembrane protein 79                                             | <i>TMEM79</i>   | <a href="#">513599</a> | ---                                                                                                                                                                                                                                                             | 3.46E-06 | 2.17        | Up         |
| nuclear receptor subfamily 4, group A, member 1                      | <i>NR4A1</i>    | <a href="#">528390</a> | 0006350 // transcription // inferred from electronic annotation /// 0006355 // regulation of transcription, DNA-dependent // inferred from electronic annotation                                                                                                | 0.000153 | 2.18        | Up         |
| karyopherin alpha 2 (RAG cohort 1, importin alpha 1)                 | <i>KPNA2</i>    | <a href="#">513592</a> | 0006606 // protein import into nucleus // inferred from electronic annotation /// 0006886 // intracellular protein transport // inferred from electronic annotation                                                                                             | 8.54E-08 | 2.18        | Up         |
| hematopoietic cell-specific Lyn substrate 1                          | <i>HCLS1</i>    | <a href="#">508445</a> | 0008284 // positive regulation of cell proliferation // inferred from sequence or structural similarity /// 0009725 // response to hormone stimulus //                                                                                                          | 0.00023  | 2.19        | Up         |



| Gene Title                                              | Gene Symbol   | Entrez Gene            | Putative Function                                                                                                                                                                                                                                  | P-value  | Fold Effect | Regulation |
|---------------------------------------------------------|---------------|------------------------|----------------------------------------------------------------------------------------------------------------------------------------------------------------------------------------------------------------------------------------------------|----------|-------------|------------|
|                                                         |               |                        | inferred from sequence or structural similarity /// 0030218 // erythrocyte differentiation // inferred f                                                                                                                                           |          |             |            |
| hexosaminidase B (beta polypeptide)                     | <i>HEXB</i>   | <a href="#">618571</a> | 0005975 // carbohydrate metabolic process // inferred from electronic annotation                                                                                                                                                                   | 2.31E-05 | 2.20        | Up         |
| adipose differentiation-related protein                 | <i>ADFP</i>   | <a href="#">280981</a> | ---                                                                                                                                                                                                                                                | 1.36E-06 | 2.20        | Up         |
| C-type lectin domain family 2, member D                 | <i>CLEC2D</i> | <a href="#">617565</a> | ---                                                                                                                                                                                                                                                | 1.53E-05 | 2.20        | Up         |
| sestrin 2                                               | <i>SESN2</i>  | <a href="#">509863</a> | 0007050 // cell cycle arrest // inferred from electronic annotation                                                                                                                                                                                | 2.95E-12 | 2.21        | Up         |
| Synaptotagmin-like 3                                    | <i>SYTL3</i>  | <a href="#">506884</a> | ---                                                                                                                                                                                                                                                | 0.003314 | 2.21        | Up         |
| StAR-related lipid transfer (START) domain containing 5 | <i>STARD5</i> | <a href="#">512369</a> | 0006810 // transport // inferred from electronic annotation /// 0006869 // lipid transport // inferred from electronic annotation                                                                                                                  | 2.46E-09 | 2.21        | Up         |
| megakaryocyte-associated tyrosine kinase                | <i>MATK</i>   | <a href="#">504668</a> | 0006468 // protein amino acid phosphorylation // inferred from electronic annotation                                                                                                                                                               | 0.000441 | 2.21        | Up         |
| ADP-ribosylation factor 3                               | <i>ARF3</i>   | <a href="#">510994</a> | 0006810 // transport // inferred from electronic annotation /// 0007264 // small GTPase mediated signal transduction // inferred from electronic annotation /// 0015031 // protein transport // inferred from electronic annotation /// 0016192 // | 3.08E-11 | 2.21        | Up         |

| Gene Title                                                                                | Gene Symbol    | Entrez Gene            | Putative Function                                                                                                                                                                                                                                               | P-value  | Fold Effect | Regulation |
|-------------------------------------------------------------------------------------------|----------------|------------------------|-----------------------------------------------------------------------------------------------------------------------------------------------------------------------------------------------------------------------------------------------------------------|----------|-------------|------------|
| vesicle-medi                                                                              |                |                        |                                                                                                                                                                                                                                                                 |          |             |            |
| hematopoietic cell-specific Lyn substrate 1                                               | <i>HCLS1</i>   | <a href="#">508445</a> | 0008284 // positive regulation of cell proliferation // inferred from sequence or structural similarity /// 0009725 // response to hormone stimulus // inferred from sequence or structural similarity /// 0030218 // erythrocyte differentiation // inferred f | 0.000384 | 2.21        | Up         |
| proteasome (prosome, macropain) subunit, beta type, 9 (large multifunctional peptidase 2) | <i>PSMB9</i>   | <a href="#">510593</a> | 0006511 // ubiquitin-dependent protein catabolic process // inferred from electronic annotation /// 0006955 // immune response // inferred from electronic annotation                                                                                           | 6.14E-10 | 2.22        | Up         |
| Collagen, type XVIII, alpha 1                                                             | <i>COL18A1</i> | <a href="#">508076</a> | 0006817 // phosphate transport // inferred from electronic annotation /// 0007155 // cell adhesion // inferred from electronic annotation                                                                                                                       | 3.68E-08 | 2.22        | Up         |
| plakophilin 1 (ectodermal dysplasia/skin fragility syndrome)                              | <i>PKP1</i>    | <a href="#">281405</a> | 0007155 // cell adhesion // inferred from electronic annotation                                                                                                                                                                                                 | 3.94E-05 | 2.22        | Up         |
| methylenetetrahydrofolate dehydrogenase (NADP+ dependent) 2-like                          | <i>MTHFD2L</i> | <a href="#">536269</a> | 0008152 // metabolic process // inferred from electronic annotation /// 0009396 // folic acid and derivative biosynthetic process // inferred from electronic annotation                                                                                        | 2.21E-06 | 2.23        | Up         |
| RanBP-type and C3HC4-type zinc finger containing 1                                        | <i>RBCK1</i>   | <a href="#">504400</a> | 0006464 // protein modification process // inferred from electronic                                                                                                                                                                                             | 3.22E-10 | 2.24        | Up         |

| Gene Title                                   | Gene Symbol                 | Entrez Gene            | Putative Function                                                                                                                                                                                                                        | P-value  | Fold Effect | Regulation |
|----------------------------------------------|-----------------------------|------------------------|------------------------------------------------------------------------------------------------------------------------------------------------------------------------------------------------------------------------------------------|----------|-------------|------------|
|                                              |                             |                        | annotation                                                                                                                                                                                                                               |          |             |            |
| claudin 16                                   | <i>CLDN16</i>               | <a href="#">282184</a> | 0006810 // transport // inferred from electronic annotation /// 0006811 // ion transport // inferred from electronic annotation /// 0016338 // calcium-independent cell-cell adhesion // inferred from sequence or structural similarity | 0.000197 | 2.24        | Up         |
| dihydrolipoamide S-acetyltransferase         | <i>DLAT</i>                 | <a href="#">512723</a> | ---                                                                                                                                                                                                                                      | 1.15E-06 | 2.24        | Up         |
| carbonic anhydrase IV                        | <i>CA4</i>                  | <a href="#">280741</a> | 0006730 // one-carbon compound metabolic process // inferred from electronic annotation                                                                                                                                                  | 0.000182 | 2.24        | Up         |
| Similar to interleukin 32                    | <i>LOC50580</i><br><i>0</i> | <a href="#">505800</a> | ---                                                                                                                                                                                                                                      | 8.95E-05 | 2.24        | Up         |
| Boc homolog (mouse)                          | <i>BOC</i>                  | <a href="#">512018</a> | ---                                                                                                                                                                                                                                      | 6.99E-08 | 2.24        | Up         |
| ecotropic viral integration site 2B          | <i>EVI2B</i>                | <a href="#">617442</a> | ---                                                                                                                                                                                                                                      | 6.70E-06 | 2.25        | Up         |
| prolactin regulatory element binding         | <i>PREB</i>                 | <a href="#">525256</a> | ---                                                                                                                                                                                                                                      | 1.70E-09 | 2.26        | Up         |
| ATPase family, AAA domain containing 1       | <i>ATAD1</i>                | <a href="#">506045</a> | ---                                                                                                                                                                                                                                      | 1.51E-16 | 2.26        | Up         |
| 2',3'-cyclic nucleotide 3' phosphodiesterase | <i>CNP</i>                  | <a href="#">280752</a> | 0007409 // axonogenesis // inferred from electronic annotation /// 0008344 // adult locomotory behavior // inferred from electronic annotation /// 0009214 // cyclic nucleotide                                                          | 9.59E-13 | 2.27        | Up         |

| Gene Title                                                  | Gene Symbol         | Entrez Gene            | Putative Function                                                                                                                                                                                                                                               | P-value  | Fold Effect | Regulation |
|-------------------------------------------------------------|---------------------|------------------------|-----------------------------------------------------------------------------------------------------------------------------------------------------------------------------------------------------------------------------------------------------------------|----------|-------------|------------|
|                                                             |                     |                        | catabolic process // inferred from electronic annotation /// 0016070 // RNA met                                                                                                                                                                                 |          |             |            |
| SAR1 gene homolog A ( <i>S. cerevisiae</i> )                | <i>SARIA</i>        | <a href="#">517171</a> | 0006810 // transport // inferred from electronic annotation /// 0006886 // intracellular protein transport // inferred from electronic annotation /// 0007264 // small GTPase mediated signal transduction // inferred from electronic annotation /// 0015031 / | 9.63E-08 | 2.29        | Up         |
| interleukin 18 binding protein                              | <i>IL18BP</i>       | <a href="#">617470</a> | ---                                                                                                                                                                                                                                                             | 2.13E-06 | 2.29        | Up         |
| chromosome 10 open reading frame 10 ortholog                | <i>C28H10OR F10</i> | <a href="#">613715</a> | ---                                                                                                                                                                                                                                                             | 4.25E-05 | 2.30        | Up         |
| small G protein signaling modulator 3                       | <i>SGSM3</i>        | <a href="#">767820</a> | 0007049 // cell cycle // inferred from electronic annotation /// 0007050 // cell cycle arrest // inferred from electronic annotation /// 0032313 // regulation of Rab GTPase activity // inferred from electronic annotation /// 0032483 // regulation of Rab p | 9.62E-07 | 2.30        | Up         |
| similar to WD repeat domain, phosphoinositide interacting 1 | <i>MGC15996 4</i>   | <a href="#">528410</a> | ---                                                                                                                                                                                                                                                             | 0.000246 | 2.30        | Up         |
| hypothetical LOC539087                                      | <i>MGC13441 9</i>   | <a href="#">539087</a> | ---                                                                                                                                                                                                                                                             | 1.14E-08 | 2.30        | Up         |
| protease, serine, 8                                         | <i>PRSS8</i>        | <a href="#">613506</a> | 0006508 // proteolysis // inferred from                                                                                                                                                                                                                         | 4.47E-07 | 2.30        | Up         |

| Gene Title                                                          | Gene Symbol    | Entrez Gene            | Putative Function                                                                                                                                                                                                                                               | P-value  | Fold Effect | Regulation |
|---------------------------------------------------------------------|----------------|------------------------|-----------------------------------------------------------------------------------------------------------------------------------------------------------------------------------------------------------------------------------------------------------------|----------|-------------|------------|
|                                                                     |                |                        | electronic annotation                                                                                                                                                                                                                                           |          |             |            |
| serine/threonine kinase 38 like                                     | <i>STK38L</i>  | <a href="#">514787</a> | 0006468 // protein amino acid phosphorylation // inferred from electronic annotation                                                                                                                                                                            | 1.59E-11 | 2.30        | Up         |
| Mov10, Moloney leukemia virus 10, homolog (mouse)                   | <i>MOV10</i>   | <a href="#">523206</a> | ---                                                                                                                                                                                                                                                             | 5.53E-12 | 2.31        | Up         |
| solute carrier family 2 (facilitated glucose transporter), member 1 | <i>SLC2A1</i>  | <a href="#">282356</a> | 0006810 // transport // inferred from electronic annotation /// 0008643 // carbohydrate transport // inferred from electronic annotation /// 0015758 // glucose transport // inferred from sequence or structural similarity /// 0046323 // glucose import // t | 2.26E-10 | 2.31        | Up         |
| dipeptidyl-peptidase 3                                              | <i>DPP3</i>    | <a href="#">510200</a> | 0006508 // proteolysis // inferred from electronic annotation                                                                                                                                                                                                   | 8.57E-11 | 2.31        | Up         |
| tumor necrosis factor, alpha-induced protein 6                      | <i>TNFAIP6</i> | <a href="#">493710</a> | 0007155 // cell adhesion // inferred from electronic annotation                                                                                                                                                                                                 | 3.05E-10 | 2.32        | Up         |
| phospholipase A1 member A                                           | <i>PLA1A</i>   | <a href="#">515900</a> | 0006629 // lipid metabolic process // inferred from electronic annotation /// 0016042 // lipid catabolic process // inferred from electronic annotation                                                                                                         | 4.18E-06 | 2.33        | Up         |
| RAS and EF-hand domain containing                                   | <i>RASEF</i>   | <a href="#">513223</a> | 0007264 // small GTPase mediated signal transduction // inferred from electronic annotation /// 0015031 // protein transport // inferred from                                                                                                                   | 8.47E-05 | 2.33        | Up         |

| Gene Title                                                 | Gene Symbol      | Entrez Gene            | Putative Function                                                                                                                                                                                                                                               | P-value  | Fold Effect | Regulation |
|------------------------------------------------------------|------------------|------------------------|-----------------------------------------------------------------------------------------------------------------------------------------------------------------------------------------------------------------------------------------------------------------|----------|-------------|------------|
|                                                            |                  |                        | electronic annotation                                                                                                                                                                                                                                           |          |             |            |
| membrane-spanning 4-domains, subfamily A, member 8B        | <i>MS4A8B</i>    | <a href="#">415111</a> | 0007165 // signal transduction // inferred from electronic annotation                                                                                                                                                                                           | 1.35E-10 | 2.33        | Up         |
| claudin 4                                                  | <i>CLDN4</i>     | <a href="#">414921</a> | 0016338 // calcium-independent cell-cell adhesion // inferred from sequence or structural similarity                                                                                                                                                            | 1.72E-07 | 2.33        | Up         |
| hypothetical protein LOC522909                             | <i>LOC522909</i> | <a href="#">522909</a> | ---                                                                                                                                                                                                                                                             | 1.52E-06 | 2.33        | Up         |
| CDKN2A interacting protein                                 | <i>CDKN2AIP</i>  | <a href="#">513265</a> | ---                                                                                                                                                                                                                                                             | 2.37E-11 | 2.34        | Up         |
| interferon regulatory factor 3                             | <i>IRF3</i>      | <a href="#">516979</a> | 0006350 // transcription // inferred from electronic annotation /// 0006355 // regulation of transcription, DNA-dependent // inferred from electronic annotation /// 0009615 // response to virus // inferred from electronic annotation /// 0031663 // lipopol | 3.64E-11 | 2.34        | Up         |
| selenoprotein T                                            | <i>SELT</i>      | <a href="#">783831</a> | 0045454 // cell redox homeostasis // inferred from electronic annotation                                                                                                                                                                                        | 3.46E-08 | 2.34        | Up         |
| cysteine rich transmembrane BMP regulator 1 (chordin-like) | <i>CRIM1</i>     | <a href="#">506264</a> | 0001558 // regulation of cell growth // inferred from electronic annotation /// 0007155 // cell adhesion // inferred from electronic annotation /// 0007339 // binding of sperm to zona pellucida // inferred from electronic                                   | 2.62E-05 | 2.35        | Up         |

| Gene Title                                  | Gene Symbol          | Entrez Gene            | Putative Function                                                                                                             | P-value  | Fold Effect | Regulation |
|---------------------------------------------|----------------------|------------------------|-------------------------------------------------------------------------------------------------------------------------------|----------|-------------|------------|
|                                             |                      |                        | annotation                                                                                                                    |          |             |            |
| MORC family CW-type zinc finger 3           | <i>MORC3</i>         | <a href="#">513807</a> | ---                                                                                                                           | 2.21E-12 | 2.35        | Up         |
| tubulointerstitial nephritis antigen-like 1 | <i>TINAGLI</i>       | <a href="#">509642</a> | 0006508 // proteolysis // inferred from electronic annotation /// 0006810 // transport // inferred from electronic annotation | 1.82E-05 | 2.36        | Up         |
| hypothetical LOC539299                      | <i>LOC539299</i>     | <a href="#">539299</a> | ---                                                                                                                           | 3.41E-12 | 2.36        | Up         |
| similar to HEPH                             | <i>LOC510736</i>     | <a href="#">510736</a> | ---                                                                                                                           | 2.31E-07 | 2.36        | Up         |
| DKFZP564O0823 protein                       | <i>DKFZP56400823</i> | <a href="#">518368</a> | ---                                                                                                                           | 0.007523 | 2.36        | Up         |
| carnitine acetyltransferase                 | <i>CRAT</i>          | <a href="#">512902</a> | ---                                                                                                                           | 1.01E-08 | 2.36        | Up         |
| allograft inflammatory factor 1             | <i>AIF1</i>          | <a href="#">280989</a> | 0051017 // actin filament bundle formation // inferred from electronic annotation                                             | 5.05E-09 | 2.36        | Up         |
| syndecan 2                                  | <i>SDC2</i>          | <a href="#">615785</a> | ---                                                                                                                           | 2.68E-05 | 2.37        | Up         |
| ring finger protein 19B                     | <i>RNF19B</i>        | <a href="#">509774</a> | ---                                                                                                                           | 1.51E-09 | 2.37        | Up         |
| mitochondrial tumor suppressor 1            | <i>MTUS1</i>         | <a href="#">515016</a> | 0007049 // cell cycle // inferred from electronic annotation                                                                  | 1.76E-05 | 2.37        | Up         |
| similar to FLJ11171 protein                 | <i>LOC78191</i>      | <a href="#">781914</a> | ---                                                                                                                           | 6.49E-07 | 2.38        | Up         |

| Gene Title                                         | Gene Symbol      | Entrez Gene            | Putative Function                                                                                                                                                                                                                                              | P-value  | Fold Effect | Regulation |
|----------------------------------------------------|------------------|------------------------|----------------------------------------------------------------------------------------------------------------------------------------------------------------------------------------------------------------------------------------------------------------|----------|-------------|------------|
|                                                    | 4                |                        |                                                                                                                                                                                                                                                                |          |             |            |
| HIG1 domain family, member 1A                      | <i>HIGD1A</i>    | <a href="#">768057</a> | ---                                                                                                                                                                                                                                                            | 3.21E-10 | 2.38        | Up         |
| similar to C-type lectin domain family 2, member h | <i>LOC504309</i> | <a href="#">504309</a> | ---                                                                                                                                                                                                                                                            | 2.14E-12 | 2.38        | Up         |
| annexin A1                                         | <i>ANXA1</i>     | <a href="#">327662</a> | 0007049 // cell cycle // inferred from electronic annotation /// 0007165 // signal transduction // inferred from electronic annotation /// 0018149 // peptide cross-linking // inferred from electronic annotation /// 0030216 // keratinocyte differentiation | 3.97E-15 | 2.38        | Up         |
| nuclear protein 1                                  | <i>NUPR1</i>     | <a href="#">614673</a> | ---                                                                                                                                                                                                                                                            | 6.89E-07 | 2.39        | Up         |
| similar to Signal peptide peptidase-like 2A        | <i>LOC530325</i> | <a href="#">530325</a> | ---                                                                                                                                                                                                                                                            | 8.19E-12 | 2.39        | Up         |
| hypothetical LOC508353                             | <i>LOC508353</i> | <a href="#">508353</a> | ---                                                                                                                                                                                                                                                            | 5.69E-05 | 2.40        | Up         |
| Mucin 13, cell surface associated                  | <i>MUC13</i>     | <a href="#">511430</a> | ---                                                                                                                                                                                                                                                            | 7.32E-08 | 2.41        | Up         |
| complement component 1, q subcomponent, A chain    | <i>CIQA</i>      | <a href="#">534961</a> | 0006817 // phosphate transport // inferred from electronic annotation /// 0006955 // immune response // inferred from electronic annotation /// 0006958 // complement activation, classical pathway // inferred from electronic annotation /// 0045087 //      | 7.57E-08 | 2.41        | Up         |



| Gene Title                                                                         | Gene Symbol                              | Entrez Gene             | Putative Function                                                                                                                                                                                                                                                    | P-value  | Fold Effect | Regulation |
|------------------------------------------------------------------------------------|------------------------------------------|-------------------------|----------------------------------------------------------------------------------------------------------------------------------------------------------------------------------------------------------------------------------------------------------------------|----------|-------------|------------|
|                                                                                    |                                          |                         | innat                                                                                                                                                                                                                                                                |          |             |            |
| BCL2-like 1                                                                        | <i>BCL2L1</i>                            | <a href="#">282152</a>  | 0006915 // apoptosis // inferred from electronic annotation /// 0042981 // regulation of apoptosis // inferred from electronic annotation                                                                                                                            | 4.80E-07 | 2.41        | Up         |
| tyrosyl-tRNA synthetase                                                            | <i>YARS</i>                              | <a href="#">281581</a>  | 0006412 // translation // inferred from electronic annotation /// 0006418 // tRNA aminoacylation for protein translation // inferred from electronic annotation /// 0006437 // tyrosyl-tRNA aminoacylation // inferred from electronic annotation                    | 1.08E-06 | 2.41        | Up         |
| general transcription factor IIB /// similar to general transcription factor TfiIB | <i>GTF2B</i> ///<br><i>LOC78665</i><br>6 | 513231<br>///<br>786656 | 0006350 // transcription // inferred from electronic annotation ///<br>0006352 // transcription initiation // inferred from electronic annotation ///<br>0006355 // regulation of transcription, DNA-dependent // inferred from electronic annotation /// 0006413 // | 5.98E-12 | 2.42        | Up         |
| macrophage scavenger receptor 1                                                    | <i>MSR1</i>                              | <a href="#">281311</a>  | 0006817 // phosphate transport // inferred from electronic annotation ///<br>0006897 // endocytosis // inferred from electronic annotation ///<br>0006898 // receptor-mediated endocytosis // inferred from electronic annotation                                    | 4.56E-07 | 2.42        | Up         |
| similar to C-type lectin domain family 2,                                          | <i>LOC50430</i>                          | <a href="#">504309</a>  | ---                                                                                                                                                                                                                                                                  | 8.26E-13 | 2.42        | Up         |

| Gene Title                                                                                    | Gene Symbol    | Entrez Gene            | Putative Function                                                                                                                                                                                                                                               | P-value  | Fold Effect | Regulation |
|-----------------------------------------------------------------------------------------------|----------------|------------------------|-----------------------------------------------------------------------------------------------------------------------------------------------------------------------------------------------------------------------------------------------------------------|----------|-------------|------------|
| member h                                                                                      | 9              |                        |                                                                                                                                                                                                                                                                 |          |             |            |
| 2,4-dienoyl CoA reductase 2, peroxisomal                                                      | <i>DECR2</i>   | <a href="#">768256</a> | 0008152 // metabolic process // inferred from electronic annotation /// 0009239 // enterobactin biosynthetic process // inferred from electronic annotation                                                                                                     | 6.97E-08 | 2.42        | Up         |
| solute carrier family 27 (fatty acid transporter), member 5                                   | <i>SLC27A5</i> | <a href="#">533016</a> | 0008152 // metabolic process // inferred from electronic annotation                                                                                                                                                                                             | 2.64E-07 | 2.43        | Up         |
| death-associated protein 6                                                                    | <i>DAXX</i>    | <a href="#">504336</a> | ---                                                                                                                                                                                                                                                             | 1.11E-10 | 2.44        | Up         |
| transmembrane 4 L six family member 1                                                         | <i>TM4SF1</i>  | <a href="#">533038</a> | ---                                                                                                                                                                                                                                                             | 3.91E-09 | 2.44        | Up         |
| Fc fragment of IgE, high affinity I, receptor for; gamma polypeptide                          | <i>FCER1G</i>  | <a href="#">282226</a> | 0001798 // positive regulation of type IIa hypersensitivity // inferred from electronic annotation /// 0001805 // positive regulation of type III hypersensitivity // inferred from electronic annotation /// 0001812 // positive regulation of type I hypersen | 1.64E-10 | 2.46        | Up         |
| glutamate receptor, ionotropic, N-methyl D-aspartate-associated protein 1 (glutamate binding) | <i>GRINA</i>   | <a href="#">510225</a> | ---                                                                                                                                                                                                                                                             | 2.28E-10 | 2.46        | Up         |
| acyl-CoA synthetase short-chain family member 2                                               | <i>ACSS2</i>   | <a href="#">506459</a> | 0008152 // metabolic process // inferred from electronic annotation                                                                                                                                                                                             | 5.90E-07 | 2.46        | Up         |
| ubiquitin specific peptidase 25                                                               | <i>USP25</i>   | <a href="#">524531</a> | 0006511 // ubiquitin-dependent protein catabolic process // inferred                                                                                                                                                                                            | 1.89E-11 | 2.46        | Up         |

| Gene Title                                                                              | Gene Symbol      | Entrez Gene            | Putative Function                                                                                                                                               | P-value  | Fold Effect | Regulation |
|-----------------------------------------------------------------------------------------|------------------|------------------------|-----------------------------------------------------------------------------------------------------------------------------------------------------------------|----------|-------------|------------|
|                                                                                         |                  |                        | from electronic annotation                                                                                                                                      |          |             |            |
| PAP associated domain containing 4                                                      | <i>PAPD4</i>     | <a href="#">533862</a> | ---                                                                                                                                                             | 1.12E-11 | 2.47        | Up         |
| interleukin 20 receptor beta                                                            | <i>IL20RB</i>    | <a href="#">534581</a> | ---                                                                                                                                                             | 0.001878 | 2.48        | Up         |
| lysophospholipase I                                                                     | <i>LYPLA1</i>    | <a href="#">539992</a> | 0006629 // lipid metabolic process // inferred from electronic annotation ///<br>0006631 // fatty acid metabolic process // inferred from electronic annotation | 1.66E-05 | 2.49        | Up         |
| transmembrane protein 106A                                                              | <i>TMEM106A</i>  | <a href="#">508269</a> | ---                                                                                                                                                             | 2.15E-09 | 2.49        | Up         |
| Intercellular adhesion molecule 2                                                       | <i>ICAM2</i>     | <a href="#">506088</a> | 0016337 // cell-cell adhesion // inferred from electronic annotation                                                                                            | 3.76E-05 | 2.49        | Up         |
| sterol O-acyltransferase (acyl-Coenzyme A: cholesterol acyltransferase) 1               | <i>SOAT1</i>     | <a href="#">504287</a> | ---                                                                                                                                                             | 6.40E-07 | 2.50        | Up         |
| Similar to Probable phospholipid-transporting ATPase VA (P-locus fat-associated ATPase) | <i>LOC510723</i> | <a href="#">510723</a> | ---                                                                                                                                                             | 2.37E-07 | 2.50        | Up         |
| Fc fragment of IgG, low affinity IIIa, receptor (CD16a)                                 | <i>FCGR3A</i>    | <a href="#">281766</a> | ---                                                                                                                                                             | 4.17E-10 | 2.50        | Up         |
| phospholipase D1, phosphatidylcholine-specific                                          | <i>PLD1</i>      | <a href="#">514554</a> | 0007154 // cell communication // inferred from electronic annotation ///<br>0008152 // metabolic process // inferred from electronic annotation                 | 4.32E-07 | 2.51        | Up         |

| Gene Title                                                                | Gene Symbol      | Entrez Gene            | Putative Function                                                                                                                                                                                                    | P-value  | Fold Effect | Regulation |
|---------------------------------------------------------------------------|------------------|------------------------|----------------------------------------------------------------------------------------------------------------------------------------------------------------------------------------------------------------------|----------|-------------|------------|
| survival motor neuron                                                     | <i>SMN</i>       | <a href="#">281492</a> | 0000245 // spliceosome assembly // inferred from electronic annotation ///<br>0006397 // mRNA processing // inferred from electronic annotation                                                                      | 4.29E-08 | 2.51        | Up         |
| RNA binding motif protein 43                                              | <i>RBM43</i>     | <a href="#">617625</a> | ---                                                                                                                                                                                                                  | 5.77E-10 | 2.51        | Up         |
| Nuclear factor of activated T-cells, cytoplasmic, calcineurin-dependent 1 | <i>NFATC1</i>    | <a href="#">511224</a> | 0006355 // regulation of transcription, DNA-dependent // inferred from electronic annotation                                                                                                                         | 3.24E-07 | 2.52        | Up         |
| WD repeat domain 16                                                       | <i>WDR16</i>     | <a href="#">505885</a> | ---                                                                                                                                                                                                                  | 0.000231 | 2.52        | Up         |
| selectin L (lymphocyte adhesion molecule 1)                               | <i>SELL</i>      | <a href="#">281485</a> | 0007155 // cell adhesion // inferred from electronic annotation ///<br>0007155 // cell adhesion // non-traceable author statement                                                                                    | 1.04E-09 | 2.53        | Up         |
| MAD2 mitotic arrest deficient-like 2 (yeast)                              | <i>MAD2L2</i>    | <a href="#">506605</a> | 0007067 // mitosis // inferred from electronic annotation                                                                                                                                                            | 8.49E-14 | 2.55        | Up         |
| Transmembrane protein 127                                                 | <i>TMEM127</i>   | <a href="#">513620</a> | ---                                                                                                                                                                                                                  | 0.000548 | 2.56        | Up         |
| CD53 molecule                                                             | <i>CD53</i>      | <a href="#">505040</a> | ---                                                                                                                                                                                                                  | 5.13E-09 | 2.58        | Up         |
| regakine 1                                                                | <i>LOC504773</i> | <a href="#">504773</a> | 0006935 // chemotaxis // inferred from electronic annotation ///<br>0006954 // inflammatory response // inferred from electronic annotation ///<br>0006955 // immune response // inferred from electronic annotation | 1.15E-06 | 2.58        | Up         |

| Gene Title                                                                                  | Gene Symbol      | Entrez Gene            | Putative Function                                                                                                                                                                                                                                            | P-value  | Fold Effect | Regulation |
|---------------------------------------------------------------------------------------------|------------------|------------------------|--------------------------------------------------------------------------------------------------------------------------------------------------------------------------------------------------------------------------------------------------------------|----------|-------------|------------|
| optineurin                                                                                  | <i>OPTN</i>      | <a href="#">534150</a> | ---                                                                                                                                                                                                                                                          | 3.34E-13 | 2.58        | Up         |
| stefin C                                                                                    | <i>LOC514170</i> | <a href="#">514170</a> | ---                                                                                                                                                                                                                                                          | 0.002248 | 2.60        | Up         |
| solute carrier family 25 (mitochondrial carrier; adenine nucleotide translocator), member 5 | <i>SLC25A5</i>   | <a href="#">282479</a> | 0006810 // transport // inferred from electronic annotation                                                                                                                                                                                                  | 6.14E-09 | 2.60        | Up         |
| peroxidasin homolog (Drosophila)                                                            | <i>PXDN</i>      | <a href="#">515860</a> | 0006979 // response to oxidative stress // inferred from electronic annotation                                                                                                                                                                               | 2.56E-06 | 2.60        | Up         |
| agrin                                                                                       | <i>AGRN</i>      | <a href="#">525795</a> | 0007213 // acetylcholine receptor signaling, muscarinic pathway // inferred from electronic annotation ///<br>0008033 // tRNA processing // inferred from electronic annotation ///<br>0043113 // receptor clustering // inferred from electronic annotation | 2.35E-13 | 2.61        | Up         |
| similar to Chromosome 9 open reading frame 61                                               | <i>LOC509420</i> | <a href="#">509420</a> | ---                                                                                                                                                                                                                                                          | 1.14E-07 | 2.61        | Up         |
| nucleoporin 93kDa                                                                           | <i>NUP93</i>     | <a href="#">510004</a> | 0006810 // transport // inferred from electronic annotation                                                                                                                                                                                                  | 3.41E-07 | 2.61        | Up         |
| similar to ubiquitin specific proteinase 43                                                 | <i>LOC506996</i> | <a href="#">506996</a> | ---                                                                                                                                                                                                                                                          | 2.10E-05 | 2.62        | Up         |
| interferon regulatory factor 1                                                              | <i>IRF1</i>      | <a href="#">337917</a> | 0006350 // transcription // inferred from electronic annotation ///                                                                                                                                                                                          | 1.75E-06 | 2.62        | Up         |

| Gene Title                                        | Gene Symbol   | Entrez Gene            | Putative Function                                                                                                                                                                                                                                   | P-value  | Fold Effect | Regulation |
|---------------------------------------------------|---------------|------------------------|-----------------------------------------------------------------------------------------------------------------------------------------------------------------------------------------------------------------------------------------------------|----------|-------------|------------|
|                                                   |               |                        | 0006355 // regulation of transcription, DNA-dependent // inferred from electronic annotation /// 0007049 // cell cycle // inferred from electronic annotation /// 0045786 // negative regul                                                         |          |             |            |
| F-box protein 33                                  | <i>FBXO33</i> | <a href="#">539998</a> | ---                                                                                                                                                                                                                                                 | 2.20E-11 | 2.63        | Up         |
| optineurin                                        | <i>OPTN</i>   | <a href="#">534150</a> | ---                                                                                                                                                                                                                                                 | 6.18E-09 | 2.64        | Up         |
| F-box protein 33                                  | <i>FBXO33</i> | <a href="#">539998</a> | ---                                                                                                                                                                                                                                                 | 1.48E-12 | 2.64        | Up         |
| crystallin, mu                                    | <i>CRYM</i>   | <a href="#">505167</a> | 0008152 // metabolic process // inferred from electronic annotation                                                                                                                                                                                 | 0.000118 | 2.64        | Up         |
| methionyl-tRNA synthetase 2, mitochondrial        | <i>MARS2</i>  | <a href="#">514726</a> | 0006412 // translation // inferred from electronic annotation /// 0006418 // tRNA aminoacylation for protein translation // inferred from electronic annotation /// 0006431 // methionyl-tRNA aminoacylation // inferred from electronic annotation | 1.24E-07 | 2.65        | Up         |
| transmembrane 4 L six family member 1             | <i>TM4SF1</i> | <a href="#">533038</a> | ---                                                                                                                                                                                                                                                 | 7.42E-13 | 2.66        | Up         |
| Intercellular adhesion molecule 2                 | <i>ICAM2</i>  | <a href="#">506088</a> | 0016337 // cell-cell adhesion // inferred from electronic annotation                                                                                                                                                                                | 2.06E-05 | 2.66        | Up         |
| interferon induced transmembrane protein 1 (9-27) | <i>IFITM1</i> | <a href="#">353510</a> | 0009607 // response to biotic stimulus // inferred from electronic annotation                                                                                                                                                                       | 6.83E-12 | 2.66        | Up         |

| Gene Title                                              | Gene Symbol      | Entrez Gene            | Putative Function                                                                                                                                                   | P-value  | Fold Effect | Regulation |
|---------------------------------------------------------|------------------|------------------------|---------------------------------------------------------------------------------------------------------------------------------------------------------------------|----------|-------------|------------|
| creatine kinase, mitochondrial 1 (ubiquitous)           | <i>CKMT1</i>     | <a href="#">281692</a> | ---                                                                                                                                                                 | 1.03E-06 | 2.68        | Up         |
| interleukin 1 receptor antagonist                       | <i>IL1RN</i>     | <a href="#">281860</a> | 0006955 // immune response // inferred from electronic annotation                                                                                                   | 2.84E-09 | 2.70        | Up         |
| Hypothetical protein LOC509620                          | <i>LOC509620</i> | <a href="#">509620</a> | ---                                                                                                                                                                 | 1.55E-10 | 2.71        | Up         |
| interferon regulatory factor 5                          | <i>IRF5</i>      | <a href="#">615340</a> | 0006350 // transcription // inferred from electronic annotation ///<br>0006355 // regulation of transcription, DNA-dependent // inferred from electronic annotation | 3.26E-07 | 2.71        | Up         |
| optineurin                                              | <i>OPTN</i>      | <a href="#">534150</a> | ---                                                                                                                                                                 | 1.06E-07 | 2.71        | Up         |
| survival motor neuron                                   | <i>SMN</i>       | <a href="#">281492</a> | 0000245 // spliceosome assembly // inferred from electronic annotation ///<br>0006397 // mRNA processing // inferred from electronic annotation                     | 3.20E-08 | 2.72        | Up         |
| ectonucleotide pyrophosphatase/phosphodiesterase 3      | <i>ENPP3</i>     | <a href="#">529405</a> | 0008152 // metabolic process // inferred from electronic annotation                                                                                                 | 0.000464 | 2.72        | Up         |
| MAD2 mitotic arrest deficient-like 2 (yeast)            | <i>MAD2L2</i>    | <a href="#">506605</a> | 0007067 // mitosis // inferred from electronic annotation                                                                                                           | 3.71E-12 | 2.72        | Up         |
| lectin, galactoside-binding, soluble, 3 binding protein | <i>LGALS3BP</i>  | <a href="#">531137</a> | ---                                                                                                                                                                 | 9.05E-13 | 2.73        | Up         |
| glutathione S-transferase M4                            | <i>GSTM4</i>     | <a href="#">783879</a> | 0008152 // metabolic process //                                                                                                                                     | 7.04E-06 | 2.74        | Up         |

| Gene Title                                                                         | Gene Symbol     | Entrez Gene            | Putative Function                                                                                                                                                                                                                                              | P-value  | Fold Effect | Regulation |
|------------------------------------------------------------------------------------|-----------------|------------------------|----------------------------------------------------------------------------------------------------------------------------------------------------------------------------------------------------------------------------------------------------------------|----------|-------------|------------|
|                                                                                    |                 |                        | inferred from electronic annotation                                                                                                                                                                                                                            |          |             |            |
| serpin peptidase inhibitor, clade A (alpha-1 antitrypsin, antitrypsin), member 1   | <i>SERPINA1</i> | 280699                 | 0009405 // pathogenesis // inferred from electronic annotation                                                                                                                                                                                                 | 0.000933 | 2.74        | Up         |
| serpin peptidase inhibitor, clade A (alpha-1 antitrypsin, antitrypsin), member 11  | <i>SERPINA1</i> | 538280                 |                                                                                                                                                                                                                                                                |          |             |            |
| argininosuccinate lyase                                                            | <i>ASL</i>      | <a href="#">512771</a> | 0000050 // urea cycle // inferred from electronic annotation /// 0006526 // arginine biosynthetic process // inferred from electronic annotation /// 0008652 // amino acid biosynthetic process // inferred from electronic annotation /// 0042450 // arginine | 6.73E-07 | 2.80        | Up         |
| solute carrier family 25 (mitochondrial thiamine pyrophosphate carrier), member 19 | <i>SLC25A19</i> | <a href="#">504418</a> | 0006810 // transport // inferred from electronic annotation                                                                                                                                                                                                    | 4.43E-10 | 2.80        | Up         |
| tripartite motif-containing 25                                                     | <i>TRIM25</i>   | <a href="#">510923</a> | ---                                                                                                                                                                                                                                                            | 4.94E-10 | 2.81        | Up         |
| solute carrier family 27 (fatty acid transporter), member 2                        | <i>SLC27A2</i>  | <a href="#">535727</a> | 0008152 // metabolic process // inferred from electronic annotation                                                                                                                                                                                            | 1.29E-06 | 2.82        | Up         |
| tripartite motif-containing 21                                                     | <i>TRIM21</i>   | <a href="#">359715</a> | 0016567 // protein ubiquitination // inferred from electronic annotation                                                                                                                                                                                       | 1.53E-10 | 2.82        | Up         |
| CASP8 and FADD-like apoptosis regulator                                            | <i>CFLAR</i>    | <a href="#">497199</a> | 0006508 // proteolysis // inferred from electronic annotation /// 0006915 // apoptosis // inferred from electronic annotation /// 0042981 // regulation of apoptosis // inferred from electronic                                                               | 0.000262 | 2.82        | Up         |



| Gene Title                                                                | Gene Symbol                                  | Entrez Gene             | Putative Function                                                                                                                                                                                                                                              | P-value  | Fold Effect | Regulation |
|---------------------------------------------------------------------------|----------------------------------------------|-------------------------|----------------------------------------------------------------------------------------------------------------------------------------------------------------------------------------------------------------------------------------------------------------|----------|-------------|------------|
|                                                                           |                                              |                         | annotation                                                                                                                                                                                                                                                     |          |             |            |
| oxidative stress induced growth inhibitor 1                               | <i>OSGIN1</i>                                | <a href="#">768073</a>  | ---                                                                                                                                                                                                                                                            | 8.82E-06 | 2.83        | Up         |
| myelin protein zero-like 1                                                | <i>MPZL1</i>                                 | <a href="#">539387</a>  | ---                                                                                                                                                                                                                                                            | 1.31E-07 | 2.83        | Up         |
| sphingomyelin phosphodiesterase, acid-like 3B                             | <i>SMPDL3B</i>                               | <a href="#">518699</a>  | ---                                                                                                                                                                                                                                                            | 8.05E-07 | 2.83        | Up         |
| tachykinin receptor 3                                                     | <i>TACR3</i>                                 | <a href="#">404136</a>  | 0007165 // signal transduction // inferred from electronic annotation /// 0007186 // G-protein coupled receptor protein signaling pathway // inferred from electronic annotation                                                                               | 0.000149 | 2.84        | Up         |
| signal transducer and activator of transcription 1, 91kDa                 | <i>STAT1</i>                                 | <a href="#">510814</a>  | 0006355 // regulation of transcription, DNA-dependent // inferred from electronic annotation /// 0007165 // signal transduction // inferred from electronic annotation /// 0045449 // regulation of transcription // inferred from electronic annotation       | 5.29E-14 | 2.84        | Up         |
| similar to glutathione peroxidase 2 /// RAB15, member RAS oncogene family | <i>LOC53308</i><br><i>8</i> /// <i>RAB15</i> | 533088<br>///<br>614507 | 0006810 // transport // inferred from electronic annotation /// 0006886 // intracellular protein transport // inferred from electronic annotation /// 0006913 // nucleocytoplasmic transport // inferred from electronic annotation /// 0006979 // response to | 3.15E-05 | 2.87        | Up         |

| Gene Title                                                       | Gene Symbol    | Entrez Gene             | Putative Function                                                                                                                                                                                                                                               | P-value  | Fold Effect | Regulation |
|------------------------------------------------------------------|----------------|-------------------------|-----------------------------------------------------------------------------------------------------------------------------------------------------------------------------------------------------------------------------------------------------------------|----------|-------------|------------|
| transmembrane protein 156                                        | <i>TMEM156</i> | <a href="#">533681</a>  | ---                                                                                                                                                                                                                                                             | 2.19E-06 | 2.89        | Up         |
| ganglioside induced differentiation associated protein 2         | <i>GDAP2</i>   | <a href="#">508774</a>  | ---                                                                                                                                                                                                                                                             | 1.42E-12 | 2.90        | Up         |
| serine palmitoyltransferase, long chain base subunit 2           | <i>SPTLC2</i>  | <a href="#">537972</a>  | 0009058 // biosynthetic process // inferred from electronic annotation                                                                                                                                                                                          | 1.32E-10 | 2.90        | Up         |
| N-myc (and STAT) interactor                                      | <i>NMI</i>     | 511280<br>///<br>784981 | ---                                                                                                                                                                                                                                                             | 2.29E-13 | 2.91        | Up         |
| RCD1 required for cell differentiation1 homolog (S. pombe)       | <i>RQCD1</i>   | <a href="#">536537</a>  | 0006350 // transcription // inferred from electronic annotation ///<br>0006355 // regulation of transcription, DNA-dependent // inferred from electronic annotation                                                                                             | 1.65E-08 | 2.92        | Up         |
| solute carrier family 5 (sodium/glucose cotransporter), member 1 | <i>SLC5A1</i>  | <a href="#">282361</a>  | 0006810 // transport // inferred from electronic annotation /// 0006811 // ion transport // inferred from electronic annotation /// 0006814 // sodium ion transport // inferred from electronic annotation /// 0006970 // response to osmotic stress // inferre | 3.64E-05 | 2.92        | Up         |
| Actin binding LIM protein family, member 3                       | <i>ABLIM3</i>  | <a href="#">613794</a>  | 0007010 // cytoskeleton organization and biogenesis // inferred from electronic annotation                                                                                                                                                                      | 3.51E-07 | 2.93        | Up         |
| complement factor B                                              | <i>CFB</i>     | <a href="#">514076</a>  | 0006508 // proteolysis // inferred from electronic annotation /// 0006955 //                                                                                                                                                                                    | 7.71E-06 | 2.94        | Up         |

| Gene Title                                                                        | Gene Symbol      | Entrez Gene            | Putative Function                                                                                                                                                                                                                                      | P-value  | Fold Effect | Regulation |
|-----------------------------------------------------------------------------------|------------------|------------------------|--------------------------------------------------------------------------------------------------------------------------------------------------------------------------------------------------------------------------------------------------------|----------|-------------|------------|
|                                                                                   |                  |                        | immune response // inferred from electronic annotation /// 0006956 // complement activation // inferred from electronic annotation /// 0006957 // complement activation, alternati                                                                     |          |             |            |
| neural precursor cell expressed, developmentally down-regulated 4-like            | <i>NEDD4L</i>    | <a href="#">510003</a> | 0006464 // protein modification process // inferred from electronic annotation /// 0006512 // ubiquitin cycle // inferred from electronic annotation                                                                                                   | 4.67E-12 | 2.95        | Up         |
| similar to aldehyde oxidase 2                                                     | <i>LOC518393</i> | <a href="#">518393</a> | 0006826 // iron ion transport // inferred from electronic annotation /// 0006879 // cellular iron ion homeostasis // inferred from electronic annotation                                                                                               | 0.000348 | 3.00        | Up         |
| SERTA domain containing 1                                                         | <i>SERTAD1</i>   | <a href="#">539321</a> | ---                                                                                                                                                                                                                                                    | 1.01E-11 | 3.01        | Up         |
| neutrophil cytosolic factor 2 (65kDa, chronic granulomatous disease, autosomal 2) | <i>NCF2</i>      | <a href="#">281346</a> | ---                                                                                                                                                                                                                                                    | 2.57E-08 | 3.02        | Up         |
| tryptophanyl-tRNA synthetase                                                      | <i>WARS</i>      | <a href="#">281576</a> | 0006412 // translation // inferred from electronic annotation /// 0006418 // tRNA aminoacylation for protein translation // inferred from electronic annotation /// 0006436 // tryptophanyl-tRNA aminoacylation // inferred from electronic annotation | 7.27E-11 | 3.03        | Up         |

| Gene Title                                                          | Gene Symbol      | Entrez Gene            | Putative Function                                                                                                                                                                                                                                               | P-value  | Fold Effect | Regulation |
|---------------------------------------------------------------------|------------------|------------------------|-----------------------------------------------------------------------------------------------------------------------------------------------------------------------------------------------------------------------------------------------------------------|----------|-------------|------------|
| myelin protein zero-like 1                                          | <i>MPZL1</i>     | <a href="#">539387</a> | ---                                                                                                                                                                                                                                                             | 1.01E-07 | 3.04        | Up         |
| lysozyme 1                                                          | <i>LYZ1</i>      | <a href="#">281287</a> | 0008152 // metabolic process // inferred from electronic annotation /// 0016998 // cell wall catabolic process // inferred from electronic annotation /// 0019835 // cytolysis // inferred from electronic annotation /// 0042742 // defense response to bacter | 0.002306 | 3.04        | Up         |
| myelin protein zero-like 1                                          | <i>MPZL1</i>     | <a href="#">539387</a> | ---                                                                                                                                                                                                                                                             | 2.78E-09 | 3.05        | Up         |
| similar to putative polypeptide N-acetylgalactosaminyltransferase 2 | <i>LOC505622</i> | <a href="#">505622</a> | ---                                                                                                                                                                                                                                                             | 1.65E-05 | 3.06        | Up         |
| basic leucine zipper and W2 domains 2                               | <i>BZW2</i>      | <a href="#">326579</a> | 0006446 // regulation of translational initiation // inferred from electronic annotation                                                                                                                                                                        | 3.35E-08 | 3.06        | Up         |
| hypothetical LOC616344                                              | <i>LOC616344</i> | <a href="#">616344</a> | ---                                                                                                                                                                                                                                                             | 4.19E-09 | 3.06        | Up         |
| CD40 molecule, TNF receptor superfamily member 5                    | <i>CD40</i>      | <a href="#">286849</a> | 0002768 // immune response-regulating cell surface receptor signaling pathway // inferred from electronic annotation /// 0006915 // apoptosis // inferred from electronic annotation /// 0006955 // immune response // inferred from electronic annotation ///  | 4.73E-07 | 3.08        | Up         |
| phosphoenolpyruvate carboxykinase 2                                 | <i>PCK2</i>      | <a href="#">282856</a> | 0006094 // gluconeogenesis //                                                                                                                                                                                                                                   | 1.49E-08 | 3.08        | Up         |

| Gene Title                                                                  | Gene Symbol     | Entrez Gene            | Putative Function                                                                                                                                                                                                                                               | P-value  | Fold Effect | Regulation |
|-----------------------------------------------------------------------------|-----------------|------------------------|-----------------------------------------------------------------------------------------------------------------------------------------------------------------------------------------------------------------------------------------------------------------|----------|-------------|------------|
| (mitochondrial)                                                             |                 |                        | inferred from electronic annotation                                                                                                                                                                                                                             |          |             |            |
| lymphocyte antigen 6 complex, locus E                                       | <i>LY6E</i>     | <a href="#">510977</a> | ---                                                                                                                                                                                                                                                             | 1.02E-12 | 3.09        | Up         |
| solute carrier family 12 (sodium/potassium/chloride transporters), member 2 | <i>SLC12A2</i>  | <a href="#">286845</a> | 0006810 // transport // inferred from electronic annotation /// 0006811 // ion transport // inferred from electronic annotation /// 0006814 // sodium ion transport // inferred from electronic annotation /// 0006821 // chloride transport // inferred from e | 8.53E-07 | 3.09        | Up         |
| histone cluster 1, H1c                                                      | <i>HIST1H1C</i> | <a href="#">513971</a> | 0006334 // nucleosome assembly // inferred from electronic annotation                                                                                                                                                                                           | 1.82E-06 | 3.10        | Up         |
| aminolevulinate, delta-, synthase 1                                         | <i>ALAS1</i>    | <a href="#">534286</a> | 0009058 // biosynthetic process // inferred from electronic annotation /// 0033014 // tetrapyrrole biosynthetic process // inferred from electronic annotation                                                                                                  | 1.01E-10 | 3.12        | Up         |
| EH-domain containing 4                                                      | <i>EHD4</i>     | <a href="#">505206</a> | ---                                                                                                                                                                                                                                                             | 5.58E-10 | 3.12        | Up         |
| ATPase family, AAA domain containing 1                                      | <i>ATAD1</i>    | <a href="#">506045</a> | ---                                                                                                                                                                                                                                                             | 1.54E-07 | 3.12        | Up         |
| ganglioside induced differentiation associated protein 2                    | <i>GDAP2</i>    | <a href="#">508774</a> | ---                                                                                                                                                                                                                                                             | 2.11E-15 | 3.13        | Up         |
| Bcl2-like 14 (apoptosis facilitator)                                        | <i>BCL2L14</i>  | <a href="#">508365</a> | 0006915 // apoptosis // inferred from electronic annotation /// 0042981 // regulation of apoptosis // inferred                                                                                                                                                  | 7.97E-07 | 3.14        | Up         |

| Gene Title                           | Gene Symbol      | Entrez Gene            | Putative Function                                                                    | P-value  | Fold Effect | Regulation |
|--------------------------------------|------------------|------------------------|--------------------------------------------------------------------------------------|----------|-------------|------------|
|                                      |                  |                        | from electronic annotation                                                           |          |             |            |
| synaptogyrin 1                       | <i>SYNGR1</i>    | <a href="#">534995</a> | ---                                                                                  | 6.92E-05 | 3.16        | Up         |
| Protease, serine, 22                 | <i>PRSS22</i>    | <a href="#">510394</a> | 0006508 // proteolysis // inferred from electronic annotation                        | 4.65E-05 | 3.16        | Up         |
| similar to LFA-3                     | <i>LOC782186</i> | <a href="#">782186</a> | ---                                                                                  | 2.25E-06 | 3.17        | Up         |
| serine incorporator 2                | <i>SERINC2</i>   | <a href="#">513593</a> | ---                                                                                  | 4.72E-10 | 3.19        | Up         |
| crystallin, mu                       | <i>CRYM</i>      | <a href="#">505167</a> | 0008152 // metabolic process // inferred from electronic annotation                  | 3.98E-05 | 3.21        | Up         |
| apoptosis-associated tyrosine kinase | <i>AATK</i>      | <a href="#">511515</a> | 0006468 // protein amino acid phosphorylation // inferred from electronic annotation | 1.63E-06 | 3.22        | Up         |
| coiled-coil domain containing 136    | <i>CCDC136</i>   | <a href="#">615922</a> | ---                                                                                  | 1.30E-09 | 3.25        | Up         |
| 5'-nucleotidase, cytosolic III       | <i>NT5C3</i>     | <a href="#">511858</a> | ---                                                                                  | 3.38E-10 | 3.27        | Up         |
| N-myc (and STAT) interactor          | <i>NMI</i>       | <a href="#">511280</a> | ---                                                                                  | 1.71E-13 | 3.29        | Up         |
| Oncostatin M receptor                | <i>OSMR</i>      | <a href="#">514720</a> | ---                                                                                  | 3.27E-07 | 3.29        | Up         |
| hypothetical LOC616344               | <i>LOC616344</i> | <a href="#">616344</a> | ---                                                                                  | 2.97E-11 | 3.30        | Up         |
| Hypothetical LOC514701               | <i>LOC514701</i> | <a href="#">514701</a> | ---                                                                                  | 1.29E-07 | 3.33        | Up         |

| Gene Title                                                                  | Gene Symbol     | Entrez Gene            | Putative Function                                                                                                                                                                                                                                               | P-value  | Fold Effect | Regulation |
|-----------------------------------------------------------------------------|-----------------|------------------------|-----------------------------------------------------------------------------------------------------------------------------------------------------------------------------------------------------------------------------------------------------------------|----------|-------------|------------|
| transporter 1, ATP-binding cassette, sub-family B (MDR/TAP)                 | <i>TAP1</i>     | <a href="#">524959</a> | 0006810 // transport // inferred from electronic annotation                                                                                                                                                                                                     | 2.11E-12 | 3.34        | Up         |
| StAR-related lipid transfer (START) domain containing 5                     | <i>STARD5</i>   | <a href="#">512369</a> | 0006810 // transport // inferred from electronic annotation /// 0006869 // lipid transport // inferred from electronic annotation                                                                                                                               | 4.70E-08 | 3.35        | Up         |
| lectin, galactoside-binding, soluble, 3 binding protein                     | <i>LGALS3BP</i> | <a href="#">531137</a> | ---                                                                                                                                                                                                                                                             | 6.28E-08 | 3.37        | Up         |
| interferon induced transmembrane protein 1 (9-27)                           | <i>IFITM1</i>   | <a href="#">353510</a> | 0009607 // response to biotic stimulus // inferred from electronic annotation                                                                                                                                                                                   | 2.56E-12 | 3.38        | Up         |
| ribonuclease, RNase A family, k6                                            | <i>RNASE6</i>   | <a href="#">282341</a> | ---                                                                                                                                                                                                                                                             | 3.23E-12 | 3.39        | Up         |
| neurochondrin                                                               | <i>NCDN</i>     | <a href="#">505994</a> | ---                                                                                                                                                                                                                                                             | 1.26E-05 | 3.41        | Up         |
| Proteasome (prosome, macropain) inhibitor subunit 1 (PI31)                  | <i>PSMF1</i>    | <a href="#">617807</a> | ---                                                                                                                                                                                                                                                             | 4.07E-17 | 3.41        | Up         |
| solute carrier family 12 (sodium/potassium/chloride transporters), member 2 | <i>SLC12A2</i>  | <a href="#">286845</a> | 0006810 // transport // inferred from electronic annotation /// 0006811 // ion transport // inferred from electronic annotation /// 0006814 // sodium ion transport // inferred from electronic annotation /// 0006821 // chloride transport // inferred from e | 9.58E-09 | 3.42        | Up         |
| ubiquitin-conjugating enzyme E2L 6                                          | <i>UBE2L6</i>   | <a href="#">509471</a> | 0006512 // ubiquitin cycle // inferred from electronic annotation /// 0043687 // post-translational protein                                                                                                                                                     | 7.80E-13 | 3.44        | Up         |

| Gene Title                                   | Gene Symbol      | Entrez Gene            | Putative Function                                                                                                                                                                                                                                               | P-value  | Fold Effect | Regulation |
|----------------------------------------------|------------------|------------------------|-----------------------------------------------------------------------------------------------------------------------------------------------------------------------------------------------------------------------------------------------------------------|----------|-------------|------------|
|                                              |                  |                        | modification // inferred from electronic annotation /// 0051246 // regulation of protein metabolic process // inferred from electronic annotation                                                                                                               |          |             |            |
| ATPase family, AAA domain containing 1       | <i>ATAD1</i>     | <a href="#">506045</a> | ---                                                                                                                                                                                                                                                             | 3.47E-10 | 3.45        | Up         |
| EH-domain containing 4                       | <i>EHD4</i>      | <a href="#">505206</a> | ---                                                                                                                                                                                                                                                             | 1.87E-06 | 3.51        | Up         |
| 2',3'-cyclic nucleotide 3' phosphodiesterase | <i>CNP</i>       | <a href="#">280752</a> | 0007409 // axonogenesis // inferred from electronic annotation /// 0008344 // adult locomotory behavior // inferred from electronic annotation /// 0009214 // cyclic nucleotide catabolic process // inferred from electronic annotation /// 0016070 // RNA met | 3.36E-06 | 3.54        | Up         |
| CD69 molecule                                | <i>CD69</i>      | <a href="#">281058</a> | ---                                                                                                                                                                                                                                                             | 1.33E-09 | 3.55        | Up         |
| similar to NKp80 NK receptor                 | <i>LOC618591</i> | <a href="#">618591</a> | ---                                                                                                                                                                                                                                                             | 3.11E-06 | 3.57        | Up         |
| tumor-associated calcium signal transducer 2 | <i>TACSTD2</i>   | <a href="#">539853</a> | ---                                                                                                                                                                                                                                                             | 4.61E-09 | 3.57        | Up         |
| Major histocompatibility complex, class I    | <i>LOC512672</i> | <a href="#">512672</a> | 0006955 // immune response // inferred from electronic annotation /// 0019882 // antigen processing and presentation // inferred from                                                                                                                           | 1.12E-09 | 3.57        | Up         |



| Gene Title                                                            | Gene Symbol                     | Entrez Gene             | Putative Function                                                                                                                                                                                                                                               | P-value  | Fold Effect | Regulation |
|-----------------------------------------------------------------------|---------------------------------|-------------------------|-----------------------------------------------------------------------------------------------------------------------------------------------------------------------------------------------------------------------------------------------------------------|----------|-------------|------------|
|                                                                       |                                 |                         | electronic annotation                                                                                                                                                                                                                                           |          |             |            |
| PYD and CARD domain containing                                        | <i>PYCARD</i>                   | <a href="#">282846</a>  | 0006508 // proteolysis // inferred from electronic annotation /// 0006915 // apoptosis // inferred from electronic annotation /// 0007049 // cell cycle // inferred from electronic annotation /// 0042981 // regulation of apoptosis // inferred from electron | 1.20E-08 | 3.58        | Up         |
| suppressor of cytokine signaling 1                                    | <i>SOCS1</i>                    | <a href="#">518795</a>  | ---                                                                                                                                                                                                                                                             | 4.33E-09 | 3.62        | Up         |
| interferon-induced protein 35                                         | <i>IFI35</i>                    | <a href="#">510697</a>  | ---                                                                                                                                                                                                                                                             | 2.86E-15 | 3.63        | Up         |
| ubiquitin-conjugating enzyme E2L 6                                    | <i>UBE2L6</i>                   | <a href="#">509471</a>  | 0006512 // ubiquitin cycle // inferred from electronic annotation /// 0043687 // post-translational protein modification // inferred from electronic annotation /// 0051246 // regulation of protein metabolic process // inferred from electronic annotation   | 2.03E-11 | 3.63        | Up         |
| hypothetical LOC510382                                                | <i>LOC510382</i>                | <a href="#">510382</a>  | ---                                                                                                                                                                                                                                                             | 0.000834 | 3.68        | Up         |
| transmembrane protein 45B                                             | <i>TMEM45B</i>                  | 510305<br>///<br>784875 | ---                                                                                                                                                                                                                                                             | 1.22E-07 | 3.68        | Up         |
| chemokine (C-C motif) ligand 2 ///<br>chemokine (C-C motif) ligand 11 | <i>CCL11</i> ///<br><i>CCL2</i> | 281043<br>///           | 0006935 // chemotaxis // inferred from electronic annotation ///<br>0006954 // inflammatory response //                                                                                                                                                         | 2.33E-06 | 3.69        | Up         |

| Gene Title                                         | Gene Symbol  | Entrez Gene            | Putative Function                                                                                                                                                                                                                                                                    | P-value  | Fold Effect | Regulation |
|----------------------------------------------------|--------------|------------------------|--------------------------------------------------------------------------------------------------------------------------------------------------------------------------------------------------------------------------------------------------------------------------------------|----------|-------------|------------|
|                                                    |              | 404072                 | inferred from electronic annotation ///<br>0006955 // immune response //<br>inferred from electronic annotation                                                                                                                                                                      |          |             |            |
| glutathione synthetase                             | <i>GSS</i>   | <a href="#">525059</a> | 0006750 // glutathione biosynthetic<br>process // inferred from electronic<br>annotation                                                                                                                                                                                             | 4.69E-06 | 3.69        | Up         |
| tryptophanyl-tRNA synthetase                       | <i>WARS</i>  | <a href="#">281576</a> | 0006412 // translation // inferred from<br>electronic annotation /// 0006418 //<br>tRNA aminoacylation for protein<br>translation // inferred from electronic<br>annotation /// 0006436 //<br>tryptophanyl-tRNA aminoacylation //<br>inferred from electronic annotation             | 4.43E-11 | 3.71        | Up         |
| complement component 1, q<br>subcomponent, B chain | <i>CIQB</i>  | <a href="#">617435</a> | 0006817 // phosphate transport //<br>inferred from electronic annotation ///<br>0006955 // immune response //<br>inferred from electronic annotation ///<br>0006958 // complement activation,<br>classical pathway // inferred from<br>electronic annotation /// 0045087 //<br>innat | 6.66E-12 | 3.72        | Up         |
| endothelial PAS domain protein 1                   | <i>EPASI</i> | <a href="#">282711</a> | 0006350 // transcription // inferred<br>from electronic annotation ///<br>0006355 // regulation of transcription,<br>DNA-dependent // inferred from<br>electronic annotation /// 0007165 //<br>signal transduction // inferred from<br>electronic annotation /// 0045449 //          | 1.32E-06 | 3.72        | Up         |

| Gene Title                                                            | Gene Symbol                     | Entrez Gene             | Putative Function                                                                                                                                                                                                                                               | P-value  | Fold Effect | Regulation |
|-----------------------------------------------------------------------|---------------------------------|-------------------------|-----------------------------------------------------------------------------------------------------------------------------------------------------------------------------------------------------------------------------------------------------------------|----------|-------------|------------|
|                                                                       |                                 |                         | regul                                                                                                                                                                                                                                                           |          |             |            |
| Spindle assembly 6 homolog (C. elegans)                               | <i>SASS6</i>                    | <a href="#">504467</a>  | ---                                                                                                                                                                                                                                                             | 4.92E-13 | 3.74        | Up         |
| vestigial like 1 (Drosophila)                                         | <i>VGLL1</i>                    | <a href="#">613549</a>  | 0045449 // regulation of transcription<br>// inferred from electronic annotation                                                                                                                                                                                | 7.56E-05 | 3.78        | Up         |
| SP140 nuclear body protein                                            | <i>SP140</i>                    | <a href="#">510377</a>  | ---                                                                                                                                                                                                                                                             | 5.19E-13 | 3.79        | Up         |
| signal transducer and activator of transcription 2, 113kDa            | <i>STAT2</i>                    | <a href="#">511023</a>  | ---                                                                                                                                                                                                                                                             | 1.05E-15 | 3.79        | Up         |
| lymphocyte antigen 6 complex, locus G6C                               | <i>LY6G6C</i>                   | <a href="#">505805</a>  | ---                                                                                                                                                                                                                                                             | 7.22E-07 | 3.81        | Up         |
| ecotropic viral integration site 2B                                   | <i>EVI2B</i>                    | <a href="#">617442</a>  | ---                                                                                                                                                                                                                                                             | 1.57E-07 | 3.84        | Up         |
| carboxypeptidase X (M14 family), member 2                             | <i>CPXM2</i>                    | <a href="#">534505</a>  | ---                                                                                                                                                                                                                                                             | 0.000613 | 3.85        | Up         |
| solute carrier family 38, member 5                                    | <i>SLC38A5</i>                  | <a href="#">512495</a>  | ---                                                                                                                                                                                                                                                             | 5.52E-08 | 3.87        | Up         |
| phosphomevalonate kinase                                              | <i>PMVK</i>                     | <a href="#">513533</a>  | 0006694 // steroid biosynthetic process // inferred from electronic annotation /// 0006695 // cholesterol biosynthetic process // inferred from electronic annotation /// 0008610 // lipid biosynthetic process // inferred from electronic annotation /// 0016 | 2.74E-08 | 3.87        | Up         |
| chemokine (C-C motif) ligand 2 ///<br>chemokine (C-C motif) ligand 11 | <i>CCL11</i> ///<br><i>CCL2</i> | 281043<br>///<br>404072 | 0006935 // chemotaxis // inferred from electronic annotation ///<br>0006954 // inflammatory response // inferred from electronic annotation ///                                                                                                                 | 2.56E-06 | 3.88        | Up         |

| Gene Title                                                                                   | Gene Symbol      | Entrez Gene            | Putative Function                                                                                                                                                                                                                                               | P-value  | Fold Effect | Regulation |
|----------------------------------------------------------------------------------------------|------------------|------------------------|-----------------------------------------------------------------------------------------------------------------------------------------------------------------------------------------------------------------------------------------------------------------|----------|-------------|------------|
|                                                                                              |                  |                        | 0006955 // immune response // inferred from electronic annotation                                                                                                                                                                                               |          |             |            |
| similar to Complement C4-A precursor (Acidic complement C4)                                  | <i>LOC617696</i> | <a href="#">617696</a> | 0006954 // inflammatory response // inferred from electronic annotation /// 0006955 // immune response // inferred from electronic annotation /// 0006956 // complement activation // inferred from electronic annotation /// 0006958 // complement activation, | 9.10E-12 | 3.90        | Up         |
| complement component 1, q subcomponent, C chain                                              | <i>CIQC</i>      | <a href="#">509968</a> | 0006817 // phosphate transport // inferred from electronic annotation                                                                                                                                                                                           | 2.21E-10 | 3.95        | Up         |
| Dickkopf homolog 1 ( <i>Xenopus laevis</i> )                                                 | <i>DKK1</i>      | <a href="#">504445</a> | ---                                                                                                                                                                                                                                                             | 6.43E-08 | 3.95        | Up         |
| lectin, galactoside-binding, soluble, 9 (galectin 9)                                         | <i>LGALS9</i>    | <a href="#">510813</a> | ---                                                                                                                                                                                                                                                             | 1.09E-11 | 3.97        | Up         |
| Pleckstrin homology domain containing, family A (phosphoinositide binding specific) member 4 | <i>PLEKHA4</i>   | <a href="#">510748</a> | ---                                                                                                                                                                                                                                                             | 2.12E-09 | 3.99        | Up         |
| histocompatibility complex, class II, DQ alpha, type 1                                       | <i>BOLA-DQAI</i> | <a href="#">282534</a> | 0002504 // antigen processing and presentation of peptide or polysaccharide antigen via MHC class II // inferred from electronic annotation /// 0006955 // immune response // inferred from electronic annotation /// 0019882 // antigen processing and present | 0.008907 | 4.01        | Up         |

| Gene Title                                             | Gene Symbol         | Entrez Gene            | Putative Function                                                                                                                                                                                                                                               | P-value  | Fold Effect | Regulation |
|--------------------------------------------------------|---------------------|------------------------|-----------------------------------------------------------------------------------------------------------------------------------------------------------------------------------------------------------------------------------------------------------------|----------|-------------|------------|
| uroplakin 1B                                           | <i>UPK1B</i>        | <a href="#">282113</a> | 0030855 // epithelial cell differentiation // inferred from electronic annotation                                                                                                                                                                               | 0.008398 | 4.01        | Up         |
| arginase, type II                                      | <i>ARG2</i>         | <a href="#">518752</a> | 0000050 // urea cycle // inferred from electronic annotation /// 0006525 // arginine metabolic process // inferred from electronic annotation /// 0006527 // arginine catabolic process // inferred from electronic annotation /// 0006941 // striated muscle c | 3.11E-07 | 4.02        | Up         |
| TRIM6-TRIM34                                           | <i>TRIM6-TRIM34</i> | <a href="#">539820</a> | ---                                                                                                                                                                                                                                                             | 6.03E-14 | 4.03        | Up         |
| tumor necrosis factor receptor superfamily, member 13B | <i>TNFRSF13B</i>    | <a href="#">617948</a> | ---                                                                                                                                                                                                                                                             | 2.21E-09 | 4.03        | Up         |
| damage-regulated autophagy modulator                   | <i>DRAM</i>         | <a href="#">533992</a> | ---                                                                                                                                                                                                                                                             | 7.60E-13 | 4.10        | Up         |
| oncostatin M receptor                                  | <i>OSMR</i>         | <a href="#">514720</a> | ---                                                                                                                                                                                                                                                             | 1.21E-05 | 4.18        | Up         |
| cytochrome P450, family 26, subfamily A, polypeptide 1 | <i>CYP26A1</i>      | <a href="#">539047</a> | 0055114 // oxidation reduction // inferred from electronic annotation                                                                                                                                                                                           | 0.002529 | 4.22        | Up         |
| adenosine deaminase, RNA-specific                      | <i>ADAR</i>         | <a href="#">505134</a> | 0006396 // RNA processing // inferred from electronic annotation                                                                                                                                                                                                | 6.89E-17 | 4.24        | Up         |
| regulator of G-protein signaling 16                    | <i>RGS16</i>        | <a href="#">282035</a> | 0009968 // negative regulation of signal transduction // inferred from electronic annotation                                                                                                                                                                    | 2.72E-10 | 4.26        | Up         |

| Gene Title                                             | Gene Symbol      | Entrez Gene            | Putative Function                                                                                                                                                                                                                                               | P-value  | Fold Effect | Regulation |
|--------------------------------------------------------|------------------|------------------------|-----------------------------------------------------------------------------------------------------------------------------------------------------------------------------------------------------------------------------------------------------------------|----------|-------------|------------|
| hematopoietic SH2 domain containing                    | <i>HSH2D</i>     | <a href="#">510693</a> | ---                                                                                                                                                                                                                                                             | 1.41E-06 | 4.31        | Up         |
| similar to hexokinase II                               | <i>LOC614107</i> | <a href="#">614107</a> | 0006096 // glycolysis // inferred from electronic annotation                                                                                                                                                                                                    | 2.43E-16 | 4.36        | Up         |
| similar to Sialic acid binding Ig-like lectin 5        | <i>LOC512863</i> | <a href="#">512863</a> | ---                                                                                                                                                                                                                                                             | 7.85E-06 | 4.42        | Up         |
| shisa homolog 5 ( <i>Xenopus laevis</i> )              | <i>SHISA5</i>    | <a href="#">616861</a> | 0006915 // apoptosis // inferred from electronic annotation                                                                                                                                                                                                     | 1.57E-15 | 4.42        | Up         |
| tudor domain containing 7                              | <i>TDRD7</i>     | <a href="#">506702</a> | ---                                                                                                                                                                                                                                                             | 4.56E-16 | 4.46        | Up         |
| histocompatibility complex, class II, DQ alpha, type 1 | <i>BOLA-DQA1</i> | <a href="#">282534</a> | 0002504 // antigen processing and presentation of peptide or polysaccharide antigen via MHC class II // inferred from electronic annotation /// 0006955 // immune response // inferred from electronic annotation /// 0019882 // antigen processing and present | 0.006714 | 4.46        | Up         |
| Similar to guanylate binding protein 1                 | <i>LOC511531</i> | <a href="#">511531</a> | ---                                                                                                                                                                                                                                                             | 1.21E-06 | 4.47        | Up         |
| CD86 molecule                                          | <i>CD86</i>      | <a href="#">414345</a> | ---                                                                                                                                                                                                                                                             | 9.26E-09 | 4.48        | Up         |
| transmembrane protein 140                              | <i>TMEM140</i>   | <a href="#">515475</a> | ---                                                                                                                                                                                                                                                             | 3.88E-12 | 4.50        | Up         |
| caspase 4, apoptosis-related cysteine peptidase        | <i>CASP4</i>     | <a href="#">338039</a> | 0006508 // proteolysis // inferred from electronic annotation /// 0006915 // apoptosis // inferred from electronic                                                                                                                                              | 9.77E-14 | 4.53        | Up         |

| Gene Title                                                  | Gene Symbol     | Entrez Gene            | Putative Function                                                                                                                                                                                                                                               | P-value  | Fold Effect | Regulation |
|-------------------------------------------------------------|-----------------|------------------------|-----------------------------------------------------------------------------------------------------------------------------------------------------------------------------------------------------------------------------------------------------------------|----------|-------------|------------|
|                                                             |                 |                        | annotation /// 0006917 // induction of apoptosis // traceable author statement /// 0042981 // regulation of apoptosis // inferred from elect                                                                                                                    |          |             |            |
| ataxin 3                                                    | <i>ATXN3</i>    | <a href="#">790880</a> | ---                                                                                                                                                                                                                                                             | 1.47E-12 | 4.55        | Up         |
| caspase 4, apoptosis-related cysteine peptidase             | <i>CASP4</i>    | <a href="#">338039</a> | 0006508 // proteolysis // inferred from electronic annotation /// 0006915 // apoptosis // inferred from electronic annotation /// 0006917 // induction of apoptosis // traceable author statement /// 0042981 // regulation of apoptosis // inferred from elect | 1.01E-15 | 4.61        | Up         |
| meprin A, beta                                              | <i>MEP1B</i>    | <a href="#">540701</a> | 0006508 // proteolysis // inferred from electronic annotation                                                                                                                                                                                                   | 1.94E-07 | 4.62        | Up         |
| similar to TLH29 protein precursor                          | <i>ISG12(B)</i> | <a href="#">617420</a> | ---                                                                                                                                                                                                                                                             | 6.28E-06 | 4.67        | Up         |
| SP140 nuclear body protein                                  | <i>SP140</i>    | <a href="#">510377</a> | ---                                                                                                                                                                                                                                                             | 6.41E-16 | 4.70        | Up         |
| tripartite motif-containing 6                               | <i>TRIM6</i>    | <a href="#">616948</a> | 0016567 // protein ubiquitination // inferred from electronic annotation                                                                                                                                                                                        | 1.77E-13 | 4.71        | Up         |
| unc-93 homolog A (C. elegans)                               | <i>UNC93A</i>   | <a href="#">613535</a> | ---                                                                                                                                                                                                                                                             | 2.30E-07 | 4.75        | Up         |
| interferon-induced protein with tetratricopeptide repeats 5 | <i>IFIT5</i>    | <a href="#">515091</a> | ---                                                                                                                                                                                                                                                             | 1.78E-14 | 4.75        | Up         |
| CAMP responsive element modulator                           | <i>CREM</i>     | <a href="#">540605</a> | 0006350 // transcription // inferred from electronic annotation /// 0006355 // regulation of transcription,                                                                                                                                                     | 1.27E-10 | 4.76        | Up         |

| Gene Title                                                    | Gene Symbol      | Entrez Gene            | Putative Function                                                                                                                                                                                                                                               | P-value  | Fold Effect | Regulation |
|---------------------------------------------------------------|------------------|------------------------|-----------------------------------------------------------------------------------------------------------------------------------------------------------------------------------------------------------------------------------------------------------------|----------|-------------|------------|
|                                                               |                  |                        | DNA-dependent // inferred from electronic annotation                                                                                                                                                                                                            |          |             |            |
| poly (ADP-ribose) polymerase family, member 9                 | <i>PARP9</i>     | <a href="#">510532</a> | ---                                                                                                                                                                                                                                                             | 1.35E-16 | 4.78        | Up         |
| dopa decarboxylase (aromatic L-amino acid decarboxylase)      | <i>DDC</i>       | <a href="#">280762</a> | 0006519 // amino acid and derivative metabolic process // inferred from electronic annotation /// 0019752 // carboxylic acid metabolic process // inferred from electronic annotation /// 0042423 // catecholamine biosynthetic process // inferred from electr | 1.55E-06 | 4.80        | Up         |
| crystallin, alpha B                                           | <i>CRYAB</i>     | <a href="#">281719</a> | 0006916 // anti-apoptosis // inferred from electronic annotation /// 0006916 // anti-apoptosis // inferred from sequence or structural similarity /// 0032387 // negative regulation of intracellular transport // inferred from electronic annotation /// 0032 | 4.46E-12 | 4.81        | Up         |
| nuclear localized factor 1                                    | <i>NLF1</i>      | <a href="#">529849</a> | ---                                                                                                                                                                                                                                                             | 1.54E-07 | 4.87        | Up         |
| solute carrier family 15 (oligopeptide transporter), member 1 | <i>SLC15A1</i>   | <a href="#">521181</a> | 0006857 // oligopeptide transport // inferred from electronic annotation                                                                                                                                                                                        | 1.83E-05 | 4.94        | Up         |
| similar to KIAA0342 protein                                   | <i>LOC509859</i> | <a href="#">509859</a> | ---                                                                                                                                                                                                                                                             | 1.22E-13 | 5.10        | Up         |
| pyrophosphatase (inorganic) 1                                 | <i>PPAI</i>      | <a href="#">280701</a> | 0006796 // phosphate metabolic process // inferred from electronic                                                                                                                                                                                              | 1.10E-17 | 5.22        | Up         |



| Gene Title                                                                                | Gene Symbol                                        | Entrez Gene             | Putative Function                                                                                                                                                               | P-value  | Fold Effect | Regulation |
|-------------------------------------------------------------------------------------------|----------------------------------------------------|-------------------------|---------------------------------------------------------------------------------------------------------------------------------------------------------------------------------|----------|-------------|------------|
|                                                                                           |                                                    |                         | annotation                                                                                                                                                                      |          |             |            |
| poly (ADP-ribose) polymerase family, member 12                                            | <i>PARP12</i>                                      | <a href="#">513185</a>  | ---                                                                                                                                                                             | 4.02E-15 | 5.23        | Up         |
| unc-45 homolog B (C. elegans)                                                             | <i>UNC45B</i>                                      | <a href="#">535385</a>  | ---                                                                                                                                                                             | 4.35E-09 | 5.23        | Up         |
| activating transcription factor 3                                                         | <i>ATF3</i>                                        | <a href="#">515266</a>  | 0006350 // transcription // inferred from electronic annotation ///<br>0006355 // regulation of transcription, DNA-dependent // inferred from electronic annotation             | 8.93E-10 | 5.29        | Up         |
| Fc fragment of IgG, high affinity Ia, receptor (CD64)                                     | <i>FCGR1A</i>                                      | <a href="#">282227</a>  | ---                                                                                                                                                                             | 9.36E-14 | 5.32        | Up         |
| BCL2-like 12 (proline rich)                                                               | <i>BCL2L12</i>                                     | <a href="#">533338</a>  | ---                                                                                                                                                                             | 9.62E-13 | 5.36        | Up         |
| macrophage stimulating 1 receptor (c-met-related tyrosine kinase)                         | <i>MST1R</i>                                       | <a href="#">525504</a>  | 0006468 // protein amino acid phosphorylation // inferred from electronic annotation /// 0007275 // multicellular organismal development // inferred from electronic annotation | 6.85E-12 | 5.44        | Up         |
| NLR family, CARD domain containing 5                                                      | <i>NLRC5</i>                                       | <a href="#">782441</a>  | ---                                                                                                                                                                             | 6.05E-10 | 5.47        | Up         |
| similar to Sialic acid binding Ig-like lectin 5 /// sialic acid binding Ig-like lectin 14 | <i>LOC51286</i><br><i>3</i> ///<br><i>SIGLEC14</i> | 512863<br>///<br>614923 | ---                                                                                                                                                                             | 2.86E-05 | 5.47        | Up         |
| tryptophanyl-tRNA synthetase /// similar to WARS protein                                  | <i>LOC79004</i><br><i>2</i> /// <i>WARS</i>        | 281576<br>///           | 0006412 // translation // inferred from electronic annotation /// 0006418 // tRNA aminoacylation for protein                                                                    | 4.34E-08 | 5.51        | Up         |

| Gene Title                                                                                   | Gene Symbol                              | Entrez Gene            | Putative Function                                                                                                                                                                                  | P-value  | Fold Effect | Regulation |
|----------------------------------------------------------------------------------------------|------------------------------------------|------------------------|----------------------------------------------------------------------------------------------------------------------------------------------------------------------------------------------------|----------|-------------|------------|
|                                                                                              |                                          | 790042                 | translation // inferred from electronic annotation /// 0006436 // tryptophanyl-tRNA aminoacylation // inferred from electronic annotation                                                          |          |             |            |
| deoxyribonuclease I-like 3                                                                   | <i>DNASE1L3</i>                          | <a href="#">512512</a> | 0006308 // DNA catabolic process // inferred from electronic annotation                                                                                                                            | 1.98E-07 | 5.55        | Up         |
| dickkopf homolog 1 (Xenopus laevis)                                                          | <i>DKK1</i>                              | <a href="#">504445</a> | 0007275 // multicellular organismal development // inferred from electronic annotation /// 0030178 // negative regulation of Wnt receptor signaling pathway // inferred from electronic annotation | 7.45E-09 | 5.61        | Up         |
| Minichromosome maintenance complex component 10                                              | <i>MCM10</i>                             | <a href="#">527595</a> | ---                                                                                                                                                                                                | 0.000108 | 5.67        | Up         |
| Pleckstrin homology domain containing, family A (phosphoinositide binding specific) member 4 | <i>PLEKHA4</i>                           | <a href="#">510748</a> | ---                                                                                                                                                                                                | 1.08E-09 | 5.73        | Up         |
| signal transducer and activator of transcription 2, 113kDa                                   | <i>STAT2</i>                             | <a href="#">511023</a> | ---                                                                                                                                                                                                | 4.20E-17 | 5.75        | Up         |
| hypothetical LOC512949 /// hypothetical protein LOC789693                                    | <i>LOC512949</i> ///<br><i>LOC789693</i> | 512949 ///<br>789693   | ---                                                                                                                                                                                                | 5.28E-11 | 5.77        | Up         |
| BCL2-like 15                                                                                 | <i>BCL2L15</i>                           | <a href="#">509786</a> | 0006915 // apoptosis // inferred from electronic annotation                                                                                                                                        | 7.98E-11 | 5.81        | Up         |

| Gene Title                                                             | Gene Symbol     | Entrez Gene            | Putative Function                                                                                                                                                                | P-value  | Fold Effect | Regulation |
|------------------------------------------------------------------------|-----------------|------------------------|----------------------------------------------------------------------------------------------------------------------------------------------------------------------------------|----------|-------------|------------|
| similar to putative ISG12(a) protein                                   | <i>ISG12(A)</i> | <a href="#">507138</a> | 0015992 // proton transport // inferred from electronic annotation                                                                                                               | 1.50E-10 | 5.85        | Up         |
| Rho GTPase activating protein 15                                       | <i>ARHGAP15</i> | <a href="#">616246</a> | 0007165 // signal transduction // inferred from electronic annotation                                                                                                            | 9.90E-08 | 5.89        | Up         |
| chemokine (C-C motif) receptor 7                                       | <i>CCR7</i>     | <a href="#">510668</a> | 0007165 // signal transduction // inferred from electronic annotation /// 0007186 // G-protein coupled receptor protein signaling pathway // inferred from electronic annotation | 1.73E-06 | 6.05        | Up         |
| solute carrier family 16, member 1 (monocarboxylic acid transporter 1) | <i>SLC16A1</i>  | <a href="#">505775</a> | 0006810 // transport // inferred from electronic annotation /// 0015711 // organic anion transport // inferred from electronic annotation                                        | 3.55E-09 | 6.08        | Up         |
| pyridoxal (pyridoxine, vitamin B6) kinase                              | <i>PDXK</i>     | <a href="#">514168</a> | 0008615 // pyridoxine biosynthetic process // inferred from electronic annotation                                                                                                | 2.22E-07 | 6.15        | Up         |
| abhydrolase domain containing 1                                        | <i>ABHD1</i>    | <a href="#">510774</a> | ---                                                                                                                                                                              | 4.57E-14 | 6.22        | Up         |
| arachidonate 5-lipoxygenase-activating protein                         | <i>ALOX5AP</i>  | <a href="#">613869</a> | 0006691 // leukotriene metabolic process // inferred from electronic annotation /// 0019370 // leukotriene biosynthetic process // inferred from electronic annotation           | 2.73E-10 | 6.27        | Up         |
| Forkhead box S1                                                        | <i>FOXS1</i>    | <a href="#">540142</a> | 0006350 // transcription // inferred from electronic annotation /// 0006355 // regulation of transcription,                                                                      | 5.05E-17 | 6.36        | Up         |

| Gene Title                                       | Gene Symbol      | Entrez Gene            | Putative Function                                                                                                                                                                                                                                                     | P-value  | Fold Effect | Regulation |
|--------------------------------------------------|------------------|------------------------|-----------------------------------------------------------------------------------------------------------------------------------------------------------------------------------------------------------------------------------------------------------------------|----------|-------------|------------|
|                                                  |                  |                        | DNA-dependent // inferred from electronic annotation                                                                                                                                                                                                                  |          |             |            |
| guanylate binding protein 4                      | <i>GBP4</i>      | <a href="#">613313</a> | 0006955 // immune response // inferred from electronic annotation                                                                                                                                                                                                     | 1.32E-08 | 6.45        | Up         |
| interferon induced with helicase C domain 1      | <i>IFIH1</i>     | <a href="#">535490</a> | 0042981 // regulation of apoptosis // inferred from electronic annotation                                                                                                                                                                                             | 6.85E-13 | 6.56        | Up         |
| similar to OTTHUMP00000017061                    | <i>LOC616136</i> | <a href="#">616136</a> | ---                                                                                                                                                                                                                                                                   | 2.73E-11 | 6.61        | Up         |
| interferon regulatory factor 9                   | <i>IRF9</i>      | <a href="#">509855</a> | 0006350 // transcription // inferred from electronic annotation ///<br>0006355 // regulation of transcription, DNA-dependent // inferred from electronic annotation                                                                                                   | 5.30E-14 | 6.63        | Up         |
| S100 calcium binding protein A12 (calgranulin C) | <i>S100A12</i>   | <a href="#">282467</a> | ---                                                                                                                                                                                                                                                                   | 1.63E-08 | 6.67        | Up         |
| hypothetical LOC510382                           | <i>LOC510382</i> | <a href="#">510382</a> | ---                                                                                                                                                                                                                                                                   | 0.000939 | 6.74        | Up         |
| interferon, alpha-inducible protein 6            | <i>IFI6</i>      | <a href="#">512913</a> | 0001836 // release of cytochrome c from mitochondria // inferred from sequence or structural similarity ///<br>0006916 // anti-apoptosis // inferred from sequence or structural similarity ///<br>0043154 // negative regulation of caspase activity // inferred fro | 8.22E-15 | 6.91        | Up         |

| Gene Title                                                                                                                         | Gene Symbol      | Entrez Gene            | Putative Function                                                                                                                                                                                                                  | P-value  | Fold Effect | Regulation |
|------------------------------------------------------------------------------------------------------------------------------------|------------------|------------------------|------------------------------------------------------------------------------------------------------------------------------------------------------------------------------------------------------------------------------------|----------|-------------|------------|
| guanylate binding protein 5                                                                                                        | <i>GBP5</i>      | <a href="#">516949</a> | 0006955 // immune response // inferred from electronic annotation                                                                                                                                                                  | 1.63E-08 | 6.95        | Up         |
| hypothetical LOC506759                                                                                                             | <i>LOC506759</i> | <a href="#">506759</a> | ---                                                                                                                                                                                                                                | 4.31E-17 | 7.19        | Up         |
| glycosylphosphatidylinositol specific phospholipase D1                                                                             | <i>GPLD1</i>     | <a href="#">287025</a> | 0006507 // GPI anchor release // inferred from electronic annotation                                                                                                                                                               | 4.18E-06 | 7.39        | Up         |
| interferon induced with helicase C domain 1                                                                                        | <i>IFIH1</i>     | <a href="#">535490</a> | 0042981 // regulation of apoptosis // inferred from electronic annotation                                                                                                                                                          | 1.01E-08 | 7.48        | Up         |
| similar to Interferon-induced guanylate-binding protein 1 (GTP-binding protein 1) (Guanine nucleotide-binding protein 1) (HuGBP-1) | <i>LOC512486</i> | <a href="#">512486</a> | 0006955 // immune response // inferred from electronic annotation                                                                                                                                                                  | 4.01E-11 | 7.58        | Up         |
| polyribonucleotide nucleotidyltransferase 1                                                                                        | <i>PNPT1</i>     | <a href="#">508877</a> | 0005975 // carbohydrate metabolic process // inferred from electronic annotation /// 0006396 // RNA processing // inferred from electronic annotation /// 0006402 // mRNA catabolic process // inferred from electronic annotation | 2.12E-19 | 7.71        | Up         |
| Guanylate binding protein 5                                                                                                        | <i>GBP5</i>      | <a href="#">516949</a> | 0006955 // immune response // inferred from electronic annotation                                                                                                                                                                  | 3.91E-08 | 7.73        | Up         |
| protein associated with topoisomerase II homolog 1 (yeast)                                                                         | <i>PATL1</i>     | <a href="#">537453</a> | ---                                                                                                                                                                                                                                | 4.43E-11 | 7.74        | Up         |
| hypothetical protein LOC783855                                                                                                     | <i>MGC14317</i>  | <a href="#">783855</a> | ---                                                                                                                                                                                                                                | 1.20E-10 | 7.79        | Up         |

| Gene Title                                                | Gene Symbol      | Entrez Gene            | Putative Function                                                                      | P-value  | Fold Effect | Regulation |
|-----------------------------------------------------------|------------------|------------------------|----------------------------------------------------------------------------------------|----------|-------------|------------|
|                                                           | 0                |                        |                                                                                        |          |             |            |
| eukaryotic translation initiation factor 2-alpha kinase 2 | <i>EIF2AK2</i>   | <a href="#">347700</a> | 0006468 // protein amino acid phosphorylation // inferred from electronic annotation   | 1.44E-09 | 7.84        | Up         |
| shisa homolog 2 ( <i>Xenopus laevis</i> )                 | <i>SHISA2</i>    | <a href="#">617336</a> | 0007275 // multicellular organismal development // inferred from electronic annotation | 7.54E-06 | 7.89        | Up         |
| zinc finger, NFX1-type containing 1                       | <i>ZNFX1</i>     | <a href="#">539807</a> | ---                                                                                    | 1.21E-15 | 8.03        | Up         |
| tumor necrosis factor (ligand) superfamily, member 13b    | <i>TNFSF13B</i>  | <a href="#">504507</a> | 0006955 // immune response // inferred from electronic annotation                      | 3.04E-11 | 8.20        | Up         |
| hypothetical protein LOC787376                            | <i>LOC787376</i> | <a href="#">787376</a> | ---                                                                                    | 9.63E-15 | 8.28        | Up         |
| pentraxin-related gene, rapidly induced by IL-1 beta      | <i>PTX3</i>      | <a href="#">541148</a> | ---                                                                                    | 1.44E-09 | 8.32        | Up         |
| placenta-specific 8                                       | <i>PLAC8</i>     | <a href="#">767910</a> | ---                                                                                    | 5.55E-14 | 8.53        | Up         |
| trophoblast Kunitz domain protein 1                       | <i>TKDPI</i>     | <a href="#">404076</a> | ---                                                                                    | 0.00918  | 8.60        | Up         |
| tumor necrosis factor (ligand) superfamily, member 13b    | <i>TNFSF13B</i>  | <a href="#">504507</a> | 0006955 // immune response // inferred from electronic annotation                      | 3.06E-13 | 8.61        | Up         |
| transmembrane protein 140                                 | <i>TMEM140</i>   | <a href="#">515475</a> | ---                                                                                    | 1.61E-10 | 8.65        | Up         |
| poly (ADP-ribose) polymerase family, member 14            | <i>PARP14</i>    | <a href="#">540789</a> | ---                                                                                    | 4.02E-15 | 8.76        | Up         |

| Gene Title                                                                                   | Gene Symbol      | Entrez Gene            | Putative Function                                                                                                                                                                                                    | P-value  | Fold Effect | Regulation |
|----------------------------------------------------------------------------------------------|------------------|------------------------|----------------------------------------------------------------------------------------------------------------------------------------------------------------------------------------------------------------------|----------|-------------|------------|
| myxovirus (influenza virus) resistance 1, interferon-inducible protein p78 (mouse)           | <i>MX1</i>       | <a href="#">280872</a> | 0009615 // response to virus // inferred from electronic annotation                                                                                                                                                  | 1.77E-11 | 9.04        | Up         |
| hypothetical LOC524159                                                                       | <i>LOC524159</i> | <a href="#">524159</a> | ---                                                                                                                                                                                                                  | 1.58E-14 | 9.06        | Up         |
| abhydrolase domain containing 1                                                              | <i>ABHD1</i>     | <a href="#">510774</a> | ---                                                                                                                                                                                                                  | 3.52E-10 | 9.25        | Up         |
| XIAP associated factor 1                                                                     | <i>XAF1</i>      | <a href="#">509740</a> | 0006915 // apoptosis // inferred from electronic annotation /// 0007049 // cell cycle // inferred from electronic annotation /// 0045786 // negative regulation of cell cycle // inferred from electronic annotation | 7.70E-16 | 9.51        | Up         |
| poly (ADP-ribose) polymerase family, member 12                                               | <i>PARP12</i>    | <a href="#">513185</a> | ---                                                                                                                                                                                                                  | 5.50E-15 | 9.58        | Up         |
| receptor (chemosensory) transporter protein 4                                                | <i>RTP4</i>      | <a href="#">532442</a> | ---                                                                                                                                                                                                                  | 1.41E-12 | 9.75        | Up         |
| Similar to hook1 protein                                                                     | <i>LOC785042</i> | <a href="#">785042</a> | 0000226 // microtubule cytoskeleton organization and biogenesis // inferred from electronic annotation                                                                                                               | 2.68E-13 | 9.84        | Up         |
| uterine milk protein precursor                                                               | <i>LOC286871</i> | <a href="#">286871</a> | 0007565 // female pregnancy // inferred from electronic annotation                                                                                                                                                   | 7.19E-07 | 10.11       | Up         |
| pleckstrin homology domain containing, family A (phosphoinositide binding specific) member 4 | <i>PLEKHA4</i>   | <a href="#">510748</a> | ---                                                                                                                                                                                                                  | 2.89E-16 | 10.29       | Up         |

| Gene Title                                                                             | Gene Symbol                                              | Entrez Gene                        | Putative Function                                                                                                                                                                                                                                               | P-value  | Fold Effect | Regulation |
|----------------------------------------------------------------------------------------|----------------------------------------------------------|------------------------------------|-----------------------------------------------------------------------------------------------------------------------------------------------------------------------------------------------------------------------------------------------------------------|----------|-------------|------------|
| Poly (ADP-ribose) polymerase family, member 12                                         | <i>PARP12</i>                                            | <a href="#">513185</a>             | ---                                                                                                                                                                                                                                                             | 3.87E-11 | 10.31       | Up         |
| shisa homolog 3 ( <i>Xenopus laevis</i> )                                              | <i>SHISA3</i>                                            | <a href="#">781091</a>             | ---                                                                                                                                                                                                                                                             | 2.62E-08 | 10.39       | Up         |
| mannosyl (alpha-1,3-)-glycoprotein beta-1,4-N-acetylglucosaminyltransferase, isozyme A | <i>MGAT4A</i>                                            | <a href="#">282276</a>             | 0005975 // carbohydrate metabolic process // inferred from electronic annotation                                                                                                                                                                                | 4.77E-11 | 10.68       | Up         |
| RNA helicase LGP2                                                                      | <i>LGP2</i>                                              | <a href="#">508378</a>             | ---                                                                                                                                                                                                                                                             | 4.61E-14 | 10.72       | Up         |
| transmembrane protein 40                                                               | <i>TMEM40</i>                                            | <a href="#">505490</a>             | ---                                                                                                                                                                                                                                                             | 6.29E-06 | 11.01       | Up         |
| ring finger protein 213                                                                | <i>RNF213</i>                                            | <a href="#">509283</a>             | ---                                                                                                                                                                                                                                                             | 1.64E-11 | 11.14       | Up         |
| keratin 17                                                                             | <i>KRT17</i>                                             | <a href="#">281889</a>             | ---                                                                                                                                                                                                                                                             | 3.50E-09 | 11.27       | Up         |
| arachidonate 12-lipoxygenase                                                           | <i>ALOX12</i>                                            | <a href="#">407169</a>             | 0006691 // leukotriene metabolic process // inferred from electronic annotation /// 0006916 // anti-apoptosis // inferred from sequence or structural similarity /// 0008284 // positive regulation of cell proliferation // inferred from sequence or structur | 8.58E-12 | 11.35       | Up         |
| trophoblast protein-1 /// similar to interferon tau                                    | <i>LOC618974</i> ///<br><i>LOC782273</i> /// <i>TP-1</i> | 317698 ///<br>618974 ///<br>782273 | 0006952 // defense response // inferred from electronic annotation ///<br>0007565 // female pregnancy // inferred from electronic annotation ///<br>0009615 // response to virus // inferred from electronic annotation                                         | 0.003234 | 11.35       | Up         |



| Gene Title                                    | Gene Symbol      | Entrez Gene            | Putative Function                                                                                                                                                                                                    | P-value  | Fold Effect | Regulation |
|-----------------------------------------------|------------------|------------------------|----------------------------------------------------------------------------------------------------------------------------------------------------------------------------------------------------------------------|----------|-------------|------------|
| chemokine (C-X-C motif) ligand 10             | <i>CXCL10</i>    | <a href="#">615107</a> | 0006935 // chemotaxis // inferred from electronic annotation ///<br>0006954 // inflammatory response // inferred from electronic annotation ///<br>0006955 // immune response // inferred from electronic annotation | 3.05E-10 | 11.55       | Up         |
| Hypothetical protein LOC781418                | <i>LOC781418</i> | <a href="#">781418</a> | ---                                                                                                                                                                                                                  | 6.76E-15 | 11.96       | Up         |
| zinc finger, NFX1-type containing 1           | <i>ZNFX1</i>     | <a href="#">539807</a> | 0006355 // regulation of transcription, DNA-dependent // inferred from electronic annotation                                                                                                                         | 1.94E-13 | 12.22       | Up         |
| interferon induced transmembrane protein 5    | <i>IFITM5</i>    | <a href="#">526461</a> | 0009607 // response to biotic stimulus // inferred from electronic annotation                                                                                                                                        | 3.90E-13 | 13.25       | Up         |
| uterine milk protein precursor                | <i>LOC286871</i> | <a href="#">286871</a> | 0007565 // female pregnancy // inferred from electronic annotation                                                                                                                                                   | 2.29E-07 | 13.33       | Up         |
| guanylate binding protein 5                   | <i>GBP5</i>      | <a href="#">516949</a> | 0006955 // immune response // inferred from electronic annotation                                                                                                                                                    | 3.52E-10 | 13.35       | Up         |
| receptor (chemosensory) transporter protein 4 | <i>RTP4</i>      | <a href="#">532442</a> | ---                                                                                                                                                                                                                  | 1.08E-11 | 13.40       | Up         |
| three prime repair exonuclease 1              | <i>TREX1</i>     | <a href="#">282099</a> | 0006281 // DNA repair // inferred from electronic annotation ///<br>0006974 // response to DNA damage stimulus // inferred from electronic annotation                                                                | 1.65E-13 | 13.63       | Up         |

| Gene Title                                                              | Gene Symbol                              | Entrez Gene            | Putative Function                                                                                                                                                                                                                                               | P-value  | Fold Effect | Regulation |
|-------------------------------------------------------------------------|------------------------------------------|------------------------|-----------------------------------------------------------------------------------------------------------------------------------------------------------------------------------------------------------------------------------------------------------------|----------|-------------|------------|
| complement component 2                                                  | <i>C2</i>                                | <a href="#">515440</a> | 0006508 // proteolysis // inferred from electronic annotation /// 0006955 // immune response // inferred from electronic annotation /// 0006956 // complement activation // inferred from electronic annotation /// 0006958 // complement activation, classical | 4.73E-11 | 13.79       | Up         |
| similar to CG33196-PB /// similar to Extracellular proteinase inhibitor | <i>LOC515676</i> ///<br><i>LOC787253</i> | 515676 ///<br>787253   | ---                                                                                                                                                                                                                                                             | 2.72E-06 | 13.80       | Up         |
| poly (ADP-ribose) polymerase family, member 12                          | <i>PARP12</i>                            | <a href="#">513185</a> | ---                                                                                                                                                                                                                                                             | 5.04E-10 | 13.83       | Up         |
| major histocompatibility complex, class II, DQ alpha 2                  | <i>BOLA-DQA2</i>                         | <a href="#">282535</a> | 0002504 // antigen processing and presentation of peptide or polysaccharide antigen via MHC class II // inferred from electronic annotation /// 0006955 // immune response // inferred from electronic annotation /// 0019882 // antigen processing and present | 0.008125 | 13.86       | Up         |
| DEAD (Asp-Glu-Ala-Asp) box polypeptide 58                               | <i>DDX58</i>                             | <a href="#">504760</a> | ---                                                                                                                                                                                                                                                             | 2.27E-14 | 13.89       | Up         |
| ring finger protein 213                                                 | <i>RNF213</i>                            | <a href="#">509283</a> | ---                                                                                                                                                                                                                                                             | 1.19E-11 | 13.94       | Up         |
| ubiquitin-like modifier activating enzyme                               | <i>UBA7</i>                              | <a href="#">497204</a> | 0006464 // protein modification                                                                                                                                                                                                                                 | 1.41E-13 | 13.96       | Up         |

| Gene Title                                    | Gene Symbol  | Entrez Gene               | Putative Function                                                                                                                                                                                                                | P-value  | Fold Effect | Regulation |
|-----------------------------------------------|--------------|---------------------------|----------------------------------------------------------------------------------------------------------------------------------------------------------------------------------------------------------------------------------|----------|-------------|------------|
| 7                                             |              |                           | process // inferred from electronic annotation /// 0006512 // ubiquitin cycle // inferred from electronic annotation /// 0008152 // metabolic process // inferred from electronic annotation                                     |          |             |            |
| placenta-specific 8                           | <i>PLAC8</i> | <a href="#">509228</a>    | ---                                                                                                                                                                                                                              | 3.36E-09 | 13.98       | Up         |
| receptor (chemosensory) transporter protein 4 | <i>RTP4</i>  | <a href="#">532442</a>    | ---                                                                                                                                                                                                                              | 2.59E-11 | 14.23       | Up         |
| 2',5'-oligoadenylate synthetase 1, 40/46kDa   | <i>OASI</i>  | <a href="#">347699</a>    | 0006955 // immune response // inferred from electronic annotation                                                                                                                                                                | 3.03E-13 | 14.75       | Up         |
| crystallin, gamma S                           | <i>CRYGS</i> | <a href="#">281724</a>    | 0002009 // morphogenesis of an epithelium // inferred from electronic annotation /// 0002088 // lens development in camera-type eye // inferred from electronic annotation                                                       | 2.07E-08 | 14.80       | Up         |
| mixed lineage kinase domain-like              | <i>MLKL</i>  | <a href="#">790225</a>    | 0006468 // protein amino acid phosphorylation // inferred from electronic annotation                                                                                                                                             | 8.44E-12 | 15.36       | Up         |
| interferon regulatory factor 7                | <i>IRF7</i>  | <a href="#">100125591</a> | 0006350 // transcription // inferred from electronic annotation /// 0006355 // regulation of transcription, DNA-dependent // inferred from electronic annotation /// 0006810 // transport // inferred from electronic annotation | 6.74E-14 | 15.46       | Up         |

| Gene Title                                                                                                | Gene Symbol                                          | Entrez Gene             | Putative Function                                                                                                                                      | P-value  | Fold Effect | Regulation |
|-----------------------------------------------------------------------------------------------------------|------------------------------------------------------|-------------------------|--------------------------------------------------------------------------------------------------------------------------------------------------------|----------|-------------|------------|
| fructose-1,6-bisphosphatase 1                                                                             | <i>FBP1</i>                                          | <a href="#">513483</a>  | 0005975 // carbohydrate metabolic process // inferred from electronic annotation /// 0006094 // gluconeogenesis // inferred from electronic annotation | 5.64E-06 | 15.56       | Up         |
| Guanylate binding protein 5                                                                               | <i>GBP5</i>                                          | <a href="#">516949</a>  | 0006955 // immune response // inferred from electronic annotation                                                                                      | 1.92E-09 | 17.20       | Up         |
| T-cell immunoglobulin and mucin domain containing 4                                                       | <i>TIMD4</i>                                         | <a href="#">507549</a>  | ---                                                                                                                                                    | 9.89E-13 | 17.59       | Up         |
| fibroblast growth factor-binding protein (FGF-BP) /// similar to fibroblast growth factor-binding protein | <i>LOC281812</i> ///<br><i>LOC783341</i><br><i>1</i> | 281812<br>///<br>783341 | ---                                                                                                                                                    | 7.52E-08 | 17.83       | Up         |
| indoleamine-pyrrole 2,3 dioxygenase                                                                       | <i>INDO</i>                                          | <a href="#">506281</a>  | ---                                                                                                                                                    | 1.80E-12 | 19.73       | Up         |
| ubiquitin specific peptidase 18                                                                           | <i>USP18</i>                                         | <a href="#">515202</a>  | 0006511 // ubiquitin-dependent protein catabolic process // inferred from electronic annotation                                                        | 1.64E-14 | 20.07       | Up         |
| Interferon-induced protein 44                                                                             | <i>IFI44</i>                                         | <a href="#">508348</a>  | ---                                                                                                                                                    | 1.49E-12 | 20.38       | Up         |
| sterile alpha motif domain containing 9                                                                   | <i>SAMD9</i>                                         | <a href="#">514205</a>  | ---                                                                                                                                                    | 5.36E-14 | 24.15       | Up         |
| ubiquitin specific peptidase 18                                                                           | <i>USP18</i>                                         | <a href="#">515202</a>  | 0006511 // ubiquitin-dependent protein catabolic process // inferred from electronic annotation                                                        | 1.62E-13 | 24.66       | Up         |
| interferon-induced protein 44                                                                             | <i>IFI44</i>                                         | <a href="#">508348</a>  | ---                                                                                                                                                    | 1.76E-12 | 25.03       | Up         |

| Gene Title                                                                        | Gene Symbol                              | Entrez Gene             | Putative Function                                                                                                                                                                                                    | P-value  | Fold Effect | Regulation |
|-----------------------------------------------------------------------------------|------------------------------------------|-------------------------|----------------------------------------------------------------------------------------------------------------------------------------------------------------------------------------------------------------------|----------|-------------|------------|
| fatty acid binding protein 3, muscle and heart (mammary-derived growth inhibitor) | <i>FABP3</i>                             | <a href="#">281758</a>  | 0006656 // phosphatidylcholine biosynthetic process // inferred from electronic annotation /// 0006810 // transport // inferred from electronic annotation                                                           | 3.16E-11 | 27.47       | Up         |
| Similar to lipopolysaccharide binding protein                                     | <i>LOC51497</i><br>8                     | <a href="#">514978</a>  | ---                                                                                                                                                                                                                  | 1.80E-20 | 27.62       | Up         |
| chemokine (C-C motif) ligand 8                                                    | <i>CCL8</i>                              | 281044<br>///<br>788169 | 0006935 // chemotaxis // inferred from electronic annotation ///<br>0006954 // inflammatory response // inferred from electronic annotation ///<br>0006955 // immune response // inferred from electronic annotation | 3.38E-12 | 28.05       | Up         |
| sialic acid binding Ig-like lectin 1, sialoadhesin                                | <i>SIGLEC1</i>                           | <a href="#">539759</a>  | ---                                                                                                                                                                                                                  | 4.56E-20 | 30.09       | Up         |
| similar to lipopolysaccharide binding protein                                     | <i>LOC51497</i><br>8                     | <a href="#">514978</a>  | ---                                                                                                                                                                                                                  | 7.10E-19 | 31.25       | Up         |
| radical S-adenosyl methionine domain containing 2                                 | <i>RSAD2</i>                             | <a href="#">506415</a>  | 0009615 // response to virus // inferred from electronic annotation ///<br>0051607 // defense response to virus // inferred from sequence or structural similarity                                                   | 1.59E-10 | 31.91       | Up         |
| interferon-induced protein 44 ///<br>hypothetical protein LOC790424               | <i>IFI44</i> ///<br><i>LOC79042</i><br>4 | 508348<br>///<br>790424 | ---                                                                                                                                                                                                                  | 1.69E-12 | 33.15       | Up         |

| Gene Title                                    | Gene Symbol        | Entrez Gene               | Putative Function                                                                                                                                                                                                                                               | P-value  | Fold Effect | Regulation |
|-----------------------------------------------|--------------------|---------------------------|-----------------------------------------------------------------------------------------------------------------------------------------------------------------------------------------------------------------------------------------------------------------|----------|-------------|------------|
| ISG15 ubiquitin-like modifier                 | <i>ISG15</i>       | <a href="#">281871</a>    | 0006464 // protein modification process // inferred from electronic annotation /// 0006512 // ubiquitin cycle // inferred from electronic annotation /// 0009615 // response to virus // inferred from electronic annotation /// 0019941 // modification-depend | 2.32E-11 | 33.54       | Up         |
| Similar to Interferon-induced protein 44-like | <i>LOC508347</i>   | <a href="#">508347</a>    | ---                                                                                                                                                                                                                                                             | 5.60E-14 | 34.05       | Up         |
| interferon regulatory factor 7                | <i>IRF7</i>        | <a href="#">100125591</a> | 0006350 // transcription // inferred from electronic annotation /// 0006355 // regulation of transcription, DNA-dependent // inferred from electronic annotation /// 0006810 // transport // inferred from electronic annotation                                | 2.37E-11 | 34.49       | Up         |
| peroxidasin homolog (Drosophila)              | <i>PXDN</i>        | <a href="#">515860</a>    | 0006468 // protein amino acid phosphorylation // inferred from electronic annotation /// 0006979 // response to oxidative stress // inferred from electronic annotation /// 0007155 // cell adhesion // inferred from electronic annotation                     | 9.44E-14 | 44.13       | Up         |
| Chromosome 11 open reading frame 34 ortholog  | <i>H15C11ORF34</i> | <a href="#">505518</a>    | ---                                                                                                                                                                                                                                                             | 5.96E-13 | 44.63       | Up         |
| Similar to Bone marrow stromal cell           | <i>LOC50740</i>    | <a href="#">507402</a>    | ---                                                                                                                                                                                                                                                             | 2.79E-11 | 44.82       | Up         |

| Gene Title                                                  | Gene Symbol                   | Entrez Gene            | Putative Function                                                                               | P-value  | Fold Effect | Regulation |
|-------------------------------------------------------------|-------------------------------|------------------------|-------------------------------------------------------------------------------------------------|----------|-------------|------------|
| antigen 2                                                   | 2                             |                        |                                                                                                 |          |             |            |
| interferon-induced protein 44                               | <i>IFI44</i>                  | <a href="#">508348</a> | ---                                                                                             | 4.55E-11 | 50.01       | Up         |
| indoleamine-pyrrole 2,3 dioxygenase                         | <i>INDO</i>                   | <a href="#">506281</a> | ---                                                                                             | 7.89E-12 | 64.46       | Up         |
| Similar to Bone marrow stromal cell antigen 2               | <i>LOC50740</i><br>2          | <a href="#">507402</a> | ---                                                                                             | 1.39E-10 | 69.36       | Up         |
| ubiquitin specific peptidase 18                             | <i>USP18</i>                  | <a href="#">515202</a> | 0006511 // ubiquitin-dependent protein catabolic process // inferred from electronic annotation | 9.18E-12 | 79.24       | Up         |
| interferon-induced protein with tetratricopeptide repeats 2 | <i>IFIT2</i>                  | <a href="#">527528</a> | ---                                                                                             | 9.72E-13 | 84.14       | Up         |
| Ubiquitin specific peptidase 18                             | <i>USP18</i>                  | <a href="#">515202</a> | 0006511 // ubiquitin-dependent protein catabolic process // inferred from electronic annotation | 2.07E-11 | 94.13       | Up         |
| interferon stimulated exonuclease gene 20kDa                | <i>ISG20</i>                  | <a href="#">506604</a> | ---                                                                                             | 2.35E-15 | 140.99      | Up         |
| myxovirus (influenza virus) resistance 2 (mouse)            | <i>MX2</i>                    | <a href="#">280873</a> | 0009615 // response to virus // inferred from electronic annotation                             | 5.45E-13 | 224.96      | Up         |
| C-type lectin domain family 4, member F                     | <i>CLEC4F</i>                 | <a href="#">511001</a> | ---                                                                                             | 5.65E-23 | 404.60      | Up         |
| chromosome 11 open reading frame 34 ortholog                | <i>C15H11OR</i><br><i>F34</i> | <a href="#">505518</a> | ---                                                                                             | 3.74E-15 | 417.90      | Up         |
