# Supplementary material
Source: PubMed Central journal article supplement (PMC7094660)
Supplement: mmc3.pdf [file mmc3.pdf]

**Supplement 3.** List of genes affected by lactation in the intercaruncular endometrium on d 17 of the cycle or pregnancy. Genes were selected based on an absolute expression value > 40 and P-value <0.01. Fold effect and regulation columns consider the effects of lactation using the endometrium from non-lactating cows as the reference. (i.e. Down regulation means the endometrium from a non-lactating cow has a lower gene expression than the endometrium of a lactating cow)

| Gene Title                                           | Gene Symbol  | Entrez Gene            | Putative Function                                                                                                                                                                                                                   | P-value   | Fold Effect | Regulation |
|------------------------------------------------------|--------------|------------------------|-------------------------------------------------------------------------------------------------------------------------------------------------------------------------------------------------------------------------------------|-----------|-------------|------------|
| retinyl ester hydrolase type 1                       | <i>BREH1</i> | <a href="#">497207</a> | ---                                                                                                                                                                                                                                 | 0.0028379 | 0.43        | Down       |
| dickkopf homolog 1 (Xenopus laevis)                  | <i>DKK1</i>  | <a href="#">504445</a> | 0007275 // multicellular organismal development // inferred from electronic annotation /// 0030178 // negative regulation of Wnt receptor signaling pathway // inferred from electronic annotation                                  | 0.002016  | 0.52        | Down       |
| actin, alpha 2, smooth muscle, aorta                 | <i>ACTA2</i> | <a href="#">515610</a> | 0030240 // muscle thin filament assembly // inferred from sequence or structural similarity /// 0048741 // skeletal muscle fiber development // inferred from sequence or structural similarity                                     | 0.0068066 | 0.53        | Down       |
| carbonic anhydrase XI                                | <i>CA11</i>  | <a href="#">326334</a> | 0006730 // one-carbon compound metabolic process // inferred from electronic annotation                                                                                                                                             | 0.000727  | 0.53        | Down       |
| hairy/enhancer-of-split related with YRPW motif-like | <i>HEYL</i>  | <a href="#">538609</a> | 0006350 // transcription // inferred from electronic annotation /// 0006355 // regulation of transcription, DNA-dependent // inferred from electronic annotation /// 0007219 // Notch signaling pathway // inferred from electronic | 0.0007698 | 0.56        | Down       |

| Gene Title                                            | Gene Symbol      | Entrez Gene            | Putative Function                                                                                                                                                                                                | P-value   | Fold Effect | Regulation |
|-------------------------------------------------------|------------------|------------------------|------------------------------------------------------------------------------------------------------------------------------------------------------------------------------------------------------------------|-----------|-------------|------------|
|                                                       |                  |                        | annotation /// 0007275 // m                                                                                                                                                                                      |           |             |            |
| cell growth regulator with EF-hand domain 1           | <i>CGREF1</i>    | <a href="#">507586</a> | ---                                                                                                                                                                                                              | 0.0001387 | 0.57        | Down       |
| MAS-related GPR, member F                             | <i>MRGPRF</i>    | <a href="#">615886</a> | 0007186 // G-protein coupled receptor protein signaling pathway // inferred from electronic annotation                                                                                                           | 0.0030688 | 0.59        | Down       |
| transmembrane protein 88                              | <i>TMEM88</i>    | <a href="#">507172</a> | ---                                                                                                                                                                                                              | 8.55E-06  | 0.59        | Down       |
| remodeling and spacing factor 1                       | <i>RSF1</i>      | <a href="#">541248</a> | ---                                                                                                                                                                                                              | 0.0091683 | 0.59        | Down       |
| Dickkopf homolog 1 (Xenopus laevis)                   | <i>DKK1</i>      | <a href="#">504445</a> | ---                                                                                                                                                                                                              | 0.0065874 | 0.60        | Down       |
| tenomodulin                                           | <i>TNMD</i>      | <a href="#">532034</a> | ---                                                                                                                                                                                                              | 0.0004339 | 0.60        | Down       |
| EGF-like-domain, multiple 8                           | <i>EGFL8</i>     | <a href="#">782820</a> | ---                                                                                                                                                                                                              | 0.000844  | 0.61        | Down       |
| Fc fragment of IgG, low affinity IIb, receptor (CD32) | <i>FCGR2B</i>    | <a href="#">282229</a> | ---                                                                                                                                                                                                              | 0.0007528 | 0.61        | Down       |
| chromosome 21 open reading frame 7 ortholog           | <i>CIH21ORF7</i> | <a href="#">540879</a> | ---                                                                                                                                                                                                              | 0.0009234 | 0.63        | Down       |
| placental growth factor                               | <i>PGF</i>       | <a href="#">280894</a> | 0001525 // angiogenesis // inferred from electronic annotation /// 0001658 // ureteric bud branching // inferred from electronic annotation /// 0007275 // multicellular organismal development // inferred from | 0.0008491 | 0.63        | Down       |

| Gene Title                                              | Gene Symbol      | Entrez Gene            | Putative Function                                                                                  | P-value   | Fold Effect | Regulation |
|---------------------------------------------------------|------------------|------------------------|----------------------------------------------------------------------------------------------------|-----------|-------------|------------|
|                                                         |                  |                        | electronic annotation /// 0008283 // cell prol                                                     |           |             |            |
| calponin 1, basic, smooth muscle                        | <i>CNN1</i>      | <a href="#">534583</a> | 0031032 // actomyosin structure organization and biogenesis // inferred from electronic annotation | 0.0057248 | 0.63        | Down       |
| tenomodulin                                             | <i>TNMD</i>      | <a href="#">781292</a> | ---                                                                                                | 0.0077429 | 0.64        | Down       |
| proline rich 15                                         | <i>PRR15</i>     | <a href="#">538952</a> | ---                                                                                                | 0.000313  | 0.64        | Down       |
| transmembrane protein 100                               | <i>TMEM100</i>   | <a href="#">613987</a> | ---                                                                                                | 0.0023752 | 0.64        | Down       |
| hypothetical LOC515053                                  | <i>LOC515053</i> | <a href="#">515053</a> | ---                                                                                                | 0.0031781 | 0.66        | Down       |
| major facilitator superfamily domain containing 2       | <i>MFSD2</i>     | <a href="#">512633</a> | ---                                                                                                | 0.0053781 | 0.66        | Down       |
| Coiled-coil-helix-coiled-coil-helix domain containing 6 | <i>CHCHD6</i>    | <a href="#">615934</a> | ---                                                                                                | 0.0024265 | 0.68        | Down       |
| hemicentin 1                                            | <i>HMCN1</i>     | <a href="#">521326</a> | ---                                                                                                | 0.006747  | 0.69        | Down       |
| epoxide hydrolase 1, microsomal (xenobiotic)            | <i>EPHX1</i>     | <a href="#">535293</a> | 0009636 // response to toxin // inferred from electronic annotation                                | 0.0063922 | 0.70        | Down       |
| FLYWCH family member 2                                  | <i>FLYWCH2</i>   | <a href="#">618572</a> | ---                                                                                                | 0.0002608 | 0.70        | Down       |
| carbonic anhydrase VB, mitochondrial                    | <i>CA5B</i>      | <a href="#">514494</a> | 0006730 // one-carbon compound metabolic process // inferred from electronic annotation            | 0.0054674 | 0.70        | Down       |

| Gene Title                                            | Gene Symbol      | Entrez Gene               | Putative Function                                                                                                                                                           | P-value   | Fold Effect | Regulation |
|-------------------------------------------------------|------------------|---------------------------|-----------------------------------------------------------------------------------------------------------------------------------------------------------------------------|-----------|-------------|------------|
| tumor necrosis factor, alpha-induced protein 6        | <i>TNFAIP6</i>   | <a href="#">493710</a>    | 0007155 // cell adhesion // inferred from electronic annotation                                                                                                             | 0.0001667 | 0.70        | Down       |
| microcephalin 1                                       | <i>MCPH1</i>     | <a href="#">100125236</a> | ---                                                                                                                                                                         | 0.0013684 | 0.71        | Down       |
| lectin, mannose-binding 2-like                        | <i>LMAN2L</i>    | <a href="#">539289</a>    | 0015031 // protein transport // inferred from electronic annotation                                                                                                         | 0.00377   | 0.72        | Down       |
| hypothetical LOC618094                                | <i>LOC618094</i> | <a href="#">618094</a>    | ---                                                                                                                                                                         | 0.0005474 | 0.72        | Down       |
| folate receptor 2 (fetal)                             | <i>FOLR2</i>     | <a href="#">507672</a>    | ---                                                                                                                                                                         | 0.0036608 | 0.72        | Down       |
| phosphatidylethanolamine N-methyltransferase          | <i>PEMT</i>      | <a href="#">360197</a>    | 0006644 // phospholipid metabolic process // inferred from electronic annotation ///<br>0008654 // phospholipid biosynthetic process // inferred from electronic annotation | 0.0050417 | 0.72        | Down       |
| dimethylglycine dehydrogenase                         | <i>DMGDH</i>     | <a href="#">504453</a>    | ---                                                                                                                                                                         | 0.0062243 | 0.72        | Down       |
| fasciculation and elongation protein zeta 1 (zygin I) | <i>FEZ1</i>      | <a href="#">511751</a>    | ---                                                                                                                                                                         | 0.0082663 | 0.72        | Down       |
| S100 calcium binding protein A4                       | <i>S100A4</i>    | <a href="#">282343</a>    | ---                                                                                                                                                                         | 0.0010621 | 0.72        | Down       |
| similar to B0432.9                                    | <i>LOC505636</i> | <a href="#">505636</a>    | ---                                                                                                                                                                         | 0.0009182 | 0.73        | Down       |
| similar to nonclathrin coat                           | <i>LOC616222</i> | <a href="#">616222</a>    | ---                                                                                                                                                                         | 0.0012836 | 0.73        | Down       |

| Gene Title                                                                 | Gene Symbol                          | Entrez Gene            | Putative Function                                                                                                                              | P-value   | Fold Effect | Regulation |
|----------------------------------------------------------------------------|--------------------------------------|------------------------|------------------------------------------------------------------------------------------------------------------------------------------------|-----------|-------------|------------|
| protein zeta-COP                                                           |                                      |                        |                                                                                                                                                |           |             |            |
| Fc fragment of IgG, low affinity IIIa, receptor (CD16a)                    | <i>FCGR3A</i>                        | <a href="#">281766</a> | ---                                                                                                                                            | 0.0013428 | 0.73        | Down       |
| BEX family member 5                                                        | <i>BEX5</i>                          | <a href="#">516056</a> | ---                                                                                                                                            | 0.0023283 | 0.73        | Down       |
| similar to RP5-860F19.3                                                    | <i>LOC506470</i>                     | <a href="#">506470</a> | ---                                                                                                                                            | 0.0010319 | 0.73        | Down       |
| chromosome 12 open reading frame 57 ortholog                               | <i>C5H12ORF57</i>                    | <a href="#">511545</a> | ---                                                                                                                                            | 0.000367  | 0.74        | Down       |
| sideroflexin 3                                                             | <i>SFXN3</i>                         | <a href="#">511755</a> | 0006812 // cation transport // inferred from electronic annotation                                                                             | 0.0068119 | 0.74        | Down       |
| XTP3-transactivated protein A                                              | <i>XTP3TPA</i>                       | <a href="#">614103</a> | ---                                                                                                                                            | 0.0049676 | 0.75        | Down       |
| homeodomain interacting protein kinase 1                                   | <i>HIPK1</i>                         | <a href="#">512233</a> | 0006468 // protein amino acid phosphorylation // inferred from electronic annotation                                                           | 0.0020695 | 0.75        | Down       |
| CDNA clone IMAGE:8067330                                                   | ---                                  | ---                    | ---                                                                                                                                            | 0.0009851 | 0.75        | Down       |
| similar to OB-cadherin-1 /// cadherin 11, type 2, OB-cadherin (osteoblast) | <i>CDH11</i> ///<br><i>LOC535363</i> | 535363 ///<br>785475   | 0007155 // cell adhesion // inferred from electronic annotation /// 0007156 // homophilic cell adhesion // inferred from electronic annotation | 0.0041965 | 0.75        | Down       |
| GRP1 (general receptor for phosphoinositides 1)-                           | <i>GRASP</i>                         | <a href="#">507181</a> | ---                                                                                                                                            | 0.0060476 | 0.76        | Down       |

| Gene Title                                                                                | Gene Symbol      | Entrez Gene            | Putative Function                                                                                                                                                                                                                                               | P-value   | Fold Effect | Regulation |
|-------------------------------------------------------------------------------------------|------------------|------------------------|-----------------------------------------------------------------------------------------------------------------------------------------------------------------------------------------------------------------------------------------------------------------|-----------|-------------|------------|
| associated scaffold protein                                                               |                  |                        |                                                                                                                                                                                                                                                                 |           |             |            |
| LATS, large tumor suppressor, homolog 2 (Drosophila)                                      | <i>LATS2</i>     | <a href="#">508208</a> | 0006468 // protein amino acid phosphorylation // inferred from electronic annotation /// 0008152 // metabolic process // inferred from electronic annotation                                                                                                    | 0.0031044 | 0.76        | Down       |
| potassium channel tetramerisation domain containing 11                                    | <i>KCTD11</i>    | <a href="#">539167</a> | 0001558 // regulation of cell growth // inferred from electronic annotation /// 0006813 // potassium ion transport // inferred from electronic annotation /// 0007049 // cell cycle // inferred from electronic annotation /// 0007275 // multicellular organis | 0.0041659 | 0.76        | Down       |
| kallikrein 1                                                                              | <i>KLK1</i>      | <a href="#">493738</a> | 0006508 // proteolysis // inferred from electronic annotation                                                                                                                                                                                                   | 0.0066673 | 0.76        | Down       |
| similar to RCL                                                                            | <i>LOC613560</i> | <a href="#">613560</a> | ---                                                                                                                                                                                                                                                             | 0.0058554 | 0.77        | Down       |
| galactose-1-phosphate uridylyltransferase                                                 | <i>GALT</i>      | <a href="#">506997</a> | 0005975 // carbohydrate metabolic process // inferred from electronic annotation /// 0006012 // galactose metabolic process // inferred from electronic annotation                                                                                              | 0.0001244 | 0.77        | Down       |
| hypothetical protein LOC783163                                                            | <i>LOC783163</i> | <a href="#">783163</a> | ---                                                                                                                                                                                                                                                             | 0.0057849 | 0.78        | Down       |
| potassium intermediate/small conductance calcium-activated channel, subfamily N, member 2 | <i>KCNN2</i>     | <a href="#">404177</a> | 0006813 // potassium ion transport // inferred from electronic annotation                                                                                                                                                                                       | 0.0098628 | 0.78        | Down       |

| Gene Title                                       | Gene Symbol      | Entrez Gene            | Putative Function                                                                                                                                                                                                                                               | P-value   | Fold Effect | Regulation |
|--------------------------------------------------|------------------|------------------------|-----------------------------------------------------------------------------------------------------------------------------------------------------------------------------------------------------------------------------------------------------------------|-----------|-------------|------------|
| tubulin, beta 6                                  | <i>TUBB6</i>     | <a href="#">534206</a> | 0007017 // microtubule-based process // inferred from electronic annotation ///<br>0007018 // microtubule-based movement // inferred from electronic annotation ///<br>0051258 // protein polymerization // inferred from electronic annotation                 | 0.0012553 | 0.78        | Down       |
| hypothetical protein MGC128424                   | <i>MGC128424</i> | <a href="#">767924</a> | ---                                                                                                                                                                                                                                                             | 0.0058502 | 0.78        | Down       |
| similar to tigger transposable element derived 5 | <i>LOC540422</i> | <a href="#">540422</a> | ---                                                                                                                                                                                                                                                             | 0.0008992 | 0.79        | Down       |
| minichromosome maintenance complex component 5   | <i>MCM5</i>      | <a href="#">506970</a> | 0006260 // DNA replication // inferred from electronic annotation /// 0006270 // DNA replication initiation // inferred from electronic annotation /// 0006350 // transcription // inferred from electronic annotation /// 0006355 // regulation of transcripti | 0.0052936 | 0.79        | Down       |
| brain expressed X-linked 2                       | <i>BEX2</i>      | <a href="#">768028</a> | ---                                                                                                                                                                                                                                                             | 0.0060616 | 0.79        | Down       |
| hypothetical LOC535329                           | <i>LOC535329</i> | <a href="#">535329</a> | ---                                                                                                                                                                                                                                                             | 0.0052257 | 0.79        | Down       |
| doublecortin-like kinase 1                       | <i>DCLK1</i>     | <a href="#">613449</a> | 0007242 // intracellular signaling cascade // inferred from electronic annotation                                                                                                                                                                               | 0.0072226 | 0.79        | Down       |
| mediator complex subunit 29                      | <i>MED29</i>     | <a href="#">614626</a> | 0006350 // transcription // inferred from electronic annotation /// 0006355 // regulation of transcription, DNA-dependent // inferred from electronic                                                                                                           | 0.0025694 | 0.79        | Down       |

| Gene Title                                                 | Gene Symbol                          | Entrez Gene            | Putative Function                                                                                                                                                                                          | P-value   | Fold Effect | Regulation |
|------------------------------------------------------------|--------------------------------------|------------------------|------------------------------------------------------------------------------------------------------------------------------------------------------------------------------------------------------------|-----------|-------------|------------|
|                                                            |                                      |                        | annotation                                                                                                                                                                                                 |           |             |            |
| Hypothetical protein<br>LOC538173                          | <i>LOC538173</i>                     | <a href="#">538173</a> | 0005975 // carbohydrate metabolic process<br>// inferred from electronic annotation ///<br>0008152 // metabolic process // inferred<br>from electronic annotation                                          | 0.0077394 | 0.79        | Down       |
| Zinc finger protein 45                                     | <i>ZNF45</i>                         | <a href="#">540342</a> | 0006355 // regulation of transcription,<br>DNA-dependent // inferred from electronic<br>annotation                                                                                                         | 0.0035491 | 0.79        | Down       |
| transmembrane protein 119                                  | <i>TMEM119</i>                       | <a href="#">510926</a> | ---                                                                                                                                                                                                        | 0.0031039 | 0.80        | Down       |
| ATP-binding cassette, sub-<br>family D (ALD), member 1     | <i>ABCD1</i>                         | <a href="#">515178</a> | 0006810 // transport // inferred from<br>electronic annotation                                                                                                                                             | 0.0071784 | 0.80        | Down       |
| tumor suppressing<br>subtransferable candidate 4           | <i>TSSC4</i>                         | <a href="#">509559</a> | ---                                                                                                                                                                                                        | 0.0043477 | 0.80        | Down       |
| mitochondrial ribosomal<br>protein L48                     | <i>MRPL48</i>                        | <a href="#">615873</a> | 0006412 // translation // inferred from<br>electronic annotation                                                                                                                                           | 0.0026401 | 0.81        | Down       |
| Family with sequence<br>similarity 33, member A            | <i>FAM33A</i>                        | <a href="#">615847</a> | 0007049 // cell cycle // inferred from<br>electronic annotation /// 0007067 // mitosis<br>// inferred from electronic annotation ///<br>0051301 // cell division // inferred from<br>electronic annotation | 0.0013308 | 0.81        | Down       |
| brain protein 44-like                                      | <i>BRP44L</i>                        | <a href="#">767977</a> | ---                                                                                                                                                                                                        | 0.0044743 | 0.81        | Down       |
| similar to NAC-beta splice ///<br>NLR family, pyrin domain | <i>LOC528166</i> ///<br><i>NLRP1</i> | 528166 ///<br>790698   | 0006952 // defense response // inferred<br>from electronic annotation                                                                                                                                      | 0.0013802 | 0.81        | Down       |



| Gene Title                                                                      | Gene Symbol      | Entrez Gene            | Putative Function                                                                                                                                                                         | P-value   | Fold Effect | Regulation |
|---------------------------------------------------------------------------------|------------------|------------------------|-------------------------------------------------------------------------------------------------------------------------------------------------------------------------------------------|-----------|-------------|------------|
| containing 1                                                                    |                  |                        |                                                                                                                                                                                           |           |             |            |
| lectin, galactoside-binding, soluble, 1 (galectin 1)                            | <i>LGALS1</i>    | <a href="#">326598</a> | 0043123 // positive regulation of I-kappaB kinase/NF-kappaB cascade // inferred from electronic annotation /// 0045445 // myoblast differentiation // inferred from electronic annotation | 0.0009417 | 0.81        | Down       |
| Hypothetical LOC538666                                                          | <i>MGC139309</i> | <a href="#">538666</a> | ---                                                                                                                                                                                       | 0.0037929 | 0.81        | Down       |
| Islet cell autoantigen 1, 69kDa                                                 | <i>ICA1</i>      | <a href="#">535346</a> | ---                                                                                                                                                                                       | 0.0055213 | 0.81        | Down       |
| Progestin and adipoQ receptor family member III                                 | <i>PAQR3</i>     | <a href="#">534876</a> | ---                                                                                                                                                                                       | 0.0005713 | 0.82        | Down       |
| BCL2-associated athanogene 3                                                    | <i>BAG3</i>      | <a href="#">782633</a> | 0006915 // apoptosis // inferred from electronic annotation                                                                                                                               | 3.15E-05  | 0.82        | Down       |
| transglutaminase 2 (C polypeptide, protein-glutamine-gamma-glutamyltransferase) | <i>TGM2</i>      | <a href="#">281528</a> | 0018149 // peptide cross-linking // inferred from electronic annotation                                                                                                                   | 0.0084226 | 0.82        | Down       |
| DNL-type zinc finger                                                            | <i>DNLZ</i>      | <a href="#">514124</a> | 0045449 // regulation of transcription // inferred from electronic annotation                                                                                                             | 0.0009163 | 0.82        | Down       |
| mediator complex subunit 11                                                     | <i>MED11</i>     | <a href="#">511672</a> | 0006350 // transcription // inferred from electronic annotation /// 0006355 // regulation of transcription, DNA-dependent // inferred from electronic annotation                          | 0.0062011 | 0.82        | Down       |

| Gene Title                                                                      | Gene Symbol                             | Entrez Gene            | Putative Function                                                                                                                | P-value   | Fold Effect | Regulation |
|---------------------------------------------------------------------------------|-----------------------------------------|------------------------|----------------------------------------------------------------------------------------------------------------------------------|-----------|-------------|------------|
| glyoxylate reductase/hydroxypyruvate reductase                                  | <i>GRHPR</i>                            | <a href="#">504764</a> | 0008152 // metabolic process // inferred from electronic annotation                                                              | 0.0071698 | 0.82        | Down       |
| KIAA0922-like                                                                   | <i>LOC505156</i>                        | <a href="#">505156</a> | ---                                                                                                                              | 0.0032555 | 0.82        | Down       |
| CDC28 protein kinase regulatory subunit 1B                                      | <i>CKS1B</i>                            | <a href="#">615827</a> | 0007049 // cell cycle // inferred from electronic annotation /// 0051301 // cell division // inferred from electronic annotation | 0.0055198 | 0.82        | Down       |
| chromosome 6 open reading frame 129 ortholog                                    | <i>C23H6orf129</i>                      | <a href="#">507353</a> | ---                                                                                                                              | 0.001545  | 0.82        | Down       |
| catechol-O-methyltransferase domain containing 1                                | <i>COMTD1</i>                           | <a href="#">514949</a> | ---                                                                                                                              | 0.0090101 | 0.82        | Down       |
| nicolin 1                                                                       | <i>NICN1</i>                            | <a href="#">614730</a> | ---                                                                                                                              | 0.005362  | 0.82        | Down       |
| chromatin accessibility complex 1                                               | <i>CHRAC1</i>                           | <a href="#">510942</a> | ---                                                                                                                              | 0.0001791 | 0.83        | Down       |
| chromosome 6 open reading frame 145 ortholog /// hypothetical protein LOC782137 | <i>C23H6orf145</i> /// <i>LOC782137</i> | 613986 /// 782137      | 0007154 // cell communication // inferred from electronic annotation                                                             | 0.0094924 | 0.83        | Down       |
| ribonuclease H2, subunit C                                                      | <i>RNASEH2C</i>                         | <a href="#">505618</a> | ---                                                                                                                              | 0.0071696 | 0.83        | Down       |
| hydroxymethylbilane synthase                                                    | <i>HMBS</i>                             | <a href="#">515614</a> | 0006779 // porphyrin biosynthetic process // inferred from electronic annotation /// 0006783 // heme biosynthetic process //     | 0.0040218 | 0.83        | Down       |

| Gene Title                                      | Gene Symbol      | Entrez Gene            | Putative Function                                                                                                                                                                                                                                                                 | P-value   | Fold Effect | Regulation |
|-------------------------------------------------|------------------|------------------------|-----------------------------------------------------------------------------------------------------------------------------------------------------------------------------------------------------------------------------------------------------------------------------------|-----------|-------------|------------|
|                                                 |                  |                        | inferred from electronic annotation ///<br>0033014 // tetrapyrrole biosynthetic<br>process // inferred from electronic<br>annotation                                                                                                                                              |           |             |            |
| mitochondrial ribosomal<br>protein S26          | <i>MRPS26</i>    | <a href="#">516004</a> | ---                                                                                                                                                                                                                                                                               | 0.0031196 | 0.83        | Down       |
| hypothetical protein<br>LOC613274               | <i>LOC613274</i> | <a href="#">613274</a> | ---                                                                                                                                                                                                                                                                               | 0.0027544 | 0.83        | Down       |
| nucleosome assembly protein<br>1-like 5         | <i>NAPIL5</i>    | <a href="#">508508</a> | 0006334 // nucleosome assembly //<br>inferred from electronic annotation                                                                                                                                                                                                          | 0.003815  | 0.84        | Down       |
| tetraspanin 6                                   | <i>TSPAN6</i>    | <a href="#">514741</a> | ---                                                                                                                                                                                                                                                                               | 0.0061109 | 0.84        | Down       |
| hypothetical LOC515954                          | <i>LOC515954</i> | <a href="#">515954</a> | ---                                                                                                                                                                                                                                                                               | 0.0036999 | 0.84        | Down       |
| coiled-coil domain containing<br>124            | <i>CCDC124</i>   | <a href="#">510778</a> | ---                                                                                                                                                                                                                                                                               | 0.0039946 | 0.84        | Down       |
| DnaJ (Hsp40) homolog,<br>subfamily C, member 19 | <i>DNAJC19</i>   | <a href="#">513918</a> | 0006810 // transport // inferred from<br>electronic annotation /// 0007601 // visual<br>perception // inferred from electronic<br>annotation /// 0015031 // protein transport<br>// inferred from electronic annotation ///<br>0048806 // genitalia development //<br>inferred fr | 0.0033814 | 0.84        | Down       |
| four and a half LIM domains<br>3                | <i>FHL3</i>      | <a href="#">504795</a> | ---                                                                                                                                                                                                                                                                               | 0.0099134 | 0.84        | Down       |

| Gene Title                                                   | Gene Symbol                       | Entrez Gene            | Putative Function                                                                                                                                                | P-value   | Fold Effect | Regulation |
|--------------------------------------------------------------|-----------------------------------|------------------------|------------------------------------------------------------------------------------------------------------------------------------------------------------------|-----------|-------------|------------|
| peroxisomal biogenesis factor 11 gamma                       | <i>PEX11G</i>                     | <a href="#">506518</a> | 0016559 // peroxisome fission // inferred from electronic annotation                                                                                             | 0.004637  | 0.84        | Down       |
| Zinc finger protein 22 (KOX 15)                              | <i>ZNF22</i>                      | <a href="#">768051</a> | 0006350 // transcription // inferred from electronic annotation /// 0006355 // regulation of transcription, DNA-dependent // inferred from electronic annotation | 0.0065009 | 0.85        | Down       |
| nudix (nucleoside diphosphate linked moiety X)-type motif 22 | <i>NUDT22</i>                     | <a href="#">533578</a> | ---                                                                                                                                                              | 0.0054617 | 0.85        | Down       |
| calmodulin /// calmodulin 3 (phosphorylase kinase, delta)    | <i>CALM3</i> /// <i>LOC407095</i> | 407095 /// 520277      | 0007049 // cell cycle // inferred from electronic annotation /// 0043388 // positive regulation of DNA binding // inferred from electronic annotation            | 0.0067576 | 0.85        | Down       |
| MARVEL domain containing 1                                   | <i>MARVELD1</i>                   | <a href="#">616867</a> | ---                                                                                                                                                              | 0.0027277 | 0.85        | Down       |
| hypothetical LOC537248                                       | <i>LOC537248</i>                  | <a href="#">537248</a> | ---                                                                                                                                                              | 0.006393  | 0.85        | Down       |
| tumor suppressor candidate 1                                 | <i>TUSC1</i>                      | <a href="#">539580</a> | ---                                                                                                                                                              | 0.0079432 | 0.85        | Down       |
| hexamethylene bis-acetamide inducible 2                      | <i>HEXIM2</i>                     | <a href="#">614679</a> | 0006350 // transcription // inferred from electronic annotation /// 0006355 // regulation of transcription, DNA-dependent // inferred from electronic annotation | 0.0092405 | 0.85        | Down       |

| Gene Title                                                                 | Gene Symbol      | Entrez Gene            | Putative Function                                                                                                                                                                                                                                               | P-value   | Fold Effect | Regulation |
|----------------------------------------------------------------------------|------------------|------------------------|-----------------------------------------------------------------------------------------------------------------------------------------------------------------------------------------------------------------------------------------------------------------|-----------|-------------|------------|
| hypothetical protein LOC788974                                             | <i>LOC788974</i> | <a href="#">788974</a> | ---                                                                                                                                                                                                                                                             | 0.0085347 | 0.85        | Down       |
| family with sequence similarity 32, member A                               | <i>FAM32A</i>    | <a href="#">508634</a> | ---                                                                                                                                                                                                                                                             | 0.0077942 | 0.85        | Down       |
| COMM domain containing 4                                                   | <i>COMMD4</i>    | <a href="#">616960</a> | ---                                                                                                                                                                                                                                                             | 0.0066121 | 0.85        | Down       |
| potassium channel tetramerisation domain containing 10                     | <i>KCTD10</i>    | <a href="#">540881</a> | 0006813 // potassium ion transport // inferred from electronic annotation                                                                                                                                                                                       | 0.0004138 | 0.85        | Down       |
| MID1 interacting protein 1 (gastrulation specific G12 homolog (zebrafish)) | <i>MID1IP1</i>   | <a href="#">615572</a> | ---                                                                                                                                                                                                                                                             | 0.0003568 | 0.85        | Down       |
| solute carrier family 35, member A4                                        | <i>SLC35A4</i>   | <a href="#">539354</a> | 0008643 // carbohydrate transport // inferred from electronic annotation                                                                                                                                                                                        | 0.003682  | 0.85        | Down       |
| hypothetical LOC522040                                                     | <i>MGC143117</i> | <a href="#">522040</a> | ---                                                                                                                                                                                                                                                             | 0.004216  | 0.85        | Down       |
| solute carrier family 39 (zinc transporter), member 13                     | <i>SLC39A13</i>  | <a href="#">614946</a> | 0006810 // transport // inferred from electronic annotation /// 0006811 // ion transport // inferred from electronic annotation /// 0006829 // zinc ion transport // inferred from electronic annotation /// 0030001 // metal ion transport // inferred from el | 0.0004623 | 0.85        | Down       |
| microtubule-actin crosslinking factor 1                                    | <i>MACF1</i>     | <a href="#">506730</a> | 0005975 // carbohydrate metabolic process // inferred from electronic annotation /// 0007050 // cell cycle arrest // inferred from                                                                                                                              | 0.009649  | 0.85        | Down       |

| Gene Title                                                             | Gene Symbol      | Entrez Gene            | Putative Function                                                                     | P-value   | Fold Effect | Regulation |
|------------------------------------------------------------------------|------------------|------------------------|---------------------------------------------------------------------------------------|-----------|-------------|------------|
|                                                                        |                  |                        | electronic annotation                                                                 |           |             |            |
| nitrilase 1                                                            | <i>NITI</i>      | <a href="#">504199</a> | 0006807 // nitrogen compound metabolic process // inferred from electronic annotation | 0.0025702 | 0.85        | Down       |
| similar to MAK31-like protein                                          | <i>MGC133554</i> | <a href="#">538931</a> | 0016071 // mRNA metabolic process // inferred from electronic annotation              | 0.0007782 | 0.86        | Down       |
| similar to PO-GA                                                       | <i>LOC514842</i> | <a href="#">514842</a> | ---                                                                                   | 0.005563  | 0.86        | Down       |
| cirrhosis, autosomal recessive 1A (cirhin)                             | <i>CIRH1A</i>    | <a href="#">510315</a> | ---                                                                                   | 0.0084049 | 0.86        | Down       |
| SIVA1, apoptosis-inducing factor                                       | <i>SIVA1</i>     | <a href="#">617931</a> | 0043065 // positive regulation of apoptosis // inferred from electronic annotation    | 0.006834  | 0.86        | Down       |
| amyloid beta (A4) precursor protein-binding, family B, member 1 (Fe65) | <i>APBB1</i>     | <a href="#">505096</a> | ---                                                                                   | 0.0097578 | 0.86        | Down       |
| WD repeat domain 74                                                    | <i>WDR74</i>     | <a href="#">505875</a> | ---                                                                                   | 0.0029228 | 0.86        | Down       |
| WW domain binding protein 1                                            | <i>WBPI</i>      | <a href="#">509188</a> | ---                                                                                   | 0.0010626 | 0.86        | Down       |
| Josephin domain containing 1                                           | <i>JOSD1</i>     | <a href="#">510781</a> | ---                                                                                   | 0.0023964 | 0.86        | Down       |
| glutathione S-transferase pi                                           | <i>GSTP1</i>     | <a href="#">281806</a> | 0008152 // metabolic process // inferred from electronic annotation                   | 0.0042726 | 0.86        | Down       |
| nudix (nucleoside diphosphate                                          | <i>NUDT3</i>     | <a href="#">618855</a> | ---                                                                                   | 0.0037449 | 0.86        | Down       |

| Gene Title                                   | Gene Symbol       | Entrez Gene            | Putative Function                                                                                                                                                                                                                      | P-value   | Fold Effect | Regulation |
|----------------------------------------------|-------------------|------------------------|----------------------------------------------------------------------------------------------------------------------------------------------------------------------------------------------------------------------------------------|-----------|-------------|------------|
| linked moiety X)-type motif 3                |                   |                        |                                                                                                                                                                                                                                        |           |             |            |
| SEC14-like 1 ( <i>S. cerevisiae</i> )        | <i>SEC14L1</i>    | <a href="#">513449</a> | 0006418 // tRNA aminoacylation for protein translation // inferred from electronic annotation /// 0006810 // transport // inferred from electronic annotation                                                                          | 0.0064129 | 0.86        | Down       |
| RAB11 family interacting protein 5 (class I) | <i>RAB11FIP5</i>  | <a href="#">535992</a> | 0008152 // metabolic process // inferred from electronic annotation                                                                                                                                                                    | 0.0099549 | 0.86        | Down       |
| Chromosome 3 open reading frame 60 ortholog  | <i>C22H3orf60</i> | <a href="#">511968</a> | ---                                                                                                                                                                                                                                    | 0.0043558 | 0.87        | Down       |
| BTB (POZ) domain containing 10               | <i>BTBD10</i>     | <a href="#">505888</a> | 0006813 // potassium ion transport // inferred from electronic annotation                                                                                                                                                              | 0.0028593 | 0.87        | Down       |
| mediator complex subunit 18                  | <i>MED18</i>      | <a href="#">540695</a> | 0006350 // transcription // inferred from electronic annotation /// 0006355 // regulation of transcription, DNA-dependent // inferred from electronic annotation                                                                       | 0.0019681 | 0.87        | Down       |
| transaldolase 1                              | <i>TALDO1</i>     | <a href="#">513453</a> | 0005975 // carbohydrate metabolic process // inferred from electronic annotation /// 0006098 // pentose-phosphate shunt // inferred from electronic annotation /// 0008152 // metabolic process // inferred from electronic annotation | 0.0021399 | 0.87        | Down       |
| transaldolase 1                              | <i>TALDO1</i>     | <a href="#">513453</a> | 0005975 // carbohydrate metabolic process // inferred from electronic annotation ///                                                                                                                                                   | 0.0021399 | 0.87        | Down       |

| Gene Title                                                                  | Gene Symbol       | Entrez Gene            | Putative Function                                                                                                                                                                                                                                       | P-value   | Fold Effect | Regulation |
|-----------------------------------------------------------------------------|-------------------|------------------------|---------------------------------------------------------------------------------------------------------------------------------------------------------------------------------------------------------------------------------------------------------|-----------|-------------|------------|
|                                                                             |                   |                        | 0006098 // pentose-phosphate shunt // inferred from electronic annotation ///<br>0008152 // metabolic process // inferred from electronic annotation                                                                                                    |           |             |            |
| nuclear protein localization 4 homolog ( <i>S. cerevisiae</i> )             | <i>NPLOC4</i>     | <a href="#">508519</a> | ---                                                                                                                                                                                                                                                     | 0.0084807 | 0.87        | Down       |
| COP9 constitutive photomorphogenic homolog subunit 6 ( <i>Arabidopsis</i> ) | <i>COPS6</i>      | <a href="#">512756</a> | ---                                                                                                                                                                                                                                                     | 0.0033381 | 0.87        | Down       |
| flotillin 1                                                                 | <i>FLOT1</i>      | <a href="#">532573</a> | ---                                                                                                                                                                                                                                                     | 0.0050366 | 0.87        | Down       |
| elaC homolog 1 ( <i>E. coli</i> )                                           | <i>ELAC1</i>      | <a href="#">532568</a> | 0008033 // tRNA processing // inferred from electronic annotation                                                                                                                                                                                       | 0.0031362 | 0.87        | Down       |
| clathrin, light polypeptide B (light chain B)                               | <i>CLTLB</i>      | <a href="#">281698</a> | 0006461 // protein complex assembly // inferred from electronic annotation ///<br>0006886 // intracellular protein transport // inferred from electronic annotation ///<br>0016192 // vesicle-mediated transport // inferred from electronic annotation | 0.0058922 | 0.87        | Down       |
| eukaryotic translation initiation factor 6                                  | <i>EIF6</i>       | <a href="#">286811</a> | 0006412 // translation // inferred from electronic annotation /// 0042256 // mature ribosome assembly // inferred from electronic annotation                                                                                                            | 0.006876  | 0.87        | Down       |
| chromosome 19 open reading frame 60 ortholog                                | <i>C7H19orf60</i> | <a href="#">511085</a> | ---                                                                                                                                                                                                                                                     | 0.0009588 | 0.87        | Down       |



| Gene Title                                                 | Gene Symbol        | Entrez Gene            | Putative Function                                                                                                                                                                                                                                               | P-value   | Fold Effect | Regulation |
|------------------------------------------------------------|--------------------|------------------------|-----------------------------------------------------------------------------------------------------------------------------------------------------------------------------------------------------------------------------------------------------------------|-----------|-------------|------------|
| ADP-ribosylation factor interacting protein 2 (arfaptin 2) | <i>ARFIP2</i>      | <a href="#">514938</a> | 0030036 // actin cytoskeleton organization and biogenesis // inferred from electronic annotation                                                                                                                                                                | 0.0009393 | 0.88        | Down       |
| NDRG family member 3                                       | <i>NDRG3</i>       | <a href="#">514399</a> | ---                                                                                                                                                                                                                                                             | 0.0006719 | 0.88        | Down       |
| suppressor of Ty 4 homolog 1 ( <i>S. cerevisiae</i> )      | <i>SUPT4H1</i>     | <a href="#">616425</a> | 0000122 // negative regulation of transcription from RNA polymerase II promoter // inferred from electronic annotation /// 0006350 // transcription // inferred from electronic annotation /// 0006355 // regulation of transcription, DNA-dependent // inferre | 0.0094645 | 0.88        | Down       |
| chromosome 3 open reading frame 10 ortholog                | <i>C22H3ORF10</i>  | <a href="#">540092</a> | ---                                                                                                                                                                                                                                                             | 0.007623  | 0.88        | Down       |
| copper metabolism (Murr1) domain containing 1              | <i>COMMD1</i>      | <a href="#">534683</a> | ---                                                                                                                                                                                                                                                             | 0.0072733 | 0.88        | Down       |
| chromosome 16 open reading frame 75 ortholog               | <i>C25H16ORF75</i> | <a href="#">615553</a> | ---                                                                                                                                                                                                                                                             | 0.0099042 | 0.88        | Down       |
| family with sequence similarity 125, member A              | <i>FAM125A</i>     | <a href="#">507199</a> | ---                                                                                                                                                                                                                                                             | 0.0069884 | 0.88        | Down       |
| small nuclear ribonucleoprotein polypeptide N              | <i>SNRPN</i>       | <a href="#">780877</a> | 0016071 // mRNA metabolic process // inferred from electronic annotation                                                                                                                                                                                        | 0.0066329 | 0.88        | Down       |
| peptidylprolyl isomerase                                   | <i>PPIL1</i>       | <a href="#">508179</a> | 0006397 // mRNA processing // inferred from electronic annotation /// 0006457 //                                                                                                                                                                                | 0.0028891 | 0.89        | Down       |

| Gene Title                                                                                             | Gene Symbol      | Entrez Gene            | Putative Function                                                                                                                                                                                                                                               | P-value   | Fold Effect | Regulation |
|--------------------------------------------------------------------------------------------------------|------------------|------------------------|-----------------------------------------------------------------------------------------------------------------------------------------------------------------------------------------------------------------------------------------------------------------|-----------|-------------|------------|
| (cyclophilin)-like 1                                                                                   |                  |                        | protein folding // inferred from electronic annotation /// 0008380 // RNA splicing // inferred from electronic annotation                                                                                                                                       |           |             |            |
| HCLS1 associated protein X-1                                                                           | <i>HAX1</i>      | <a href="#">506895</a> | ---                                                                                                                                                                                                                                                             | 0.0064032 | 0.89        | Down       |
| myeloid/lymphoid or mixed-lineage leukemia (trithorax homolog, <i>Drosophila</i> ); translocated to, 1 | <i>MLLT1</i>     | <a href="#">504458</a> | 0006355 // regulation of transcription, DNA-dependent // inferred from electronic annotation                                                                                                                                                                    | 0.0090453 | 0.89        | Down       |
| RGP1 retrograde golgi transport homolog ( <i>S. cerevisiae</i> )                                       | <i>RGP1</i>      | <a href="#">539393</a> | ---                                                                                                                                                                                                                                                             | 0.0014906 | 0.89        | Down       |
| presenilin enhancer 2 homolog ( <i>C. elegans</i> )                                                    | <i>PSENE2</i>    | <a href="#">493993</a> | 0006509 // membrane protein ectodomain proteolysis // inferred from electronic annotation /// 0007219 // Notch signaling pathway // inferred from electronic annotation /// 0016485 // protein processing // inferred from electronic annotation /// 0043085 // | 0.0035875 | 0.89        | Down       |
| CDC42 effector protein (Rho GTPase binding) 4                                                          | <i>CDC42EP4</i>  | <a href="#">540152</a> | ---                                                                                                                                                                                                                                                             | 0.0018496 | 0.89        | Down       |
| hypothetical LOC506622                                                                                 | <i>MGC138908</i> | <a href="#">506622</a> | ---                                                                                                                                                                                                                                                             | 0.0060929 | 0.89        | Down       |
| COMM domain containing 5                                                                               | <i>COMMD5</i>    | <a href="#">504807</a> | ---                                                                                                                                                                                                                                                             | 0.0096013 | 0.89        | Down       |
| similar to                                                                                             | <i>LOC616324</i> | <a href="#">616324</a> | ---                                                                                                                                                                                                                                                             | 0.0062124 | 0.89        | Down       |

| Gene Title                                                                          | Gene Symbol        | Entrez Gene            | Putative Function                                                                                                                     | P-value   | Fold Effect | Regulation |
|-------------------------------------------------------------------------------------|--------------------|------------------------|---------------------------------------------------------------------------------------------------------------------------------------|-----------|-------------|------------|
| OTTHUMP00000022229                                                                  |                    |                        |                                                                                                                                       |           |             |            |
| NADH dehydrogenase (ubiquinone) 1 beta subcomplex, 10, 22kDa                        | <i>NDUFB10</i>     | <a href="#">327701</a> | 0006810 // transport // inferred from electronic annotation /// 0055114 // oxidation reduction // inferred from electronic annotation | 0.0011604 | 0.89        | Down       |
| nuclear factor of kappa light polypeptide gene enhancer in B-cells inhibitor-like 1 | <i>NFKBIL1</i>     | <a href="#">514369</a> | ---                                                                                                                                   | 0.004722  | 0.90        | Down       |
| ribose 5-phosphate isomerase A (ribose 5-phosphate epimerase)                       | <i>RPIA</i>        | <a href="#">613376</a> | 0009052 // pentose-phosphate shunt, non-oxidative branch // inferred from electronic annotation                                       | 0.0080445 | 0.90        | Down       |
| hypothetical protein LOC777786                                                      | <i>LOC777786</i>   | <a href="#">777786</a> | ---                                                                                                                                   | 0.0078997 | 0.90        | Down       |
| mitochondrial NADH:ubiquinone oxidoreductase ESSS subunit                           | <i>ESSS</i>        | <a href="#">404161</a> | 0006810 // transport // inferred from electronic annotation /// 0055114 // oxidation reduction // inferred from electronic annotation | 0.0092196 | 0.90        | Down       |
| synovial sarcoma translocation gene on chromosome 18-like 2                         | <i>SS18L2</i>      | <a href="#">618689</a> | ---                                                                                                                                   | 0.0039869 | 0.90        | Down       |
| transmembrane protein 185A                                                          | <i>TMEM185A</i>    | <a href="#">526189</a> | ---                                                                                                                                   | 0.004727  | 0.90        | Down       |
| chromosome 17 open reading frame 81 ortholog                                        | <i>C19H17ORF81</i> | <a href="#">512976</a> | ---                                                                                                                                   | 0.0021741 | 0.90        | Down       |

| Gene Title                                                                                    | Gene Symbol                        | Entrez Gene            | Putative Function                                                                                                                                                                                                                                                                 | P-value   | Fold Effect | Regulation |
|-----------------------------------------------------------------------------------------------|------------------------------------|------------------------|-----------------------------------------------------------------------------------------------------------------------------------------------------------------------------------------------------------------------------------------------------------------------------------|-----------|-------------|------------|
| deoxynucleotidyltransferase, terminal, interacting protein 1                                  | <i>DNTTIP1</i>                     | <a href="#">505524</a> | ---                                                                                                                                                                                                                                                                               | 0.0056551 | 0.90        | Down       |
| PDZ and LIM domain 4                                                                          | <i>PDLIM4</i>                      | <a href="#">515410</a> | ---                                                                                                                                                                                                                                                                               | 0.0099966 | 0.90        | Down       |
| Hypothetical LOC507045                                                                        | <i>LOC507045</i>                   | <a href="#">507045</a> | ---                                                                                                                                                                                                                                                                               | 0.0038383 | 0.91        | Down       |
| canopy 2 homolog (zebrafish)                                                                  | <i>CNPY2</i>                       | <a href="#">506534</a> | ---                                                                                                                                                                                                                                                                               | 0.007249  | 0.91        | Down       |
| archaelysin family metalloproteinase 2                                                        | <i>AMZ2</i>                        | <a href="#">515126</a> | ---                                                                                                                                                                                                                                                                               | 0.0074735 | 0.91        | Down       |
| protein disulfide isomerase family A, member 2 /// Rho GDP dissociation inhibitor (GDI) gamma | <i>ARHGDIG</i> ///<br><i>PDIA2</i> | 504356 ///<br>613745   | 0045454 // cell redox homeostasis //<br>inferred from electronic annotation                                                                                                                                                                                                       | 0.0073757 | 0.91        | Down       |
| neural precursor cell expressed, developmentally down-regulated 8                             | <i>NEDD8</i>                       | <a href="#">286796</a> | 0000723 // telomere maintenance //<br>inferred from electronic annotation ///<br>0006357 // regulation of transcription from<br>RNA polymerase II promoter // inferred<br>from sequence or structural similarity ///<br>0006464 // protein modification process //<br>inferred fr | 0.0075676 | 0.91        | Down       |
| exosome component 1                                                                           | <i>EXOSC1</i>                      | <a href="#">506018</a> | ---                                                                                                                                                                                                                                                                               | 0.0092675 | 0.91        | Down       |
| cerebrum and skeletal muscle specific transcript 1                                            | <i>LOC618598</i>                   | <a href="#">618598</a> | ---                                                                                                                                                                                                                                                                               | 0.0065798 | 0.91        | Down       |
| RNA binding motif protein                                                                     | <i>RBM15B</i>                      | <a href="#">508868</a> | 0045449 // regulation of transcription //                                                                                                                                                                                                                                         | 0.0004059 | 0.91        | Down       |

| Gene Title                                                         | Gene Symbol      | Entrez Gene            | Putative Function                                                                                                                                                                                                                                               | P-value   | Fold Effect | Regulation |
|--------------------------------------------------------------------|------------------|------------------------|-----------------------------------------------------------------------------------------------------------------------------------------------------------------------------------------------------------------------------------------------------------------|-----------|-------------|------------|
| 15B                                                                |                  |                        | inferred from electronic annotation                                                                                                                                                                                                                             |           |             |            |
| ATPase, H <sup>+</sup> transporting, lysosomal 14kDa, V1 subunit F | <i>ATP6V1F</i>   | <a href="#">282405</a> | 0006810 // transport // inferred from electronic annotation /// 0006811 // ion transport // inferred from electronic annotation /// 0015986 // ATP synthesis coupled proton transport // inferred from electronic annotation /// 0015992 // proton transport // | 0.0098168 | 0.91        | Down       |
| emerin (Emery-Dreifuss muscular dystrophy)                         | <i>EMD</i>       | <a href="#">399681</a> | ---                                                                                                                                                                                                                                                             | 0.0092171 | 0.91        | Down       |
| DnaJ (Hsp40) homolog, subfamily C, member 8                        | <i>DNAJC8</i>    | <a href="#">614259</a> | ---                                                                                                                                                                                                                                                             | 0.0074882 | 0.91        | Down       |
| TRM112-like                                                        | <i>TRM112L</i>   | <a href="#">507833</a> | ---                                                                                                                                                                                                                                                             | 0.0050655 | 0.92        | Down       |
| small nuclear RNA activating complex, polypeptide 2, 45kDa         | <i>SNAPC2</i>    | <a href="#">516078</a> | ---                                                                                                                                                                                                                                                             | 0.0008313 | 0.92        | Down       |
| lactate dehydrogenase B                                            | <i>LDHB</i>      | <a href="#">281275</a> | 0005975 // carbohydrate metabolic process // inferred from electronic annotation /// 0006096 // glycolysis // inferred from electronic annotation /// 0008152 // metabolic process // inferred from electronic annotation /// 0019642 // anaerobic glycolysis / | 0.0014626 | 0.92        | Down       |
| similar to leucine-rich-domain inter-acting protein 1; LeR         | <i>LOC515042</i> | <a href="#">515042</a> | 0006355 // regulation of transcription, DNA-dependent // inferred from electronic                                                                                                                                                                               | 0.0083649 | 0.94        | Down       |

| <b>Gene Title</b>                                                                                  | <b>Gene Symbol</b> | <b>Entrez Gene</b>     | <b>Putative Function</b>                                                                                                                                                                                                                                        | <b>P-value</b> | <b>Fold Effect</b> | <b>Regulation</b> |
|----------------------------------------------------------------------------------------------------|--------------------|------------------------|-----------------------------------------------------------------------------------------------------------------------------------------------------------------------------------------------------------------------------------------------------------------|----------------|--------------------|-------------------|
| inter-acting protein 1; LEAP1                                                                      |                    |                        | annotation                                                                                                                                                                                                                                                      |                |                    |                   |
| similar to Serine/arginine repetitive matrix protein 2                                             | <i>LOC534002</i>   | <a href="#">534002</a> | ---                                                                                                                                                                                                                                                             | 0.0067539      | 1.09               | Up                |
| adaptor-related protein complex 3, delta 1 subunit                                                 | <i>AP3D1</i>       | <a href="#">281023</a> | 0006461 // protein complex assembly // inferred from electronic annotation /// 0006810 // transport // inferred from electronic annotation /// 0006886 // intracellular protein transport // inferred from electronic annotation /// 0015031 // protein transpo | 0.0067291      | 1.09               | Up                |
| suppression of tumorigenicity 13 (colon carcinoma) (Hsp70 interacting protein)                     | <i>ST13</i>        | <a href="#">510494</a> | 0006950 // response to stress // inferred from electronic annotation                                                                                                                                                                                            | 0.0003793      | 1.09               | Up                |
| similar to LBP-1a=transcription factor binding to initiation site of HIV-1 {alternatively spliced} | <i>LOC785419</i>   | <a href="#">785419</a> | ---                                                                                                                                                                                                                                                             | 0.0069641      | 1.09               | Up                |
| ariadne homolog, ubiquitin-conjugating enzyme E2 binding protein, 1 (Drosophila)                   | <i>ARIH1</i>       | <a href="#">508410</a> | 0006512 // ubiquitin cycle // inferred from electronic annotation                                                                                                                                                                                               | 0.0037756      | 1.09               | Up                |
| pumilio homolog 2 (Drosophila)                                                                     | <i>PUM2</i>        | <a href="#">540170</a> | ---                                                                                                                                                                                                                                                             | 0.0035776      | 1.09               | Up                |
| ubiquitin specific peptidase like 1                                                                | <i>USPL1</i>       | <a href="#">788351</a> | 0006418 // tRNA aminoacylation for protein translation // inferred from                                                                                                                                                                                         | 0.0060813      | 1.10               | Up                |

| Gene Title                                                          | Gene Symbol      | Entrez Gene            | Putative Function                                                                                                                                                                                                                                   | P-value   | Fold Effect | Regulation |
|---------------------------------------------------------------------|------------------|------------------------|-----------------------------------------------------------------------------------------------------------------------------------------------------------------------------------------------------------------------------------------------------|-----------|-------------|------------|
|                                                                     |                  |                        | electronic annotation                                                                                                                                                                                                                               |           |             |            |
| zinc finger, FYVE domain containing 26                              | <i>ZFYVE26</i>   | <a href="#">514402</a> | ---                                                                                                                                                                                                                                                 | 0.0038088 | 1.10        | Up         |
| lipin 3                                                             | <i>LPIN3</i>     | <a href="#">521637</a> | ---                                                                                                                                                                                                                                                 | 0.0064708 | 1.10        | Up         |
| eukaryotic translation initiation factor 4E nuclear import factor 1 | <i>EIF4ENIF1</i> | <a href="#">514108</a> | ---                                                                                                                                                                                                                                                 | 0.0046419 | 1.10        | Up         |
| R3H domain containing 2                                             | <i>R3HDM2</i>    | <a href="#">613499</a> | ---                                                                                                                                                                                                                                                 | 0.0067453 | 1.11        | Up         |
| NEDD4 binding protein 2-like 2                                      | <i>N4BP2L2</i>   | <a href="#">541201</a> | ---                                                                                                                                                                                                                                                 | 0.0005451 | 1.11        | Up         |
| similar to KIAA0753                                                 | <i>LOC512933</i> | <a href="#">512933</a> | ---                                                                                                                                                                                                                                                 | 0.0065387 | 1.12        | Up         |
| fragile X mental retardation, autosomal homolog 1                   | <i>FXR1</i>      | <a href="#">536793</a> | 0007275 // multicellular organismal development // inferred from electronic annotation /// 0007519 // skeletal muscle development // inferred from electronic annotation /// 0030154 // cell differentiation // inferred from electronic annotation | 0.003359  | 1.13        | Up         |
| Outer dense fiber of sperm tails 2                                  | <i>ODF2</i>      | <a href="#">539043</a> | 0007275 // multicellular organismal development // inferred from electronic annotation /// 0007283 // spermatogenesis // inferred from electronic annotation /// 0030154 // cell differentiation // inferred from electronic annotation             | 0.0045919 | 1.13        | Up         |

| Gene Title                                                                   | Gene Symbol     | Entrez Gene            | Putative Function                                                                                                                                                                                          | P-value   | Fold Effect | Regulation |
|------------------------------------------------------------------------------|-----------------|------------------------|------------------------------------------------------------------------------------------------------------------------------------------------------------------------------------------------------------|-----------|-------------|------------|
| ATPase, Ca <sup>++</sup> transporting, cardiac muscle, slow twitch 2         | <i>ATP2A2</i>   | <a href="#">540568</a> | 0006810 // transport // inferred from electronic annotation /// 0006812 // cation transport // inferred from electronic annotation /// 0008152 // metabolic process // inferred from electronic annotation | 0.0059845 | 1.13        | Up         |
| heat shock 70kDa protein 4                                                   | <i>HSPA4</i>    | <a href="#">536558</a> | ---                                                                                                                                                                                                        | 0.0056599 | 1.14        | Up         |
| protein-L-isoaspartate (D-aspartate) O-methyltransferase domain containing 2 | <i>PCMTD2</i>   | <a href="#">505807</a> | 0006464 // protein modification process // inferred from electronic annotation                                                                                                                             | 0.0013967 | 1.14        | Up         |
| Bardet-Biedl syndrome 4                                                      | <i>BBS4</i>     | <a href="#">532120</a> | 0051297 // centrosome organization and biogenesis // inferred from sequence or structural similarity                                                                                                       | 0.0039836 | 1.15        | Up         |
| transmembrane protein 167                                                    | <i>TMEM167</i>  | <a href="#">613669</a> | ---                                                                                                                                                                                                        | 0.0081252 | 1.15        | Up         |
| Fc fragment of IgG, receptor, transporter, alpha                             | <i>FCGRT</i>    | <a href="#">338062</a> | 0006955 // immune response // inferred from electronic annotation /// 0019882 // antigen processing and presentation // inferred from electronic annotation                                                | 0.0099525 | 1.16        | Up         |
| Rho guanine nucleotide exchange factor (GEF) 11                              | <i>ARHGEF11</i> | <a href="#">511220</a> | 0007242 // intracellular signaling cascade // inferred from electronic annotation /// 0035023 // regulation of Rho protein signal transduction // inferred from electronic annotation                      | 0.0063696 | 1.16        | Up         |
| DnaJ (Hsp40) homolog,                                                        | <i>DNAJB6</i>   | <a href="#">282215</a> | 0006457 // protein folding // inferred from                                                                                                                                                                | 0.0044137 | 1.17        | Up         |



| Gene Title                                                                                                                                                                       | Gene Symbol      | Entrez Gene            | Putative Function                                                                                                                                                                                           | P-value   | Fold Effect | Regulation |
|----------------------------------------------------------------------------------------------------------------------------------------------------------------------------------|------------------|------------------------|-------------------------------------------------------------------------------------------------------------------------------------------------------------------------------------------------------------|-----------|-------------|------------|
| subfamily B, member 6                                                                                                                                                            |                  |                        | electronic annotation                                                                                                                                                                                       |           |             |            |
| Alstrom syndrome 1                                                                                                                                                               | <i>ALMS1</i>     | <a href="#">533055</a> | ---                                                                                                                                                                                                         | 0.003775  | 1.17        | Up         |
| eukaryotic translation initiation factor 2C, 3                                                                                                                                   | <i>EIF2C3</i>    | <a href="#">406231</a> | ---                                                                                                                                                                                                         | 0.0076284 | 1.17        | Up         |
| SH3 domain containing, Ysc84-like 1 ( <i>S. cerevisiae</i> )                                                                                                                     | <i>SH3YLI</i>    | <a href="#">534337</a> | ---                                                                                                                                                                                                         | 0.006273  | 1.17        | Up         |
| Similar to Nesprin-2 (Nuclear envelope spectrin repeat protein 2) (Syne-2) (Synaptic nuclear envelope protein 2) (Nucleus and actin connecting element protein) (Protein NUANCE) | <i>LOC540504</i> | <a href="#">540504</a> | ---                                                                                                                                                                                                         | 0.0074571 | 1.18        | Up         |
| A kinase (PRKA) anchor protein (yotiao) 9                                                                                                                                        | <i>AKAP9</i>     | <a href="#">520784</a> | 0008152 // metabolic process // inferred from electronic annotation                                                                                                                                         | 0.0029126 | 1.18        | Up         |
| centrosome and spindle pole associated protein 1                                                                                                                                 | <i>CSPP1</i>     | <a href="#">524180</a> | ---                                                                                                                                                                                                         | 0.0060966 | 1.19        | Up         |
| kinase insert domain receptor (a type III receptor tyrosine kinase)                                                                                                              | <i>KDR</i>       | <a href="#">407170</a> | 0006468 // protein amino acid phosphorylation // inferred from electronic annotation /// 0007169 // transmembrane receptor protein tyrosine kinase signaling pathway // inferred from electronic annotation | 0.0084445 | 1.19        | Up         |
| similar to carboxypeptidase D                                                                                                                                                    | <i>LOC532189</i> | <a href="#">532189</a> | ---                                                                                                                                                                                                         | 0.0002176 | 1.19        | Up         |

| Gene Title                                                                   | Gene Symbol                           | Entrez Gene            | Putative Function                                                                                                                                                | P-value   | Fold Effect | Regulation |
|------------------------------------------------------------------------------|---------------------------------------|------------------------|------------------------------------------------------------------------------------------------------------------------------------------------------------------|-----------|-------------|------------|
| Bardet-Biedl syndrome 5                                                      | <i>BBS5</i>                           | <a href="#">528191</a> | ---                                                                                                                                                              | 0.008851  | 1.19        | Up         |
| pericentriolar material 1                                                    | <i>PCM1</i>                           | <a href="#">525337</a> | ---                                                                                                                                                              | 0.0071336 | 1.19        | Up         |
| NEDD4 binding protein 2-like 1                                               | <i>N4BP2L1</i>                        | <a href="#">616069</a> | ---                                                                                                                                                              | 0.0050615 | 1.20        | Up         |
| GRAM domain containing 1C                                                    | <i>GRAMD1C</i>                        | <a href="#">505581</a> | ---                                                                                                                                                              | 0.0033702 | 1.20        | Up         |
| ganglioside induced differentiation associated protein 2                     | <i>GDAP2</i>                          | <a href="#">508774</a> | ---                                                                                                                                                              | 0.0038183 | 1.20        | Up         |
| transmembrane 4 L six family member 1                                        | <i>TM4SF1</i>                         | <a href="#">533038</a> | ---                                                                                                                                                              | 0.0091551 | 1.21        | Up         |
| eukaryotic translation initiation factor 2C, 2 /// similar to EIF2C2 protein | <i>EIF2C2</i> ///<br><i>LOC618754</i> | 404130 ///<br>618754   | 0006412 // translation // inferred from electronic annotation /// 0031047 // gene silencing by RNA // inferred from electronic annotation                        | 0.002324  | 1.22        | Up         |
| eukaryotic translation initiation factor 2C, 2 /// similar to EIF2C2 protein | <i>EIF2C2</i> ///<br><i>LOC618754</i> | 404130 ///<br>618754   | 0006412 // translation // inferred from electronic annotation /// 0031047 // gene silencing by RNA // inferred from electronic annotation                        | 0.002324  | 1.22        | Up         |
| Mediator complex subunit 25                                                  | <i>MED25</i>                          | <a href="#">533865</a> | 0006350 // transcription // inferred from electronic annotation /// 0006355 // regulation of transcription, DNA-dependent // inferred from electronic annotation | 0.0085425 | 1.22        | Up         |

| Gene Title                                                                         | Gene Symbol      | Entrez Gene            | Putative Function                                                                                                                                                | P-value   | Fold Effect | Regulation |
|------------------------------------------------------------------------------------|------------------|------------------------|------------------------------------------------------------------------------------------------------------------------------------------------------------------|-----------|-------------|------------|
| WNK lysine deficient protein kinase 1                                              | <i>WNK1</i>      | <a href="#">506433</a> | ---                                                                                                                                                              | 0.0001584 | 1.22        | Up         |
| similar to Signal peptide peptidase-like 2A                                        | <i>LOC530325</i> | <a href="#">530325</a> | ---                                                                                                                                                              | 0.006624  | 1.22        | Up         |
| solute carrier family 1 (neutral amino acid transporter), member 5                 | <i>SLCIA5</i>    | <a href="#">282355</a> | 0006810 // transport // inferred from electronic annotation /// 0006835 // dicarboxylic acid transport // inferred from electronic annotation                    | 0.0084736 | 1.22        | Up         |
| human immunodeficiency virus type I enhancer binding protein 1                     | <i>HIVEP1</i>    | <a href="#">529115</a> | ---                                                                                                                                                              | 0.0084901 | 1.22        | Up         |
| Zinc finger, DHHC-type containing 23                                               | <i>ZDHHC23</i>   | <a href="#">512177</a> | ---                                                                                                                                                              | 0.006518  | 1.22        | Up         |
| zinc finger protein 192                                                            | <i>ZNF192</i>    | <a href="#">511794</a> | 0006350 // transcription // inferred from electronic annotation /// 0006355 // regulation of transcription, DNA-dependent // inferred from electronic annotation | 0.0078616 | 1.23        | Up         |
| Rabaptin, RAB GTPase binding effector protein 2                                    | <i>RABEP2</i>    | <a href="#">511736</a> | ---                                                                                                                                                              | 0.0023603 | 1.23        | Up         |
| nuclear factor of kappa light polypeptide gene enhancer in B-cells inhibitor, zeta | <i>NFKBIZ</i>    | <a href="#">282713</a> | 0006350 // transcription // inferred from electronic annotation /// 0006355 // regulation of transcription, DNA-dependent // inferred from electronic            | 0.0035535 | 1.23        | Up         |

| Gene Title                                                               | Gene Symbol                        | Entrez Gene            | Putative Function                                                                                                                                                                                                                                                | P-value   | Fold Effect | Regulation |
|--------------------------------------------------------------------------|------------------------------------|------------------------|------------------------------------------------------------------------------------------------------------------------------------------------------------------------------------------------------------------------------------------------------------------|-----------|-------------|------------|
|                                                                          |                                    |                        | annotation                                                                                                                                                                                                                                                       |           |             |            |
| neuroplastin                                                             | <i>NPTN</i>                        | <a href="#">540039</a> | ---                                                                                                                                                                                                                                                              | 0.0035179 | 1.24        | Up         |
| similar to SEC14 and spectrin domains 1 /// SEC14 and spectrin domains 1 | <i>LOC512176</i> /// <i>SESTD1</i> | 512176 /// 789054      | ---                                                                                                                                                                                                                                                              | 0.0075638 | 1.24        | Up         |
| dihydrofolate reductase                                                  | <i>DHFR</i>                        | <a href="#">508809</a> | 0006545 // glycine biosynthetic process // inferred from electronic annotation /// 0006730 // one-carbon compound metabolic process // inferred from electronic annotation /// 0009165 // nucleotide biosynthetic process // inferred from electronic annotation | 0.0084086 | 1.25        | Up         |
| eukaryotic translation initiation factor 2-alpha kinase 3                | <i>EIF2AK3</i>                     | <a href="#">535820</a> | 0006468 // protein amino acid phosphorylation // inferred from electronic annotation                                                                                                                                                                             | 0.0025297 | 1.25        | Up         |
| Poly(A) polymerase gamma                                                 | <i>PAPOLG</i>                      | <a href="#">529071</a> | 0006350 // transcription // inferred from electronic annotation /// 0031123 // RNA 3'-end processing // inferred from electronic annotation /// 0043631 // RNA polyadenylation // inferred from electronic annotation                                            | 0.0017401 | 1.26        | Up         |
| suppressor of cytokine signaling 2                                       | <i>SOCS2</i>                       | <a href="#">338437</a> | 0001558 // regulation of cell growth // inferred from electronic annotation /// 0006512 // ubiquitin cycle // inferred from electronic annotation /// 0007242 // intracellular signaling cascade // inferred                                                     | 0.0043459 | 1.26        | Up         |

| Gene Title                                                  | Gene Symbol      | Entrez Gene            | Putative Function                                                                                                                                                                     | P-value   | Fold Effect | Regulation |
|-------------------------------------------------------------|------------------|------------------------|---------------------------------------------------------------------------------------------------------------------------------------------------------------------------------------|-----------|-------------|------------|
|                                                             |                  |                        | from electronic annotation /// 0009968 // negative                                                                                                                                    |           |             |            |
| Similar to sperm associated antigen 1                       | <i>LOC530104</i> | <a href="#">530104</a> | ---                                                                                                                                                                                   | 0.0031703 | 1.26        | Up         |
| kinesin family member 27                                    | <i>KIF27</i>     | <a href="#">536335</a> | ---                                                                                                                                                                                   | 0.0064639 | 1.27        | Up         |
| Rho-guanine nucleotide exchange factor                      | <i>LOC616969</i> | <a href="#">616969</a> | 0007242 // intracellular signaling cascade // inferred from electronic annotation /// 0035023 // regulation of Rho protein signal transduction // inferred from electronic annotation | 0.0082533 | 1.27        | Up         |
| Ubiquitin fusion degradation 1 like                         | <i>UFD1L</i>     | <a href="#">507124</a> | 0006511 // ubiquitin-dependent protein catabolic process // inferred from electronic annotation                                                                                       | 0.0042013 | 1.28        | Up         |
| Transmembrane BAX inhibitor motif containing 4              | <i>TMBIM4</i>    | <a href="#">513242</a> | ---                                                                                                                                                                                   | 0.0010393 | 1.28        | Up         |
| serine/threonine protein kinase MST4                        | <i>MST4</i>      | <a href="#">539445</a> | 0006468 // protein amino acid phosphorylation // inferred from electronic annotation                                                                                                  | 0.0030619 | 1.30        | Up         |
| eukaryotic translation initiation factor 4E family member 3 | <i>EIF4E3</i>    | <a href="#">616906</a> | 0006412 // translation // inferred from electronic annotation /// 0006413 // translational initiation // inferred from electronic annotation                                          | 0.0098587 | 1.32        | Up         |
| similar to carnitine O-palmitoyltransferase                 | <i>LOC506812</i> | <a href="#">506812</a> | ---                                                                                                                                                                                   | 0.0017725 | 1.34        | Up         |

| Gene Title                                                                | Gene Symbol    | Entrez Gene            | Putative Function                                                                                                                                                                                                                                               | P-value   | Fold Effect | Regulation |
|---------------------------------------------------------------------------|----------------|------------------------|-----------------------------------------------------------------------------------------------------------------------------------------------------------------------------------------------------------------------------------------------------------------|-----------|-------------|------------|
| SLAIN motif family, member 2                                              | <i>SLAIN2</i>  | <a href="#">534203</a> | ---                                                                                                                                                                                                                                                             | 0.0067929 | 1.36        | Up         |
| angiopoietin-like 4                                                       | <i>ANGPTL4</i> | <a href="#">509963</a> | 0001525 // angiogenesis // inferred from electronic annotation /// 0007165 // signal transduction // inferred from electronic annotation /// 0007275 // multicellular organismal development // inferred from electronic annotation /// 0030154 // cell differe | 0.0090494 | 1.37        | Up         |
| PAN3 polyA specific ribonuclease subunit homolog ( <i>S. cerevisiae</i> ) | <i>PAN3</i>    | <a href="#">519743</a> | 0006468 // protein amino acid phosphorylation // inferred from electronic annotation                                                                                                                                                                            | 0.0042416 | 1.38        | Up         |
| Rho guanine nucleotide exchange factor (GEF) 3                            | <i>ARHGEF3</i> | <a href="#">782247</a> | 0007242 // intracellular signaling cascade // inferred from electronic annotation /// 0035023 // regulation of Rho protein signal transduction // inferred from electronic annotation                                                                           | 0.0001497 | 1.41        | Up         |
| sperm specific antigen 2                                                  | <i>SSFA2</i>   | <a href="#">538826</a> | ---                                                                                                                                                                                                                                                             | 0.0051964 | 1.42        | Up         |
| RAS guanyl releasing protein 1 (calcium and DAG-regulated)                | <i>RASGRP1</i> | <a href="#">533125</a> | 0051056 // regulation of small GTPase mediated signal transduction // inferred from electronic annotation                                                                                                                                                       | 0.0063476 | 1.43        | Up         |
| breast carcinoma amplified sequence 1                                     | <i>BCAS1</i>   | <a href="#">504895</a> | ---                                                                                                                                                                                                                                                             | 0.0063474 | 1.45        | Up         |
| malate dehydrogenase 1B,                                                  | <i>MDH1B</i>   | <a href="#">527943</a> | 0005975 // carbohydrate metabolic process // inferred from electronic annotation ///                                                                                                                                                                            | 0.0067785 | 1.46        | Up         |

| Gene Title                                  | Gene Symbol      | Entrez Gene            | Putative Function                                                                                                                                                                | P-value   | Fold Effect | Regulation |
|---------------------------------------------|------------------|------------------------|----------------------------------------------------------------------------------------------------------------------------------------------------------------------------------|-----------|-------------|------------|
| NAD (soluble)                               |                  |                        | 0006099 // tricarboxylic acid cycle // inferred from electronic annotation ///<br>0006108 // malate metabolic process // inferred from electronic annotation ///<br>0008152 // m |           |             |            |
| hypothetical protein LOC784592              | <i>LOC784592</i> | <a href="#">784592</a> | ---                                                                                                                                                                              | 0.0022122 | 1.48        | Up         |
| hydroxysteroid dehydrogenase like 2         | <i>HSDL2</i>     | <a href="#">404131</a> | 0008152 // metabolic process // inferred from electronic annotation                                                                                                              | 0.0006974 | 1.49        | Up         |
| pyruvate dehydrogenase kinase, isozyme 4    | <i>PK4</i>       | <a href="#">507367</a> | 0007165 // signal transduction // inferred from electronic annotation /// 0018106 // peptidyl-histidine phosphorylation // inferred from electronic annotation                   | 0.0033818 | 1.51        | Up         |
| aquaporin 4                                 | <i>AQP4</i>      | <a href="#">281008</a> | 0006810 // transport // inferred from electronic annotation                                                                                                                      | 0.0065753 | 1.56        | Up         |
| tubulointerstitial nephritis antigen-like 1 | <i>TINAGL1</i>   | <a href="#">509642</a> | 0006508 // proteolysis // inferred from electronic annotation /// 0006810 // transport // inferred from electronic annotation                                                    | 0.009497  | 1.56        | Up         |
| renal tumor antigen                         | <i>RAGE</i>      | <a href="#">616277</a> | 0006468 // protein amino acid phosphorylation // inferred from electronic annotation                                                                                             | 0.0097608 | 1.63        | Up         |
| IQ motif containing with AAA domain         | <i>IQCA</i>      | <a href="#">618101</a> | ---                                                                                                                                                                              | 0.0074774 | 1.63        | Up         |

| Gene Title                                                                             | Gene Symbol                         | Entrez Gene            | Putative Function                                                                                                                                                                                                                                               | P-value   | Fold Effect | Regulation |
|----------------------------------------------------------------------------------------|-------------------------------------|------------------------|-----------------------------------------------------------------------------------------------------------------------------------------------------------------------------------------------------------------------------------------------------------------|-----------|-------------|------------|
| SIX homeobox 1                                                                         | <i>SIX1</i>                         | <a href="#">511371</a> | 0006355 // regulation of transcription, DNA-dependent // inferred from electronic annotation /// 0045449 // regulation of transcription // inferred from electronic annotation                                                                                  | 0.0004177 | 1.75        | Up         |
| coiled-coil domain containing 39                                                       | <i>CCDC39</i>                       | <a href="#">534432</a> | ---                                                                                                                                                                                                                                                             | 0.0038289 | 1.79        | Up         |
| similar to axonemal dynein heavy chain DNAH5                                           | <i>LOC783755</i>                    | <a href="#">783755</a> | ---                                                                                                                                                                                                                                                             | 0.0077247 | 1.82        | Up         |
| IQ motif containing with AAA domain /// similar to IQ motif containing with AAA domain | <i>IQCA</i> ///<br><i>LOC787378</i> | 618116 ///<br>787378   | ---                                                                                                                                                                                                                                                             | 0.0083615 | 1.85        | Up         |
| WD repeat domain 16                                                                    | <i>WDR16</i>                        | <a href="#">505885</a> | ---                                                                                                                                                                                                                                                             | 0.0077216 | 1.85        | Up         |
| roporin 1-like                                                                         | <i>ROPNIL</i>                       | <a href="#">515565</a> | 0007165 // signal transduction // inferred from electronic annotation                                                                                                                                                                                           | 0.0080679 | 1.85        | Up         |
| myostatin                                                                              | <i>MSTN</i>                         | <a href="#">281187</a> | 0007179 // transforming growth factor beta receptor signaling pathway // inferred from electronic annotation /// 0040007 // growth // inferred from electronic annotation /// 0045941 // positive regulation of transcription // inferred from electronic annot | 0.0012126 | 2.04        | Up         |
| T-cell receptor delta chain                                                            | <i>TRD@</i>                         | <a href="#">404176</a> | ---                                                                                                                                                                                                                                                             | 0.0006777 | 2.07        | Up         |



| Gene Title                                                                                                    | Gene Symbol                          | Entrez Gene            | Putative Function                                                         | P-value   | Fold Effect | Regulation |
|---------------------------------------------------------------------------------------------------------------|--------------------------------------|------------------------|---------------------------------------------------------------------------|-----------|-------------|------------|
| similar to hydrocephalus inducing /// hydrocephalus inducing homolog (mouse)                                  | <i>HYDIN</i> ///<br><i>LOC504406</i> | 504406 ///<br>532419   | ---                                                                       | 0.0021916 | 2.13        | Up         |
| T-cell receptor delta chain                                                                                   | <i>TRD@</i>                          | <a href="#">404176</a> | ---                                                                       | 0.000896  | 2.48        | Up         |
| potassium channel regulator                                                                                   | <i>KCNRG</i>                         | <a href="#">404166</a> | 0006813 // potassium ion transport // inferred from electronic annotation | 0.0063194 | 2.72        | Up         |
| immunoglobulin light chain, lambda gene cluster /// immunoglobulin lambda-like polypeptide 1                  | <i>IGL@</i> ///<br><i>IPLL1</i>      | 505478 ///<br>789205   | ---                                                                       | 0.0018442 | 4.33        | Up         |
| immunoglobulin heavy constant gamma 1                                                                         | <i>IGHG1</i>                         | <a href="#">281850</a> | ---                                                                       | 0.0015763 | 4.54        | Up         |
| immunoglobulin heavy constant gamma 1                                                                         | <i>IGHG1</i>                         | <a href="#">281850</a> | ---                                                                       | 0.0004982 | 5.07        | Up         |
| IgG2a heavy chain constant region                                                                             | <i>IgCgamma</i>                      | <a href="#">404109</a> | ---                                                                       | 0.000702  | 5.28        | Up         |
| immunoglobulin heavy constant gamma 1                                                                         | <i>IGHG1</i>                         | <a href="#">281850</a> | ---                                                                       | 0.0002951 | 7.83        | Up         |
| Glutathione-S-transferase (GST) specific immunoglobulin light chain variable region (partial), anti-GST IgVL1 | ***                                  | ---                    | ---                                                                       | 0.0027767 | 8.20        | Up         |

| Gene Title                           | Gene Symbol      | Entrez Gene            | Putative Function | P-value   | Fold Effect | Regulation |
|--------------------------------------|------------------|------------------------|-------------------|-----------|-------------|------------|
| Ig kappa chain                       | <i>IGK</i>       | <a href="#">506890</a> | ---               | 0.0006477 | 9.68        | Up         |
| immunoglobulin light chain VJ region | <i>LOC404062</i> | <a href="#">404062</a> | ---               | 0.0003958 | 12.49       | Up         |
