# Supplementary material
Source: PubMed Central journal article supplement (PMC7094660)
Supplement: mmc4.pdf [file mmc4.pdf]

**Supplement 4.** List of genes with a lactation by pregnancy interaction effect in the intercaruncular endometrium on d 17 of the cycle or pregnancy. Genes were selected based on an absolute expression value > 40 and P-value <0.01

| Gene Title                                            | Gene Symbol    | Entrez Gene            | Putative Function                                                                                                                                                                                                                                               | P-value |
|-------------------------------------------------------|----------------|------------------------|-----------------------------------------------------------------------------------------------------------------------------------------------------------------------------------------------------------------------------------------------------------------|---------|
| thyroid hormone receptor interactor 12                | <i>TRIP12</i>  | <a href="#">514387</a> | 0006464 // protein modification process // inferred from electronic annotation /// 0006512 // ubiquitin cycle // inferred from electronic annotation                                                                                                            | 0.00017 |
| Alanine-glyoxylate aminotransferase 2-like 2          | <i>AGXT2L2</i> | <a href="#">537241</a> | ---                                                                                                                                                                                                                                                             | 0.00022 |
| uridine-cytidine kinase 1-like 1                      | <i>UCKL1</i>   | <a href="#">534046</a> | 0005975 // carbohydrate metabolic process // inferred from electronic annotation /// 0006952 // defense response // inferred from electronic annotation /// 0008152 // metabolic process // inferred from electronic annotation                                 | 0.00024 |
| ral guanine nucleotide dissociation stimulator-like 2 | <i>RGL2</i>    | <a href="#">504334</a> | 0007165 // signal transduction // inferred from electronic annotation /// 0007264 // small GTPase mediated signal transduction // inferred from electronic annotation /// 0051056 // regulation of small GTPase mediated signal transduction // inferred from e | 0.00024 |
| HemK methyltransferase family member 1                | <i>HEMK1</i>   | <a href="#">515459</a> | 0006306 // DNA methylation // inferred from electronic annotation /// 0006479 // protein amino acid methylation // inferred from electronic annotation /// 0032259 // methylation // inferred from electronic annotation                                        | 0.00071 |
| sorting and assembly machinery component 50 homolog   | <i>SAMM50</i>  | <a href="#">618777</a> | ---                                                                                                                                                                                                                                                             | 0.00074 |

| Gene Title                                         | Gene Symbol      | Entrez Gene            | Putative Function                                                                                                                                                                                                                  | P-value |
|----------------------------------------------------|------------------|------------------------|------------------------------------------------------------------------------------------------------------------------------------------------------------------------------------------------------------------------------------|---------|
| ubiquitin specific peptidase 20                    | <i>USP20</i>     | <a href="#">505839</a> | 0006511 // ubiquitin-dependent protein catabolic process // inferred from electronic annotation /// 0006512 // ubiquitin cycle // inferred from electronic annotation                                                              | 0.00075 |
| Werner helicase interacting protein 1              | <i>WRNIP1</i>    | 782711 /// 788824      | 0006270 // DNA replication initiation // inferred from electronic annotation /// 0006275 // regulation of DNA replication // inferred from electronic annotation /// 0006281 // DNA repair // inferred from electronic annotation  | 0.00076 |
| cyclin G associated kinase                         | <i>GAK</i>       | <a href="#">511296</a> | 0006468 // protein amino acid phosphorylation // inferred from electronic annotation                                                                                                                                               | 0.0008  |
| alpha-kinase 1                                     | <i>ALPK1</i>     | <a href="#">524375</a> | 0006468 // protein amino acid phosphorylation // inferred from electronic annotation                                                                                                                                               | 0.00081 |
| Similar to Zinc finger and BTB domain containing 8 | <i>LOC521943</i> | <a href="#">521943</a> | ---                                                                                                                                                                                                                                | 0.00099 |
| Rho GTPase activating protein 17                   | <i>ARHGAP17</i>  | <a href="#">504245</a> | 0006418 // tRNA aminoacylation for protein translation // inferred from electronic annotation /// 0007165 // signal transduction // inferred from electronic annotation                                                            | 0.00129 |
| chromosome 9 open reading frame 100 ortholog       | <i>C9orf100</i>  | <a href="#">780881</a> | 0035023 // regulation of Rho protein signal transduction // inferred from electronic annotation                                                                                                                                    | 0.00135 |
| syntaxin 5                                         | <i>STX5</i>      | <a href="#">510312</a> | 0006810 // transport // inferred from electronic annotation /// 0006886 // intracellular protein transport // inferred from electronic annotation /// 0016192 // vesicle-mediated transport // inferred from electronic annotation | 0.00202 |
| suppressor of var1, 3-like 1                       | <i>SUPV3L1</i>   | <a href="#">505988</a> | ---                                                                                                                                                                                                                                | 0.00231 |

| Gene Title                                                                       | Gene Symbol    | Entrez Gene            | Putative Function                                                                                                                                                | P-value |
|----------------------------------------------------------------------------------|----------------|------------------------|------------------------------------------------------------------------------------------------------------------------------------------------------------------|---------|
| (S. cerevisiae)                                                                  |                |                        |                                                                                                                                                                  |         |
| synaptotagmin-like 1                                                             | <i>SYTL1</i>   | <a href="#">527641</a> | 0006810 // transport // inferred from electronic annotation /// 0006886 // intracellular protein transport // inferred from electronic annotation                | 0.00262 |
| ribosomal protein S15a                                                           | <i>RPS15A</i>  | <a href="#">337888</a> | 0006412 // translation // inferred from electronic annotation                                                                                                    | 0.00288 |
| Sphingomyelin phosphodiesterase 4, neutral membrane (neutral sphingomyelinase-3) | <i>SMPD4</i>   | <a href="#">507207</a> | ---                                                                                                                                                              | 0.003   |
| tubulin tyrosine ligase-like family, member 12                                   | <i>TLL12</i>   | <a href="#">511319</a> | 0006464 // protein modification process // inferred from electronic annotation                                                                                   | 0.00306 |
| nuclear receptor subfamily 4, group A, member 1                                  | <i>NR4A1</i>   | <a href="#">528390</a> | 0006350 // transcription // inferred from electronic annotation /// 0006355 // regulation of transcription, DNA-dependent // inferred from electronic annotation | 0.00308 |
| solute carrier family 15, member 4                                               | <i>SLC15A4</i> | <a href="#">510499</a> | 0006857 // oligopeptide transport // inferred from electronic annotation                                                                                         | 0.00331 |
| chondroitin sulfate proteoglycan 5 (neuroglycan C)                               | <i>CSPG5</i>   | <a href="#">505866</a> | ---                                                                                                                                                              | 0.00333 |
| zinc finger, FYVE domain containing 26                                           | <i>ZFYVE26</i> | <a href="#">514402</a> | ---                                                                                                                                                              | 0.00354 |
| glucocorticoid modulatory element binding protein 2                              | <i>GMEB2</i>   | <a href="#">508301</a> | ---                                                                                                                                                              | 0.00367 |

| Gene Title                                                                             | Gene Symbol     | Entrez Gene            | Putative Function                                                                                                                                                                                                                                               | P-value |
|----------------------------------------------------------------------------------------|-----------------|------------------------|-----------------------------------------------------------------------------------------------------------------------------------------------------------------------------------------------------------------------------------------------------------------|---------|
| Biphenyl hydrolase-like (serine hydrolase; breast epithelial mucin-associated antigen) | <i>BPHL</i>     | <a href="#">505457</a> | ---                                                                                                                                                                                                                                                             | 0.00375 |
| AT rich interactive domain 5A (MRF1-like)                                              | <i>ARID5A</i>   | <a href="#">524118</a> | 0006350 // transcription // inferred from electronic annotation /// 0006355 // regulation of transcription, DNA-dependent // inferred from electronic annotation                                                                                                | 0.00382 |
| reelin                                                                                 | <i>RELN</i>     | <a href="#">281450</a> | 0000904 // cellular morphogenesis during differentiation // inferred from sequence or structural similarity /// 0001764 // neuron migration // inferred from sequence or structural similarity /// 0007417 // central nervous system development // inferred fr | 0.00383 |
| solute carrier family 38, member 2                                                     | <i>SLC38A2</i>  | <a href="#">338044</a> | 0006810 // transport // inferred from electronic annotation /// 0006811 // ion transport // inferred from electronic annotation /// 0006814 // sodium ion transport // inferred from electronic annotation /// 0006865 // amino acid transport // inferred from | 0.00384 |
| DPH2 homolog (S. cerevisiae)                                                           | <i>DPH2</i>     | <a href="#">768224</a> | ---                                                                                                                                                                                                                                                             | 0.00388 |
| dachsous 1 (Drosophila)                                                                | <i>DCHS1</i>    | <a href="#">515576</a> | 0007156 // homophilic cell adhesion // inferred from electronic annotation                                                                                                                                                                                      | 0.00394 |
| transforming, acidic coiled-coil containing protein 2                                  | <i>TACC2</i>    | <a href="#">533768</a> | ---                                                                                                                                                                                                                                                             | 0.00413 |
| transforming growth factor, beta receptor associated protein 1                         | <i>TGFBRAP1</i> | <a href="#">514660</a> | ---                                                                                                                                                                                                                                                             | 0.00417 |

| Gene Title                                                                                          | Gene Symbol                                 | Entrez Gene            | Putative Function                                                                                                                                                                                                                             | P-value |
|-----------------------------------------------------------------------------------------------------|---------------------------------------------|------------------------|-----------------------------------------------------------------------------------------------------------------------------------------------------------------------------------------------------------------------------------------------|---------|
| CDNA clone<br>IMAGE:8433672                                                                         | ---                                         | ---                    | ---                                                                                                                                                                                                                                           | 0.00417 |
| hypothetical protein<br>LOC508334                                                                   | <i>LOC508334</i>                            | <a href="#">508334</a> | ---                                                                                                                                                                                                                                           | 0.00443 |
| hect domain and RLD 2                                                                               | <i>HERC2</i>                                | <a href="#">535440</a> | 0006464 // protein modification process // inferred from electronic annotation /// 0006468 // protein amino acid phosphorylation // inferred from electronic annotation /// 0006512 // ubiquitin cycle // inferred from electronic annotation | 0.00465 |
| NLR family member X1                                                                                | <i>NLRX1</i>                                | <a href="#">539974</a> | ---                                                                                                                                                                                                                                           | 0.0049  |
| chromosome 15 open<br>reading frame 44 ortholog                                                     | <i>C10H15orf4</i><br>4                      | <a href="#">534159</a> | ---                                                                                                                                                                                                                                           | 0.00508 |
| similar to FLJ10769 protein                                                                         | <i>LOC613996</i>                            | <a href="#">613996</a> | ---                                                                                                                                                                                                                                           | 0.00526 |
| GTP binding protein 1                                                                               | <i>GTPBP1</i>                               | <a href="#">513922</a> | 0006418 // tRNA aminoacylation for protein translation // inferred from electronic annotation                                                                                                                                                 | 0.0054  |
| polymerase (RNA) I<br>polypeptide A, 194kDa                                                         | <i>POLR1A</i>                               | <a href="#">536316</a> | ---                                                                                                                                                                                                                                           | 0.00541 |
| similar to poly-(ADP-<br>ribose) polymerase II ///<br>similar to poly (ADP-<br>ribose) polymerase 2 | <i>LOC505828</i><br>///<br><i>LOC783580</i> | 505828 ///<br>783580   | 0006471 // protein amino acid ADP-ribosylation // inferred from electronic annotation /// 0006508 // proteolysis // inferred from electronic annotation                                                                                       | 0.00541 |
| similar to putative E3<br>ubiquitin ligase                                                          | <i>LOC540077</i>                            | <a href="#">540077</a> | 0006511 // ubiquitin-dependent protein catabolic process // inferred from electronic annotation /// 0030071 // regulation of mitotic                                                                                                          | 0.00556 |

| Gene Title                                                                  | Gene Symbol      | Entrez Gene            | Putative Function                                                                                                                                                                                                                                               | P-value |
|-----------------------------------------------------------------------------|------------------|------------------------|-----------------------------------------------------------------------------------------------------------------------------------------------------------------------------------------------------------------------------------------------------------------|---------|
|                                                                             |                  |                        | metaphase/anaphase transition // inferred from electronic annotation                                                                                                                                                                                            |         |
| zinc finger protein 142                                                     | <i>ZNF142</i>    | <a href="#">511573</a> | ---                                                                                                                                                                                                                                                             | 0.00562 |
| similar to Dual-specificity tyrosine-(Y)-phosphorylation regulated kinase 2 | <i>LOC514916</i> | <a href="#">514916</a> | 0006468 // protein amino acid phosphorylation // inferred from electronic annotation                                                                                                                                                                            | 0.00576 |
| HECT domain containing 3                                                    | <i>HECTD3</i>    | <a href="#">513646</a> | 0006464 // protein modification process // inferred from electronic annotation /// 0006512 // ubiquitin cycle // inferred from electronic annotation /// 0030071 // regulation of mitotic metaphase/anaphase transition // inferred from electronic annotation  | 0.00586 |
| similar to AIM1                                                             | <i>LOC526200</i> | <a href="#">526200</a> | ---                                                                                                                                                                                                                                                             | 0.00617 |
| replication initiator 1                                                     | <i>REPIN1</i>    | <a href="#">511510</a> | 0006260 // DNA replication // inferred from electronic annotation                                                                                                                                                                                               | 0.00635 |
| dual specificity phosphatase 12                                             | <i>DUSP12</i>    | <a href="#">505302</a> | 0006470 // protein amino acid dephosphorylation // inferred from electronic annotation /// 0016311 // dephosphorylation // inferred from electronic annotation                                                                                                  | 0.00644 |
| adaptor-related protein complex 3, delta 1 subunit                          | <i>AP3D1</i>     | <a href="#">281023</a> | 0006461 // protein complex assembly // inferred from electronic annotation /// 0006810 // transport // inferred from electronic annotation /// 0006886 // intracellular protein transport // inferred from electronic annotation /// 0015031 // protein transpo | 0.00659 |
| centrobin, centrosomal BRCA2 interacting protein                            | <i>CNTROB</i>    | <a href="#">539106</a> | ---                                                                                                                                                                                                                                                             | 0.00672 |
| sialic acid acetyltransferase                                               | <i>SIAE</i>      | <a href="#">507461</a> | ---                                                                                                                                                                                                                                                             | 0.00702 |

| Gene Title                                                                 | Gene Symbol      | Entrez Gene            | Putative Function                                                                                                                             | P-value |
|----------------------------------------------------------------------------|------------------|------------------------|-----------------------------------------------------------------------------------------------------------------------------------------------|---------|
| transformation/transcription domain-associated protein                     | <i>TRRAP</i>     | <a href="#">507169</a> | ---                                                                                                                                           | 0.00716 |
| ADP-ribosylation factor-like 2                                             | <i>ARL2</i>      | <a href="#">511349</a> | 0007264 // small GTPase mediated signal transduction // inferred from electronic annotation                                                   | 0.00723 |
| Microtubule associated monooxygenase, calponin and LIM domain containing 2 | <i>MICAL2</i>    | <a href="#">534041</a> | 0006725 // aromatic compound metabolic process // inferred from electronic annotation                                                         | 0.00735 |
| ectonucleoside triphosphate diphosphohydrolase 4                           | <i>ENTPD4</i>    | <a href="#">531411</a> | ---                                                                                                                                           | 0.00752 |
| mahogunin, ring finger 1                                                   | <i>MGRN1</i>     | <a href="#">616130</a> | ---                                                                                                                                           | 0.0076  |
| isovaleryl Coenzyme A dehydrogenase                                        | <i>IVD</i>       | <a href="#">510440</a> | 0008152 // metabolic process // inferred from electronic annotation /// 0055114 // oxidation reduction // inferred from electronic annotation | 0.00772 |
| kelch domain containing 3                                                  | <i>KLHDC3</i>    | <a href="#">541138</a> | 0007126 // meiosis // inferred from electronic annotation                                                                                     | 0.00778 |
| hypothetical LOC618886                                                     | <i>LOC618886</i> | <a href="#">618886</a> | ---                                                                                                                                           | 0.00788 |
| kinesin family member 3B                                                   | <i>KIF3B</i>     | <a href="#">508404</a> | 0007018 // microtubule-based movement // inferred from electronic annotation                                                                  | 0.00792 |
| crooked neck pre-mRNA splicing factor-like 1 (Drosophila)                  | <i>CRNKL1</i>    | <a href="#">526536</a> | ---                                                                                                                                           | 0.00802 |
| minichromosome maintenance complex                                         | <i>MCM3AP</i>    | <a href="#">534293</a> | ---                                                                                                                                           | 0.00803 |

| Gene Title                                                                 | Gene Symbol      | Entrez Gene            | Putative Function                                                                                                                                                                                                                                               | P-value |
|----------------------------------------------------------------------------|------------------|------------------------|-----------------------------------------------------------------------------------------------------------------------------------------------------------------------------------------------------------------------------------------------------------------|---------|
| component 3 associated protein                                             |                  |                        |                                                                                                                                                                                                                                                                 |         |
| nuclear receptor binding protein 2                                         | <i>NRBP2</i>     | <a href="#">504664</a> | 0006468 // protein amino acid phosphorylation // inferred from electronic annotation                                                                                                                                                                            | 0.00837 |
| coenzyme Q6 homolog, monooxygenase (S. cerevisiae)                         | <i>COQ6</i>      | <a href="#">511624</a> | 0006725 // aromatic compound metabolic process // inferred from electronic annotation /// 0006744 // ubiquinone biosynthetic process // inferred from electronic annotation /// 0008152 // metabolic process // inferred from electronic annotation /// 0055114 | 0.00878 |
| hexosaminidase (glycosyl hydrolase family 20, catalytic domain) containing | <i>HEXDC</i>     | <a href="#">506184</a> | 0005975 // carbohydrate metabolic process // inferred from electronic annotation /// 0008152 // metabolic process // inferred from electronic annotation                                                                                                        | 0.00882 |
| 2-deoxyribose-5-phosphate aldolase homolog (C. elegans)                    | <i>DERA</i>      | <a href="#">534558</a> | 0008152 // metabolic process // inferred from electronic annotation /// 0009264 // deoxyribonucleotide catabolic process // inferred from electronic annotation                                                                                                 | 0.00894 |
| similar to hexokinase II                                                   | <i>LOC614107</i> | <a href="#">614107</a> | 0006096 // glycolysis // inferred from electronic annotation                                                                                                                                                                                                    | 0.00898 |
| adenylate cyclase 6                                                        | <i>ADCY6</i>     | <a href="#">509936</a> | 0007242 // intracellular signaling cascade // inferred from electronic annotation /// 0009190 // cyclic nucleotide biosynthetic process // inferred from electronic annotation                                                                                  | 0.00902 |
| similar to Ras-GTPase-activating protein SH3-domain-binding protein        | <i>LOC783166</i> | <a href="#">783166</a> | ---                                                                                                                                                                                                                                                             | 0.00904 |
| COP9 constitutive photomorphogenic homolog subunit 7B (Arabidopsis)        | <i>COPS7B</i>    | <a href="#">617995</a> | ---                                                                                                                                                                                                                                                             | 0.00918 |



| Gene Title                                  | Gene Symbol   | Entrez Gene               | Putative Function                                                                 | P-value |
|---------------------------------------------|---------------|---------------------------|-----------------------------------------------------------------------------------|---------|
| jumonji domain containing 1A                | <i>JMJD1A</i> | <a href="#">536073</a>    | 0007242 // intracellular signaling cascade // inferred from electronic annotation | 0.00919 |
| ribosomal protein L21                       | <i>RPL21</i>  | <a href="#">326584</a>    | 0006412 // translation // inferred from electronic annotation                     | 0.00919 |
| Arginine and glutamate rich 1               | <i>ARGLU1</i> | <a href="#">540543</a>    | ---                                                                               | 0.0092  |
| WD repeat domain 5                          | <i>WDR5</i>   | <a href="#">100125836</a> | ---                                                                               | 0.00938 |
| spastic paraplegia 11 (autosomal recessive) | <i>SPG11</i>  | <a href="#">507819</a>    | ---                                                                               | 0.00947 |
