# Supplementary material
Source: PubMed Central journal article supplement (PMC7094660)
Supplement: mmc5.pdf [file mmc5.pdf]

**Supplement 5.** Gene ontology terms ( $P < 0.10$ ) affected by lactation and pregnancy in the intercaruncular endometrium on d 17 of the cycle or pregnancy

| Term                                   | Gene, n | P-value  | Main Effect | Regulation | Genes                                                                                                                                                                                                                                                                                             |
|----------------------------------------|---------|----------|-------------|------------|---------------------------------------------------------------------------------------------------------------------------------------------------------------------------------------------------------------------------------------------------------------------------------------------------|
| GO:0006952~defense response            | 39      | 2.61E-11 | Pregnancy   | Up         | <i>IFIH1, NMI, CCL2, AIF1, CXCL2, CCL8, RSAD2, C1QC, CXCL10, CFP, LGALS3BP, FCGRIA, TAP1, SERPINA1, C2, PTX3, MX1, MX2, PLD1, NCF2, CFB, IL1RN, RNASE6, ANXA1, SERPING1, CD40, SP140, S100A12, CCL11, C1QA, DDX58, SIGLEC1, C1QB, TNFAIP6, CCR7, NUPR1, IL20RB, IRF7, MST1R</i>                   |
| GO:0006955~immune response             | 41      | 5.19E-11 | Pregnancy   | Up         | <i>IFIH1, PXDN, CCL2, IFITM3, ENPP3, CXCL2, CCL8, RSAD2, OAS1, C1QC, IFI35, CXCL10, CFP, FCGRIA, TAP1, FCER1G, C2, FCGR3A, PTX3, GBP5, NCF2, CFB, IL1RN, TNFRSF13B, SERPING1, TINAGL1, PRKCD, PSMB9, CCL11, C1QA, DDX58, C1QB, CCR7, CD86, IL18BP, TNFSF13B, IL20RB, IRF8, RNF19B, GBP4, IFI6</i> |
| GO:0009615~response to virus           | 17      | 1.07E-10 | Pregnancy   | Up         | <i>IFIH1, CCL8, RSAD2, IFI44, STAT1, IFI35, ISG20, STAT2, DDX58, IRF9, CCL11, ISG15, IRF7, IRF3, MX1, EIF2AK2, MX2</i>                                                                                                                                                                            |
| GO:0009607~response to biotic stimulus | 29      | 3.41E-10 | Pregnancy   | Up         | <i>IFIH1, CCL2, IFITM1, IFITM3, RSAD2, CCL8, IFI35, ISG20, CFP, ISG15, DNAJA1, IFITM5, SERPINA1, MX1, PTX3, MX2, PLD1, CFB, SOCS1, IFI44, STAT1, S100A12, STAT2, CCL11, DDX58, IRF9, IRF7, IRF3, EIF2AK2</i>                                                                                      |
| GO:0006954~inflammatory response       | 26      | 1.05E-09 | Pregnancy   | Up         | <i>CCL2, NMI, AIF1, CXCL2, CCL8, C1QC, CXCL10, CFP, SERPINA1, C2, PTX3, CFB, IL1RN, ANXA1, SERPING1, CD40, S100A12, C1QA, CCL11, TNFAIP6,</i>                                                                                                                                                     |

| Term                                  | Gene,<br>n | P-value  | Main Effect | Regulation | Genes                                                                                                                                                                                                                                                                                                                                                                                                                                                                                                                                                                                                                                                                                                                                    |
|---------------------------------------|------------|----------|-------------|------------|------------------------------------------------------------------------------------------------------------------------------------------------------------------------------------------------------------------------------------------------------------------------------------------------------------------------------------------------------------------------------------------------------------------------------------------------------------------------------------------------------------------------------------------------------------------------------------------------------------------------------------------------------------------------------------------------------------------------------------------|
|                                       |            |          |             |            | <i>C1QB, SIGLEC1, CCR7, IL20RB, NUPRI, IRF7</i>                                                                                                                                                                                                                                                                                                                                                                                                                                                                                                                                                                                                                                                                                          |
| GO:0051707~response to other organism | 24         | 2.83E-09 | Pregnancy   | Up         | <i>IFIH1, PLD1, CCL2, SOCS1, RSAD2, CCL8, IFI44, STAT1, IFI35, S100A12, ISG20, STAT2, DDX58, CCL11, IRF9, CFP, ISG15, IRF7, IRF3, SERPINA1, EIF2AK2, MX1, PTX3, MX2</i>                                                                                                                                                                                                                                                                                                                                                                                                                                                                                                                                                                  |
| GO:0002376~immune system process      | 47         | 3.10E-09 | Pregnancy   | Up         | <i>IFIH1, PXDN, CCL2, IFITM3, ENPP3, CXCL2, CCL8, RSAD2, OAS1, C1QC, IFI35, CXCL10, HSH2D, CFP, FCGR1A, TAP1, FCER1G, C2, FCGR3A, PTX3, GBP5, EPAS1, NCF2, CFB, HCLS1, IL1RN, TNFRSF13B, SERPING1, CD40, TINAGL1, PRKCD, PSMB9, CCL11, C1QA, DNASE2, DDX58, C1QB, CCR7, CD86, IL18BP, TNFSF13B, IL20RB, IRF8, IRF1, RNF19B, GBP4, IFI6</i>                                                                                                                                                                                                                                                                                                                                                                                               |
| GO:0050896~response to stimulus       | 103        | 5.05E-08 | Pregnancy   | Up         | <i>OSMR, AIF1, CNP, C1QC, CXCL10, ISG20, CFP, ISG15, SLC2A1, MX1, MX2, HIGD1A, PLD1, GBP5, NCF2, CRYAB, SOCS1, FBP1, IFI44, SERPING1, CD40, SP140, C1QA, TNFAIP6, C1QB, CCR7, TACSTD2, ARRB1, MST1R, EIF2AK2, GBP4, IFIH1, CCL2, RTP4, IFITM1, IFITM3, ENPP3, CCL8, OAS1, BCL2L1, ASL, IFI35, LGALS3BP, DNAJA1, IFITM5, FCER1G, COL18A1, EPAS1, CFB, TNFRSF13B, IL1RN, TREX1, TINAGL1, S100A12, PSMB9, DDX58, FABP3, IFI6, PXDN, TACR3, HEXB, DAXX, GSS, SERPINA1, CASP1, FCGR3A, DDC, AIFM1, PRKCD, SIGLEC1, CD86, IL18BP, TNFSF13B, IL20RB, CA4, GADD45B, NMI, CXCL2, RSAD2, ABHD2, CDH1, PRSS8, DDX19B, FCGR1A, TAP1, NEDD4L, C2, PTX3, SLC12A2, SELL, HCLS1, RNASE6, ANXA1, STAT1, STAT2, CCL11, IRF9, ATXN3, NUPRI, IRF7, IRF8,</i> |

| Term                                 | Gene,<br>n | P-value  | Main Effect | Regulation | Genes                                                                                                                                                                                                                                                                                                                                                                                                                                    |
|--------------------------------------|------------|----------|-------------|------------|------------------------------------------------------------------------------------------------------------------------------------------------------------------------------------------------------------------------------------------------------------------------------------------------------------------------------------------------------------------------------------------------------------------------------------------|
|                                      |            |          |             |            | <i>IRF3, RNF19B</i>                                                                                                                                                                                                                                                                                                                                                                                                                      |
| GO:0051704~multi-organism process    | 35         | 7.06E-08 | Pregnancy   | Up         | <i>IFIH1, CCL2, CLDN4, HEXB, RSAD2, CCL8, DAXX, IFI35, ISG20, CFP, ISG15, TAP1, RBCK1, SERPINA1, NEDD4L, PTX3, MX1, MX2, CFLAR, PLD1, SLC25A5, SOCS1, IFI44, STAT1, GTF2B, S100A12, STAT2, CCL11, IRF9, DDX58, CD86, IRF7, IRF3, EIF2AK2, KPNA2</i>                                                                                                                                                                                      |
| GO:0006950~response to stress        | 60         | 3.31E-07 | Pregnancy   | Up         | <i>PXDN, TACR3, AIF1, C1QC, DAXX, CXCL10, CFP, GSS, SLC2A1, SERPINA1, CASP1, MX1, MX2, HIGD1A, PLD1, NCF2, AIFM1, CRYAB, SERPING1, CD40, SP140, C1QA, SIGLEC1, C1QB, TNFAIP6, CCR7, IL20RB, MST1R, GADD45B, EIF2AK2, IFIH1, NMI, CCL2, CXCL2, CCL8, RSAD2, ABHD2, BCL2L1, ASL, LGALS3BP, FCGR1A, TAP1, DNAJA1, C2, PTX3, COL18A1, EPAS1, SLC12A2, CFB, RNASE6, IL1RN, ANXA1, TREX1, STAT1, S100A12, CCL11, DDX58, ATXN3, NUPR1, IRF7</i> |
| GO:0009611~response to wounding      | 27         | 3.81E-06 | Pregnancy   | Up         | <i>NMI, CCL2, AIF1, CXCL2, CCL8, ABHD2, C1QC, CXCL10, CFP, SERPINA1, C2, PTX3, CFB, IL1RN, ANXA1, SERPING1, CD40, S100A12, C1QA, CCL11, TNFAIP6, C1QB, SIGLEC1, CCR7, IL20RB, NUPR1, IRF7</i>                                                                                                                                                                                                                                            |
| GO:0002252~immune effector process   | 12         | 3.13E-05 | Pregnancy   | Up         | <i>C1QA, CFP, C1QB, TNFSF13B, CFB, FCER1G, RSAD2, SERPING1, C2, PTX3, C1QC, PRKCD</i>                                                                                                                                                                                                                                                                                                                                                    |
| GO:0043436~oxoacid metabolic process | 25         | 7.17E-05 | Pregnancy   | Up         | <i>ZNFYX1, CREM, ASL, GSS, WARS, SLC16A1, ARG2, ALOX5AP, MARS2, DDC, PLD1, MTHFD2L, YARS,</i>                                                                                                                                                                                                                                                                                                                                            |

| Term                                                                             | Gene,<br>n | P-value  | Main Effect | Regulation | Genes                                                                                                                                                                                                                                                                   |
|----------------------------------------------------------------------------------|------------|----------|-------------|------------|-------------------------------------------------------------------------------------------------------------------------------------------------------------------------------------------------------------------------------------------------------------------------|
|                                                                                  |            |          |             |            | <i>ALDH5A1, FBP1, CYP26A1, LYPLA1, DLAT, CRAT, PCK2, ATF3, FABP3, SLC27A2, SLC27A5, ALOX12</i>                                                                                                                                                                          |
| GO:0019752~carboxylic acid metabolic process                                     | 25         | 7.17E-05 | Pregnancy   | Up         | <i>ZNFYX1, CREM, ASL, GSS, WARS, SLC16A1, ARG2, ALOX5AP, MARS2, DDC, PLD1, MTHFD2L, YARS, ALDH5A1, FBP1, CYP26A1, LYPLA1, DLAT, CRAT, PCK2, ATF3, FABP3, SLC27A2, SLC27A5, ALOX12</i>                                                                                   |
| GO:0006082~organic acid metabolic process                                        | 25         | 8.07E-05 | Pregnancy   | Up         | <i>ZNFYX1, CREM, ASL, GSS, WARS, SLC16A1, ARG2, ALOX5AP, MARS2, DDC, PLD1, MTHFD2L, YARS, ALDH5A1, FBP1, CYP26A1, LYPLA1, DLAT, CRAT, PCK2, ATF3, FABP3, SLC27A2, SLC27A5, ALOX12</i>                                                                                   |
| GO:0042180~cellular ketone metabolic process                                     | 25         | 9.78E-05 | Pregnancy   | Up         | <i>ZNFYX1, CREM, ASL, GSS, WARS, SLC16A1, ARG2, ALOX5AP, MARS2, DDC, PLD1, MTHFD2L, YARS, ALDH5A1, FBP1, CYP26A1, LYPLA1, DLAT, CRAT, PCK2, ATF3, FABP3, SLC27A2, SLC27A5, ALOX12</i>                                                                                   |
| GO:0006956~complement activation                                                 | 7          | 9.96E-05 | Pregnancy   | Up         | <i>C1QA, CFP, C1QB, CFB, SERPING1, C2, C1QC</i>                                                                                                                                                                                                                         |
| GO:0002541~activation of plasma proteins involved in acute inflammatory response | 7          | 1.14E-04 | Pregnancy   | Up         | <i>C1QA, CFP, C1QB, CFB, SERPING1, C2, C1QC</i>                                                                                                                                                                                                                         |
| GO:0048518~positive regulation of biological process                             | 60         | 1.14E-04 | Pregnancy   | Up         | <i>NAMPT, MSRI, TACR3, OSMR, DAXX, C1QC, CXCL10, FOXS1, CFP, CASP4, CASP1, MX1, BOC, SERTAD1, MATK, PLD1, AIFM1, SERPING1, CD40, C1QA, C1QB, TRIM38, CD86, IL20RB, TNFSF13B, SGSM3, MSTIR, ALOX12, FGD2, CCL2, ABLIM3, CDH1, BCL2L1, STK17A, PSMF1, DDX19B, SHISA5,</i> |

| Term                                                                                                                                 | Gene,<br>n | P-value  | Main Effect | Regulation | Genes                                                                                                                                                                |
|--------------------------------------------------------------------------------------------------------------------------------------|------------|----------|-------------|------------|----------------------------------------------------------------------------------------------------------------------------------------------------------------------|
|                                                                                                                                      |            |          |             |            | <i>PYCARD, FCER1G, AGRN, C2, NEDD4L, PTX3, COL18A1, SOAT1, CFLAR, EPAS1, CFB, HCLS1, NR4A1, STAT1, LGALS9, PSMB9, DDX58, ATF3, NUPR1, IRF6, IRF7, CDKN2AIP, IRF1</i> |
| GO:0044419~interspecies interaction between organisms                                                                                | 16         | 2.00E-04 | Pregnancy   | Up         | <i>CFLAR, IFIH1, SLC25A5, STAT1, GTF2B, DAXX, STAT2, CD86, ISG15, IRF7, TAP1, RBCK1, IRF3, NEDD4L, EIF2AK2, KPNA2</i>                                                |
| GO:0045087~innate immune response                                                                                                    | 11         | 2.02E-04 | Pregnancy   | Up         | <i>C1QA, CFP, DDX58, C1QB, IFIH1, NCF2, CFB, FCGR1A, SERPING1, C2, C1QC</i>                                                                                          |
| GO:0032787~monocarboxylic acid metabolic process                                                                                     | 16         | 3.84E-04 | Pregnancy   | Up         | <i>MTHFD2L, ALDH5A1, CREM, FBP1, CYP26A1, LYPLA1, CRAT, DLAT, PCK2, SLC16A1, ATF3, ALOX5AP, FABP3, SLC27A2, SLC27A5, ALOX12</i>                                      |
| GO:0002526~acute inflammatory response                                                                                               | 9          | 3.94E-04 | Pregnancy   | Up         | <i>C1QA, CFP, C1QB, NUPR1, CFB, SERPING1, SERPINA1, C2, C1QC</i>                                                                                                     |
| GO:0016064~immunoglobulin mediated immune response                                                                                   | 7          | 4.09E-04 | Pregnancy   | Up         | <i>C1QA, C1QB, FCER1G, SERPING1, C2, C1QC, PRKCD</i>                                                                                                                 |
| GO:0002460~adaptive immune response based on somatic recombination of immune receptors built from immunoglobulin superfamily domains | 8          | 4.74E-04 | Pregnancy   | Up         | <i>C1QA, C1QB, IL18BP, FCER1G, SERPING1, C2, C1QC, PRKCD</i>                                                                                                         |
| GO:0002250~adaptive immune response                                                                                                  | 8          | 4.74E-04 | Pregnancy   | Up         | <i>C1QA, C1QB, IL18BP, FCER1G, SERPING1, C2, C1QC, PRKCD</i>                                                                                                         |

| Term                                                | Gene,<br>n | P-value  | Main Effect | Regulation | Genes                                                                                                                                                                                                                                                                          |
|-----------------------------------------------------|------------|----------|-------------|------------|--------------------------------------------------------------------------------------------------------------------------------------------------------------------------------------------------------------------------------------------------------------------------------|
| GO:0019724~B cell mediated immunity                 | 7          | 4.99E-04 | Pregnancy   | Up         | <i>C1QA, C1QB, FCER1G, SERPING1, C2, C1QC, PRKCD</i>                                                                                                                                                                                                                           |
| GO:0009605~response to external stimulus            | 32         | 5.26E-04 | Pregnancy   | Up         | <i>NMI, CCL2, AIF1, CXCL2, CCL8, ABHD2, ASL, C1QC, CXCL10, CFP, SERPINA1, C2, PTX3, PLD1, SLC12A2, CFB, IL1RN, ANXA1, SERPING1, CD40, STAT1, S100A12, CCL11, C1QA, SIGLEC1, TNFAIP6, C1QB, CCR7, NUPRI, IL20RB, ARRB1, IRF7</i>                                                |
| GO:0006959~humoral immune response                  | 8          | 5.54E-04 | Pregnancy   | Up         | <i>C1QA, CFP, C1QB, CCL2, CFB, SERPING1, C2, C1QC</i>                                                                                                                                                                                                                          |
| GO:0050776~regulation of immune response            | 13         | 8.46E-04 | Pregnancy   | Up         | <i>CFB, SERPING1, CD40, C1QC, CFP, C1QA, DDX58, C1QB, CD86, IL20RB, TNFSF13B, FCER1G, C2</i>                                                                                                                                                                                   |
| GO:0042221~response to chemical stimulus            | 39         | 0.001566 | Pregnancy   | Up         | <i>PXDN, RTP4, CCL2, TACR3, OSMR, CXCL2, CCL8, CDH1, BCL2L1, ASL, CXCL10, PRSS8, GSS, DDX19B, DNAJA1, SERPINA1, NEDD4L, CASP1, COL18A1, DDC, PLD1, EPAS1, CFB, CRYAB, SELL, HCLS1, IL1RN, SOCS1, FBP1, STAT1, S100A12, CCL11, C1QB, CCR7, NUPRI, FABP3, CA4, IRF3, EIF2AK2</i> |
| GO:0002449~lymphocyte mediated immunity             | 7          | 0.001635 | Pregnancy   | Up         | <i>C1QA, C1QB, FCER1G, SERPING1, C2, C1QC, PRKCD</i>                                                                                                                                                                                                                           |
| GO:0006958~complement activation, classical pathway | 5          | 0.001731 | Pregnancy   | Up         | <i>C1QA, C1QB, SERPING1, C2, C1QC</i>                                                                                                                                                                                                                                          |
| GO:0048583~regulation of response to stimulus       | 19         | 0.002002 | Pregnancy   | Up         | <i>TACR3, OSMR, CFB, SOCS1, SERPING1, CD40, PRKCD, C1QC, DAXX, DDX58, CFP, C1QA, C1QB,</i>                                                                                                                                                                                     |

| Term                                                                      | Gene,<br>n | P-value  | Main Effect | Regulation | Genes                                                                                                                                                                                                       |
|---------------------------------------------------------------------------|------------|----------|-------------|------------|-------------------------------------------------------------------------------------------------------------------------------------------------------------------------------------------------------------|
|                                                                           |            |          |             |            | <i>CD86, TNFSF13B, IL20RB, IRF7, FCER1G, C2</i>                                                                                                                                                             |
| GO:0042127~regulation of cell proliferation                               | 27         | 0.002129 | Pregnancy   | Up         | <i>NAMPT, CCL2, IFITM1, AIF1, OSMR, BCL2L1, CXCL10, WARS, MORC3, SERTAD1, MATK, COL18A1, HCLS1, TNFRSF13B, ANXA1, CD40, STAT1, CD86, ATF3, TNFSF13B, IL20RB, NUPR1, IRF6, FABP3, MST1R, EIF2AK2, ALOX12</i> |
| GO:0002455~humoral immune response mediated by circulating immunoglobulin | 5          | 0.00223  | Pregnancy   | Up         | <i>C1QA, C1QB, SERPING1, C2, C1QC</i>                                                                                                                                                                       |
| GO:0008219~cell death                                                     | 25         | 0.002792 | Pregnancy   | Up         | <i>FGD2, STK17A, BCL2L1, DNASE1L3, DAXX, CASP4, SHISA5, PYCARD, XAF1, CASP1, AATK, CFLAR, BCL2L15, YARS, BCL2L14, AIFM1, TREX1, OPTN, STAT1, BCL2L12, DNASE2, ATXN3, EIF2AK2, GADD45B, IFI6</i>             |
| GO:0009725~response to hormone stimulus                                   | 16         | 0.002808 | Pregnancy   | Up         | <i>PLD1, CCL2, TACR3, CRYAB, HCLS1, SOCS1, IL1RN, FBP1, BCL2L1, ASL, STAT1, PRSS8, C1QB, FABP3, CA4, SERPINA1</i>                                                                                           |
| GO:0016265~death                                                          | 25         | 0.003049 | Pregnancy   | Up         | <i>FGD2, STK17A, BCL2L1, DNASE1L3, DAXX, CASP4, SHISA5, PYCARD, XAF1, CASP1, AATK, CFLAR, BCL2L15, YARS, BCL2L14, AIFM1, TREX1, OPTN, STAT1, BCL2L12, DNASE2, ATXN3, EIF2AK2, GADD45B, IFI6</i>             |
| GO:0006915~apoptosis                                                      | 22         | 0.003073 | Pregnancy   | Up         | <i>FGD2, CFLAR, BCL2L15, YARS, BCL2L14, AIFM1, BCL2L1, STK17A, STAT1, BCL2L12, DNASE1L3, DAXX, DNASE2, CASP4, SHISA5, PYCARD, XAF1,</i>                                                                     |

| Term                                                   | Gene,<br>n | P-value  | Main Effect | Regulation | Genes                                                                                                                                                                       |
|--------------------------------------------------------|------------|----------|-------------|------------|-----------------------------------------------------------------------------------------------------------------------------------------------------------------------------|
|                                                        |            |          |             |            | <i>EIF2AK2, GADD45B, CASP1, IFI6, AATK</i>                                                                                                                                  |
| GO:0032020~ISG15-protein conjugation                   | 3          | 0.003136 | Pregnancy   | Up         | <i>ISG15, UBA7, UBE2L6</i>                                                                                                                                                  |
| GO:0012501~programmed cell death                       | 22         | 0.003668 | Pregnancy   | Up         | <i>FGD2, CFLAR, BCL2L15, YARS, BCL2L14, AIFM1, BCL2L1, STK17A, STAT1, BCL2L12, DNASE1L3, DAXX, DNASE2, CASP4, SHISA5, PYCARD, XAF1, EIF2AK2, GADD45B, CASP1, IFI6, AATK</i> |
| GO:0016485~protein processing                          | 8          | 0.004193 | Pregnancy   | Up         | <i>C1QA, CFP, C1QB, CFB, SERPING1, C2, CASP1, C1QC</i>                                                                                                                      |
| GO:0051605~protein maturation by peptide bond cleavage | 7          | 0.004618 | Pregnancy   | Up         | <i>C1QA, CFP, C1QB, CFB, SERPING1, C2, C1QC</i>                                                                                                                             |
| GO:0002443~leukocyte mediated immunity                 | 7          | 0.004618 | Pregnancy   | Up         | <i>C1QA, C1QB, FCER1G, SERPING1, C2, C1QC, PRKCD</i>                                                                                                                        |
| GO:0050778~positive regulation of immune response      | 9          | 0.004836 | Pregnancy   | Up         | <i>C1QA, CFP, C1QB, TNFSF13B, CFB, FCER1G, SERPING1, C2, C1QC</i>                                                                                                           |
| GO:0007259~JAK-STAT cascade                            | 5          | 0.005208 | Pregnancy   | Up         | <i>NMI, CCL2, SOCS1, STAT1, STAT2</i>                                                                                                                                       |
| GO:0010033~response to organic substance               | 24         | 0.005891 | Pregnancy   | Up         | <i>PLD1, CCL2, TACR3, OSMR, CFB, SELL, CRYAB, HCLS1, SOCS1, IL1RN, FBP1, CDH1, BCL2L1, ASL, STAT1, PRSS8, C1QB, DNAJA1, FABP3, CA4, IRF3, SERPINA1, EIF2AK2, CASP1</i>      |



| Term                                                 | Gene,<br>n | P-value  | Main Effect | Regulation | Genes                                                                                                                                                                                                                        |
|------------------------------------------------------|------------|----------|-------------|------------|------------------------------------------------------------------------------------------------------------------------------------------------------------------------------------------------------------------------------|
| GO:0002673~regulation of acute inflammatory response | 4          | 0.006091 | Pregnancy   | Up         | <i>IL20RB, OSMR, FCER1G, SERPING1</i>                                                                                                                                                                                        |
| GO:0051604~protein maturation                        | 8          | 0.006665 | Pregnancy   | Up         | <i>CIQA, CFP, CIQB, CFB, SERPING1, C2, CASP1, CIQC</i>                                                                                                                                                                       |
| GO:0006090~pyruvate metabolic process                | 5          | 0.006795 | Pregnancy   | Up         | <i>SLC16A1, ATF3, FBP1, DLAT, PCK2</i>                                                                                                                                                                                       |
| GO:0009719~response to endogenous stimulus           | 16         | 0.006921 | Pregnancy   | Up         | <i>PLD1, CCL2, TACR3, CRYAB, HCLS1, SOCS1, IL1RN, FBP1, BCL2L1, ASL, STAT1, PRSS8, CIQB, FABP3, CA4, SERPINA1</i>                                                                                                            |
| GO:0002253~activation of immune response             | 7          | 0.007101 | Pregnancy   | Up         | <i>CIQA, CFP, CIQB, CFB, SERPING1, C2, CIQC</i>                                                                                                                                                                              |
| GO:0048545~response to steroid hormone stimulus      | 10         | 0.008226 | Pregnancy   | Up         | <i>PRSS8, CIQB, CCL2, TACR3, CRYAB, SOCS1, IL1RN, CA4, SERPINA1, ASL</i>                                                                                                                                                     |
| GO:0008284~positive regulation of cell proliferation | 16         | 0.008488 | Pregnancy   | Up         | <i>COL18A1, NAMPT, CCL2, OSMR, HCLS1, BCL2L1, CD40, STAT1, CXCL10, CD86, ATF3, TNFSF13B, MST1R, SERTAD1, ALOX12, MATK</i>                                                                                                    |
| GO:0006508~proteolysis                               | 31         | 0.008779 | Pregnancy   | Up         | <i>DPP3, UBA7, CIQC, CFP, PRSS8, PSMF1, USP18, CASP4, ISG15, PYCARD, RBCK1, NEDD4L, C2, CASP1, VCPIPI, CFLAR, CFB, SOCS1, UBE2L6, CPXM2, SERPING1, TINAGL1, PSMB9, CIQA, CIQB, MEP1B, UBD, RNF19B, FBXO33, USP25, PRSS22</i> |
| GO:0044106~cellular amine                            | 13         | 0.009755 | Pregnancy   | Up         | <i>DDC, MTHFD2L, YARS, EPAS1, ZNFX1, ALDH5A1,</i>                                                                                                                                                                            |

| Term                                                    | Gene,<br>n | P-value  | Main Effect | Regulation | Genes                                                                                                                                                                                                                        |
|---------------------------------------------------------|------------|----------|-------------|------------|------------------------------------------------------------------------------------------------------------------------------------------------------------------------------------------------------------------------------|
| metabolic process                                       |            |          |             |            | <i>ASL, GSS, WARS, LY6E, ARG2, FABP3, MARS2</i>                                                                                                                                                                              |
| GO:0044248~cellular catabolic process                   | 30         | 0.0106   | Pregnancy   | Up         | <i>PXDN, ENPP3, PNPT1, HEXB, UBA7, CNP, ASL, DNASE1L3, ISG20, PSMF1, USP18, ISG15, SMPDL3B, RBCK1, NEDD4L, VCIPI1, PLD1, AIFM1, ALDH5A1, RNASE6, SOCS1, UBE2L6, CYP26A1, CRAT, PSMB9, DNASE2, UBD, RNF19B, FBXO33, USP25</i> |
| GO:0048584~positive regulation of response to stimulus  | 11         | 0.010776 | Pregnancy   | Up         | <i>C1QA, CFP, C1QB, TNFSF13B, OSMR, CFB, IRF7, FCER1G, SERPING1, C2, C1QC</i>                                                                                                                                                |
| GO:0002684~positive regulation of immune system process | 11         | 0.011397 | Pregnancy   | Up         | <i>C1QA, CFP, C1QB, CD86, TNFSF13B, CFB, FCER1G, SERPING1, CD40, C2, C1QC</i>                                                                                                                                                |
| GO:0006917~induction of apoptosis                       | 13         | 0.013639 | Pregnancy   | Up         | <i>FGD2, CFLAR, AIFM1, NR4A1, STK17A, STAT1, DAXX, CASP4, NUPR1, DDX19B, PYCARD, CASP1, MXI</i>                                                                                                                              |
| GO:0012502~induction of programmed cell death           | 13         | 0.013969 | Pregnancy   | Up         | <i>FGD2, CFLAR, AIFM1, NR4A1, STK17A, STAT1, DAXX, CASP4, NUPR1, DDX19B, PYCARD, CASP1, MXI</i>                                                                                                                              |
| GO:0009308~amine metabolic process                      | 15         | 0.014138 | Pregnancy   | Up         | <i>DDC, MTHFD2L, YARS, EPAS1, ZNFX1, ALDH5A1, HEXB, ASL, GSS, WARS, LY6E, ARG2, FABP3, MARS2, CRYM</i>                                                                                                                       |
| GO:0065008~regulation of biological quality             | 39         | 0.014713 | Pregnancy   | Up         | <i>FGD2, CLDN16, CCL2, TACR3, HEXB, OSGIN1, BCL2L1, SYNGR1, LY6E, MORC3, SERPINA1, AGRN, NEDD4L, SERTAD1, SOAT1, NCDN, SLC12A2, EPAS1,</i>                                                                                   |

| Term                                                                                                                                               | Gene,<br>n | P-value  | Main Effect | Regulation | Genes                                                                                                                                                                              |
|----------------------------------------------------------------------------------------------------------------------------------------------------|------------|----------|-------------|------------|------------------------------------------------------------------------------------------------------------------------------------------------------------------------------------|
|                                                                                                                                                    |            |          |             |            | <i>ALDH5A1, CRYAB, AIFM1, HCLS1, TNFRSF13B, CYP26A1, SERPING1, CD40, PRKCD, SELT, CCL11, DNASE2, CCR7, TNFSF13B, NUPR1, IL20RB, IRF7, CDKN2AIP, IFI6, CRYM, ALOX12</i>             |
| GO:0044255~cellular lipid metabolic process                                                                                                        | 18         | 0.014793 | Pregnancy   | Up         | <i>SOAT1, PLD1, SPTLC2, ALDH5A1, CREM, HEXB, GPLD1, CYP26A1, LYPLA1, CRAT, SERINC2, SMPDL3B, ALOX5AP, FABP3, PLA1A, SLC27A2, SLC27A5, ALOX12</i>                                   |
| GO:0002822~regulation of adaptive immune response based on somatic recombination of immune receptors built from immunoglobulin superfamily domains | 5          | 0.017268 | Pregnancy   | Up         | <i>CD86, TNFSF13B, IL20RB, FCER1G, CD40</i>                                                                                                                                        |
| GO:0002819~regulation of adaptive immune response                                                                                                  | 5          | 0.01834  | Pregnancy   | Up         | <i>CD86, TNFSF13B, IL20RB, FCER1G, CD40</i>                                                                                                                                        |
| GO:0042981~regulation of apoptosis                                                                                                                 | 24         | 0.019813 | Pregnancy   | Up         | <i>FGD2, COL18A1, CFLAR, IFIH1, BCL2L14, CCL2, AIFM1, CRYAB, ANXA1, NR4A1, CDH1, STK17A, BCL2L1, STAT1, DAXX, CASP4, TNFSF13B, NUPR1, DDX19B, PYCARD, CASP1, MX1, IFI6, ALOX12</i> |
| GO:0043067~regulation of programmed cell death                                                                                                     | 24         | 0.021739 | Pregnancy   | Up         | <i>FGD2, COL18A1, CFLAR, IFIH1, BCL2L14, CCL2, AIFM1, CRYAB, ANXA1, NR4A1, CDH1, STK17A, BCL2L1, STAT1, DAXX, CASP4, TNFSF13B, NUPR1, DDX19B, PYCARD, CASP1, MX1, IFI6, ALOX12</i> |

| Term                                                            | Gene,<br>n | P-value  | Main Effect | Regulation | Genes                                                                                                                                                                              |
|-----------------------------------------------------------------|------------|----------|-------------|------------|------------------------------------------------------------------------------------------------------------------------------------------------------------------------------------|
| GO:0043434~response to peptide hormone stimulus                 | 8          | 0.021846 | Pregnancy   | Up         | <i>PRSS8, PLD1, SOCS1, FABP3, FBP1, BCL2L1, STAT1, ASL</i>                                                                                                                         |
| GO:0070206~protein trimerization                                | 3          | 0.022237 | Pregnancy   | Up         | <i>ALOX5AP, TRIM6, TRIM6-TRIM34, TRIM21</i>                                                                                                                                        |
| GO:0010941~regulation of cell death                             | 24         | 0.02281  | Pregnancy   | Up         | <i>FGD2, COL18A1, CFLAR, IFIH1, BCL2L14, CCL2, AIFM1, CRYAB, ANXA1, NR4A1, CDH1, STK17A, BCL2L1, STAT1, DAXX, CASP4, TNFSF13B, NUPR1, DDX19B, PYCARD, CASP1, MX1, IFI6, ALOX12</i> |
| GO:0002682~regulation of immune system process                  | 14         | 0.022926 | Pregnancy   | Up         | <i>CFB, TNFRSF13B, SERPING1, CD40, C1QC, CFP, C1QA, DDX58, C1QB, CD86, TNFSF13B, IL20RB, FCER1G, C2</i>                                                                            |
| GO:0001819~positive regulation of cytokine production           | 6          | 0.02348  | Pregnancy   | Up         | <i>DDX58, IL20RB, PYCARD, FCER1G, CD40, CASP1</i>                                                                                                                                  |
| GO:0043065~positive regulation of apoptosis                     | 15         | 0.024641 | Pregnancy   | Up         | <i>COL18A1, FGD2, CFLAR, AIFM1, NR4A1, BCL2L1, STK17A, STAT1, DAXX, CASP4, NUPR1, DDX19B, PYCARD, CASP1, MX1</i>                                                                   |
| GO:0043068~positive regulation of programmed cell death         | 15         | 0.025969 | Pregnancy   | Up         | <i>COL18A1, FGD2, CFLAR, AIFM1, NR4A1, BCL2L1, STK17A, STAT1, DAXX, CASP4, NUPR1, DDX19B, PYCARD, CASP1, MX1</i>                                                                   |
| GO:0006519~cellular amino acid and derivative metabolic process | 13         | 0.026609 | Pregnancy   | Up         | <i>DDC, MTHFD2L, YARS, EPAS1, ZNFX1, ALDH5A1, ASL, GSS, WARS, LY6E, ARG2, FABP3, MARS2</i>                                                                                         |

| Term                                                                | Gene,<br>n | P-value  | Main Effect | Regulation | Genes                                                                                                                                                                                                                                                                                                                               |
|---------------------------------------------------------------------|------------|----------|-------------|------------|-------------------------------------------------------------------------------------------------------------------------------------------------------------------------------------------------------------------------------------------------------------------------------------------------------------------------------------|
| GO:0010942~positive regulation of cell death                        | 15         | 0.027064 | Pregnancy   | Up         | <i>COL18A1, FGD2, CFLAR, AIFM1, NR4A1, BCL2L1, STK17A, STAT1, DAXX, CASP4, NUPR1, DDX19B, PYCARD, CASP1, MX1</i>                                                                                                                                                                                                                    |
| GO:0006631~fatty acid metabolic process                             | 9          | 0.027549 | Pregnancy   | Up         | <i>ALDH5A1, CREM, ALOX5AP, FABP3, LYPLA1, CRAT, SLC27A2, SLC27A5, ALOX12</i>                                                                                                                                                                                                                                                        |
| GO:0006957~complement activation, alternative pathway               | 3          | 0.029235 | Pregnancy   | Up         | <i>CFP, CFB, C2</i>                                                                                                                                                                                                                                                                                                                 |
| GO:0051188~cofactor biosynthetic process                            | 6          | 0.03115  | Pregnancy   | Up         | <i>GSS, NAMPT, ALAS1, MTHFD2L, PDXK, DLAT</i>                                                                                                                                                                                                                                                                                       |
| GO:0043123~positive regulation of I-kappaB kinase/NF-kappaB cascade | 6          | 0.03115  | Pregnancy   | Up         | <i>TRIM38, CFLAR, SHISA5, CD40, CASP1, LGALS9</i>                                                                                                                                                                                                                                                                                   |
| GO:0048522~positive regulation of cellular process                  | 45         | 0.032215 | Pregnancy   | Up         | <i>FGD2, NAMPT, MSR1, CCL2, OSMR, ABLIM3, BCL2L1, STK17A, DAXX, CXCL10, PSMF1, CASP4, DDX19B, SHISA5, PYCARD, AGRN, NEDD4L, PTX3, MX1, CASP1, BOC, SERTAD1, MATK, SOAT1, COL18A1, CFLAR, PLD1, EPAS1, AIFM1, HCLS1, NR4A1, CD40, STAT1, LGALS9, PSMB9, TRIM38, CD86, ATF3, TNFSF13B, NUPR1, IRF6, CDKN2AIP, IRF1, MST1R, ALOX12</i> |
| GO:0048872~homeostasis of number of cells                           | 6          | 0.034866 | Pregnancy   | Up         | <i>DNASE2, TNFSF13B, IL20RB, EPAS1, HCLS1, TNFRSF13B</i>                                                                                                                                                                                                                                                                            |
| GO:0009108~coenzyme                                                 | 5          | 0.036065 | Pregnancy   | Up         | <i>GSS, NAMPT, MTHFD2L, PDXK, DLAT</i>                                                                                                                                                                                                                                                                                              |

| Term                                                       | Gene,<br>n | P-value  | Main Effect | Regulation | Genes                                                                                                                                                                                                                                     |
|------------------------------------------------------------|------------|----------|-------------|------------|-------------------------------------------------------------------------------------------------------------------------------------------------------------------------------------------------------------------------------------------|
| biosynthetic process                                       |            |          |             |            |                                                                                                                                                                                                                                           |
| GO:0019221~cytokine-mediated signaling pathway             | 5          | 0.037728 | Pregnancy   | Up         | <i>CCL2, SOCS1, PYCARD, RQCD1, STAT1</i>                                                                                                                                                                                                  |
| GO:0043122~regulation of I-kappaB kinase/NF-kappaB cascade | 6          | 0.044565 | Pregnancy   | Up         | <i>TRIM38, CFLAR, SHISA5, CD40, CASP1, LGALS9</i>                                                                                                                                                                                         |
| GO:0009056~catabolic process                               | 32         | 0.044859 | Pregnancy   | Up         | <i>PXDN, ENPP3, PNPT1, HEXB, UBA7, CNP, ASL, DNASE1L3, ISG20, PSMF1, USP18, ISG15, SMPDL3B, PLA1A, RBCK1, NEDD4L, VCIPI1, PLD1, ALDH5A1, AIFM1, RNASE6, SOCS1, UBE2L6, CYP26A1, CRAT, DLAT, PSMB9, DNASE2, UBD, RNF19B, FBXO33, USP25</i> |
| GO:0001817~regulation of cytokine production               | 8          | 0.046188 | Pregnancy   | Up         | <i>DDX58, CD86, IL20RB, PYCARD, IRF1, FCER1G, CD40, CASP1</i>                                                                                                                                                                             |
| GO:0006665~sphingolipid metabolic process                  | 5          | 0.046695 | Pregnancy   | Up         | <i>SMPDL3B, SPTLC2, ALDH5A1, CREM, HEXB</i>                                                                                                                                                                                               |
| GO:0006066~alcohol metabolic process                       | 14         | 0.048173 | Pregnancy   | Up         | <i>SOAT1, DDC, EPAS1, CRYAB, ALDH5A1, CREM, HEXB, FBP1, DLAT, PMVK, PCK2, ATF3, LY6E, FABP3</i>                                                                                                                                           |
| GO:0006418~tRNA aminoacylation for protein translation     | 4          | 0.050081 | Pregnancy   | Up         | <i>WARS, YARS, ZNFX1, MARS2</i>                                                                                                                                                                                                           |
| GO:0043039~tRNA                                            | 4          | 0.050081 | Pregnancy   | Up         | <i>WARS, YARS, ZNFX1, MARS2</i>                                                                                                                                                                                                           |

| Term                                                 | Gene,<br>n | P-value  | Main Effect | Regulation | Genes                                                                                                                                                                                                                                                                                                                         |
|------------------------------------------------------|------------|----------|-------------|------------|-------------------------------------------------------------------------------------------------------------------------------------------------------------------------------------------------------------------------------------------------------------------------------------------------------------------------------|
| aminoacylation                                       |            |          |             |            |                                                                                                                                                                                                                                                                                                                               |
| GO:0043038~amino acid activation                     | 4          | 0.050081 | Pregnancy   | Up         | WARS, YARS, ZNFX1, MARS2                                                                                                                                                                                                                                                                                                      |
| GO:0032496~response to lipopolysaccharide            | 5          | 0.050585 | Pregnancy   | Up         | CCL2, SOCS1, IRF3, SERPINA1, STAT1                                                                                                                                                                                                                                                                                            |
| GO:0048519~negative regulation of biological process | 43         | 0.052381 | Pregnancy   | Up         | CCL2, SLC15A1, IFITM1, AIF1, OSGIN1, ABHD2, BCL2L1, DAXX, C1QC, WARS, PSMF1, MOV10, MORC3, ARG2, NEDD4L, SERTAD1, DNAJC1, COL18A1, CFLAR, CRYAB, SOCS1, TNFRSF13B, ANXA1, CYP26A1, SERPING1, RGS16, PRKCD, PSMB9, DKK1, TNFSF13B, IL20RB, NUPR1, IRF6, IRF7, CDKN2AIP, IRF8, FABP3, EIF2AK2, MAD2L2, IFI6, CRYM, ALOX12, ADAR |
| GO:0006520~cellular amino acid metabolic process     | 9          | 0.053056 | Pregnancy   | Up         | GSS, WARS, YARS, MTHFD2L, ALDH5A1, ZNFX1, ARG2, MARS2, ASL                                                                                                                                                                                                                                                                    |
| GO:0007030~Golgi organization                        | 3          | 0.054491 | Pregnancy   | Up         | ATL3, OPTN, VCIPI1                                                                                                                                                                                                                                                                                                            |
| GO:0043281~regulation of caspase activity            | 5          | 0.054648 | Pregnancy   | Up         | PYCARD, NR4A1, CDH1, STAT1, IFI6                                                                                                                                                                                                                                                                                              |
| GO:0034097~response to cytokine stimulus             | 5          | 0.054648 | Pregnancy   | Up         | OSMR, SOCS1, SERPINA1, BCL2L1, STAT1                                                                                                                                                                                                                                                                                          |
| GO:0006644~phospholipid metabolic process            | 8          | 0.057396 | Pregnancy   | Up         | SERINC2, PLD1, SMPDL3B, ALDH5A1, HEXB, GPLD1, FABP3, PLA1A                                                                                                                                                                                                                                                                    |

| Term                                                     | Gene,<br>n | P-value  | Main Effect | Regulation | Genes                                                                                                                                                                        |
|----------------------------------------------------------|------------|----------|-------------|------------|------------------------------------------------------------------------------------------------------------------------------------------------------------------------------|
| GO:0006643~membrane lipid metabolic process              | 5          | 0.058882 | Pregnancy   | Up         | <i>SMPDL3B, SPTLC2, ALDH5A1, CREM, HEXB</i>                                                                                                                                  |
| GO:0006006~glucose metabolic process                     | 7          | 0.059253 | Pregnancy   | Up         | <i>ATF3, ALDH5A1, CRYAB, CREM, FBP1, DLAT, PCK2</i>                                                                                                                          |
| GO:0052548~regulation of endopeptidase activity          | 5          | 0.061064 | Pregnancy   | Up         | <i>PYCARD, NR4A1, CDH1, STAT1, IFI6</i>                                                                                                                                      |
| GO:0009617~response to bacterium                         | 8          | 0.061127 | Pregnancy   | Up         | <i>CFP, PLD1, CCL2, SOCS1, IRF3, SERPINA1, STAT1, S100A12</i>                                                                                                                |
| GO:0007626~locomotory behavior                           | 10         | 0.061199 | Pregnancy   | Up         | <i>CCL11, CCR7, PLD1, CCL2, CXCL2, HEXB, CCL8, CNP, ASL, CXCL10</i>                                                                                                          |
| GO:0015718~monocarboxylic acid transport                 | 4          | 0.061404 | Pregnancy   | Up         | <i>SLC16A1, ANXA1, ABCC3, FABP3</i>                                                                                                                                          |
| GO:0006366~transcription from RNA polymerase II promoter | 9          | 0.062439 | Pregnancy   | Up         | <i>IRF9, NMI, EPAS1, IRF7, IRF1, IRF3, STAT1, GTF2B, NFATC1</i>                                                                                                              |
| GO:0006650~glycerophospho lipid metabolic process        | 6          | 0.062771 | Pregnancy   | Up         | <i>SERINC2, PLD1, ALDH5A1, GPLD1, FABP3, PLA1A</i>                                                                                                                           |
| GO:0006629~lipid metabolic process                       | 22         | 0.063404 | Pregnancy   | Up         | <i>SOAT1, PLD1, SPTLC2, ALDH5A1, CREM, HEXB, GPLD1, ANXA1, CYP26A1, LYPLA1, CRAT, ACSS2, PMVK, SERINC2, STARD5, SMPDL3B, ALOX5AP, FABP3, PLA1A, SLC27A2, SLC27A5, ALOX12</i> |



| Term                                                | Gene,<br>n | P-value  | Main Effect | Regulation | Genes                                                                                                                                                    |
|-----------------------------------------------------|------------|----------|-------------|------------|----------------------------------------------------------------------------------------------------------------------------------------------------------|
| GO:0044265~cellular macromolecule catabolic process | 20         | 0.065124 | Pregnancy   | Up         | <i>AIFM1, PNPT1, SOCS1, RNASE6, UBA7, UBE2L6, DNASE1L3, PSMB9, ISG20, DNASE2, PSMF1, USP18, ISG15, UBD, RBCK1, NEDD4L, FBXO33, RNF19B, USP25, VCPIP1</i> |
| GO:0031960~response to corticosteroid stimulus      | 5          | 0.06786  | Pregnancy   | Up         | <i>PRSS8, C1QB, CCL2, IL1RN, ASL</i>                                                                                                                     |
| GO:0002237~response to molecule of bacterial origin | 5          | 0.070209 | Pregnancy   | Up         | <i>CCL2, SOCS1, IRF3, SERPINA1, STAT1</i>                                                                                                                |
| GO:0052547~regulation of peptidase activity         | 5          | 0.070209 | Pregnancy   | Up         | <i>PYCARD, NR4A1, CDH1, STAT1, IFI6</i>                                                                                                                  |
| GO:0045351~type I interferon biosynthetic process   | 2          | 0.070331 | Pregnancy   | Up         | <i>IRF9, IRF3</i>                                                                                                                                        |
| GO:0032606~type I interferon production             | 2          | 0.070331 | Pregnancy   | Up         | <i>IRF9, IRF3</i>                                                                                                                                        |
| GO:0006935~chemotaxis                               | 7          | 0.070351 | Pregnancy   | Up         | <i>CCL11, CCR7, PLD1, CCL2, CXCL2, CCL8, CXCL10</i>                                                                                                      |
| GO:0042330~taxis                                    | 7          | 0.070351 | Pregnancy   | Up         | <i>CCL11, CCR7, PLD1, CCL2, CXCL2, CCL8, CXCL10</i>                                                                                                      |
| GO:0019637~organophosphate metabolic process        | 8          | 0.0711   | Pregnancy   | Up         | <i>SERINC2, PLD1, SMPDL3B, ALDH5A1, HEXB, GPLD1, FABP3, PLA1A</i>                                                                                        |
| GO:0032355~response to estradiol stimulus           | 4          | 0.073806 | Pregnancy   | Up         | <i>TACR3, CRYAB, SOCS1, SERPINA1</i>                                                                                                                     |

| Term                                                               | Gene,<br>n | P-value  | Main Effect | Regulation | Genes                                                                 |
|--------------------------------------------------------------------|------------|----------|-------------|------------|-----------------------------------------------------------------------|
| GO:0006094~gluconeogenesis                                         | 3          | 0.0743   | Pregnancy   | Up         | <i>ATF3, FBP1, PCK2</i>                                               |
| GO:0051240~positive regulation of multicellular organismal process | 9          | 0.075569 | Pregnancy   | Up         | <i>DDX58, CCL2, IL20RB, TACR3, PYCARD, FCER1G, CD40, CASP1, FOXS1</i> |
| GO:0010035~response to inorganic substance                         | 8          | 0.078755 | Pregnancy   | Up         | <i>GSS, PXDN, CRYAB, DDX19B, SERPINA1, NEDD4L, BCL2L1, STAT1</i>      |
| GO:0006687~glycosphingolipid metabolic process                     | 3          | 0.079563 | Pregnancy   | Up         | <i>ALDH5A1, CREM, HEXB</i>                                            |
| GO:0006916~anti-apoptosis                                          | 8          | 0.080105 | Pregnancy   | Up         | <i>CFLAR, CCL2, TNFSF13B, CRYAB, ANXA1, BCL2L1, IFI6, ALOX12</i>      |
| GO:0042542~response to hydrogen peroxide                           | 4          | 0.080392 | Pregnancy   | Up         | <i>PXDN, CRYAB, BCL2L1, STAT1</i>                                     |
| GO:0010740~positive regulation of protein kinase cascade           | 7          | 0.082559 | Pregnancy   | Up         | <i>TRIM38, CFLAR, HCLS1, SHISA5, CD40, CASP1, LGALS9</i>              |
| GO:0010627~regulation of protein kinase cascade                    | 9          | 0.083304 | Pregnancy   | Up         | <i>TRIM38, CFLAR, HCLS1, SOCS1, SHISA5, CD40, CASP1, DAXX, LGALS9</i> |
| GO:0002883~regulation of hypersensitivity                          | 2          | 0.08713  | Pregnancy   | Up         | <i>IL20RB, FCER1G</i>                                                 |
| GO:0002864~regulation of acute inflammatory response               | 2          | 0.08713  | Pregnancy   | Up         | <i>IL20RB, FCER1G</i>                                                 |

| Term                                          | Gene,<br>n | P-value  | Main Effect | Regulation | Genes                                                                                                                                                                                                                                                            |
|-----------------------------------------------|------------|----------|-------------|------------|------------------------------------------------------------------------------------------------------------------------------------------------------------------------------------------------------------------------------------------------------------------|
| to antigenic stimulus                         |            |          |             |            |                                                                                                                                                                                                                                                                  |
| GO:0050708~regulation of protein secretion    | 4          | 0.087224 | Pregnancy   | Up         | <i>PYCARD, CD40, CASP1, DNAJC1</i>                                                                                                                                                                                                                               |
| GO:0030888~regulation of B cell proliferation | 3          | 0.09042  | Pregnancy   | Up         | <i>TNFSF13B, TNFRSF13B, CD40</i>                                                                                                                                                                                                                                 |
| GO:0051260~protein homooligomerization        | 5          | 0.093174 | Pregnancy   | Up         | <i>ALDH5A1, CRYAB, ALOX5AP, ATL3, CDH1</i>                                                                                                                                                                                                                       |
| GO:0006308~DNA catabolic process              | 4          | 0.094291 | Pregnancy   | Up         | <i>DNASE2, AIFM1, DNASE1L3, ISG20</i>                                                                                                                                                                                                                            |
| GO:0001666~response to hypoxia                | 6          | 0.095676 | Pregnancy   | Up         | <i>CCL2, EPAS1, SERPINA1, BCL2L1, CASP1, ASL</i>                                                                                                                                                                                                                 |
| GO:0051259~protein oligomerization            | 7          | 0.095788 | Pregnancy   | Up         | <i>ALDH5A1, CRYAB, ALOX5AP, TRIM6, ATL3, CDH1, TRIM6-TRIM34, TRIM21</i>                                                                                                                                                                                          |
| GO:0042493~response to drug                   | 8          | 0.097672 | Pregnancy   | Up         | <i>PRSS8, COL18A1, CCL2, SOCS1, FABP3, CA4, CDH1, STAT1</i>                                                                                                                                                                                                      |
|                                               |            |          |             |            |                                                                                                                                                                                                                                                                  |
| GO:0007155~cell adhesion                      | 53         | 1.44E-13 | Pregnancy   | Down       | <i>MTSS1, CADM3, IGFBP7, NPNT, CLDN5, PCDHGA8, WISP2, CD44, ROBO1, COL12A1, SPON2, COL11A1, SPON1, TYRO3, SIGLEC10, PTPRS, CDK5, PCDHGB4, AMIGO1, HES1, PGM5, VCAN, SGCE, TGFB1I1, JAM2, MFAP4, DST, MIA, EMCN, COL3A1, CLDN10, CDH2, PCDHGC3, ISLR, SEMA5A,</i> |

| Term                                | Gene,<br>n | P-value  | Main Effect | Regulation | Genes                                                                                                                                                                                                                                                                                                                                                                                                                                                                                                                                                                                                                                                                                                                                                         |
|-------------------------------------|------------|----------|-------------|------------|---------------------------------------------------------------------------------------------------------------------------------------------------------------------------------------------------------------------------------------------------------------------------------------------------------------------------------------------------------------------------------------------------------------------------------------------------------------------------------------------------------------------------------------------------------------------------------------------------------------------------------------------------------------------------------------------------------------------------------------------------------------|
|                                     |            |          |             |            | <i>COL27A1, TEK, TNXB, GMDS, COL13A1, HSPG2, NID1, NLGN3, COL5A3, MCAM, CDH13, LAMA4, STAB1, FBLN5, PECAM1, ITGA7, FEZ1, CDH11</i>                                                                                                                                                                                                                                                                                                                                                                                                                                                                                                                                                                                                                            |
| GO:0022610~biological<br>adhesion   | 53         | 1.52E-13 | Pregnancy   | Down       | <i>MTSS1, CADM3, IGFBP7, NPNT, CLDN5, PCDHGA8, WISP2, CD44, ROBO1, COL12A1, SPON2, COL11A1, SPON1, TYRO3, SIGLEC10, PTPRS, CDK5, PCDHGB4, AMIGO1, HES1, PGM5, VCAN, SGCE, TGFB111, JAM2, MFAP4, DST, MIA, EMCN, COL3A1, CLDN10, CDH2, PCDHGC3, ISLR, SEMA5A, COL27A1, TEK, TNXB, GMDS, COL13A1, HSPG2, NID1, NLGN3, COL5A3, MCAM, CDH13, LAMA4, STAB1, FBLN5, PECAM1, ITGA7, FEZ1, CDH11</i>                                                                                                                                                                                                                                                                                                                                                                  |
| GO:0032502~developmental<br>process | 120        | 1.38E-08 | Pregnancy   | Down       | <i>EDN3, TSPAN2, GRIK1, EFNA2, JAG2, JAG1, CITED1, TGFB2, OLFML3, CD44, SERPINE2, CDKN2C, ROBO1, SMARCD3, ROBO4, COL12A1, PATZ1, ASPH, SPON2, SIX5, KRT10, PRELP, HES1, SERPINF1, TCFL5, GTF2IRD1, VEGFA, COL1A2, EFNA5, COL1A1, TGFB111, DST, EID1, EMCN, MFNG, MRAS, TIMP4, ELK3, MEIS1, SEMA5A, PEG10, TUBB, AHNAK2, CLASP2, PPP2R2B, ANGPTL2, BMP2, SPHK2, MSTN, ZNF521, MYOZ1, MCAM, ANKH, CDKN1C, LAMA4, HOXB7, SFRP2, ITGA7, NOTCH4, NTRK2, FABP7, IGFBP7, NPNT, TTLL3, EDNRA, LBH, OSR2, MKKS, SOX18, COL11A1, KCNMA1, EGFL7, LDB1, LDB2, ARHGAP24, CDK5, MMP11, AMIGO1, CCND1, LCK, VCAN, SGCE, KLHL10, IRX3, UNG, FHL1, COL3A1, OXTR, CDH2, KIT, MLF1, IGSF10, ALDH1A2, CRISPLD2, DISP1, PPP3CA, DCLK1, MYOC, MLLT3, NES, COL13A1, MSH2, MAP1B,</i> |

| Term                                            | Gene,<br>n | P-value  | Main Effect | Regulation | Genes                                                                                                                                                                                                                                                                                                                                                                                                                                                                                                                                                                                                                                                                                                                                                                                                                    |
|-------------------------------------------------|------------|----------|-------------|------------|--------------------------------------------------------------------------------------------------------------------------------------------------------------------------------------------------------------------------------------------------------------------------------------------------------------------------------------------------------------------------------------------------------------------------------------------------------------------------------------------------------------------------------------------------------------------------------------------------------------------------------------------------------------------------------------------------------------------------------------------------------------------------------------------------------------------------|
|                                                 |            |          |             |            | <i>HSPG2, IGF1, DPYSL3, NID1, DPYSL2, COL5A3, SNAI2, RCAN2, ZNF358, WNT2B, CDH13, ICK, FYN, MPPED2, GAMT, FEZ1, CDH11</i>                                                                                                                                                                                                                                                                                                                                                                                                                                                                                                                                                                                                                                                                                                |
| GO:0007275~multicellular organismal development | 112        | 1.46E-08 | Pregnancy   | Down       | <i>EDN3, GRIK1, TSPAN2, EFNA2, JAG2, JAG1, CITED1, TGFB2, OLFML3, CD44, SERPINE2, CDKN2C, ROBO1, SMARCD3, ROBO4, COL12A1, PATZ1, ASPH, SPON2, SIX5, KRT10, PRELP, HES1, SERPINF1, TCFL5, GTF2IRD1, VEGFA, COL1A2, EFNA5, COL1A1, TGFB111, DST, EMCN, MFNG, MRAS, TIMP4, ELK3, MEIS1, SEMA5A, TUBB, AHNAK2, ANGPTL2, BMP2, SPHK2, MSTN, ZNF521, ANKH, CDKN1C, LAMA4, HOXB7, SFRP2, ITGA7, NOTCH4, NTRK2, FABP7, IGFBP7, NPNT, EDNRA, LBH, OSR2, MKKS, SOX18, COL11A1, KCNMA1, EGFL7, LDB1, LDB2, ARHGAP24, CDK5, MMP11, AMIGO1, CCND1, LCK, SGCE, VCAN, KLHL10, IRX3, UNG, FHL1, COL3A1, OXTR, CDH2, KIT, MLF1, IGSF10, ALDH1A2, CRISPLD2, DISP1, PPP3CA, DCLK1, MLLT3, NES, COL13A1, MSH2, MAP1B, HSPG2, IGF1, DPYSL3, NID1, DPYSL2, COL5A3, SNAI2, RCAN2, ZNF358, WNT2B, CDH13, ICK, FYN, MPPED2, GAMT, CDH11, FEZ1</i> |
| GO:0048856~anatomical structure development     | 102        | 1.86E-08 | Pregnancy   | Down       | <i>EDN3, GRIK1, TSPAN2, EFNA2, JAG2, JAG1, CITED1, TGFB2, CD44, SERPINE2, ROBO1, SMARCD3, CDKN2C, ROBO4, COL12A1, PATZ1, ASPH, SPON2, SIX5, KRT10, PRELP, HES1, SERPINF1, VEGFA, COL1A2, EFNA5, COL1A1, TGFB111, DST, EMCN, MRAS, TIMP4, ELK3, SEMA5A, TUBB, AHNAK2, CLASP2, BMP2, SPHK2, MSTN, MYOZ1, MCAM,</i>                                                                                                                                                                                                                                                                                                                                                                                                                                                                                                         |

| Term                                          | Gene,<br>n | P-value  | Main Effect | Regulation | Genes                                                                                                                                                                                                                                                                                                                                                                                                                                  |
|-----------------------------------------------|------------|----------|-------------|------------|----------------------------------------------------------------------------------------------------------------------------------------------------------------------------------------------------------------------------------------------------------------------------------------------------------------------------------------------------------------------------------------------------------------------------------------|
|                                               |            |          |             |            | <i>ANKH, CDKN1C, LAMA4, HOXB7, SFRP2, NOTCH4, NTRK2, ITGA7, FABP7, TTLL3, EDNRA, OSR2, MKKS, SOX18, COL11A1, KCNMA1, EGFL7, LDB1, ARHGAP24, CDK5, AMIGO1, CCND1, LCK, SGCE, VCAN, KLHL10, IRX3, UNG, FHL1, COL3A1, OXTR, CDH2, KIT, MLF1, IGSF10, ALDH1A2, CRISPLD2, PPP3CA, MYOC, DCLK1, NES, COL13A1, MSH2, MAP1B, HSPG2, IGF1, NID1, DPYSL3, DPYSL2, COL5A3, SNAI2, RCAN2, ZNF358, WNT2B, CDH13, FYN, MPPED2, GAMT, CDH11, FEZ1</i> |
| GO:0001568~blood vessel development           | 24         | 1.93E-08 | Pregnancy   | Down       | <i>EMCN, SPHK2, EGFL7, COL3A1, ELK3, CDH2, JAG1, ARHGAP24, CITED1, TGFB2, SEMA5A, EDNRA, CDH13, LAMA4, CD44, ROBO1, VEGFA, ITGA7, NOTCH4, NTRK2, COL1A2, ROBO4, SOX18, COL1A1</i>                                                                                                                                                                                                                                                      |
| GO:0030198~extracellular matrix organization  | 16         | 2.12E-08 | Pregnancy   | Down       | <i>MIA, TNXB, COL3A1, HSPG2, CCDC80, NID1, COL5A3, TGFB2, EGFLAM, CRISPLD2, FBLN5, COL1A2, COL12A1, COL1A1, VWA1, COL11A1</i>                                                                                                                                                                                                                                                                                                          |
| GO:0001944~vasculature development            | 24         | 3.02E-08 | Pregnancy   | Down       | <i>EMCN, SPHK2, EGFL7, COL3A1, ELK3, CDH2, JAG1, ARHGAP24, CITED1, TGFB2, SEMA5A, EDNRA, CDH13, LAMA4, CD44, ROBO1, VEGFA, ITGA7, NOTCH4, NTRK2, COL1A2, ROBO4, SOX18, COL1A1</i>                                                                                                                                                                                                                                                      |
| GO:0009653~anatomical structure morphogenesis | 60         | 4.25E-08 | Pregnancy   | Down       | <i>EFNA2, JAG2, JAG1, CITED1, TGFB2, TTLL3, EDNRA, OSR2, CD44, SMARCD3, ROBO1, ROBO4, MKKS, SOX18, ASPH, SPON2, COL11A1, EGFL7, LDB1, ARHGAP24, CDK5, AMIGO1, HES1, CCND1, VEGFA, COL1A2, VCAN, EFNA5, COL1A1, TGFB111, KLHL10, DST, EMCN, FHL1, CDH2, ELK3, SEMA5A,</i>                                                                                                                                                               |

| Term                                            | Gene,<br>n | P-value  | Main Effect | Regulation | Genes                                                                                                                                                                                                                                                                                                                                                                                                                                                                                                                                                                                                                                                                                      |
|-------------------------------------------------|------------|----------|-------------|------------|--------------------------------------------------------------------------------------------------------------------------------------------------------------------------------------------------------------------------------------------------------------------------------------------------------------------------------------------------------------------------------------------------------------------------------------------------------------------------------------------------------------------------------------------------------------------------------------------------------------------------------------------------------------------------------------------|
|                                                 |            |          |             |            | <i>IGSF10, ALDH1A2, CLASP2, DCLK1, MYOC, BMP2, COL13A1, MAP1B, HSPG2, IGF1, MSTN, MYOZ1, MCAM, ZNF358, WNT2B, CDH13, HOXB7, SFRP2, ITGA7, NTRK2, NOTCH4, GAMT, FEZ1</i>                                                                                                                                                                                                                                                                                                                                                                                                                                                                                                                    |
| GO:0043062~extracellular structure organization | 19         | 5.93E-08 | Pregnancy   | Down       | <i>MIA, TNXB, COL3A1, MAP1B, HSPG2, CCDC80, NLGN3, NID1, CDH2, COL5A3, TGFB2, EGFLAM, CRISPLD2, FBLN5, COL1A2, COL12A1, COL1A1, VWA1, COL11A1</i>                                                                                                                                                                                                                                                                                                                                                                                                                                                                                                                                          |
| GO:0048731~system development                   | 94         | 9.52E-08 | Pregnancy   | Down       | <i>EDN3, GRIK1, TSPAN2, EFNA2, JAG2, JAG1, CITED1, TGFB2, EDNRA, OSR2, SERPINE2, CD44, CDKN2C, SMARCD3, ROBO1, ROBO4, MKKS, COL12A1, PATZ1, SOX18, SPON2, COL11A1, KCNMA1, EGFL7, LDB1, SIX5, KRT10, ARHGAP24, CDK5, PRELP, AMIGO1, HES1, CCND1, SERPINF1, LCK, VEGFA, COL1A2, EFNA5, SGCE, VCAN, KLHL10, COL1A1, TGFB111, DST, IRX3, EMCN, UNG, MRAS, FHL1, COL3A1, OXTR, TIMP4, CDH2, ELK3, KIT, MLF1, IGSF10, SEMA5A, ALDH1A2, TUBB, CRISPLD2, AHNAK2, PPP3CA, DCLK1, BMP2, NES, SPHK2, MSH2, COL13A1, MAP1B, HSPG2, IGF1, MSTN, DPYSL3, NID1, DPYSL2, SNAI2, COL5A3, RCAN2, ANKH, ZNF358, CDKN1C, CDH13, LAMA4, HOXB7, FYN, ITGA7, NOTCH4, NTRK2, MPPED2, GAMT, FABP7, CDH11, FEZ1</i> |
| GO:0030154~cell differentiation                 | 73         | 1.10E-07 | Pregnancy   | Down       | <i>EDN3, TSPAN2, EFNA2, NPNT, JAG2, JAG1, CITED1, TGFB2, EDNRA, SERPINE2, CD44, CDKN2C, SMARCD3, ROBO1, ROBO4, MKKS, PATZ1, SOX18, SPON2, COL11A1, KCNMA1, EGFL7, LDB1, SIX5,</i>                                                                                                                                                                                                                                                                                                                                                                                                                                                                                                          |

| Term                                      | Gene,<br>n | P-value  | Main Effect | Regulation | Genes                                                                                                                                                                                                                                                                                                                                                                                                                                                                                                                                                       |
|-------------------------------------------|------------|----------|-------------|------------|-------------------------------------------------------------------------------------------------------------------------------------------------------------------------------------------------------------------------------------------------------------------------------------------------------------------------------------------------------------------------------------------------------------------------------------------------------------------------------------------------------------------------------------------------------------|
|                                           |            |          |             |            | <i>ARHGAP24, CDK5, AMIGO1, HES1, CCND1, SERPINF1, TCFL5, LCK, VEGFA, EFNA5, VCAN, COL1A1, TGFB111, KLHL10, DST, IRX3, EID1, FHL1, CDH2, KIT, MLF1, IGSF10, SEMA5A, ALDH1A2, PEG10, TUBB, AHNAK2, PPP3CA, PPP2R2B, DCLK1, BMP2, MSH2, COL13A1, MAP1B, HSPG2, IGF1, MYOZ1, ZNF521, DPYSL2, ZNF358, CDKN1C, LAMA4, HOXB7, SFRP2, FYN, NTRK2, NOTCH4, FABP7, FEZ1</i>                                                                                                                                                                                           |
| GO:0048869~cellular developmental process | 75         | 1.22E-07 | Pregnancy   | Down       | <i>EDN3, TSPAN2, EFNA2, NPNT, JAG2, JAG1, CITED1, TGFB2, TTLL3, EDNRA, SERPINE2, CD44, CDKN2C, SMARCD3, ROBO1, ROBO4, MKKS, PATZ1, SOX18, SPON2, COL11A1, KCNMA1, EGFL7, LDB1, SIX5, ARHGAP24, CDK5, AMIGO1, HES1, CCND1, SERPINF1, TCFL5, LCK, VEGFA, EFNA5, VCAN, KLHL10, COL1A1, TGFB111, DST, IRX3, EID1, FHL1, CDH2, KIT, MLF1, IGSF10, SEMA5A, ALDH1A2, PEG10, TUBB, AHNAK2, PPP3CA, CLASP2, PPP2R2B, DCLK1, BMP2, MSH2, COL13A1, MAP1B, HSPG2, IGF1, MYOZ1, ZNF521, DPYSL2, ZNF358, CDKN1C, LAMA4, HOXB7, SFRP2, FYN, NTRK2, NOTCH4, FABP7, FEZ1</i> |
| GO:0022008~neurogenesis                   | 35         | 2.29E-06 | Pregnancy   | Down       | <i>IRX3, EDN3, TSPAN2, EFNA2, JAG2, KIT, JAG1, CDH2, TGFB2, SEMA5A, ALDH1A2, TUBB, CD44, ROBO1, CDKN2C, SPON2, DCLK1, KCNMA1, BMP2, LDB1, MAP1B, IGF1, CDK5, HES1, CDKN1C, AMIGO1, SERPINF1, FYN, VEGFA, NTRK2, EFNA5, VCAN, FABP7, DST, FEZ1</i>                                                                                                                                                                                                                                                                                                           |



| Term                                        | Gene,<br>n | P-value  | Main Effect | Regulation | Genes                                                                                                                                                                                                                                                                                                                                                                                                                                                                                                                                                                                                                                                                                                                                                                                                                                                                                                                                                                                                                            |
|---------------------------------------------|------------|----------|-------------|------------|----------------------------------------------------------------------------------------------------------------------------------------------------------------------------------------------------------------------------------------------------------------------------------------------------------------------------------------------------------------------------------------------------------------------------------------------------------------------------------------------------------------------------------------------------------------------------------------------------------------------------------------------------------------------------------------------------------------------------------------------------------------------------------------------------------------------------------------------------------------------------------------------------------------------------------------------------------------------------------------------------------------------------------|
| GO:0048468~cell development                 | 36         | 3.97E-06 | Pregnancy   | Down       | <i>EDN3, EFNA2, KIT, CITED1, TGFB2, SEMA5A, EDNRA, ALDH1A2, CD44, ROBO1, MKKS, PPP3CA, SPON2, PPP2R2B, COL11A1, DCLK1, KCNMA1, BMP2, MSH2, MAP1B, IGF1, SIX5, MYOZ1, ZNF358, CDK5, HES1, CDKN1C, AMIGO1, VEGFA, NOTCH4, NTRK2, EFNA5, VCAN, KLHL10, DST, FEZ1</i>                                                                                                                                                                                                                                                                                                                                                                                                                                                                                                                                                                                                                                                                                                                                                                |
| GO:0032501~multicellular organismal process | 139        | 1.04E-05 | Pregnancy   | Down       | <i>EDN3, TSPAN2, GRIK1, EFNA2, CRHBP, JAG2, JAG1, AQP1, CITED1, TGFB2, OLFML3, HMCN1, CD44, SERPINE2, PPP1R1B, CDKN2C, ROBO1, SMARCD3, ROBO4, COL12A1, PATZ1, CREB3L4, ASPH, SPON2, CRTAP, SIX5, KRT10, PRELP, HES1, SERPINF1, TCFL5, GTF2IRD1, VEGFA, COL1A2, EFNA5, TGFB11, COL1A1, DST, FXYD1, KCNMB4, EMCN, MFNG, MRAS, TIMP4, ELK3, MEIS1, SEMA5A, TUBB, HNMT, BCHE, AHNAK2, PPP2R2B, ANGPTL2, BMP2, SPHK2, MSTN, ZNF521, ANKH, CDKN1C, LAMA4, HOXB7, SFRP2, CD59, ITGA7, NOTCH4, NTRK2, CACNA1G, FABP7, TRPV2, NPNT, IGFBP7, EDNRA, LBH, OSR2, SERPINA5, MKKS, SOX18, COL11A1, KCNMA1, EGFL7, ACTA2, LDB1, LDB2, ARHGAP24, CDK5, MMP11, AMIGO1, CCND1, LCK, VCAN, SGCE, KLHL10, IRX3, UNG, FHL1, COL3A1, OXTR, TIMM13, CDH2, KIT, MLF1, IGSF10, ALDH1A2, CRISPLD2, DISP1, HSF2BP, PPP3CA, SCNN1A, DCLK1, MLLT3, COL4A4, NES, TNXB, COL13A1, MSH2, MAP1A, MAP1B, HSPG2, IGF1, DPYSL3, NLGN3, NID1, NPR2, DPYSL2, COL5A3, SNAI2, RCAN2, ZNF358, WNT2B, CDH13, ICK, SLC6A8, FYN, FBLN5, PECAM1, MPPED2, GAMT, FEZ1, CDH11</i> |

| Term                                  | Gene,<br>n | P-value  | Main Effect | Regulation | Genes                                                                                                                                                                                                                                                                                                                                                                                                                                                                                     |
|---------------------------------------|------------|----------|-------------|------------|-------------------------------------------------------------------------------------------------------------------------------------------------------------------------------------------------------------------------------------------------------------------------------------------------------------------------------------------------------------------------------------------------------------------------------------------------------------------------------------------|
| GO:0048514~blood vessel morphogenesis | 18         | 1.13E-05 | Pregnancy   | Down       | <i>EMCN, EGFL7, ELK3, CDH2, JAG1, ARHGAP24, CITED1, TGFB2, EDNRA, SEMA5A, CDH13, ROBO1, VEGFA, ITGA7, NOTCH4, NTRK2, ROBO4, SOX18</i>                                                                                                                                                                                                                                                                                                                                                     |
| GO:0007399~nervous system development | 49         | 1.91E-05 | Pregnancy   | Down       | <i>EDN3, TSPAN2, GRIK1, EFNA2, JAG2, JAG1, TGFB2, CD44, SERPINE2, ROBO1, CDKN2C, MKKS, SPON2, KCNMA1, LDB1, CDK5, HES1, AMIGO1, SERPINF1, VEGFA, EFNA5, VCAN, DST, IRX3, OXTR, TIMP4, KIT, CDH2, SEMA5A, ALDH1A2, TUBB, DCLK1, NES, BMP2, SPHK2, MAP1B, HSPG2, IGF1, DPYSL3, DPYSL2, ZNF358, RCAN2, CDKN1C, FYN, NTRK2, NOTCH4, MPPED2, FABP7, FEZ1</i>                                                                                                                                   |
| GO:0048699~generation of neurons      | 31         | 2.54E-05 | Pregnancy   | Down       | <i>IRX3, EDN3, EFNA2, JAG2, KIT, JAG1, CDH2, TGFB2, SEMA5A, ALDH1A2, TUBB, CD44, ROBO1, SPON2, DCLK1, KCNMA1, BMP2, LDB1, MAP1B, CDK5, HES1, AMIGO1, CDKN1C, SERPINF1, FYN, VEGFA, NTRK2, EFNA5, VCAN, DST, FEZ1</i>                                                                                                                                                                                                                                                                      |
| GO:0048513~organ development          | 68         | 3.15E-05 | Pregnancy   | Down       | <i>EDN3, EFNA2, JAG2, JAG1, CITED1, TGFB2, EDNRA, OSR2, CD44, SMARCD3, ROBO1, ROBO4, MKKS, PATZI, SOX18, COL11A1, KCNMA1, EGFL7, LDB1, SIX5, KRT10, ARHGAP24, CDK5, HES1, CCND1, LCK, VEGFA, COL1A2, EFNA5, SGCE, COL1A1, TGFB111, KLHL10, EMCN, FHL1, MRAS, COL3A1, OXTR, CDH2, ELK3, KIT, MLF1, IGSF10, SEMA5A, ALDH1A2, CRISPLD2, AHNAK2, PPP3CA, DCLK1, BMP2, SPHK2, MSH2, COL13A1, HSPG2, IGF1, MSTN, NID1, SNAI2, COL5A3, CDH13, LAMA4, HOXB7, FYN, ITGA7, NTRK2, NOTCH4, GAMT,</i> |

| Term                                           | Gene,<br>n | P-value  | Main Effect | Regulation | Genes                                                                                                                                                                                                                                             |
|------------------------------------------------|------------|----------|-------------|------------|---------------------------------------------------------------------------------------------------------------------------------------------------------------------------------------------------------------------------------------------------|
|                                                |            |          |             |            | <i>FABP7</i>                                                                                                                                                                                                                                      |
| GO:0007160~cell-matrix adhesion                | 11         | 4.66E-05 | Pregnancy   | Down       | <i>MIA, CD44, COL13A1, FBLN5, TEK, COL3A1, ITGA7, SGCE, NID1, COL5A3, CDK5</i>                                                                                                                                                                    |
| GO:0030334~regulation of cell migration        | 15         | 4.93E-05 | Pregnancy   | Down       | <i>EDN3, EGFL7, ENPP2, JAG2, IGF1, JAG1, KIT, CDK5, TGFB2, CDH13, LAMA4, SERPINE2, VEGFA, TEK, ROBO4</i>                                                                                                                                          |
| GO:0001525~angiogenesis                        | 14         | 4.99E-05 | Pregnancy   | Down       | <i>EMCN, EGFL7, JAG1, ELK3, ARHGAP24, TGFB2, EDNRA, SEMA5A, CDH13, ROBO1, NOTCH4, VEGFA, ROBO4, SOX18</i>                                                                                                                                         |
| GO:0030199~collagen fibril organization        | 7          | 5.03E-05 | Pregnancy   | Down       | <i>COL3A1, COL1A2, COL12A1, COL1A1, COL5A3, COL11A1, TGFB2</i>                                                                                                                                                                                    |
| GO:0040012~regulation of locomotion            | 16         | 5.27E-05 | Pregnancy   | Down       | <i>EDN3, EGFL7, ENPP2, JAG2, IGF1, JAG1, KIT, CDK5, TGFB2, CDH13, LAMA4, SERPINE2, TEK, VEGFA, ROBO4, MKKS</i>                                                                                                                                    |
| GO:0051270~regulation of cell motion           | 16         | 5.60E-05 | Pregnancy   | Down       | <i>EDN3, EGFL7, ENPP2, JAG2, IGF1, JAG1, KIT, CDK5, TGFB2, CDH13, LAMA4, SERPINE2, TEK, VEGFA, ROBO4, MKKS</i>                                                                                                                                    |
| GO:0050793~regulation of developmental process | 34         | 6.19E-05 | Pregnancy   | Down       | <i>IRX3, EDN3, CCDC85B, OXTR, JAG1, KIT, CDH2, TGFB2, CDC42EP1, ROBO1, TEK, DDAH1, COL4A4, BMP2, PTGER4, LDB1, MAP1B, MSTN, IGF1, ZNF358, ANKH, HES1, AMIGO1, LAMA4, CCND1, SERPINF1, TCFL5, FYN, STAB1, VEGFA, NTRK2, NOTCH4, ITGA7, TGFBIII</i> |

| Term                                                      | Gene,<br>n | P-value  | Main Effect | Regulation | Genes                                                                                                                                                                                                              |
|-----------------------------------------------------------|------------|----------|-------------|------------|--------------------------------------------------------------------------------------------------------------------------------------------------------------------------------------------------------------------|
| GO:0009628~response to abiotic stimulus                   | 23         | 6.67E-05 | Pregnancy   | Down       | <i>KCNMA1, BMP2, NES, MSH2, TRPV2, IGFBP7, COL3A1, MAP1B, MSTN, NLGN3, KIT, HVCN1, SNAI2, CDK5, CCND1, UACA, HSPB6, FYN, HSPB8, DDB2, MKKS, COL1A1, COL11A1</i>                                                    |
| GO:0031589~cell-substrate adhesion                        | 11         | 1.06E-04 | Pregnancy   | Down       | <i>MIA, CD44, COL13A1, FBLN5, TEK, COL3A1, ITGA7, SGCE, NID1, COL5A3, CDK5</i>                                                                                                                                     |
| GO:0030182~neuron differentiation                         | 25         | 1.22E-04 | Pregnancy   | Down       | <i>EDN3, EFNA2, JAG2, JAG1, TGFB2, SEMA5A, ALDH1A2, TUBB, CD44, ROBO1, SPON2, DCLK1, KCNMA1, LDB1, MAP1B, CDK5, AMIGO1, CDKN1C, HES1, NTRK2, VEGFA, EFNA5, VCAN, DST, FEZ1</i>                                     |
| GO:0032879~regulation of localization                     | 31         | 1.27E-04 | Pregnancy   | Down       | <i>KCNMB4, EDN3, JPH4, GRIK1, ENPP2, JAG2, OXTR, JAG1, KIT, CDH2, TGFB2, EDNRA, SERPINE2, TEK, ROBO4, MKKS, SCG5, SERGEF, EGFL7, IGF1, PFKM, CDK5, FLNA, SYNGR3, CDH13, LAMA4, UACA, VEGFA, NTRK2, LCK, MBTPS1</i> |
| GO:0051969~regulation of transmission of nerve impulse    | 13         | 1.94E-04 | Pregnancy   | Down       | <i>COL4A4, EDN3, KCNMB4, GRIK1, MAP1B, OXTR, NLGN3, CDH2, KIT, CDK5, BCHE, NTRK2, PPP3CA</i>                                                                                                                       |
| GO:0000904~cell morphogenesis involved in differentiation | 17         | 2.35E-04 | Pregnancy   | Down       | <i>BMP2, EFNA2, MAP1B, CDK5, CITED1, TGFB2, AMIGO1, HES1, SEMA5A, ROBO1, NOTCH4, VCAN, EFNA5, SPON2, DST, DCLK1, FEZ1</i>                                                                                          |
| GO:0031644~regulation of neurological system process      | 13         | 2.82E-04 | Pregnancy   | Down       | <i>COL4A4, EDN3, KCNMB4, GRIK1, MAP1B, OXTR, NLGN3, CDH2, KIT, CDK5, BCHE, NTRK2, PPP3CA</i>                                                                                                                       |
| GO:0016337~cell-cell                                      | 18         | 3.17E-04 | Pregnancy   | Down       | <i>CADM3, EMCN, GMDS, COL13A1, CLDN5, PCDHGA8, CLDN10, CDH2, PCDHGC3, PCDHGB4,</i>                                                                                                                                 |

| Term                                                 | Gene,<br>n | P-value  | Main Effect | Regulation | Genes                                                                                                                                                                                                                                                                                                                                                                                                                                                                                     |
|------------------------------------------------------|------------|----------|-------------|------------|-------------------------------------------------------------------------------------------------------------------------------------------------------------------------------------------------------------------------------------------------------------------------------------------------------------------------------------------------------------------------------------------------------------------------------------------------------------------------------------------|
| adhesion                                             |            |          |             |            | <i>AMIGO1, CDH13, CD44, ROBO1, TEK, JAM2, COL11A1, CDH11</i>                                                                                                                                                                                                                                                                                                                                                                                                                              |
| GO:0000902~cell morphogenesis                        | 21         | 3.24E-04 | Pregnancy   | Down       | <i>BMP2, EFNA2, MAP1B, CDK5, CITED1, TGFB2, TTLL3, AMIGO1, SEMA5A, HES1, ROBO1, NOTCH4, MKKS, VCAN, EFNA5, CLASP2, KLHL10, SPON2, DST, DCLK1, FEZ1</i>                                                                                                                                                                                                                                                                                                                                    |
| GO:0048519~negative regulation of biological process | 66         | 3.47E-04 | Pregnancy   | Down       | <i>EDN3, EIF2C1, GRIK1, CCDC85B, IGFBP7, JAG1, LATS2, CITED1, TGFB2, EDNRA, WISP2, CDKN2C, SERPINA5, ASPH, KCNMA1, EGFL7, LDB1, ESR1, SIX5, CDK5, FLNA, HES1, CCND1, SERPINF1, LCK, VEGFA, WFDC1, TGFB111, COL1A1, EIF2AK2, LCOR, EID1, IRX3, COL3A1, KIT, ELK3, ALDH1A2, PEG10, TNRC6C, BCHE, DDIT4L, CLASP2, TCF4, PIK3R2, SERGEF, BMP2, SPHK2, MSH2, MAP1A, MAP1B, TAF7, KLF11, LMCD1, IGF1, MSTN, SNAI2, ZNF358, SIRT3, CDKN1C, CDH13, UACA, STAB1, RGS5, NOTCH4, FABP7, ADAMDEC1</i> |
| GO:0050804~regulation of synaptic transmission       | 12         | 3.87E-04 | Pregnancy   | Down       | <i>COL4A4, KCNMB4, EDN3, GRIK1, BCHE, MAP1B, NTRK2, OXTR, NLGN3, KIT, PPP3CA, CDK5</i>                                                                                                                                                                                                                                                                                                                                                                                                    |
| GO:0032989~cellular component morphogenesis          | 22         | 5.14E-04 | Pregnancy   | Down       | <i>BMP2, EFNA2, MAP1B, MYOZ1, CDK5, CITED1, TGFB2, TTLL3, AMIGO1, SEMA5A, HES1, ROBO1, NOTCH4, MKKS, VCAN, EFNA5, CLASP2, KLHL10, SPON2, DST, DCLK1, FEZ1</i>                                                                                                                                                                                                                                                                                                                             |
| GO:0048545~response to steroid hormone stimulus      | 14         | 6.60E-04 | Pregnancy   | Down       | <i>KCNMA1, IGFBP7, MAP1B, ESR1, MSTN, OXTR, AQP1, CITED1, TGFB2, ALDH1A2, CCND1, BCHE, WFDC1, COL1A1</i>                                                                                                                                                                                                                                                                                                                                                                                  |

| Term                                                                | Gene,<br>n | P-value  | Main Effect | Regulation | Genes                                                                                                                                                                                                                                                                             |
|---------------------------------------------------------------------|------------|----------|-------------|------------|-----------------------------------------------------------------------------------------------------------------------------------------------------------------------------------------------------------------------------------------------------------------------------------|
| GO:0048646~anatomical structure formation involved in morphogenesis | 20         | 7.34E-04 | Pregnancy   | Down       | <i>EMCN, EGFL7, LDB1, MYOZ1, ELK3, JAG1, ARHGAP24, CDK5, TGFB2, SEMA5A, EDNRA, CDH13, CD44, ROBO1, SFRP2, VEGFA, NOTCH4, ROBO4, SOX18, COL1A1</i>                                                                                                                                 |
| GO:0051239~regulation of multicellular organismal process           | 39         | 7.95E-04 | Pregnancy   | Down       | <i>KCNMB4, EDN3, IRX3, GRIK1, OXTR, JAG1, KIT, CDH2, TGFB2, BCHE, ROBO1, TEK, CNN1, PPP3CA, DDAH1, KCNMA1, COL4A4, BMP2, PTGER4, LDB1, MAP1B, MSTN, IGF1, NLGN3, CDK5, ANKH, HES1, AMIGO1, LAMA4, CCND1, SERPINF1, PTGDS, STAB1, VEGFA, NTRK2, NOTCH4, CACNA1G, GAMT, TGFB111</i> |
| GO:0043627~response to estrogen stimulus                            | 10         | 8.55E-04 | Pregnancy   | Down       | <i>KCNMA1, ALDH1A2, CCND1, MAP1B, ESRI, OXTR, MSTN, WFDC1, AQP1, CITED1</i>                                                                                                                                                                                                       |
| GO:0010647~positive regulation of cell communication                | 19         | 8.78E-04 | Pregnancy   | Down       | <i>COL4A4, BMP2, GRIK1, TSPAN6, ESRI, OXTR, IGF1, KIT, JAG1, FLNA, CITED1, TGFB2, CDKN1C, CDH13, PLK2, LCK, VEGFA, NTRK2, TGFB111</i>                                                                                                                                             |
| GO:0014829~vascular smooth muscle contraction                       | 4          | 9.92E-04 | Pregnancy   | Down       | <i>EDNRA, EDN3, ACTA2, CACNA1G</i>                                                                                                                                                                                                                                                |
| GO:0044057~regulation of system process                             | 18         | 0.001128 | Pregnancy   | Down       | <i>COL4A4, KCNMA1, EDN3, KCNMB4, GRIK1, MAP1B, OXTR, MSTN, NLGN3, CDH2, KIT, CDK5, TGFB2, BCHE, NTRK2, CACNA1G, CNN1, PPP3CA</i>                                                                                                                                                  |
| GO:0010720~positive regulation of cell development                  | 8          | 0.001196 | Pregnancy   | Down       | <i>AMIGO1, BMP2, SERPINF1, ROBO1, MAP1B, TGFB111, KIT, TGFB2</i>                                                                                                                                                                                                                  |

| Term                                                        | Gene,<br>n | P-value  | Main Effect | Regulation | Genes                                                                                                                                              |
|-------------------------------------------------------------|------------|----------|-------------|------------|----------------------------------------------------------------------------------------------------------------------------------------------------|
| GO:0001763~morphogenesis of a branching structure           | 8          | 0.001804 | Pregnancy   | Down       | <i>SEMA5A, EDNRA, BMP2, CD44, COL13A1, VEGFA, NOTCH4, IGF1</i>                                                                                     |
| GO:0051960~regulation of nervous system development         | 13         | 0.002084 | Pregnancy   | Down       | <i>COL4A4, IRX3, BMP2, MAP1B, IGF1, OXTR, CDH2, KIT, HES1, AMIGO1, SERPINF1, ROBO1, NTRK2</i>                                                      |
| GO:0022603~regulation of anatomical structure morphogenesis | 14         | 0.002174 | Pregnancy   | Down       | <i>MAP1B, CDH2, TGFB2, AMIGO1, CDC42EP1, SERPINF1, STAB1, FYN, ROBO1, ITGA7, VEGFA, TEK, TGFB111, DDAH1</i>                                        |
| GO:0003012~muscle system process                            | 12         | 0.002198 | Pregnancy   | Down       | <i>KCNMA1, EDNRA, FXYD1, EDN3, ACTA2, SLC6A8, CACNA1G, OXTR, MSTN, IGF1, GAMT, ASPH</i>                                                            |
| GO:0007417~central nervous system development               | 21         | 0.002798 | Pregnancy   | Down       | <i>NES, SPHK2, GRIK1, EFNA2, LDB1, MAP1B, HSPG2, JAG2, OXTR, TIMP4, CDK5, RCAN2, HES1, ALDH1A2, CDKN2C, FYN, NOTCH4, MKKS, EFNA5, FABP7, DCLK1</i> |
| GO:0048666~neuron development                               | 18         | 0.002995 | Pregnancy   | Down       | <i>EFNA2, MAP1B, CDK5, TGFB2, AMIGO1, HES1, SEMA5A, CDKN1C, CD44, ROBO1, VEGFA, NTRK2, VCAN, EFNA5, SPON2, DST, DCLK1, FEZ1</i>                    |
| GO:0060284~regulation of cell development                   | 13         | 0.003598 | Pregnancy   | Down       | <i>COL4A4, IRX3, BMP2, MAP1B, CDH2, KIT, TGFB2, HES1, AMIGO1, SERPINF1, ROBO1, NTRK2, TGFB111</i>                                                  |
| GO:0009719~response to endogenous stimulus                  | 20         | 0.003657 | Pregnancy   | Down       | <i>KCNMA1, ADCY4, MSH2, IGFBP7, MAP1B, ESRI, OXTR, MSTN, TIMP4, AQP1, CITED1, LATS2, TGFB2, CDH13, ALDH1A2, CCND1, BCHE, WFDC1, PPP3CA, COL1A1</i> |

| Term                                                             | Gene,<br>n | P-value  | Main Effect | Regulation | Genes                                                                                                                                                |
|------------------------------------------------------------------|------------|----------|-------------|------------|------------------------------------------------------------------------------------------------------------------------------------------------------|
| GO:0022604~regulation of cell morphogenesis                      | 10         | 0.003946 | Pregnancy   | Down       | <i>AMIGO1, CDC42EP1, ROBO1, FYN, VEGFA, MAP1B, ITGA7, TGFB111, CDH2, TGFB2</i>                                                                       |
| GO:0048667~cell morphogenesis involved in neuron differentiation | 13         | 0.004164 | Pregnancy   | Down       | <i>EFNA2, MAP1B, CDK5, HES1, SEMA5A, AMIGO1, ROBO1, VCAN, EFNA5, SPON2, DST, DCLK1, FEZ1</i>                                                         |
| GO:0048754~branching morphogenesis of a tube                     | 7          | 0.004289 | Pregnancy   | Down       | <i>SEMA5A, EDNRA, BMP2, CD44, VEGFA, NOTCH4, IGF1</i>                                                                                                |
| GO:0042490~mechanoreceptor differentiation                       | 5          | 0.004582 | Pregnancy   | Down       | <i>KCNMA1, HES1, NTRK2, JAG2, JAG1</i>                                                                                                               |
| GO:0033273~response to vitamin                                   | 7          | 0.004626 | Pregnancy   | Down       | <i>ALDH1A2, CCND1, BMP2, CD44, BCHE, IGFBP7, MAP1B</i>                                                                                               |
| GO:0006928~cell motion                                           | 22         | 0.004662 | Pregnancy   | Down       | <i>EDN3, MTSS1, ENPP2, MSH2, EFNA2, IGF1, KIT, CDH2, CDK5, TGFB2, SEMA5A, CDH13, TUBB, CD44, ROBO1, FYN, VCAN, EFNA5, CLASP2, SPON2, DCLK1, FEZ1</i> |
| GO:0030155~regulation of cell adhesion                           | 10         | 0.00529  | Pregnancy   | Down       | <i>CDH13, LAMA4, EMCN, EGFLAM, JAG2, CCDC80, NID1, COL1A1, ADAMDEC1, TGFB2</i>                                                                       |
| GO:0048858~cell projection morphogenesis                         | 14         | 0.005726 | Pregnancy   | Down       | <i>EFNA2, MAP1B, CDK5, TLL3, AMIGO1, SEMA5A, ROBO1, MKKS, VCAN, EFNA5, SPON2, DST, DCLK1, FEZ1</i>                                                   |
| GO:0048523~negative regulation of cellular process               | 56         | 0.005952 | Pregnancy   | Down       | <i>EDN3, EIF2C1, GRIK1, CCDC85B, IGFBP7, JAG1, LATS2, CITED1, TGFB2, EDNRA, WISP2, CDKN2C, SERPINA5, ASPH, EGFL7, LDB1, ESR1, SIX5, CDK5,</i>        |



| Term                                                     | Gene,<br>n | P-value  | Main Effect | Regulation | Genes                                                                                                                                                                                                                                                                     |
|----------------------------------------------------------|------------|----------|-------------|------------|---------------------------------------------------------------------------------------------------------------------------------------------------------------------------------------------------------------------------------------------------------------------------|
|                                                          |            |          |             |            | <i>HES1, CCND1, VEGFA, WFDC1, TGFB11, COL1A1, EIF2AK2, LCOR, EID1, IRX3, KIT, ELK3, ALDH1A2, PEG10, BCHE, DDIT4L, CLASP2, TCF4, SERGEF, BMP2, SPHK2, MSH2, MAP1A, MAP1B, TAF7, KLF11, LMCD1, IGF1, SNAI2, ZNF358, SIRT3, CDKN1C, CDH13, RGS5, NOTCH4, FABP7, ADAMDEC1</i> |
| GO:0007409~axonogenesis                                  | 12         | 0.006303 | Pregnancy   | Down       | <i>AMIGO1, SEMA5A, ROBO1, EFNA2, MAP1B, EFNA5, VCAN, SPON2, CDK5, DST, DCLK1, FEZ1</i>                                                                                                                                                                                    |
| GO:0051128~regulation of cellular component organization | 21         | 0.006411 | Pregnancy   | Down       | <i>COL4A4, EDN3, MAP1A, TAF7, MAP1B, OXTR, IGF1, KIT, CDH2, TGFB2, AMIGO1, CDH13, CDC42EPI, ROBO1, FYN, VEGFA, ITGA7, NTRK2, CLASP2, TGFB11, DST</i>                                                                                                                      |
| GO:0042127~regulation of cell proliferation              | 31         | 0.00677  | Pregnancy   | Down       | <i>FGFR2, EDN3, IGFBP7, JAG2, JAG1, KIT, TGFB2, EDNRA, ALDH1A2, WISP2, OSR2, CDKN2C, TEK, ASPH, BMP2, SPHK2, KLF11, IGF1, SIX5, HES1, CDKN1C, CDH13, CCND1, TCFL5, DBP, VEGFA, NOTCH4, WFDC1, TGFB11, EIF2AK2, FABP7</i>                                                  |
| GO:0030030~cell projection organization                  | 18         | 0.006772 | Pregnancy   | Down       | <i>MTSS1, EFNA2, MAP1B, CDK5, TTLL3, AMIGO1, SEMA5A, CDH13, CD44, ROBO1, CC2D2A, MKKS, VCAN, EFNA5, SPON2, DST, DCLK1, FEZ1</i>                                                                                                                                           |
| GO:0042310~vasoconstriction                              | 4          | 0.006978 | Pregnancy   | Down       | <i>EDNRA, EDN3, ACTA2, CACNA1G</i>                                                                                                                                                                                                                                        |
| GO:0006939~smooth muscle contraction                     | 5          | 0.007331 | Pregnancy   | Down       | <i>KCNMA1, EDNRA, EDN3, ACTA2, CACNA1G</i>                                                                                                                                                                                                                                |
| GO:0007167~enzyme linked                                 | 17         | 0.007587 | Pregnancy   | Down       | <i>FGFR2, MTSS1, PTPRD, BMP2, REPS2, COL3A1,</i>                                                                                                                                                                                                                          |

| Term                                                    | Gene,<br>n | P-value  | Main Effect | Regulation | Genes                                                                                                                                                                                                                                                                    |
|---------------------------------------------------------|------------|----------|-------------|------------|--------------------------------------------------------------------------------------------------------------------------------------------------------------------------------------------------------------------------------------------------------------------------|
| receptor protein signaling pathway                      |            |          |             |            | <i>MSTN, KIT, CDK5, FLNA, CITED1, TGFB2, TEK, VEGFA, NTRK2, COL1A2, TGFB11</i>                                                                                                                                                                                           |
| GO:0032990~cell part morphogenesis                      | 14         | 0.008023 | Pregnancy   | Down       | <i>EFNA2, MAP1B, CDK5, TTLL3, AMIGO1, SEMA5A, ROBO1, MKKS, VCAN, EFNA5, SPON2, DST, DCLK1, FEZ1</i>                                                                                                                                                                      |
| GO:0010646~regulation of cell communication             | 38         | 0.008095 | Pregnancy   | Down       | <i>KCNMB4, EDN3, GRIK1, TSPAN6, OXTR, JAG1, KIT, CDH2, TRIB2, CITED1, TGFB2, PLEKHG2, PEG10, BCHE, GEFT, SCG5, PPP3CA, DDIT4L, COL4A4, RAMP2, BMP2, MAP1B, ESR1, IGF1, NLGN3, PFKM, CDK5, FLNA, CDKN1C, TBC1D24, CDH13, CCND1, PLK2, VEGFA, RGS5, NTRK2, LCK, TGFB11</i> |
| GO:0042491~auditory receptor cell differentiation       | 4          | 0.008228 | Pregnancy   | Down       | <i>KCNMA1, HES1, JAG2, JAG1</i>                                                                                                                                                                                                                                          |
| GO:0009888~tissue development                           | 27         | 0.008422 | Pregnancy   | Down       | <i>EDN3, COL3A1, JAG2, JAG1, CITED1, TGFB2, IGSF10, EDNRA, ALDH1A2, CD44, AHNAK2, MKKS, PPP3CA, COL11A1, BMP2, HSPG2, MSTN, IGF1, KRT10, COL5A3, SNAI2, CDK5, NOTCH4, VEGFA, COL1A2, COL1A1, TGFB11</i>                                                                  |
| GO:0051093~negative regulation of developmental process | 14         | 0.008854 | Pregnancy   | Down       | <i>IRX3, CCDC85B, LDB1, IGF1, MSTN, JAG1, KIT, ZNF358, HES1, CCND1, SERPINF1, STAB1, NOTCH4, TGFB11</i>                                                                                                                                                                  |
| GO:0007420~brain development                            | 15         | 0.009059 | Pregnancy   | Down       | <i>SPHK2, EFNA2, LDB1, HSPG2, JAG2, OXTR, CDK5, HES1, ALDH1A2, FYN, NOTCH4, MKKS, EFNA5, FABP7, DCLK1</i>                                                                                                                                                                |

| Term                                                  | Gene,<br>n | P-value  | Main Effect | Regulation | Genes                                                                                                                      |
|-------------------------------------------------------|------------|----------|-------------|------------|----------------------------------------------------------------------------------------------------------------------------|
| GO:0001501~skeletal system development                | 16         | 0.009225 | Pregnancy   | Down       | <i>BMP2, COL13A1, COL3A1, HSPG2, JAG2, IGF1, ANKH, PRELP, IGSF10, OSR2, HOXB7, COL1A2, COL12A1, COL1A1, COL11A1, CDH11</i> |
| GO:0009612~response to mechanical stimulus            | 6          | 0.010254 | Pregnancy   | Down       | <i>BMP2, FYN, MAP1B, MKKS, COL1A1, COL11A1</i>                                                                             |
| GO:0006936~muscle contraction                         | 10         | 0.010621 | Pregnancy   | Down       | <i>KCNMA1, EDNRA, FXYD1, EDN3, ACTA2, SLC6A8, CACNA1G, OXTR, GAMT, ASPH</i>                                                |
| GO:0048729~tissue morphogenesis                       | 11         | 0.010647 | Pregnancy   | Down       | <i>ALDH1A2, BMP2, CD44, COL1A2, JAG2, MKKS, TGFB111, JAG1, COL1A1, COL11A1, TGFB2</i>                                      |
| GO:0009967~positive regulation of signal transduction | 15         | 0.010729 | Pregnancy   | Down       | <i>BMP2, TSPAN6, ESRI, IGF1, JAG1, KIT, FLNA, CITED1, TGFB2, CDKN1C, CDH13, PLK2, LCK, VEGFA, TGFB111</i>                  |
| GO:0048511~rhythmic process                           | 9          | 0.011111 | Pregnancy   | Down       | <i>KCNMA1, BMP2, PTGDS, DBP, VEGFA, OXTR, MSTN, TIMP4, TGFB2</i>                                                           |
| GO:0007389~pattern specification process              | 14         | 0.011233 | Pregnancy   | Down       | <i>MFNG, LDB1, HES1, EDNRA, SEMA5A, ALDH1A2, HOXB7, DISP1, SFRP2, NOTCH4, VEGFA, MKKS, ASPH, MLLT3</i>                     |
| GO:0003018~vascular process in circulatory system     | 6          | 0.01184  | Pregnancy   | Down       | <i>KCNMA1, EDNRA, EDN3, ACTA2, VEGFA, CACNA1G</i>                                                                          |
| GO:0007156~homophilic cell adhesion                   | 9          | 0.012658 | Pregnancy   | Down       | <i>AMIGO1, CDH13, CADM3, ROBO1, PCDHGA8, PCDHGC3, CDH2, CDH11, PCDHGB4</i>                                                 |

| Term                                           | Gene,<br>n | P-value  | Main Effect | Regulation | Genes                                                                                                                                                                     |
|------------------------------------------------|------------|----------|-------------|------------|---------------------------------------------------------------------------------------------------------------------------------------------------------------------------|
| GO:0048812~neuron projection morphogenesis     | 12         | 0.01267  | Pregnancy   | Down       | <i>AMIGO1, SEMA5A, ROBO1, EFNA2, MAP1B, EFNA5, VCAN, SPON2, CDK5, DST, DCLK1, FEZ1</i>                                                                                    |
| GO:0050769~positive regulation of neurogenesis | 6          | 0.012693 | Pregnancy   | Down       | <i>AMIGO1, BMP2, SERPINF1, ROBO1, MAP1B, KIT</i>                                                                                                                          |
| GO:0001569~patterning of blood vessels         | 4          | 0.012729 | Pregnancy   | Down       | <i>SEMA5A, EDNRA, VEGFA, NOTCH4</i>                                                                                                                                       |
| GO:0045595~regulation of cell differentiation  | 21         | 0.013447 | Pregnancy   | Down       | <i>COL4A4, IRX3, BMP2, CCDC85B, LDB1, MAP1B, IGF1, KIT, CDH2, JAG1, ZNF358, TGFB2, AMIGO1, HES1, CCND1, TCFL5, SERPINF1, ROBO1, NOTCH4, NTRK2, TGFB11</i>                 |
| GO:0009725~response to hormone stimulus        | 17         | 0.014117 | Pregnancy   | Down       | <i>KCNMA1, ADCY4, IGFBP7, MAP1B, ESRI, OXTR, MSTN, TIMP4, AQP1, LATS2, CITED1, TGFB2, ALDH1A2, CCND1, BCHE, WFDC1, COL1A1</i>                                             |
| GO:0009887~organ morphogenesis                 | 23         | 0.015032 | Pregnancy   | Down       | <i>BMP2, COL13A1, FHL1, HSPG2, JAG2, IGF1, JAG1, TGFB2, ALDH1A2, CCND1, OSR2, HOXB7, CD44, SMARCD3, VEGFA, NTRK2, COL1A2, MKKS, GAMT, COL1A1, TGFB11, KLHL10, COL11A1</i> |
| GO:0001570~vasculogenesis                      | 5          | 0.01566  | Pregnancy   | Down       | <i>EGFL7, VEGFA, NTRK2, SOX18, CITED1</i>                                                                                                                                 |
| GO:0009790~embryonic development               | 23         | 0.016251 | Pregnancy   | Down       | <i>BMP2, MSH2, LDB1, MAP1B, HSPG2, JAG2, ZNF358, CDK5, CITED1, TGFB2, EDNRA, HES1, ALDH1A2, OSR2, HOXB7, DISP1, SFRP2, VEGFA, NOTCH4, MKKS, COL1A1, TGFB11, COL11A1</i>   |

| Term                                                     | Gene,<br>n | P-value  | Main Effect | Regulation | Genes                                                                                                                                                                                                                               |
|----------------------------------------------------------|------------|----------|-------------|------------|-------------------------------------------------------------------------------------------------------------------------------------------------------------------------------------------------------------------------------------|
| GO:0060078~regulation of postsynaptic membrane potential | 4          | 0.016371 | Pregnancy   | Down       | <i>GRIK1, NLGN3, PPP3CA, CDK5</i>                                                                                                                                                                                                   |
| GO:0016339~calcium-dependent cell-cell adhesion          | 4          | 0.016371 | Pregnancy   | Down       | <i>CDH13, PCDHGC3, CDH2, PCDHGB4</i>                                                                                                                                                                                                |
| GO:0033189~response to vitamin A                         | 5          | 0.016995 | Pregnancy   | Down       | <i>ALDH1A2, BMP2, CD44, IGFBP7, MAP1B</i>                                                                                                                                                                                           |
| GO:0009605~response to external stimulus                 | 33         | 0.017043 | Pregnancy   | Down       | <i>EDN3, ENPP2, IGFBP7, COL3A1, ELK3, TGFB2, IGSF10, ALDH1A2, HMCN1, CD44, BCHE, ROBO1, MKKS, COL11A1, KCNMA1, SUOX, NES, BMP2, MAP1B, LYZ, MSTN, IGF1, CDK5, CCND1, STAB1, SFRP2, FYN, FBLN5, CD59, VCAN, COL1A1, FABP7, CD302</i> |
| GO:0050767~regulation of neurogenesis                    | 10         | 0.017331 | Pregnancy   | Down       | <i>AMIGO1, HES1, IRX3, BMP2, SERPINF1, ROBO1, MAP1B, NTRK2, KIT, CDH2</i>                                                                                                                                                           |
| GO:0007584~response to nutrient                          | 9          | 0.018243 | Pregnancy   | Down       | <i>ALDH1A2, SUOX, CCND1, BMP2, CD44, BCHE, IGFBP7, MAP1B, COL1A1</i>                                                                                                                                                                |
| GO:0060113~inner ear receptor cell differentiation       | 4          | 0.018389 | Pregnancy   | Down       | <i>KCNMA1, HES1, JAG2, JAG1</i>                                                                                                                                                                                                     |
| GO:0006029~proteoglycan metabolic process                | 5          | 0.018398 | Pregnancy   | Down       | <i>EGFLAM, CHST7, CHST9, IGF1, COL11A1</i>                                                                                                                                                                                          |
| GO:0042221~response to                                   | 43         | 0.018596 | Pregnancy   | Down       | <i>ADCY4, KCNMB4, EDN3, ENPP2, IGFBP7, COL3A1, JAG2, OXTR, TIMP4, HVCN1, AQP1, LATS2, CITED1,</i>                                                                                                                                   |

| Term                                                  | Gene,<br>n | P-value  | Main Effect | Regulation | Genes                                                                                                                                                                                                                                                                                                                                                  |
|-------------------------------------------------------|------------|----------|-------------|------------|--------------------------------------------------------------------------------------------------------------------------------------------------------------------------------------------------------------------------------------------------------------------------------------------------------------------------------------------------------|
| chemical stimulus                                     |            |          |             |            | <i>TGFB2, EDNRA, TYMS, ALDH1A2, CD44, BCHE, ROBO1, PLOD2, CREB3L4, PPP3CA, CABCI, KCNMA1, SUOX, NES, BMP2, MSH2, MAP1B, ESRI, MSTN, CDK5, CDH13, CCND1, FYN, VEGFA, ANXA11, LCK, CACNA1G, WFDC1, COL1A1, EIF2AK2</i>                                                                                                                                   |
| GO:0042063~gliogenesis                                | 6          | 0.018688 | Pregnancy   | Down       | <i>TSPAN2, CDKN2C, IGF1, VCAN, CDK5, TGFB2</i>                                                                                                                                                                                                                                                                                                         |
| GO:0031344~regulation of cell projection organization | 7          | 0.018889 | Pregnancy   | Down       | <i>AMIGO1, CDC42EP1, ROBO1, MAP1B, NTRK2, KIT, CDH2</i>                                                                                                                                                                                                                                                                                                |
| GO:0031175~neuron projection development              | 13         | 0.018903 | Pregnancy   | Down       | <i>EFNA2, MAP1B, CDK5, SEMA5A, AMIGO1, CD44, ROBO1, VCAN, EFNA5, SPON2, DST, DCLK1, FEZ1</i>                                                                                                                                                                                                                                                           |
| GO:0065008~regulation of biological quality           | 48         | 0.019676 | Pregnancy   | Down       | <i>FGFR2, FXYD1, EDN3, JPH4, KCNMB4, GRIK1, RBP1, CCDC85B, CRHBP, FHL1, COL3A1, OXTR, KIT, TGFB2, EDNRA, ALDH1A2, HMCN1, CDC42EP1, PPP1R1B, CDKN2C, MKKS, SCG5, PPP3CA, DCLK1, KCNMA1, COL4A4, ACTA2, MAP1B, IGF1, NPR2, NLGN3, PFKM, CDK5, FLNA, AMIGO1, SLC16A2, CPE, FYN, CHST9, CD59, FBLN5, VEGFA, ITGA7, LCK, COL1A2, CACNA1G, WFDC1, KLHL10</i> |
| GO:0042698~ovulation cycle                            | 6          | 0.021039 | Pregnancy   | Down       | <i>BMP2, VEGFA, OXTR, MSTN, TIMP4, TGFB2</i>                                                                                                                                                                                                                                                                                                           |
| GO:0010033~response to organic substance              | 27         | 0.0217   | Pregnancy   | Down       | <i>ADCY4, IGF1BP7, COL3A1, OXTR, TIMP4, AQP1, CITED1, LATS2, TGFB2, EDNRA, ALDH1A2, CD44, BCHE, CREB3L4, PPP3CA, KCNMA1, MSH2, MAP1B, ESRI, MSTN, CDK5, CDH13, CCND1, FYN, WFDC1, COL1A1, EIF2AK2</i>                                                                                                                                                  |

| Term                                                           | Gene,<br>n | P-value  | Main Effect | Regulation | Genes                                                                                                                                              |
|----------------------------------------------------------------|------------|----------|-------------|------------|----------------------------------------------------------------------------------------------------------------------------------------------------|
| GO:0048609~reproductive process in a multicellular organism    | 20         | 0.022944 | Pregnancy   | Down       | <i>BMP2, MSH2, CRTAP, JAG2, OXTR, MSTN, SIX5, TIMP4, KIT, TGFB2, TCFL5, PPP1R1B, SERPINA5, VEGFA, MKKS, CREB3L4, GAMT, HSF2BP, KLHL10, PPP2R2B</i> |
| GO:0032504~multicellular organism reproduction                 | 20         | 0.022944 | Pregnancy   | Down       | <i>BMP2, MSH2, CRTAP, JAG2, OXTR, MSTN, SIX5, TIMP4, KIT, TGFB2, TCFL5, PPP1R1B, SERPINA5, VEGFA, MKKS, CREB3L4, GAMT, HSF2BP, KLHL10, PPP2R2B</i> |
| GO:0010810~regulation of cell-substrate adhesion               | 5          | 0.02303  | Pregnancy   | Down       | <i>CDH13, EGFLAM, CCDC80, NID1, COL1A1</i>                                                                                                         |
| GO:0031099~regeneration                                        | 6          | 0.023575 | Pregnancy   | Down       | <i>IGSF10, CCND1, MAP1B, MSTN, IGF1, VCAN</i>                                                                                                      |
| GO:0031346~positive regulation of cell projection organization | 5          | 0.024717 | Pregnancy   | Down       | <i>AMIGO1, CDC42EP1, ROBO1, MAP1B, KIT</i>                                                                                                         |
| GO:0050678~regulation of epithelial cell proliferation         | 6          | 0.026301 | Pregnancy   | Down       | <i>CDKN1C, EDNRA, VEGFA, IGF1, WFDC1, TGFB2</i>                                                                                                    |
| GO:0010811~positive regulation of cell-substrate adhesion      | 4          | 0.027777 | Pregnancy   | Down       | <i>CDH13, EGFLAM, CCDC80, NID1</i>                                                                                                                 |
| GO:0032963~collagen metabolic process                          | 4          | 0.027777 | Pregnancy   | Down       | <i>TNXB, COL3A1, COL1A1, MMP11</i>                                                                                                                 |
| GO:0030900~forebrain                                           | 9          | 0.028179 | Pregnancy   | Down       | <i>HES1, ALDH1A2, FYN, EFNA2, OXTR, MKKS, FABP7,</i>                                                                                               |

| Term                                                              | Gene,<br>n | P-value  | Main Effect | Regulation | Genes                                                                           |
|-------------------------------------------------------------------|------------|----------|-------------|------------|---------------------------------------------------------------------------------|
| development                                                       |            |          |             |            | <i>CDK5, DCLK1</i>                                                              |
| GO:0032886~regulation of microtubule-based process                | 5          | 0.028311 | Pregnancy   | Down       | <i>MAP1A, MAP1B, MKKS, CLASP2, DST</i>                                          |
| GO:0051130~positive regulation of cellular component organization | 10         | 0.02842  | Pregnancy   | Down       | <i>AMIGO1, EDN3, CDC42EP1, ROBO1, MAP1B, OXTR, IGF1, TGFB11, KIT, TGFB2</i>     |
| GO:0007517~muscle organ development                               | 11         | 0.028852 | Pregnancy   | Down       | <i>FHL1, MRAS, ITGA7, HSPG2, MSTN, IGF1, SGCE, PPP3CA, COL11A1, CDK5, TGFB2</i> |
| GO:0003007~heart morphogenesis                                    | 6          | 0.029219 | Pregnancy   | Down       | <i>ALDH1A2, BMP2, SMARCD3, MKKS, COL11A1, TGFB2</i>                             |
| GO:0043588~skin development                                       | 4          | 0.030454 | Pregnancy   | Down       | <i>COL3A1, COL1A2, COL1A1, COL5A3</i>                                           |
| GO:0035239~tube morphogenesis                                     | 8          | 0.031292 | Pregnancy   | Down       | <i>SEMA5A, EDNRA, BMP2, CD44, VEGFA, NOTCH4, IGF1, MKKS</i>                     |
| GO:0001958~endochondral ossification                              | 3          | 0.0315   | Pregnancy   | Down       | <i>COL13A1, HSPG2, COL1A1</i>                                                   |
| GO:0014031~mesenchymal cell development                           | 5          | 0.032199 | Pregnancy   | Down       | <i>EDNRA, EDN3, ALDH1A2, BMP2, TGFB2</i>                                        |
| GO:0048762~mesenchymal cell differentiation                       | 5          | 0.032199 | Pregnancy   | Down       | <i>EDNRA, EDN3, ALDH1A2, BMP2, TGFB2</i>                                        |
| GO:0040008~regulation of                                          | 15         | 0.032631 | Pregnancy   | Down       | <i>COL4A4, CCDC85B, IGFBP7, MAP1B, IGF1, MSTN,</i>                              |



| Term                                                                                | Gene,<br>n | P-value  | Main Effect | Regulation | Genes                                                                                 |
|-------------------------------------------------------------------------------------|------------|----------|-------------|------------|---------------------------------------------------------------------------------------|
| growth                                                                              |            |          |             |            | <i>TGFB2, NOV, CDH13, WISP2, CD44, CDKN2C, WFDC1, GAMT, BRMS1L</i>                    |
| GO:0002009~morphogenesis of an epithelium                                           | 7          | 0.032669 | Pregnancy   | Down       | <i>ALDH1A2, BMP2, CD44, JAG2, MKKS, TGFB111, JAG1</i>                                 |
| GO:0021700~developmental maturation                                                 | 7          | 0.032669 | Pregnancy   | Down       | <i>KCNMA1, CDKN1C, HES1, CD44, VEGFA, MAP1B, TGFB2</i>                                |
| GO:0045596~negative regulation of cell differentiation                              | 11         | 0.03323  | Pregnancy   | Down       | <i>HES1, IRX3, CCND1, CCDC85B, LDB1, NOTCH4, IGF1, TGFB111, KIT, JAG1, ZNF358</i>     |
| GO:0060341~regulation of cellular localization                                      | 12         | 0.034222 | Pregnancy   | Down       | <i>KCNMB4, EDN3, SERGEF, UACA, NTRK2, OXTR, SCG5, PFKM, CDK5, MBTPS1, FLNA, TGFB2</i> |
| GO:0060485~mesenchyme development                                                   | 5          | 0.034255 | Pregnancy   | Down       | <i>EDNRA, EDN3, ALDH1A2, BMP2, TGFB2</i>                                              |
| GO:0007178~transmembrane receptor protein serine/threonine kinase signaling pathway | 7          | 0.035466 | Pregnancy   | Down       | <i>BMP2, COL3A1, COL1A2, MSTN, TGFB111, CITED1, TGFB2</i>                             |
| GO:0007050~cell cycle arrest                                                        | 7          | 0.035466 | Pregnancy   | Down       | <i>CDKN1C, CDKN2C, MSH2, AK1, DST, MLF1, TGFB2</i>                                    |
| GO:0010769~regulation of cell morphogenesis involved in differentiation             | 6          | 0.035651 | Pregnancy   | Down       | <i>AMIGO1, ROBO1, MAP1B, TGFB111, CDH2, TGFB2</i>                                     |
| GO:0031110~regulation of                                                            | 4          | 0.036198 | Pregnancy   | Down       | <i>MAP1A, MAP1B, CLASP2, DST</i>                                                      |

| Term                                                                                         | Gene,<br>n | P-value  | Main Effect | Regulation | Genes                                                                                |
|----------------------------------------------------------------------------------------------|------------|----------|-------------|------------|--------------------------------------------------------------------------------------|
| microtubule polymerization or depolymerization                                               |            |          |             |            |                                                                                      |
| GO:0044259~multicellular organismal macromolecule metabolic process                          | 4          | 0.036198 | Pregnancy   | Down       | <i>TNXB, COL3A1, COL1A1, MMP11</i>                                                   |
| GO:0048661~positive regulation of smooth muscle cell proliferation                           | 4          | 0.036198 | Pregnancy   | Down       | <i>CDH13, VEGFA, NOTCH4, IGF1</i>                                                    |
| GO:0050880~regulation of blood vessel size                                                   | 5          | 0.036386 | Pregnancy   | Down       | <i>KCNMA1, EDNRA, EDN3, ACTA2, CACNA1G</i>                                           |
| GO:0035150~regulation of tube size                                                           | 5          | 0.036386 | Pregnancy   | Down       | <i>KCNMA1, EDNRA, EDN3, ACTA2, CACNA1G</i>                                           |
| GO:0030511~positive regulation of transforming growth factor beta receptor signaling pathway | 3          | 0.036655 | Pregnancy   | Down       | <i>CDKN1C, TGFB111, CITED1</i>                                                       |
| GO:0050974~detection of mechanical stimulus involved in sensory perception                   | 3          | 0.036655 | Pregnancy   | Down       | <i>FYN, MKKS, COL11A1</i>                                                            |
| GO:0035295~tube development                                                                  | 11         | 0.036719 | Pregnancy   | Down       | <i>SEMA5A, EDNRA, HES1, ALDH1A2, BMP2, CD44, CRISPLD2, VEGFA, NOTCH4, IGF1, MKKS</i> |
| GO:0009991~response to extracellular stimulus                                                | 11         | 0.036719 | Pregnancy   | Down       | <i>ALDH1A2, SUOX, CCND1, NES, BMP2, CD44, BCHE, SFRP2, IGFBP7, MAP1B, COL1A1</i>     |

| Term                                        | Gene,<br>n | P-value  | Main Effect | Regulation | Genes                                                                               |
|---------------------------------------------|------------|----------|-------------|------------|-------------------------------------------------------------------------------------|
| GO:0042060~wound healing                    | 10         | 0.038111 | Pregnancy   | Down       | <i>IGSF10, HMCN1, CD44, FBLN5, CD59, COL3A1, MSTN, IGF1, ELK3, TGFB2</i>            |
| GO:0007286~spermatid development            | 5          | 0.038591 | Pregnancy   | Down       | <i>MKKS, SIX5, KIT, KLHL10, PPP2R2B</i>                                             |
| GO:0042476~odontogenesis                    | 5          | 0.038591 | Pregnancy   | Down       | <i>BMP2, COL1A2, JAG2, COL1A1, TGFB2</i>                                            |
| GO:0042391~regulation of membrane potential | 8          | 0.040077 | Pregnancy   | Down       | <i>AMIGO1, KCNMA1, KCNMB4, GRIK1, CACNA1G, NLGN3, PPP3CA, CDK5</i>                  |
| GO:0001558~regulation of cell growth        | 10         | 0.041436 | Pregnancy   | Down       | <i>NOV, CDH13, WISP2, CD44, CCDC85B, CDKN2C, IGFBP7, MAP1B, WFDC1, TGFB2</i>        |
| GO:0007411~axon guidance                    | 7          | 0.041511 | Pregnancy   | Down       | <i>SEMA5A, ROBO1, EFNA2, EFNA5, SPON2, CDK5, FEZ1</i>                               |
| GO:0001709~cell fate determination          | 4          | 0.042457 | Pregnancy   | Down       | <i>HES1, NOTCH4, JAG2, JAG1</i>                                                     |
| GO:0009408~response to heat                 | 5          | 0.043227 | Pregnancy   | Down       | <i>HSPB6, IGFBP7, TRPV2, HSPB8, MSTN</i>                                            |
| GO:0060429~epithelium development           | 11         | 0.043943 | Pregnancy   | Down       | <i>ALDH1A2, BMP2, CD44, VEGFA, NOTCH4, JAG2, AHNK2, MKKS, TGFB111, JAG1, CITED1</i> |
| GO:0031667~response to nutrient levels      | 10         | 0.044928 | Pregnancy   | Down       | <i>ALDH1A2, SUOX, CCND1, NES, BMP2, CD44, BCHE, IGFBP7, MAP1B, COL1A1</i>           |
| GO:0048515~spermatid differentiation        | 5          | 0.045657 | Pregnancy   | Down       | <i>MKKS, SIX5, KIT, KLHL10, PPP2R2B</i>                                             |

| Term                                                    | Gene,<br>n | P-value  | Main Effect | Regulation | Genes                                                                                                                                                                                                              |
|---------------------------------------------------------|------------|----------|-------------|------------|--------------------------------------------------------------------------------------------------------------------------------------------------------------------------------------------------------------------|
| GO:0050806~positive regulation of synaptic transmission | 4          | 0.045776 | Pregnancy   | Down       | <i>COL4A4, GRIK1, NTRK2, OXTR</i>                                                                                                                                                                                  |
| GO:0008285~negative regulation of cell proliferation    | 15         | 0.048083 | Pregnancy   | Down       | <i>BMP2, IGFBP7, KLF11, SIX5, TGFB2, CDKN1C, CDH13, ALDH1A2, WISP2, CDKN2C, WFDC1, ASPH, TGFB11, FABP7, EIF2AK2</i>                                                                                                |
| GO:0007611~learning or memory                           | 7          | 0.04817  | Pregnancy   | Down       | <i>BCHE, FYN, CRHBP, OXTR, NLGN3, KIT, CDK5</i>                                                                                                                                                                    |
| GO:0009314~response to radiation                        | 10         | 0.048746 | Pregnancy   | Down       | <i>CCND1, NES, UACA, MSH2, COL3A1, DDB2, NLGN3, KIT, SNAI2, CDK5</i>                                                                                                                                               |
| GO:0051705~behavioral interaction between organisms     | 4          | 0.04922  | Pregnancy   | Down       | <i>PPP1R1B, OXTR, MKKS, NLGN3</i>                                                                                                                                                                                  |
| GO:0070482~response to oxygen levels                    | 8          | 0.050334 | Pregnancy   | Down       | <i>KCNMA1, EDNRA, PLOD2, VEGFA, JAG2, OXTR, CABCI, TGFB2</i>                                                                                                                                                       |
| GO:0031960~response to corticosteroid stimulus          | 6          | 0.050955 | Pregnancy   | Down       | <i>KCNMA1, CCND1, BCHE, IGFBP7, MSTN, COL1A1</i>                                                                                                                                                                   |
| GO:0051046~regulation of secretion                      | 10         | 0.05118  | Pregnancy   | Down       | <i>KCNMB4, EDN3, SERGEF, GRIK1, NTRK2, OXTR, SCG5, PFKM, CDK5, TGFB2</i>                                                                                                                                           |
| GO:0016043~cellular component organization              | 72         | 0.051531 | Pregnancy   | Down       | <i>MTSS1, EFNA2, KNTC1, NAP1L5, CITED1, LATS2, CBX6, TGFB2, TTLL3, CD44, SMARCD3, ROBO1, SERPINA5, SH3BGR, MKKS, COL12A1, VWAI, SPON2, COL11A1, RAMP2, PFKM, CDK5, FLNA, AMIGO1, HES1, EGFLAM, CNTROB, CC2D2A,</i> |

| Term                                                                  | Gene,<br>n | P-value  | Main Effect | Regulation | Genes                                                                                                                                                                                                                                                                                                              |
|-----------------------------------------------------------------------|------------|----------|-------------|------------|--------------------------------------------------------------------------------------------------------------------------------------------------------------------------------------------------------------------------------------------------------------------------------------------------------------------|
|                                                                       |            |          |             |            | <i>COLIA2, EFNA5, VCAN, KLHL10, COLIA1, DST, MIA, REPS2, MRAS, COL3A1, TIMM13, CDH2, POLR2A, SEMA5A, TUBB, CRISPLD2, CNN1, CLASP2, EHD2, DCLK1, CHD3, BMP2, TNXB, MSH2, MAP1B, MRC2, TAF7, IPO11, HSPG2, CCDC80, MYOZ1, NLGN3, NID1, COL5A3, CTR9, CDH13, STAB1, FBLN5, RAB34, NOTCH4, CD302, LRP4, DNMI, FEZ1</i> |
| GO:0007612~learning                                                   | 5          | 0.053395 | Pregnancy   | Down       | <i>BCHE, FYN, NLGN3, KIT, CDK5</i>                                                                                                                                                                                                                                                                                 |
| GO:0007179~transforming growth factor beta receptor signaling pathway | 5          | 0.053395 | Pregnancy   | Down       | <i>COL3A1, COLIA2, MSTN, CITED1, TGFB2</i>                                                                                                                                                                                                                                                                         |
| GO:0045785~positive regulation of cell adhesion                       | 5          | 0.053395 | Pregnancy   | Down       | <i>CDH13, EGFLAM, CCDC80, NID1, TGFB2</i>                                                                                                                                                                                                                                                                          |
| GO:0032844~regulation of homeostatic process                          | 7          | 0.053573 | Pregnancy   | Down       | <i>EDNRA, CD44, LDB1, LCK, VEGFA, CACNA1G, CDH2</i>                                                                                                                                                                                                                                                                |
| GO:0060350~endochondral bone morphogenesis                            | 3          | 0.053841 | Pregnancy   | Down       | <i>COL13A1, HSPG2, COLIA1</i>                                                                                                                                                                                                                                                                                      |
| GO:0007026~negative regulation of microtubule depolymerization        | 3          | 0.053841 | Pregnancy   | Down       | <i>MAP1A, MAP1B, CLASP2</i>                                                                                                                                                                                                                                                                                        |
| GO:0031114~regulation of microtubule depolymerization                 | 3          | 0.053841 | Pregnancy   | Down       | <i>MAP1A, MAP1B, CLASP2</i>                                                                                                                                                                                                                                                                                        |
| GO:0050982~detection of                                               | 3          | 0.053841 | Pregnancy   | Down       | <i>FYN, MKKS, COL11A1</i>                                                                                                                                                                                                                                                                                          |

| Term                                                                             | Gene,<br>n | P-value  | Main Effect | Regulation | Genes                                                                                                                        |
|----------------------------------------------------------------------------------|------------|----------|-------------|------------|------------------------------------------------------------------------------------------------------------------------------|
| mechanical stimulus                                                              |            |          |             |            |                                                                                                                              |
| GO:0030097~hemopoiesis                                                           | 11         | 0.054472 | Pregnancy   | Down       | <i>HOXB7, MSH2, LCK, VEGFA, NOTCH4, JAG2, PATZ1, KIT, JAG1, MLF1, TGFB2</i>                                                  |
| GO:0007610~behavior                                                              | 18         | 0.054736 | Pregnancy   | Down       | <i>KCNMA1, EDN3, GRIK1, ENPP2, CRHBP, OXTR, NLGN3, KIT, CDK5, ANKH, TGFB2, PTGDS, BCHE, PPP1R1B, FYN, ROBO1, NTRK2, MKKS</i> |
| GO:0051049~regulation of transport                                               | 17         | 0.05504  | Pregnancy   | Down       | <i>SERGEF, JPH4, EDN3, KCNMB4, GRIK1, OXTR, PFKM, CDK5, FLNA, SYNGR3, TGFB2, EDNRA, CDH13, UACA, NTRK2, SCG5, MBTPS1</i>     |
| GO:0001503~ossification                                                          | 7          | 0.055452 | Pregnancy   | Down       | <i>IGSF10, BMP2, COL13A1, HSPG2, IGF1, COL1A1, CDH11</i>                                                                     |
| GO:0044236~multicellular organismal metabolic process                            | 4          | 0.056475 | Pregnancy   | Down       | <i>TNXB, COL3A1, COL1A1, MMP11</i>                                                                                           |
| GO:0051971~positive regulation of transmission of nerve impulse                  | 4          | 0.056475 | Pregnancy   | Down       | <i>COL4A4, GRIK1, NTRK2, OXTR</i>                                                                                            |
| GO:0030335~positive regulation of cell migration                                 | 6          | 0.059848 | Pregnancy   | Down       | <i>EDN3, CDH13, VEGFA, IGF1, KIT, TGFB2</i>                                                                                  |
| GO:0031111~negative regulation of microtubule polymerization or depolymerization | 3          | 0.06009  | Pregnancy   | Down       | <i>MAP1A, MAP1B, CLASP2</i>                                                                                                  |

| Term                                                                                | Gene,<br>n | P-value  | Main Effect | Regulation | Genes                                                                                              |
|-------------------------------------------------------------------------------------|------------|----------|-------------|------------|----------------------------------------------------------------------------------------------------|
| GO:0007283~spermatogenesis                                                          | 13         | 0.062963 | Pregnancy   | Down       | <i>MSH2, CRTAP, JAG2, SIX5, KIT, TCFL5, SERPINA5, MKKS, GAMT, HSF2BP, CREB3L4, KLHL10, PPP2R2B</i> |
| GO:0048232~male gamete generation                                                   | 13         | 0.062963 | Pregnancy   | Down       | <i>MSH2, CRTAP, JAG2, SIX5, KIT, TCFL5, SERPINA5, MKKS, GAMT, HSF2BP, CREB3L4, KLHL10, PPP2R2B</i> |
| GO:0017015~regulation of transforming growth factor beta receptor signaling pathway | 4          | 0.064206 | Pregnancy   | Down       | <i>CDKN1C, PEG10, TGFB111, CITED1</i>                                                              |
| GO:0031646~positive regulation of neurological system process                       | 4          | 0.064206 | Pregnancy   | Down       | <i>COL4A4, GRIK1, NTRK2, OXTR</i>                                                                  |
| GO:0016477~cell migration                                                           | 12         | 0.064488 | Pregnancy   | Down       | <i>EDN3, CDH13, CD44, ROBO1, FYN, VCAN, CLASP2, KIT, CDH2, CDK5, DCLK1, TGFB2</i>                  |
| GO:0002520~immune system development                                                | 12         | 0.064488 | Pregnancy   | Down       | <i>HOXB7, MSH2, UNG, LCK, VEGFA, NOTCH4, JAG2, PATZ1, KIT, JAG1, MLF1, TGFB2</i>                   |
| GO:0050654~chondroitin sulfate proteoglycan metabolic process                       | 3          | 0.066572 | Pregnancy   | Down       | <i>EGFLAM, CHST7, IGF1</i>                                                                         |
| GO:0051094~positive regulation of developmental process                             | 12         | 0.066925 | Pregnancy   | Down       | <i>AMIGO1, IRX3, BMP2, SERPINF1, ROBO1, MAP1B, OXTR, TGFB111, KIT, JAG1, DDAH1, TGFB2</i>          |

| Term                                                    | Gene,<br>n | P-value  | Main Effect | Regulation | Genes                                                                                                                                                                                                                                                                         |
|---------------------------------------------------------|------------|----------|-------------|------------|-------------------------------------------------------------------------------------------------------------------------------------------------------------------------------------------------------------------------------------------------------------------------------|
| GO:0014070~response to organic cyclic substance         | 7          | 0.067558 | Pregnancy   | Down       | <i>EDNRA, CCND1, CD44, MSH2, IGFBP7, OXTR, CDK5</i>                                                                                                                                                                                                                           |
| GO:0010817~regulation of hormone levels                 | 8          | 0.06764  | Pregnancy   | Down       | <i>EDN3, ALDH1A2, SLC16A2, CPE, RBP1, CRHBP, CHST9, SCG5</i>                                                                                                                                                                                                                  |
| GO:0051224~negative regulation of protein transport     | 4          | 0.068244 | Pregnancy   | Down       | <i>SERGEF, UACA, CDK5, FLNA</i>                                                                                                                                                                                                                                               |
| GO:0007242~intracellular signaling cascade              | 39         | 0.068938 | Pregnancy   | Down       | <i>ADCY4, EDN3, GNAI1, MRAS, OXTR, KIT, LATS2, PLCL2, EDNRA, ALDH1A2, TYMS, CDC42EPI, ANP32A, DDAH1, DCLK1, PTGER4, MSH2, TAF7, ESRI, IGF1, NPR2, GEM, CDK5, RCAN2, FLNA, ARL3, CDH13, ICK, CCND1, UACA, RAB30, FYN, CA8, NOTCH4, RAB34, COL1A2, TGFB111, PHLDB2, NKIRAS1</i> |
| GO:0060317~cardiac epithelial to mesenchymal transition | 2          | 0.069322 | Pregnancy   | Down       | <i>BMP2, TGFB2</i>                                                                                                                                                                                                                                                            |
| GO:0002318~myeloid progenitor cell differentiation      | 2          | 0.069322 | Pregnancy   | Down       | <i>KIT, MLF1</i>                                                                                                                                                                                                                                                              |
| GO:0008218~bioluminescence                              | 2          | 0.069322 | Pregnancy   | Down       | <i>HMCN1, NID1</i>                                                                                                                                                                                                                                                            |
| GO:0007507~heart development                            | 10         | 0.070029 | Pregnancy   | Down       | <i>EDNRA, ALDH1A2, BMP2, SMARCD3, COL3A1, HSPG2, OXTR, MKKS, COL11A1, TGFB2</i>                                                                                                                                                                                               |



| Term                                                                | Gene,<br>n | P-value  | Main Effect | Regulation | Genes                                                                 |
|---------------------------------------------------------------------|------------|----------|-------------|------------|-----------------------------------------------------------------------|
| GO:0060348~bone development                                         | 7          | 0.07191  | Pregnancy   | Down       | <i>IGSF10, BMP2, COL13A1, HSPG2, IGF1, COL1A1, CDH11</i>              |
| GO:0060079~regulation of excitatory postsynaptic membrane potential | 3          | 0.073274 | Pregnancy   | Down       | <i>GRIK1, PPP3CA, CDK5</i>                                            |
| GO:0035176~social behavior                                          | 3          | 0.073274 | Pregnancy   | Down       | <i>OXTR, MKKS, NLGN3</i>                                              |
| GO:0051966~regulation of synaptic transmission, glutamatergic       | 3          | 0.073274 | Pregnancy   | Down       | <i>GRIK1, NTRK2, OXTR</i>                                             |
| GO:0008015~blood circulation                                        | 9          | 0.074283 | Pregnancy   | Down       | <i>KCNMA1, EDNRA, EDN3, ACTA2, VEGFA, COL1A2, CACNA1G, OXTR, NPR2</i> |
| GO:0003013~circulatory system process                               | 9          | 0.074283 | Pregnancy   | Down       | <i>KCNMA1, EDNRA, EDN3, ACTA2, VEGFA, COL1A2, CACNA1G, OXTR, NPR2</i> |
| GO:0070507~regulation of microtubule cytoskeleton organization      | 4          | 0.076657 | Pregnancy   | Down       | <i>MAP1A, MAP1B, CLASP2, DST</i>                                      |
| GO:0060349~bone morphogenesis                                       | 3          | 0.080183 | Pregnancy   | Down       | <i>COL13A1, HSPG2, COL1A1</i>                                         |
| GO:0051899~membrane depolarization                                  | 4          | 0.081027 | Pregnancy   | Down       | <i>GRIK1, CACNA1G, PPP3CA, CDK5</i>                                   |
| GO:0051272~positive                                                 | 6          | 0.08287  | Pregnancy   | Down       | <i>EDN3, CDH13, VEGFA, IGF1, KIT, TGFB2</i>                           |

| Term                                         | Gene,<br>n | P-value  | Main Effect | Regulation | Genes                                                                                                                                                                                                                                                                                                                                                                                                                                                                                                                                                                                                                                                                                                                                                                                                                                                                                                                                                                                                                      |
|----------------------------------------------|------------|----------|-------------|------------|----------------------------------------------------------------------------------------------------------------------------------------------------------------------------------------------------------------------------------------------------------------------------------------------------------------------------------------------------------------------------------------------------------------------------------------------------------------------------------------------------------------------------------------------------------------------------------------------------------------------------------------------------------------------------------------------------------------------------------------------------------------------------------------------------------------------------------------------------------------------------------------------------------------------------------------------------------------------------------------------------------------------------|
| regulation of cell motion                    |            |          |             |            |                                                                                                                                                                                                                                                                                                                                                                                                                                                                                                                                                                                                                                                                                                                                                                                                                                                                                                                                                                                                                            |
| GO:0040017~positive regulation of locomotion | 6          | 0.08287  | Pregnancy   | Down       | <i>EDN3, CDH13, VEGFA, IGF1, KIT, TGFB2</i>                                                                                                                                                                                                                                                                                                                                                                                                                                                                                                                                                                                                                                                                                                                                                                                                                                                                                                                                                                                |
| GO:0051050~positive regulation of transport  | 10         | 0.083612 | Pregnancy   | Down       | <i>EDNRA, EDN3, UACA, GRIK1, OXTR, PFKM, CDK5, SYNGR3, FLNA, TGFB2</i>                                                                                                                                                                                                                                                                                                                                                                                                                                                                                                                                                                                                                                                                                                                                                                                                                                                                                                                                                     |
| GO:0065007~biological regulation             | 191        | 0.083891 | Pregnancy   | Down       | <i>EDN3, ADCY4, MTSS1, EIF2C1, GRIK1, CCDC85B, CRHBP, KNTC1, JAG2, TSPAN6, JAG1, CITED1, CBX6, TGFB2, NOV, HMCN1, CD44, SERPINE2, PPP1R1B, CDKN2C, ROBO1, SMARCD3, TRAK1, ROBO4, CREB3L4, PATZ1, ASPH, DDAH1, TYRO3, PDXP, SIX5, MRGPRF, GEM, HES1, EGFLAM, SERPINF1, TCFL5, CPE, GTF2IRD1, VEGFA, COL1A2, WFDC1, TGFB111, COL1A1, MFAP4, EIF2AK2, DST, FXYD1, FGFR2, EID1, KCNMB4, EMCN, RBP1, ENPP2, GNAI1, MRAS, ELK3, MEIS1, PEG10, TUBB, PPP1R16B, CDC42EP1, BCHE, TEK, CLASP2, PPP2R2B, TCF4, ANGPTL2, BMP2, SPHK2, TAF7, KLF11, CCDC80, LMCD1, MSTN, ZNF521, ANKH, SYNGR3, GPR153, CDKN1C, SALL2, TBC1D24, LAMA4, UACA, PLK2, HOXB7, CD59, ITGA7, RGS5, NTRK2, NOTCH4, CACNA1G, FABP7, JPH4, ZNF532, IGFBP7, LATS2, EDNRA, WISP2, LBH, OSR2, SERPINA5, GEFT, ANP32A, MKKS, SOX18, KCNMA1, RAMP2, PTGER4, EGFL7, ACTA2, DDB1, LDB1, ESR1, PFKM, ARHGAP24, CDK5, NLRP1, FLNA, ARL3, AMIGO1, CCND1, PTGDS, CA8, CHST9, LCK, KLHL10, LCOR, NKIRAS1, GRASP, IRX3, FHLL1, COL3A1, OXTR, KIT, WTIP, CDH2, TPM2, TRIB2,</i> |

| Term                                                   | Gene,<br>n | P-value  | Main Effect | Regulation | Genes                                                                                                                                                                                                                                                                                                                                                                                      |
|--------------------------------------------------------|------------|----------|-------------|------------|--------------------------------------------------------------------------------------------------------------------------------------------------------------------------------------------------------------------------------------------------------------------------------------------------------------------------------------------------------------------------------------------|
|                                                        |            |          |             |            | <i>POLR2A, PLCL2, ALDH1A2, TYMS, PLEKHG2, TNRC6C, TCEA3, SCG5, TCEA2, PPP3CA, DDIT4L, CNN1, DCLK1, BRMS1L, MLLT3, PIK3R2, CHD3, COL4A4, SERGEF, TNXB, MSH2, MAP1A, MAP1B, IGF1, PHF10, DPYSL3, NLGN3, NID1, NPR2, DPYSL2, SNAI2, ZNF358, RCAN2, SIRT3, CDH13, SLC16A2, ICK, RAB30, STAB1, FYN, CSNK1E, DBP, ZNF362, FBLN5, PECAM1, RAB34, GAMT, PHLDB2, MBTPS1, NFIA, ADAMDEC1, GPR116</i> |
| GO:0010975~regulation of neuron projection development | 5          | 0.083933 | Pregnancy   | Down       | <i>AMIGO1, ROBO1, MAP1B, NTRK2, CDH2</i>                                                                                                                                                                                                                                                                                                                                                   |
| GO:0046928~regulation of neurotransmitter secretion    | 3          | 0.087283 | Pregnancy   | Down       | <i>KCNMB4, EDN3, NTRK2</i>                                                                                                                                                                                                                                                                                                                                                                 |
| GO:0030036~actin cytoskeleton organization             | 10         | 0.089116 | Pregnancy   | Down       | <i>MTSSI, TNXB, MRAS, MYOZ1, CNN1, CDK5, EHD2, DST, FLNA, TTLL3</i>                                                                                                                                                                                                                                                                                                                        |
| GO:0048534~hemopoietic or lymphoid organ development   | 11         | 0.09087  | Pregnancy   | Down       | <i>HOXB7, MSH2, LCK, VEGFA, NOTCH4, JAG2, PATZ1, KIT, JAG1, MLF1, TGFB2</i>                                                                                                                                                                                                                                                                                                                |
| GO:0014824~artery smooth muscle contraction            | 2          | 0.091347 | Pregnancy   | Down       | <i>EDNRA, CACNA1G</i>                                                                                                                                                                                                                                                                                                                                                                      |
| GO:0043589~skin morphogenesis                          | 2          | 0.091347 | Pregnancy   | Down       | <i>COL1A2, COL1A1</i>                                                                                                                                                                                                                                                                                                                                                                      |
| GO:0060120~inner ear receptor cell fate commitment     | 2          | 0.091347 | Pregnancy   | Down       | <i>HES1, JAG2</i>                                                                                                                                                                                                                                                                                                                                                                          |

| Term                                                   | Gene,<br>n | P-value  | Main Effect | Regulation | Genes                                                                                                    |
|--------------------------------------------------------|------------|----------|-------------|------------|----------------------------------------------------------------------------------------------------------|
| GO:0019695~choline metabolic process                   | 2          | 0.091347 | Pregnancy   | Down       | <i>BCHE, DMGDH</i>                                                                                       |
| GO:0014820~tonic smooth muscle contraction             | 2          | 0.091347 | Pregnancy   | Down       | <i>EDNRA, CACNA1G</i>                                                                                    |
| GO:0009912~auditory receptor cell fate commitment      | 2          | 0.091347 | Pregnancy   | Down       | <i>HES1, JAG2</i>                                                                                        |
| GO:0007281~germ cell development                       | 6          | 0.091452 | Pregnancy   | Down       | <i>MSH2, MKKS, SIX5, KIT, KLHL10, PPP2R2B</i>                                                            |
| GO:0051301~cell division                               | 12         | 0.092327 | Pregnancy   | Down       | <i>SEPT4, CCND1, CINP, ANXA11, CNTROB, KNTC1, CLASP2, KIT, CDK5, LATS2, ARL3, TGFB2</i>                  |
| GO:0009308~amine metabolic process                     | 15         | 0.093857 | Pregnancy   | Down       | <i>ACY1, SPHK2, GGT1, TGFB2, FAH, GGT5, EGFLAM, CHST7, BCHE, CHST9, DMGDH, GAMT, CARS2, UROC1, DDAH1</i> |
| GO:0045597~positive regulation of cell differentiation | 10         | 0.09437  | Pregnancy   | Down       | <i>AMIGO1, IRX3, BMP2, SERPINF1, ROBO1, MAP1B, TGFB111, KIT, JAG1, TGFB2</i>                             |
| GO:0007423~sensory organ development                   | 10         | 0.09437  | Pregnancy   | Down       | <i>KCNMA1, HES1, ALDH1A2, VEGFA, NTRK2, JAG2, SIX5, JAG1, COL11A1, TGFB2</i>                             |
| GO:0007157~heterophilic cell adhesion                  | 3          | 0.094563 | Pregnancy   | Down       | <i>AMIGO1, CADM3, CDH2</i>                                                                               |
| GO:0048660~regulation of smooth muscle cell            | 4          | 0.094757 | Pregnancy   | Down       | <i>CDH13, VEGFA, NOTCH4, IGF1</i>                                                                        |

| Term                                                 | Gene,<br>n | P-value  | Main Effect | Regulation | Genes                                                                                                                                                                                                                                                 |
|------------------------------------------------------|------------|----------|-------------|------------|-------------------------------------------------------------------------------------------------------------------------------------------------------------------------------------------------------------------------------------------------------|
| proliferation                                        |            |          |             |            |                                                                                                                                                                                                                                                       |
| GO:0050795~regulation of behavior                    | 4          | 0.094757 | Pregnancy   | Down       | <i>EDN3, CDH13, PTGDS, VEGFA</i>                                                                                                                                                                                                                      |
| GO:0045664~regulation of neuron differentiation      | 7          | 0.096012 | Pregnancy   | Down       | <i>AMIGO1, HES1, IRX3, ROBO1, MAP1B, NTRK2, CDH2</i>                                                                                                                                                                                                  |
| GO:0050954~sensory perception of mechanical stimulus | 6          | 0.097419 | Pregnancy   | Down       | <i>FYN, MAP1A, MKKS, TIMM13, COL1A1, COL11A1</i>                                                                                                                                                                                                      |
| GO:0001666~response to hypoxia                       | 7          | 0.098634 | Pregnancy   | Down       | <i>KCNMA1, EDNRA, PLOD2, VEGFA, JAG2, CABCI, TGFB2</i>                                                                                                                                                                                                |
| GO:0043687~post-translational protein modification   | 36         | 0.099237 | Pregnancy   | Down       | <i>FGFR2, DZIP3, COL3A1, KIT, TRIB2, LATS2, TTLL3, TGFB2, HMCN1, ST3GAL6, TEK, PPP3CA, ASPH, DCLK1, TYRO3, BMP2, PTPRD, DDB1, PTPRS, NID1, NPR2, CDK5, CTR9, SIRT3, ICK, CCND1, EGFLAM, PLK2, FYN, CSNK1E, NTRK2, LCK, DDB2, EIF2AK2, MYLK, DUSP7</i> |
| <b>[REDACTED]</b>                                    |            |          |             |            |                                                                                                                                                                                                                                                       |
| GO:0042384~cilium assembly                           | 4          | 1.90E-04 | Lactation   | Up         | <i>BBS4, BBS5, ALMS1, PCM1</i>                                                                                                                                                                                                                        |
| GO:0060271~cilium morphogenesis                      | 4          | 3.13E-04 | Lactation   | Up         | <i>BBS4, BBS5, ALMS1, PCM1</i>                                                                                                                                                                                                                        |
| GO:0006417~regulation of translation                 | 5          | 0.002252 | Lactation   | Up         | <i>EIF4E3, EIF2C2, PUM2, EIF2AK3, EIF2C3</i>                                                                                                                                                                                                          |

| Term                                                          | Gene,<br>n | P-value  | Main Effect | Regulation | Genes                                                                                                                                                   |
|---------------------------------------------------------------|------------|----------|-------------|------------|---------------------------------------------------------------------------------------------------------------------------------------------------------|
| GO:0030031~cell projection assembly                           | 4          | 0.004564 | Lactation   | Up         | <i>BBS4, BBS5, ALMS1, PCM1</i>                                                                                                                          |
| GO:0017148~negative regulation of translation                 | 3          | 0.008272 | Lactation   | Up         | <i>EIF2C2, EIF2AK3, EIF2C3</i>                                                                                                                          |
| GO:0010608~posttranscriptional regulation of gene expression  | 5          | 0.010333 | Lactation   | Up         | <i>EIF4E3, EIF2C2, PUM2, EIF2AK3, EIF2C3</i>                                                                                                            |
| GO:0035239~tube morphogenesis                                 | 4          | 0.014619 | Lactation   | Up         | <i>BBS4, BBS5, SIX1, KDR</i>                                                                                                                            |
| GO:0046548~retinal rod cell development                       | 2          | 0.016056 | Lactation   | Up         | <i>BBS4, ALMS1</i>                                                                                                                                      |
| GO:0006468~protein amino acid phosphorylation                 | 8          | 0.01732  | Lactation   | Up         | <i>PAN3, PDK4, WNK1, AKAP9, RAGE, EIF2AK3, MST4, KDR</i>                                                                                                |
| GO:0050793~regulation of developmental process                | 8          | 0.018239 | Lactation   | Up         | <i>SIX1, NPTN, AP3D1, MSTN, ALMS1, EIF2AK3, KDR, ANGPTL4</i>                                                                                            |
| GO:0032502~developmental process                              | 21         | 0.018699 | Lactation   | Up         | <i>BBS4, BBS5, SOCS2, UFD1L, AQP4, ALMS1, MSTN, KCNRG, PCM1, KDR, FXR1, ARHGEF11, HYDIN, ATP2A2, RASGRP1, SIX1, NPTN, AP3D1, ODF2, EIF2AK3, ANGPTL4</i> |
| GO:0040033~negative regulation of translation, ncRNA-mediated | 2          | 0.02003  | Lactation   | Up         | <i>EIF2C2, EIF2C3</i>                                                                                                                                   |

| Term                                                                   | Gene,<br>n | P-value  | Main Effect | Regulation | Genes                                                                                                                      |
|------------------------------------------------------------------------|------------|----------|-------------|------------|----------------------------------------------------------------------------------------------------------------------------|
| GO:0035278~gene silencing by miRNA, negative regulation of translation | 2          | 0.02003  | Lactation   | Up         | <i>EIF2C2, EIF2C3</i>                                                                                                      |
| GO:0045974~regulation of translation, ncRNA-mediated                   | 2          | 0.02003  | Lactation   | Up         | <i>EIF2C2, EIF2C3</i>                                                                                                      |
| GO:0044267~cellular protein metabolic process                          | 17         | 0.021319 | Lactation   | Up         | <i>USPL1, EIF4E3, EIF2C2, PAN3, SOCS2, UFD1L, PDK4, WNK1, AKAP9, MST4, KDR, ST13, ARIH1, PCMTD2, RAGE, EIF2AK3, DNAJB6</i> |
| GO:0043473~pigmentation                                                | 3          | 0.023661 | Lactation   | Up         | <i>BBS4, BBS5, AP3D1</i>                                                                                                   |
| GO:0006986~response to unfolded protein                                | 3          | 0.033326 | Lactation   | Up         | <i>HSPA4, EIF2AK3, DNAJB6</i>                                                                                              |
| GO:0032402~melanosome transport                                        | 2          | 0.03577  | Lactation   | Up         | <i>BBS4, BBS5</i>                                                                                                          |
| GO:0048869~cellular developmental process                              | 13         | 0.037369 | Lactation   | Up         | <i>BBS4, BBS5, ALMS1, PCM1, FXR1, KDR, ARHGEF11, RASGRP1, SIX1, NPTN, ODF2, EIF2AK3, ANGPTL4</i>                           |
| GO:0051904~pigment granule transport                                   | 2          | 0.039666 | Lactation   | Up         | <i>BBS4, BBS5</i>                                                                                                          |
| GO:0032401~establishment of melanosome localization                    | 2          | 0.039666 | Lactation   | Up         | <i>BBS4, BBS5</i>                                                                                                          |
| GO:0016310~phosphorylation                                             | 8          | 0.041168 | Lactation   | Up         | <i>PAN3, PDK4, WNK1, AKAP9, RAGE, EIF2AK3, MST4, KDR</i>                                                                   |

| Term                                                       | Gene,<br>n | P-value  | Main Effect | Regulation | Genes                                                                                                                               |
|------------------------------------------------------------|------------|----------|-------------|------------|-------------------------------------------------------------------------------------------------------------------------------------|
| GO:0051905~establishment of pigment granule localization   | 2          | 0.043547 | Lactation   | Up         | <i>BBS4, BBS5</i>                                                                                                                   |
| GO:0019538~protein metabolic process                       | 18         | 0.048498 | Lactation   | Up         | <i>USPL1, EIF4E3, EIF2C2, PAN3, SOCS2, UFD1L, PDK4, WNK1, AKAP9, TINAGL1, MST4, KDR, ST13, ARIH1, PCMTD2, RAGE, EIF2AK3, DNAJB6</i> |
| GO:0009653~anatomical structure morphogenesis              | 10         | 0.049266 | Lactation   | Up         | <i>BBS4, BBS5, SIX1, MSTN, ALMS1, KCNRG, PCM1, ARHGEF11, KDR, ANGPTL4</i>                                                           |
| GO:0032400~melanosome localization                         | 2          | 0.051262 | Lactation   | Up         | <i>BBS4, BBS5</i>                                                                                                                   |
| GO:0045947~negative regulation of translational initiation | 2          | 0.051262 | Lactation   | Up         | <i>EIF2C2, EIF2AK3</i>                                                                                                              |
| GO:0051875~pigment granule localization                    | 2          | 0.055096 | Lactation   | Up         | <i>BBS4, BBS5</i>                                                                                                                   |
| GO:0000902~cell morphogenesis                              | 5          | 0.055323 | Lactation   | Up         | <i>BBS4, BBS5, ALMS1, PCM1, ARHGEF11</i>                                                                                            |
| GO:0035295~tube development                                | 4          | 0.059163 | Lactation   | Up         | <i>BBS4, BBS5, SIX1, KDR</i>                                                                                                        |
| GO:0035195~gene silencing by miRNA                         | 2          | 0.066509 | Lactation   | Up         | <i>EIF2C2, EIF2C3</i>                                                                                                               |
| GO:0007265~Ras protein                                     | 3          | 0.067169 | Lactation   | Up         | <i>ARHGEF3, RASGRP1, ARHGEF11</i>                                                                                                   |



| Term                                                 | Gene,<br>n | P-value  | Main Effect | Regulation | Genes                                                                                                               |
|------------------------------------------------------|------------|----------|-------------|------------|---------------------------------------------------------------------------------------------------------------------|
| signal transduction                                  |            |          |             |            |                                                                                                                     |
| GO:0008219~cell death                                | 7          | 0.068906 | Lactation   | Up         | <i>ARHGEF3, ZFYVE26, ALMS1, EIF2AK3, MST4, ARHGEF11, FXR1</i>                                                       |
| GO:0051789~response to protein stimulus              | 3          | 0.069414 | Lactation   | Up         | <i>HSPA4, EIF2AK3, DNAJB6</i>                                                                                       |
| GO:0016265~death                                     | 7          | 0.070756 | Lactation   | Up         | <i>ARHGEF3, ZFYVE26, ALMS1, EIF2AK3, MST4, ARHGEF11, FXR1</i>                                                       |
| GO:0048856~anatomical structure development          | 16         | 0.07319  | Lactation   | Up         | <i>BBS4, BBS5, UFD1L, AQP4, ALMS1, MSTN, KCNRG, PCM1, KDR, FXR1, ARHGEF11, ATP2A2, SIX1, NPTN, EIF2AK3, ANGPTL4</i> |
| GO:0032989~cellular component morphogenesis          | 5          | 0.076073 | Lactation   | Up         | <i>BBS4, BBS5, ALMS1, PCM1, ARHGEF11</i>                                                                            |
| GO:0048858~cell projection morphogenesis             | 4          | 0.076347 | Lactation   | Up         | <i>BBS4, BBS5, ALMS1, PCM1</i>                                                                                      |
| GO:0042462~eye photoreceptor cell development        | 2          | 0.077786 | Lactation   | Up         | <i>BBS4, ALMS1</i>                                                                                                  |
| GO:0016441~posttranscriptional gene silencing        | 2          | 0.081515 | Lactation   | Up         | <i>EIF2C2, EIF2C3</i>                                                                                               |
| GO:0035194~posttranscriptional gene silencing by RNA | 2          | 0.081515 | Lactation   | Up         | <i>EIF2C2, EIF2C3</i>                                                                                               |

| Term                                              | Gene,<br>n | P-value  | Main Effect | Regulation | Genes                                                    |
|---------------------------------------------------|------------|----------|-------------|------------|----------------------------------------------------------|
| GO:0001754~eye photoreceptor cell differentiation | 2          | 0.081515 | Lactation   | Up         | <i>BBS4, ALMS1</i>                                       |
| GO:0032990~cell part morphogenesis                | 4          | 0.084538 | Lactation   | Up         | <i>BBS4, BBS5, ALMS1, PCMI</i>                           |
| GO:0001947~heart looping                          | 2          | 0.085229 | Lactation   | Up         | <i>BBS4, BBS5</i>                                        |
| GO:0033059~cellular pigmentation                  | 2          | 0.088929 | Lactation   | Up         | <i>BBS4, BBS5</i>                                        |
| GO:0042461~photoreceptor cell development         | 2          | 0.092614 | Lactation   | Up         | <i>BBS4, ALMS1</i>                                       |
| GO:0006915~apoptosis                              | 6          | 0.094949 | Lactation   | Up         | <i>ARHGEF3, ALMS1, EIF2AK3, MST4, ARHGEF11, FXR1</i>     |
| GO:0006796~phosphate metabolic process            | 8          | 0.095477 | Lactation   | Up         | <i>PAN3, PDK4, WNK1, AKAP9, RAGE, EIF2AK3, MST4, KDR</i> |
| GO:0006793~phosphorus metabolic process           | 8          | 0.095477 | Lactation   | Up         | <i>PAN3, PDK4, WNK1, AKAP9, RAGE, EIF2AK3, MST4, KDR</i> |
| GO:0046530~photoreceptor cell differentiation     | 2          | 0.096284 | Lactation   | Up         | <i>BBS4, ALMS1</i>                                       |
| GO:0012501~programmed cell death                  | 6          | 0.099584 | Lactation   | Up         | <i>ARHGEF3, ALMS1, EIF2AK3, MST4, ARHGEF11, FXR1</i>     |

|                                                                     |    |          |           |      |                                                                                                                          |
|---------------------------------------------------------------------|----|----------|-----------|------|--------------------------------------------------------------------------------------------------------------------------|
| GO:0009052~pentose-phosphate shunt, non-oxidative branch            | 2  | 0.013556 | Lactation | Down | <i>TALDO1, RPIA</i>                                                                                                      |
| GO:0043123~positive regulation of I-kappaB kinase/NF-kappaB cascade | 4  | 0.028389 | Lactation | Down | <i>LGALS1, TSPAN6, TGM2, NFKBIL1</i>                                                                                     |
| GO:0046496~nicotinamide nucleotide metabolic process                | 3  | 0.030196 | Lactation | Down | <i>LDHB, TALDO1, RPIA</i>                                                                                                |
| GO:0006769~nicotinamide metabolic process                           | 3  | 0.030196 | Lactation | Down | <i>LDHB, TALDO1, RPIA</i>                                                                                                |
| GO:0009820~alkaloid metabolic process                               | 3  | 0.031607 | Lactation | Down | <i>LDHB, TALDO1, RPIA</i>                                                                                                |
| GO:0006457~protein folding                                          | 5  | 0.03258  | Lactation | Down | <i>PDIA2, BAG3, PPIL1, LMAN2L, DNAJC19</i>                                                                               |
| GO:0019362~pyridine nucleotide metabolic process                    | 3  | 0.033043 | Lactation | Down | <i>LDHB, TALDO1, RPIA</i>                                                                                                |
| GO:0006996~organelle organization                                   | 16 | 0.034983 | Lactation | Down | <i>EIF6, NPLOC4, RSF1, ABCD1, ARFIP2, FHL3, NAP1L5, PEX11G, LATS2, CHRAC1, MACF1, SUPT4H1, CNN1, APBB1, EMD, DNAJC19</i> |
| GO:0043122~regulation of I-kappaB kinase/NF-kappaB cascade          | 4  | 0.036423 | Lactation | Down | <i>LGALS1, TSPAN6, TGM2, NFKBIL1</i>                                                                                     |
| GO:0006733~oxidoreduction coenzyme metabolic process                | 3  | 0.048723 | Lactation | Down | <i>LDHB, TALDO1, RPIA</i>                                                                                                |

| Term                                                               | Gene,<br>n | P-value  | Main Effect | Regulation | Genes                                                                  |
|--------------------------------------------------------------------|------------|----------|-------------|------------|------------------------------------------------------------------------|
| GO:0000079~regulation of cyclin-dependent protein kinase activity  | 3          | 0.052128 | Lactation   | Down       | <i>CKS1B, HEXIM2, LATS2</i>                                            |
| GO:0043603~cellular amide metabolic process                        | 3          | 0.055615 | Lactation   | Down       | <i>LDHB, TALDO1, RPIA</i>                                              |
| GO:0006338~chromatin remodeling                                    | 3          | 0.055615 | Lactation   | Down       | <i>CHRAC1, RSF1, SUPT4H1</i>                                           |
| GO:0012501~programmed cell death                                   | 9          | 0.05612  | Lactation   | Down       | <i>SIVA1, PDIA2, BAG3, LGALS1, TGM2, PSENEN, APBB1, NLRP1, NFKBIL1</i> |
| GO:0006007~glucose catabolic process                               | 3          | 0.059182 | Lactation   | Down       | <i>LDHB, TALDO1, RPIA</i>                                              |
| GO:0006098~pentose-phosphate shunt                                 | 2          | 0.059585 | Lactation   | Down       | <i>TALDO1, RPIA</i>                                                    |
| GO:0055086~nucleobase, nucleoside and nucleotide metabolic process | 6          | 0.064274 | Lactation   | Down       | <i>LDHB, TALDO1, NUDT3, PEMT, RPIA, ATP6V1F</i>                        |
| GO:0006917~induction of apoptosis                                  | 6          | 0.067073 | Lactation   | Down       | <i>SIVA1, HIPK1, TGM2, PSENEN, NLRP1, NFKBIL1</i>                      |
| GO:0012502~induction of programmed cell death                      | 6          | 0.067783 | Lactation   | Down       | <i>SIVA1, HIPK1, TGM2, PSENEN, NLRP1, NFKBIL1</i>                      |
| GO:0045736~negative regulation of cyclin-dependent                 | 2          | 0.072341 | Lactation   | Down       | <i>HEXIM2, LATS2</i>                                                   |

| Term                                                      | Gene,<br>n | P-value  | Main Effect | Regulation | Genes                                                    |
|-----------------------------------------------------------|------------|----------|-------------|------------|----------------------------------------------------------|
| protein kinase activity                                   |            |          |             |            |                                                          |
| GO:0019321~pentose metabolic process                      | 2          | 0.072341 | Lactation   | Down       | <i>TALDO1, RPIA</i>                                      |
| GO:0043065~positive regulation of apoptosis               | 7          | 0.072729 | Lactation   | Down       | <i>SIVA1, HIPK1, TGM2, PSEKEN, APBB1, NLRP1, NFKBIL1</i> |
| GO:0043068 ~positive regulation of programmed cell death  | 7          | 0.074655 | Lactation   | Down       | <i>SIVA1, HIPK1, TGM2, PSEKEN, APBB1, NLRP1, NFKBIL1</i> |
| GO:0010942~positive regulation of cell death              | 7          | 0.075956 | Lactation   | Down       | <i>SIVA1, HIPK1, TGM2, PSEKEN, APBB1, NLRP1, NFKBIL1</i> |
| GO:0044092~negative regulation of molecular function      | 6          | 0.077398 | Lactation   | Down       | <i>SIVA1, RSF1, HEXIM2, CALM3, MLLT1, LATS2</i>          |
| GO:0019320~hexose catabolic process                       | 3          | 0.080106 | Lactation   | Down       | <i>LDHB, TALDO1, RPIA</i>                                |
| GO:0046365~monosaccharide catabolic process               | 3          | 0.084127 | Lactation   | Down       | <i>LDHB, TALDO1, RPIA</i>                                |
| GO:0000904~cell morphogenesis involved in differentiation | 5          | 0.084842 | Lactation   | Down       | <i>S100A4, MACF1, APBB1, DCLK1, FEZ1</i>                 |
| GO:0006006~glucose metabolic process                      | 4          | 0.086267 | Lactation   | Down       | <i>LDHB, TALDO1, GALT, RPIA</i>                          |

| Term                                                                    | Gene, n | P-value  | Main Effect | Regulation | Genes                                                                                                            |
|-------------------------------------------------------------------------|---------|----------|-------------|------------|------------------------------------------------------------------------------------------------------------------|
| GO:0042981~regulation of apoptosis                                      | 10      | 0.09597  | Lactation   | Down       | <i>SIVA1, HIPK1, BAG3, LGALS1, TGM2, PSENEN, APBB1, NLRP1, NFKBIL1, GSTP1</i>                                    |
|                                                                         |         |          |             |            |                                                                                                                  |
| GO:0006464~protein modification process                                 | 12      | 0.022689 | Interaction | ---        | <i>ALPK1, HECTD3, USP20, RELN, DUSP12, HERC2, TRRAP, TTLL12, TRIP12, GAK, HEMK1, NRBP2</i>                       |
| GO:0070647~protein modification by small protein conjugation or removal | 4       | 0.024397 | Interaction | ---        | <i>USP20, HERC2, TRRAP, TRIP12</i>                                                                               |
| GO:0043412 ~biopolymer modification                                     | 12      | 0.031273 | Interaction | ---        | <i>ALPK1, HECTD3, USP20, RELN, DUSP12, HERC2, TRRAP, TTLL12, TRIP12, GAK, HEMK1, NRBP2</i>                       |
| GO:0043687~post-translational protein modification                      | 10      | 0.037754 | Interaction | ---        | <i>ALPK1, USP20, RELN, DUSP12, HERC2, TRRAP, TRIP12, GAK, HEMK1, NRBP2</i>                                       |
| GO:0046907~intracellular transport                                      | 7       | 0.041723 | Interaction | ---        | <i>STX5, MCM3AP, KIF3B, AP3D1, CSPG5, HERC2, SYTL1</i>                                                           |
| GO:0006886~intracellular protein transport                              | 5       | 0.05753  | Interaction | ---        | <i>STX5, MCM3AP, AP3D1, HERC2, SYTL1</i>                                                                         |
| GO:0044267~cellular protein metabolic process                           | 15      | 0.064003 | Interaction | ---        | <i>ALPK1, RPS15A, DUSP12, HERC2, TRRAP, TTLL12, GAK, MGRN1, RPL21, USP20, HECTD3, RELN, TRIP12, NRBP2, HEMK1</i> |
| GO:0051641~cellular                                                     | 8       | 0.067427 | Interaction | ---        | <i>STX5, MCM3AP, KIF3B, AP3D1, CSPG5, HERC2,</i>                                                                 |

| Term                                                           | Gene,<br>n | P-value  | Main Effect | Regulation | Genes                                    |
|----------------------------------------------------------------|------------|----------|-------------|------------|------------------------------------------|
| localization                                                   |            |          |             |            | <i>SYTL1, TACC2</i>                      |
| GO:0034613~cellular protein localization                       | 5          | 0.075753 | Interaction | ---        | <i>STX5, MCM3AP, AP3D1, HERC2, SYTL1</i> |
| GO:0070727~cellular macromolecule localization                 | 5          | 0.077346 | Interaction | ---        | <i>STX5, MCM3AP, AP3D1, HERC2, SYTL1</i> |
| GO:0030071~regulation of mitotic metaphase/anaphase transition | 2          | 0.08236  | Interaction | ---        | <i>HECTD3, HERC2</i>                     |
| GO:0016579~protein deubiquitination                            | 2          | 0.096602 | Interaction | ---        | <i>USP20, TRRAP</i>                      |
